# Supplementary material for: Fungal-bacteria interactions provide shelter for bacteria in Caesarean section scar diverticulum
Source: bioRxiv preprint, doi:10.1101/2023.08.07.552220, version 3 (2024-01-09)
Supplement: Supplement table1 [file 552220_file02.xlsx]

## Sheet: fungi
species	CSD01	CSD02	CSD03	CSD06	CSD07	CSD08	CSD09	CSD10	CSD11	CSD12	CSD13	CSD14	CSD15	CSD16	CSD17	CSD18	CSD22	CSD23	CSD24	CSD25	CSD27	CSD28	CSD29	CSD30	CON03	CON04	CON05	CON06	CON07	CON09	CON10	CON11	CON13	CON14	CON15	CON16	CON17	CON18	CON19	CON20	CON21	CON22	CON23	CON25	CON26	CON27	CON29	CON30
k__Fungi;p__Ascomycota;c__Dothideomycetes;o__Acrospermales;f__Acrospermaceae;g__Pseudovirgaria;s__Pseudovirgaria_hyperparasitica	0	0	1.59e-06	0	0	0	0	0	0	0	0	0	0	0	0	0	0	0	0	0	0	0	0	0	2.69e-06	0	4.87e-06	2.07e-06	2.94e-06	1.9e-06	1.84e-06	0	0	0	0	0	0	0	0	0	0	0	0	0	0	0	0	0
k__Fungi;p__Ascomycota;c__Dothideomycetes;o__Aulographales;f__Aulographaceae;g__Aulographum;s__Aulographum_hederae	0	0	0	3.22e-06	0	0	0	0	3.65e-06	1.99e-06	1.19e-05	1.55e-06	0	0	4.52e-06	0	0	2.03e-06	0	0	0	3.27e-06	2.27e-06	1.4e-06	0	0	0	1.69e-06	0	0	5.81e-06	0	1.51e-06	0	0	0	0	0	1.39e-06	0	2.16e-06	0	0	0	0	0	0	0
k__Fungi;p__Ascomycota;c__Dothideomycetes;o__Botryosphaeriales;f__Botryosphaeriaceae;g__Macrophomina;s__Macrophomina_phaseolina	0	0	2.17e-06	1.84e-06	0	0	0	0	0	1.14e-05	0	0	0	0	0	0	0	0	0	0	0	0	0	1.59e-06	0	0	0	0	0	0	0	0	0	0	0	2.75e-06	0	0	4.78e-06	0	0	0	0	0	0	0	0	0
k__Fungi;p__Ascomycota;c__Dothideomycetes;o__Botryosphaeriales;f__Botryosphaeriaceae;g__Neofusicoccum;s__Neofusicoccum_parvum	6.17e-06	0	2.03e-06	0	0	0	0	2.35e-06	0	0	0	1.65e-06	0	0	0	7.11e-06	2.53e-06	0	1.88e-06	0	1.91e-06	5.23e-06	0	0	0	0	0	1.8e-06	0	4.99e-06	0	0	3.22e-06	0	3.4e-06	0	2.56e-06	0	0	0	0	5.89e-06	0	0	0	0	1.77e-06	1.9e-06
k__Fungi;p__Ascomycota;c__Dothideomycetes;o__Capnodiales;f__Capnodiaceae;g__Polychaeton;s__Polychaeton_citri	2.63e-06	2.36e-06	1.14e-05	6.77e-06	9.17e-06	2e-05	1.15e-05	1.06e-05	1.21e-05	1.14e-05	5.94e-06	4.65e-06	4.85e-06	5.02e-06	8.16e-06	9.93e-06	8.56e-06	1.22e-05	1.48e-05	4.58e-06	6.48e-06	1.57e-05	2.73e-06	1.26e-05	2.38e-06	8.24e-06	3.95e-06	3.05e-06	1.06e-05	1.36e-05	1.16e-05	2.75e-06	9.09e-06	1.45e-05	3.84e-06	7.24e-06	8.65e-06	3.63e-06	2.52e-06	1.16e-05	1.17e-05	6.64e-06	1.19e-05	6.8e-06	6.81e-06	3.94e-06	2.99e-06	7.49e-06
k__Fungi;p__Ascomycota;c__Dothideomycetes;o__Capnodiales;f__Piedraiaceae;g__Piedraia;s__Piedraia_hortae	0	0	0	3.68e-06	2.18e-06	0	0	0	0	0	0	0	0	1.81e-06	0	1.9e-06	0	0	0	5.23e-06	0	0	0	0	3.31e-06	0	2.98e-06	3.44e-06	1.83e-06	5.34e-06	2.65e-06	1.74e-06	0	2.3e-06	0	0	0	0	0	0	0	0	0	2.15e-06	0	0	0	0
k__Fungi;p__Ascomycota;c__Dothideomycetes;o__Dothideales;f__Dothioraceae;g__Delphinella;s__Delphinella_strobiligena	0	0	0	0	0	0	0	0	0	0	0	0	0	0	0	0	0	0	0	0	0	0	0	0	0	0	2.86e-06	1.47e-06	0	0	0	0	0	0	0	0	0	0	0	0	0	0	0	0	0	0	0	0
k__Fungi;p__Ascomycota;c__Dothideomycetes;o__Dothideales;f__Saccotheciaceae;g__Aureobasidium;s__Aureobasidium_namibiae	1.75e-06	0	8.64e-07	0	0	0	0	0	0	0	0	0	0	0	0	0	0	0	0	0	0	0	0	0	1.2e-06	0	1.77e-06	4.03e-06	1.71e-06	3.94e-06	8.8e-07	0	0	0	0	0	0	0	0	0	0	0	0	0	0	0	0	0
k__Fungi;p__Ascomycota;c__Dothideomycetes;o__Dothideales;f__Saccotheciaceae;g__Aureobasidium;s__Aureobasidium_pullulans	2e-06	8.32e-06	0	1.67e-06	0	6.09e-06	3.97e-06	0	4.87e-06	2.07e-06	0	5.97e-06	1.19e-06	0	0	4.69e-06	0	1.81e-06	1.83e-06	9.27e-06	0	1.7e-06	4.03e-06	0	6.06e-06	2.03e-06	2.43e-06	0	1.42e-06	2.77e-06	0	0	5.6e-06	0	0	0	0	0	2.69e-06	0	1.92e-06	4.91e-06	0	1.67e-06	2.01e-06	0	0	1.85e-06
k__Fungi;p__Ascomycota;c__Dothideomycetes;o__Dothideales;f__Saccotheciaceae;g__Aureobasidium;s__Aureobasidium_subglaciale	1.56e-06	0	1.54e-06	0	0	0	0	0	0	0	0	0	0	0	0	0	0	0	0	0	0	0	0	0	1.07e-06	0	2.65e-06	0	2.59e-06	0	1.56e-06	0	0	0	0	0	0	0	0	0	0	0	0	0	0	0	0	0
k__Fungi;p__Ascomycota;c__Dothideomycetes;o__Eremomycetales;f__Eremomycetaceae;g__Eremomyces;s__Eremomyces_bilateralis	0	0	0	0	0	0	0	2.49e-06	0	4.49e-06	0	3.49e-06	0	0	0	0	0	4.58e-06	0	0	0	0	2.56e-06	0	1.55e-06	0	3.86e-06	3.89e-06	0	0	0	1.71e-06	1.7e-06	0	0	0	0	0	0	0	0	0	0	0	0	9.84e-06	0	0
k__Fungi;p__Ascomycota;c__Dothideomycetes;o__Lineolatales;f__Lineolataceae;g__Lineolata;s__Lineolata_rhizophorae	4.36e-06	0	1.73e-06	8.55e-06	7.23e-06	0	5.51e-06	2.35e-06	1.66e-06	3.62e-06	5.39e-06	3.3e-06	0	1.93e-06	0	2.31e-06	0	0	0	0	1.91e-06	6.2e-06	0	0	1.41e-06	0	1.95e-06	7.43e-06	1.42e-06	1.39e-06	2.62e-06	0	4.6e-06	1.83e-06	4.35e-06	2.19e-06	2.56e-06	0	7.44e-06	2.5e-06	3.93e-06	2.94e-06	5.56e-06	4.02e-06	2.42e-06	0	0	1.62e-06
k__Fungi;p__Ascomycota;c__Dothideomycetes;o__Mycosphaerellales;f__Dissoconiaceae;g__Dissoconium;s__Dissoconium_aciculare	0	0	0	0	0	0	0	0	0	0	0	0	0	0	0	0	0	0	0	0	0	0	0	0	1.07e-06	0	3.17e-06	0	3.88e-06	0	1.56e-06	0	0	0	0	0	0	0	0	0	0	0	0	0	0	0	0	0
k__Fungi;p__Ascomycota;c__Dothideomycetes;o__Mycosphaerellales;f__Mycosphaerellaceae;g__Cercospora;s__Cercospora_zeae-maydis	2.17e-06	0	0	1.87e-06	2.21e-06	4.47e-06	2.15e-06	2.49e-06	6.29e-06	0	0	0	6.23e-06	1.83e-06	0	3.86e-06	0	0	0	6.87e-06	2.02e-06	0	0	3.14e-06	1.53e-06	2.2e-06	5.15e-06	3.89e-06	5.57e-06	0	0	0	0	0	0	0	0	0	0	0	0	6.4e-06	1.59e-06	4.37e-06	0	0	1.92e-06	0
k__Fungi;p__Ascomycota;c__Dothideomycetes;o__Mycosphaerellales;f__Mycosphaerellaceae;g__Dothistroma;s__Dothistroma_septosporum	0	0	0	0	0	0	0	0	0	0	0	0	0	0	0	0	0	0	0	0	0	0	0	0	0	0	0	3.42e-06	0	1.58e-06	5.88e-06	0	0	0	0	0	0	0	0	0	0	0	0	0	0	0	0	0
k__Fungi;p__Ascomycota;c__Dothideomycetes;o__Mycosphaerellales;f__Mycosphaerellaceae;g__Zasmidium;s__Zasmidium_cellare	5.9e-06	0	6.11e-06	0	0	0	0	0	0	0	6.16e-06	0	0	3.29e-06	0	0	0	0	0	0	3.73e-06	1.7e-06	0	0	1.3e-05	2.03e-06	8.94e-06	9.23e-06	6.93e-06	7.58e-06	1.2e-05	0	3.14e-06	4.19e-06	0	0	0	0	0	0	0	0	0	0	2.35e-06	0	1.72e-06	0
k__Fungi;p__Ascomycota;c__Dothideomycetes;o__Mycosphaerellales;f__Teratosphaeriaceae;g__Hortaea;s__Hortaea_thailandica	1.43e-06	0	2.81e-06	0	0	0	0	0	0	0	0	0	0	0	0	0	0	0	0	0	0	0	0	0	2.53e-06	0	8.11e-07	1.25e-06	3.56e-06	0	1.43e-06	0	0	0	0	0	0	0	0	0	0	0	0	0	0	0	0	0
k__Fungi;p__Ascomycota;c__Dothideomycetes;o__Mycosphaerellales;f__Teratosphaeriaceae;g__Hortaea;s__Hortaea_werneckii	0	0	0	0	0	0	2.04e-06	0	0	0	0	0	2.87e-06	3.38e-06	0	7.11e-06	0	0	0	0	0	0	0	0	0	0	0	3.61e-06	1.71e-06	1.66e-06	0	3.25e-06	0	4.3e-06	0	0	0	0	0	0	0	2.94e-06	0	0	0	2.33e-06	0	0
k__Fungi;p__Ascomycota;c__Dothideomycetes;o__Myriangiales;f__Elsinoaceae;g__Elsinoe;s__Elsinoe_ampelina	0	0	0	3.53e-06	0	2.14e-06	0	0	0	1.31e-05	2.16e-06	1.7e-06	4.42e-06	0	0	0	2.6e-06	2.23e-06	1.93e-06	1.67e-06	0	0	0	1.53e-06	0	2.14e-06	0	0	0	0	0	3.33e-06	3.31e-06	0	1.75e-06	0	0	0	0	0	0	0	0	2.06e-06	0	0	5.45e-06	0
k__Fungi;p__Ascomycota;c__Dothideomycetes;o__Myriangiales;f__Elsinoaceae;g__Elsinoe;s__Elsinoe_australis	0	0	7.48e-06	0	1.82e-06	5.83e-06	0	0	0	0	0	0	2.9e-06	0	0	5.4e-06	4.52e-06	1.94e-06	1.68e-06	0	0	1.56e-06	2.45e-06	6.64e-06	8.55e-06	1.86e-06	0	0	0	1.68e-06	0	0	0	3.84e-06	0	2.29e-06	0	0	0	0	0	0	0	0	0	4.16e-06	0	0
k__Fungi;p__Ascomycota;c__Dothideomycetes;o__Myriangiales;f__Myriangiaceae;g__Myriangium;s__Myriangium_duriaei	2.14e-06	0	2.11e-06	1.79e-06	0	0	0	0	0	4.43e-06	2.19e-06	0	5.97e-06	0	0	9.25e-06	0	2.26e-06	0	0	1.99e-06	0	0	3.1e-06	0	0	0	1.88e-06	0	1.73e-06	0	0	1.68e-06	0	1.77e-06	0	0	3.35e-06	1.55e-06	0	4.8e-06	0	3.13e-06	4.19e-06	0	0	0	1.98e-06
k__Fungi;p__Ascomycota;c__Dothideomycetes;o__Mytilinidiales;f__Mytilinidiaceae;g__Lophium;s__Lophium_mytilinum	1.73e-06	0	6.83e-06	1.45e-06	0	0	0	3.97e-06	0	1.79e-06	0	4.17e-06	0	0	0	1.5e-06	0	0	0	4.11e-06	0	0	2.04e-06	0	2.37e-06	0	0	3.04e-06	0	2.8e-06	0	0	0	1.81e-06	1.43e-06	2.16e-06	0	1.36e-06	0	0	1.94e-06	9.92e-06	2.53e-06	0	0	1.57e-05	0	1.6e-06
k__Fungi;p__Ascomycota;c__Dothideomycetes;o__Pleosporales;f__Delitschiaceae;g__Delitschia;s__Delitschia_confertaspora	0	7.04e-06	2.17e-06	7.23e-06	0	0	3.43e-06	1.98e-06	1.64e-06	0	3.55e-06	2.78e-06	2.41e-06	0	0	2.99e-06	0	5.48e-06	1.58e-06	1.37e-06	4.84e-06	0	0	2.51e-06	0	5.27e-06	0	1.52e-06	0	5.6e-06	0	1.37e-06	2.72e-06	0	0	2.16e-06	0	0	1.85e-06	2.47e-06	0	0	1.27e-06	8.47e-06	0	0	0	0
k__Fungi;p__Ascomycota;c__Dothideomycetes;o__Pleosporales;f__Periconiaceae;g__Periconia;s__Periconia_macrospinosa	2.2e-06	0	2.17e-06	0	0	0	0	0	4.17e-06	9.11e-06	0	0	0	5.43e-06	2.58e-06	0	1.08e-05	0	0	0	2.05e-06	0	0	1.59e-06	0	2.24e-06	3.75e-06	0	3.66e-06	0	0	0	3.45e-06	4.61e-06	0	0	2.74e-06	0	0	0	0	0	0	0	0	2.49e-06	0	0
k__Fungi;p__Ascomycota;c__Dothideomycetes;o__Pleosporales;f__Phaeosphaeriaceae;g__Setomelanomma;s__Setomelanomma_holmii	3.18e-06	0	4.39e-06	0	0	0	0	0	0	0	0	0	0	0	0	0	0	0	0	0	0	0	0	0	0	0	8.55e-07	0	9.78e-07	6.2e-06	6.89e-06	0	0	0	0	0	0	0	0	0	0	0	0	0	0	0	0	0
k__Fungi;p__Ascomycota;c__Dothideomycetes;o__Pleosporales;f__Pleosporaceae;g__Alternaria;s__Alternaria_alternata	0	0	0	1.79e-06	0	0	0	0	2.03e-06	0	0	0	0	1.76e-06	0	0	2.63e-06	0	0	0	0	1.82e-06	5.04e-06	0	0	0	0	0	1.78e-06	0	0	0	1.68e-06	0	0	0	0	0	0	0	0	0	1.56e-06	8.37e-06	2.52e-06	0	0	0
k__Fungi;p__Ascomycota;c__Dothideomycetes;o__Pleosporales;f__Pleosporaceae;g__Alternaria;s__Alternaria_gaisen	0	0	1.48e-06	0	0	0	0	0	0	0	0	0	0	0	0	0	0	0	0	0	0	0	0	0	0	0	8.5e-07	1.31e-06	2.49e-06	1.21e-06	4.51e-06	0	0	0	0	0	0	0	0	0	0	0	0	0	0	0	0	0
k__Fungi;p__Ascomycota;c__Dothideomycetes;o__Pleosporales;f__Pleosporaceae;g__Bipolaris;s__Bipolaris_oryzae	1.43e-06	0	1.32e-06	0	0	0	0	0	0	0	0	0	0	0	0	0	0	0	0	0	0	0	0	0	4.37e-06	0	6.26e-07	2.17e-06	0	1.01e-06	0	0	0	0	0	0	0	0	0	0	0	0	0	0	0	0	0	0
k__Fungi;p__Ascomycota;c__Dothideomycetes;o__Pleosporales;f__Pleosporaceae;g__Exserohilum;s__Exserohilum_turcicum	0	0	0	0	0	0	0	0	0	0	0	0	0	0	0	0	0	0	0	0	0	0	0	0	1.47e-06	0	6.08e-06	1.88e-06	0	0	4.3e-06	0	0	0	0	0	0	0	0	0	0	0	0	0	0	0	0	0
k__Fungi;p__Ascomycota;c__Dothideomycetes;o__Pleosporales;f__Pleosporaceae;g__Pyrenophora;s__Pyrenophora_tritici-repentis	3.51e-06	2.37e-06	0	0	3.47e-06	0	0	0	2.09e-06	2.28e-06	5.39e-06	1.27e-05	1.01e-05	5.75e-06	8.22e-06	0	2.71e-06	0	2.01e-06	1.39e-06	3.26e-06	2.97e-06	6.72e-06	0	1.51e-06	2.24e-06	7.42e-07	3.83e-06	2.92e-06	4.23e-06	5.7e-06	0	1.37e-06	1.83e-06	5.09e-06	2.19e-06	0	4.47e-06	4.78e-06	5e-06	2.47e-06	5.02e-06	3.84e-06	0	2.59e-06	1.04e-05	6.03e-06	0
k__Fungi;p__Ascomycota;c__Dothideomycetes;o__Pleosporales;f__unclassified;g__Aaosphaeria;s__Aaosphaeria_arxii	1.91e-06	0	0	0	0	0	0	0	0	0	0	0	0	0	0	0	0	0	0	0	0	0	0	0	0	0	0	0	0	4.62e-06	0	0	0	0	0	0	0	0	0	0	0	0	0	0	0	0	0	0
k__Fungi;p__Ascomycota;c__Dothideomycetes;o__Trypetheliales;f__Trypetheliaceae;g__Viridothelium;s__Viridothelium_virens	1.98e-06	0	0	3.3e-06	0	0	0	0	0	0	0	1.59e-06	2.75e-06	0	0	0	2.43e-06	0	0	3.13e-06	0	0	0	0	0	0	1.12e-06	0	3.29e-06	1.6e-06	1.99e-06	9.36e-06	0	0	1.64e-06	0	2.46e-06	0	1.43e-06	5.65e-06	2.22e-06	0	0	0	2.32e-06	0	0	0
k__Fungi;p__Ascomycota;c__Dothideomycetes;o__Venturiales;f__Cylindrosympodiaceae;g__Tothia;s__Tothia_fuscella	0	0	1.33e-06	0	0	0	0	0	0	0	0	0	0	0	0	0	0	0	0	0	0	0	0	0	9.25e-07	0	3.07e-06	0	1.12e-06	1.09e-06	2.72e-06	0	0	0	0	0	0	0	0	0	0	0	0	0	0	0	0	0
k__Fungi;p__Ascomycota;c__Dothideomycetes;o__Venturiales;f__Sympoventuriaceae;g__Verruconis;s__Verruconis_gallopava	0	0	0	0	0	0	0	0	0	0	0	0	0	0	0	0	0	0	0	0	0	0	0	0	2.22e-06	0	1.84e-06	2.85e-06	1.35e-06	1.31e-06	4.89e-06	0	0	0	0	0	0	0	0	0	0	0	0	0	0	0	0	0
k__Fungi;p__Ascomycota;c__Dothideomycetes;o__unclassified;f__unclassified;g__Bonordeniella;s__Coniosporium_apollinis	0	0	0	0	0	0	0	0	0	0	0	0	0	0	0	0	0	0	0	0	0	0	0	0	0	0	3.02e-06	3.11e-06	1.47e-06	0	0	0	0	0	0	0	0	0	0	0	0	0	0	0	0	0	0	0
k__Fungi;p__Ascomycota;c__Dothideomycetes;o__unclassified;f__unclassified;g__Peltaster;s__Peltaster_fructicola	2e-06	0	0	0	0	2.03e-06	0	2.29e-06	0	2.07e-06	4.1e-06	1.61e-06	1.4e-06	0	0	6.92e-06	0	4.22e-06	0	0	0	0	0	0	0	0	2.27e-06	0	0	0	0	1.58e-06	0	4.19e-06	0	2.5e-06	2.49e-06	0	0	0	0	0	0	0	0	0	0	0
k__Fungi;p__Ascomycota;c__Eurotiomycetes;o__Chaetothyriales;f__Cyphellophoraceae;g__Cyphellophora;s__Cyphellophora_europaea	1.47e-06	0	4.34e-06	0	0	0	0	0	0	0	0	0	0	0	0	0	0	0	0	0	0	0	0	0	1e-06	0	1.1e-06	3.52e-06	1.96e-06	0	0	0	0	0	0	0	0	0	0	0	0	0	0	0	0	0	0	0
k__Fungi;p__Ascomycota;c__Eurotiomycetes;o__Chaetothyriales;f__Herpotrichiellaceae;g__Capronia;s__Capronia_epimyces	0	0	0	0	0	0	0	0	0	0	0	0	0	0	0	0	0	0	0	0	0	0	0	0	0	0	3.7e-06	5.51e-07	0	0	2.18e-06	0	0	0	0	0	0	0	0	0	0	0	0	0	0	0	0	0
k__Fungi;p__Ascomycota;c__Eurotiomycetes;o__Chaetothyriales;f__Herpotrichiellaceae;g__Exophiala;s__Exophiala_dermatitidis	0	0	0	0	0	0	0	0	0	0	0	0	0	0	0	0	0	0	0	0	0	0	0	0	9.95e-07	0	0	0	0	4.7e-06	0	0	0	0	0	0	0	0	0	0	0	0	0	0	0	0	0	0
k__Fungi;p__Ascomycota;c__Eurotiomycetes;o__Chaetothyriales;f__Herpotrichiellaceae;g__Exophiala;s__Exophiala_mesophila	0	0	0	1.74e-06	0	0	0	0	0	0	0	0	0	0	0	3.6e-06	0	0	1.9e-06	0	0	0	0	0	1.43e-06	0	0	0	0	0	0	0	0	0	0	1.04e-05	0	0	1.51e-06	0	0	2.98e-06	0	0	0	0	0	0
k__Fungi;p__Ascomycota;c__Eurotiomycetes;o__Chaetothyriales;f__Herpotrichiellaceae;g__Exophiala;s__Exophiala_spinifera	0	0	0	0	0	0	0	0	0	0	0	0	0	0	0	0	0	0	0	0	0	0	0	0	0	0	0	4.12e-06	0	0	0	0	0	0	0	0	0	0	0	0	0	0	0	0	0	0	0	0
k__Fungi;p__Ascomycota;c__Eurotiomycetes;o__Chaetothyriales;f__Herpotrichiellaceae;g__Exophiala;s__Exophiala_xenobiotica	4.43e-06	4.49e-06	3.34e-06	0	1.64e-06	5.04e-06	4.93e-06	5.69e-06	1.1e-05	5.14e-06	1.7e-06	1.46e-05	5.24e-07	8.17e-06	1.17e-05	1.43e-06	6.12e-06	6.99e-06	3.03e-06	0	3.09e-06	2.81e-06	7.81e-06	6e-06	8.84e-06	3.36e-06	7.12e-06	1.83e-06	1.47e-05	5.13e-06	1.64e-05	2.62e-06	5.2e-06	3.47e-06	0	2.07e-06	6.18e-06	0	6e-06	0	5.58e-06	7.12e-06	4.85e-06	4.86e-06	0	0	5.71e-06	3.06e-06
k__Fungi;p__Ascomycota;c__Eurotiomycetes;o__Chaetothyriales;f__Herpotrichiellaceae;g__Fonsecaea;s__Fonsecaea_erecta	2.96e-06	0	2.46e-06	0	0	0	0	0	0	0	0	0	0	0	0	0	0	0	0	0	0	0	0	0	3.81e-06	0	5.13e-06	6.06e-06	3.33e-06	5.37e-06	1.1e-05	0	0	0	0	0	0	0	0	0	0	0	0	0	0	0	0	0
k__Fungi;p__Ascomycota;c__Eurotiomycetes;o__Chaetothyriales;f__Herpotrichiellaceae;g__Fonsecaea;s__Fonsecaea_multimorphosa	0	0	0	0	0	0	0	0	0	0	0	0	0	0	0	0	0	0	0	0	0	0	0	0	0	0	0	0	0	5.12e-06	2.12e-06	0	0	0	0	0	0	0	0	0	0	0	0	0	0	0	0	0
k__Fungi;p__Ascomycota;c__Eurotiomycetes;o__Chaetothyriales;f__Herpotrichiellaceae;g__Phialophora;s__Phialophora_attinorum	0	0	0	0	0	0	0	0	0	0	0	0	0	0	0	0	0	0	0	0	0	0	0	0	0	0	7.66e-06	0	0	0	1.94e-06	0	0	0	0	0	0	0	0	0	0	0	0	0	0	0	0	0
k__Fungi;p__Ascomycota;c__Eurotiomycetes;o__Chaetothyriales;f__unclassified;g__unclassified;s__Chaetothyriales_sp._CBS_134920	0	0	0	0	1.73e-06	1.78e-06	0	0	0	0	5.39e-06	1.41e-06	0	1.01e-05	0	0	2.16e-06	1.11e-05	3.2e-06	0	7.68e-06	0	0	0	0	8.03e-06	2.25e-06	1.54e-06	0	1.42e-06	0	1.38e-06	0	0	0	2.19e-06	5.48e-06	0	2.53e-06	2.5e-06	0	0	1.28e-06	5.58e-06	0	0	1.9e-06	6.1e-06
k__Fungi;p__Ascomycota;c__Eurotiomycetes;o__Eurotiales;f__Aspergillaceae;g__Aspergillus;s__Aspergillus_avenaceus	0	0	1.09e-06	0	0	0	0	0	0	0	0	0	0	0	0	0	0	0	0	0	0	0	0	0	3.01e-06	0	6.26e-07	2.9e-06	9.15e-07	0	0	0	0	0	0	0	0	0	0	0	0	0	0	0	0	0	0	0
k__Fungi;p__Ascomycota;c__Eurotiomycetes;o__Eurotiales;f__Aspergillaceae;g__Aspergillus;s__Aspergillus_clavatus	7.87e-06	0	1.55e-06	0	6.23e-06	4.78e-06	4.68e-06	1.8e-06	0	0	0	0	4.39e-06	3.88e-06	0	0	0	3.32e-06	0	1.24e-06	0	0	1.85e-06	0	0	3.19e-06	0	1.38e-06	1.31e-06	6.36e-06	0	0	4.93e-06	1.65e-06	0	0	0	1.23e-06	2.28e-06	0	3.53e-06	2.25e-06	0	0	0	0	0	0
k__Fungi;p__Ascomycota;c__Eurotiomycetes;o__Eurotiales;f__Aspergillaceae;g__Aspergillus;s__Aspergillus_cristatus	0	0	1.26e-06	0	0	0	0	0	0	0	0	0	0	0	0	0	0	0	0	0	0	0	0	0	8.72e-07	0	2.17e-06	0	1.06e-06	1.03e-06	1.28e-06	0	0	0	0	0	0	0	0	0	0	0	0	0	0	0	0	0
k__Fungi;p__Ascomycota;c__Eurotiomycetes;o__Eurotiales;f__Aspergillaceae;g__Aspergillus;s__Aspergillus_flavus	1.93e-06	6.53e-06	0	4.83e-06	0	0	0	0	0	1.99e-06	1.98e-06	0	1.34e-06	0	0	0	4.74e-06	0	0	0	0	0	2.27e-06	0	0	0	0	0	0	0	0	0	1.51e-06	0	0	0	4.79e-06	0	0	0	4.32e-06	0	0	0	4.53e-06	0	0	0
k__Fungi;p__Ascomycota;c__Eurotiomycetes;o__Eurotiales;f__Aspergillaceae;g__Aspergillus;s__Aspergillus_fumigatiaffinis	5.71e-05	3.3e-05	6.53e-05	8.88e-05	4.54e-05	6.25e-05	6.12e-05	6.42e-05	6.34e-05	5.95e-05	7.49e-05	6.72e-05	3.82e-05	6.5e-05	3.61e-05	5.02e-05	3.34e-05	5.26e-05	4.08e-05	4.63e-05	7.47e-05	6.15e-05	7.82e-05	4.16e-05	4.06e-05	6.6e-05	4.16e-05	5.12e-05	4.13e-05	5.7e-05	7.86e-05	5.25e-05	4.73e-05	6.15e-05	4.98e-05	5.48e-05	8.29e-05	3.6e-05	4.04e-05	7.11e-05	7.01e-05	4.16e-05	6.34e-05	6.56e-05	5.43e-05	5.73e-05	5.97e-05	4.8e-05
k__Fungi;p__Ascomycota;c__Eurotiomycetes;o__Eurotiales;f__Aspergillaceae;g__Aspergillus;s__Aspergillus_fumigatus	3.03e-06	0	0	0	0	0	0	0	0	0	0	0	0	0	0	0	0	0	0	0	0	0	0	0	2.74e-06	0	0	0	0	9.71e-06	2.01e-06	0	0	0	0	0	0	0	0	0	0	0	0	0	0	0	0	0
k__Fungi;p__Ascomycota;c__Eurotiomycetes;o__Eurotiales;f__Aspergillaceae;g__Aspergillus;s__Aspergillus_lentulus	0	0	0	0	0	0	0	0	0	0	0	0	0	0	0	0	0	0	0	0	0	0	0	0	1.1e-06	0	1.82e-06	0	4.01e-06	3.9e-06	1.61e-06	0	0	0	0	0	0	0	0	0	0	0	0	0	0	0	0	0
k__Fungi;p__Ascomycota;c__Eurotiomycetes;o__Eurotiales;f__Aspergillaceae;g__Aspergillus;s__Aspergillus_niger	2.06e-06	0	0	0	0	0	0	0	0	0	0	3.3e-06	0	3.38e-06	0	0	0	0	1.88e-06	0	0	0	0	0	2.81e-06	0	0	0	0	1.66e-06	0	3.25e-06	1.61e-06	0	0	0	0	3.33e-06	4.46e-06	0	0	0	0	0	0	0	0	0
k__Fungi;p__Ascomycota;c__Eurotiomycetes;o__Eurotiales;f__Aspergillaceae;g__Aspergillus;s__Aspergillus_novofumigatus	2.57e-06	4.48e-06	8.44e-07	7.14e-06	2.07e-06	4.77e-06	2.55e-06	8.82e-06	3.92e-06	6.2e-06	4.39e-06	3.41e-06	3.58e-06	2.81e-06	7.04e-06	8.22e-07	7.53e-06	0	8.28e-06	7.28e-06	2.39e-06	3.02e-06	0	2.48e-06	2.34e-06	1.05e-05	0	5.87e-06	4.39e-06	5.05e-06	2.58e-06	2.03e-06	4.39e-06	5.59e-06	2.83e-06	4.28e-06	1.57e-05	0	5.27e-06	5.92e-06	3.24e-06	7.03e-06	4.45e-06	8.37e-07	4.87e-06	6.31e-06	6.01e-06	3.72e-06
k__Fungi;p__Ascomycota;c__Eurotiomycetes;o__Eurotiales;f__Aspergillaceae;g__Aspergillus;s__Aspergillus_rambellii	0	0	0	0	0	0	0	0	0	0	0	0	0	0	0	0	0	0	0	0	0	0	0	0	0	0	2.82e-06	0	1.38e-06	0	0	0	0	0	0	0	0	0	0	0	0	0	0	0	0	0	0	0
k__Fungi;p__Ascomycota;c__Eurotiomycetes;o__Eurotiales;f__Aspergillaceae;g__Aspergillus;s__Aspergillus_sclerotiicarbonarius	0	0	1.97e-06	0	0	0	0	0	0	0	0	0	0	0	0	0	0	0	0	0	0	0	0	0	1.37e-06	0	1.14e-06	0	4.99e-06	3.24e-06	0	0	0	0	0	0	0	0	0	0	0	0	0	0	0	0	0	0
k__Fungi;p__Ascomycota;c__Eurotiomycetes;o__Eurotiales;f__Aspergillaceae;g__Aspergillus;s__Aspergillus_sp._HF37	3.24e-06	0	1.26e-06	0	0	0	0	0	0	0	0	0	0	0	0	0	0	0	0	0	0	0	0	0	2.21e-06	0	2.68e-06	5.68e-06	1.39e-06	0	5.41e-06	0	0	0	0	0	0	0	0	0	0	0	0	0	0	0	0	0
k__Fungi;p__Ascomycota;c__Eurotiomycetes;o__Eurotiales;f__Aspergillaceae;g__Aspergillus;s__Aspergillus_terreus	0	0	1.54e-06	0	0	0	0	0	0	0	0	0	0	0	0	0	0	0	0	0	0	0	0	0	0	0	0	0	3.88e-06	0	0	0	0	0	0	0	0	0	0	0	0	0	0	0	0	0	0	0
k__Fungi;p__Ascomycota;c__Eurotiomycetes;o__Eurotiales;f__Aspergillaceae;g__Aspergillus;s__Aspergillus_transmontanensis	0	0	1.19e-06	0	0	0	0	0	0	0	0	0	0	0	0	0	0	0	0	0	0	0	0	0	1.65e-06	0	9.61e-07	1.06e-06	3e-06	0	3.63e-06	0	0	0	0	0	0	0	0	0	0	0	0	0	0	0	0	0
k__Fungi;p__Ascomycota;c__Eurotiomycetes;o__Eurotiales;f__Aspergillaceae;g__Aspergillus;s__Aspergillus_tubingensis	1.77e-06	0	1.75e-06	0	0	0	0	0	0	0	0	0	0	0	0	0	0	0	0	0	0	0	0	0	1.16e-05	0	8.47e-06	1.75e-05	7.98e-06	6.63e-06	9.92e-06	0	0	0	0	0	0	0	0	0	0	0	0	0	0	0	0	0
k__Fungi;p__Ascomycota;c__Eurotiomycetes;o__Eurotiales;f__Aspergillaceae;g__Aspergillus;s__Aspergillus_turcosus	1.16e-06	0	0	0	0	0	0	0	0	0	0	0	0	0	0	0	0	0	0	0	0	0	0	0	0	0	1.13e-06	1.38e-06	0	5.15e-06	1.41e-06	0	0	0	0	0	0	0	0	0	0	0	0	0	0	0	0	0
k__Fungi;p__Ascomycota;c__Eurotiomycetes;o__Eurotiales;f__Aspergillaceae;g__Penicillium;s__Penicillium_arizonense	0	2.43e-06	3.53e-06	5.99e-06	0	1.82e-06	2.04e-06	2.35e-06	5.1e-06	1.85e-06	0	2.88e-06	1.25e-06	1.69e-06	4.52e-06	3.1e-06	0	0	0	1.42e-06	0	3.27e-06	4.22e-06	2.6e-06	3.68e-06	0	2.34e-06	1.57e-06	0	0	0	1.62e-06	0	1.07e-05	0	0	0	4.62e-06	0	2.56e-06	0	0	0	5.52e-06	2.42e-06	0	0	0
k__Fungi;p__Ascomycota;c__Eurotiomycetes;o__Eurotiales;f__Aspergillaceae;g__Penicillium;s__Penicillium_brasilianum	0	0	0	4.95e-06	3.91e-06	0	7.83e-06	0	0	2.04e-06	0	0	0	3.25e-06	0	0	0	0	0	0	0	0	4.65e-06	0	0	0	0	1.73e-06	0	0	0	0	0	0	1.64e-06	0	0	0	0	0	0	2.83e-06	0	0	0	0	0	0
k__Fungi;p__Ascomycota;c__Eurotiomycetes;o__Eurotiales;f__Aspergillaceae;g__Penicillium;s__Penicillium_camemberti	0	0	4.05e-06	5.15e-06	0	0	1.02e-05	0	0	4.25e-06	2.11e-06	0	0	1.69e-06	0	1.78e-06	0	0	0	0	1.91e-06	1.74e-06	0	2.98e-06	2.81e-06	4.17e-06	0	1.8e-06	0	0	0	0	0	0	0	0	0	1.61e-06	0	0	0	0	1.5e-06	0	2.42e-06	0	0	1.9e-06
k__Fungi;p__Ascomycota;c__Eurotiomycetes;o__Eurotiales;f__Aspergillaceae;g__Penicillium;s__Penicillium_digitatum	0	0	0	9.38e-06	1.59e-06	0	0	0	0	0	1.65e-06	1.29e-06	0	0	3.77e-06	0	0	0	0	1.27e-06	0	1.36e-06	0	1.16e-06	1.1e-06	0	0	0	0	3.9e-06	0	0	0	0	2.66e-06	0	0	0	1.16e-06	0	0	0	1.17e-06	3.14e-06	0	1.82e-06	1.38e-06	0
k__Fungi;p__Ascomycota;c__Eurotiomycetes;o__Eurotiales;f__Aspergillaceae;g__Penicillium;s__Penicillium_subrubescens	0	0	0	0	0	0	0	0	0	0	0	3.39e-06	2.94e-06	1.73e-06	2.48e-06	0	0	2.23e-06	0	0	0	3.58e-06	0	0	1.45e-06	2.14e-06	3.6e-06	0	0	0	0	0	0	0	0	0	0	0	0	0	0	3.02e-06	1.54e-06	0	0	0	0	1.95e-06
k__Fungi;p__Ascomycota;c__Eurotiomycetes;o__Eurotiales;f__Aspergillaceae;g__Penicillium;s__Penicillium_vulpinum	0	0	0	0	2.03e-06	0	4.07e-06	4.71e-06	1.95e-06	0	2.11e-06	0	0	0	2.41e-06	0	0	0	0	1.63e-06	0	3.49e-06	4.84e-06	0	0	0	1.17e-06	1.8e-06	0	0	0	0	1.61e-06	2.15e-06	1.7e-06	2.57e-06	1.02e-05	0	0	0	0	0	0	0	0	0	0	1.9e-06
k__Fungi;p__Ascomycota;c__Eurotiomycetes;o__Eurotiales;f__Thermoascaceae;g__Byssochlamys;s__Byssochlamys_spectabilis	0	0	0	0	0	0	0	0	0	0	0	0	0	0	0	0	0	0	0	0	0	0	0	0	0	0	5.58e-06	2.48e-06	2.55e-06	4.93e-06	4.47e-06	0	0	0	0	0	0	0	0	0	0	0	0	0	0	0	0	0
k__Fungi;p__Ascomycota;c__Eurotiomycetes;o__Eurotiales;f__Trichocomaceae;g__Talaromyces;s__Talaromyces_stipitatus	0	0	0	0	0	0	0	0	0	0	0	0	0	0	0	0	0	0	0	0	0	0	0	0	0	0	0	0	0	0	0	0	0	2.02e-06	6.38e-06	0	2.4e-06	0	0	0	0	0	0	0	0	0	0	0
k__Fungi;p__Ascomycota;c__Eurotiomycetes;o__Eurotiales;f__Trichocomaceae;g__Thermomyces;s__Thermomyces_lanuginosus	3.66e-06	0	2.96e-06	0	0	0	0	0	0	0	0	0	0	0	0	0	0	0	0	0	0	0	0	0	7.09e-06	0	5.96e-06	1.26e-06	6.18e-06	4.16e-06	1.11e-05	0	0	0	0	0	0	0	0	0	0	0	0	0	0	0	0	0
k__Fungi;p__Ascomycota;c__Eurotiomycetes;o__Onygenales;f__Ajellomycetaceae;g__Blastomyces;s__Blastomyces_percursus	0	1.49e-06	0	0	0	4.47e-06	2.18e-06	2.52e-06	0	0	0	1.77e-06	0	1.81e-06	0	0	0	9.29e-06	0	0	0	0	2.59e-06	0	0	0	2.5e-06	1.93e-06	0	0	0	0	0	2.3e-06	0	0	0	0	0	3.15e-06	2.47e-06	0	0	0	0	0	0	0
k__Fungi;p__Ascomycota;c__Eurotiomycetes;o__Onygenales;f__Ajellomycetaceae;g__Emmonsia;s__Emmonsia_sp._CAC-2015a	0	0	0	0	0	0	0	0	0	0	0	0	0	0	0	0	0	0	0	0	0	0	0	0	1.11e-06	0	0	0	0	5.25e-06	1.63e-06	0	0	0	0	0	0	0	0	0	0	0	0	0	0	0	0	0
k__Fungi;p__Ascomycota;c__Eurotiomycetes;o__Onygenales;f__Arthrodermataceae;g__Trichophyton;s__Trichophyton_interdigitale	0	0	0	0	0	0	0	0	0	0	0	0	0	0	0	0	0	0	0	0	0	0	0	0	0	0	5.21e-07	0	0	2.97e-06	9.22e-07	0	0	0	0	0	0	0	0	0	0	0	0	0	0	0	0	0
k__Fungi;p__Ascomycota;c__Eurotiomycetes;o__Onygenales;f__Arthrodermataceae;g__Trichophyton;s__Trichophyton_mentagrophytes	0	0	0	0	0	0	0	0	0	0	0	0	0	0	0	0	0	0	0	0	0	0	0	0	0	0	3.86e-06	0	1.88e-06	3.67e-06	0	0	0	0	0	0	0	0	0	0	0	0	0	0	0	0	0	0
k__Fungi;p__Ascomycota;c__Eurotiomycetes;o__Verrucariales;f__Verrucariaceae;g__Endocarpon;s__Endocarpon_pusillum	4.68e-06	0	0	3.1e-06	0	0	0	0	0	0	0	0	0	1.53e-06	0	0	0	5.88e-06	1.02e-05	0	0	1.58e-06	0	1.34e-06	5.2e-06	0	8.86e-07	8.94e-06	1.18e-06	2.2e-06	0	0	0	0	0	0	0	0	0	0	0	0	0	0	0	0	0	1.72e-06
k__Fungi;p__Ascomycota;c__Lecanoromycetes;o__Lecanorales;f__Parmeliaceae;g__Letharia;s__Letharia_columbiana	0	0	0	0	1.93e-06	0	1.93e-06	0	0	0	0	0	0	0	0	0	0	6.17e-06	0	0	0	1.66e-06	0	0	0	0	0	5.14e-06	0	1.58e-06	0	1.54e-06	0	0	0	0	0	0	1.41e-06	0	0	2.79e-06	0	0	0	0	0	1.8e-06
k__Fungi;p__Ascomycota;c__Lecanoromycetes;o__Lecanorales;f__Parmeliaceae;g__Letharia;s__Letharia_lupina	1.64e-06	0	0	0	0	0	0	1.88e-06	7.8e-06	1.7e-06	0	0	0	0	1.92e-06	1.42e-06	2.02e-06	3.46e-06	1.5e-06	2.59e-06	3.05e-06	0	0	1.19e-06	1.12e-06	0	0	1.44e-06	0	1.33e-06	1.65e-06	1.29e-06	0	3.43e-06	0	2.05e-06	0	1.28e-06	0	0	0	2.35e-06	0	0	1.93e-06	0	0	1.51e-06
k__Fungi;p__Ascomycota;c__Leotiomycetes;o__Erysiphales;f__Erysiphaceae;g__Erysiphe;s__Erysiphe_necator	0	0	0	0	0	0	0	0	0	0	0	0	0	0	0	0	0	0	0	0	0	0	0	0	0	0	0	0	0	5.05e-06	0	0	0	0	0	0	0	0	0	0	0	0	0	0	0	0	0	0
k__Fungi;p__Ascomycota;c__Leotiomycetes;o__Erysiphales;f__Erysiphaceae;g__Golovinomyces;s__Golovinomyces_cichoracearum	0	0	0	0	0	0	0	0	0	0	0	0	0	0	0	0	0	0	0	0	0	0	0	0	0	0	0	0	0	0	0	0	0	1.83e-06	4.35e-06	0	0	0	0	0	0	0	0	0	0	0	0	0
k__Fungi;p__Ascomycota;c__Leotiomycetes;o__Erysiphales;f__Erysiphaceae;g__Golovinomyces;s__Golovinomyces_magnicellulatus	2.97e-06	1.45e-06	0	0	6.36e-06	0	0	0	0	2.21e-06	0	0	0	0	0	0	0	0	0	1.69e-06	5.98e-06	0	0	0	3.04e-06	0	4.42e-06	0	3.8e-06	6.09e-06	1.61e-06	0	0	0	0	0	0	0	0	0	0	3.07e-06	0	0	0	0	0	0
k__Fungi;p__Ascomycota;c__Leotiomycetes;o__Helotiales;f__Chlorociboriaceae;g__Chlorociboria;s__Chlorociboria_aeruginascens	0	0	1.5e-06	0	3.02e-06	1.55e-06	1.51e-06	0	0	0	6.26e-06	0	4.26e-06	5.01e-06	1.79e-06	1.32e-06	0	0	1.39e-06	0	1.42e-06	0	0	0	2.09e-06	0	0	0	0	3.7e-06	0	2.41e-06	3.59e-06	0	0	1.91e-06	0	0	1.1e-06	0	0	2.19e-06	3.35e-06	2.98e-06	0	1.73e-06	0	0
k__Fungi;p__Ascomycota;c__Leotiomycetes;o__Helotiales;f__Dermateaceae;g__Marssonina;s__Marssonina_brunnea	1.11e-06	0	0	0	0	0	0	0	0	0	0	8.91e-07	0	0	0	0	0	0	0	0	0	0	0	0	1.95e-06	0	2.97e-06	5.84e-06	9.22e-07	2.69e-06	1.61e-06	0	0	0	0	0	0	0	0	0	0	0	0	0	0	0	0	0
k__Fungi;p__Ascomycota;c__Leotiomycetes;o__Helotiales;f__Lachnaceae;g__Lachnellula;s__Lachnellula_suecica	2.17e-06	0	4.28e-06	1.81e-06	0	4.4e-06	2.15e-06	1.24e-05	0	2.24e-06	0	1.74e-06	3.03e-06	1.78e-06	1.02e-05	0	8.01e-06	0	1.98e-06	1.72e-06	0	5.53e-06	0	0	0	0	2.47e-06	5.72e-06	3.61e-06	1.76e-06	0	1.71e-06	5.11e-06	0	0	0	0	0	0	0	0	0	0	2.12e-06	0	0	0	0
k__Fungi;p__Ascomycota;c__Leotiomycetes;o__Helotiales;f__Leotiaceae;g__Pezoloma;s__Pezoloma_ericae	0	0	0	0	0	0	0	0	0	0	0	0	0	0	0	0	0	0	0	0	0	0	0	0	0	1.78e-06	0	0	0	0	0	0	0	6.55e-06	1.88e-06	2.19e-06	7.69e-06	0	0	0	0	0	0	0	0	0	0	0
k__Fungi;p__Ascomycota;c__Leotiomycetes;o__Helotiales;f__Rutstroemiaceae;g__Rutstroemia;s__Rutstroemia_sp._NJR-2017a_WRK4	5.35e-06	0	2.81e-06	0	0	0	0	0	0	0	0	0	0	0	0	0	0	0	0	0	0	0	0	0	5.12e-06	0	4.25e-06	4.69e-06	4.44e-06	3.45e-06	5.36e-06	0	0	0	0	0	0	0	0	0	0	0	0	0	0	0	0	0
k__Fungi;p__Ascomycota;c__Leotiomycetes;o__Helotiales;f__Sclerotiniaceae;g__Botrytis;s__Botrytis_porri	1.52e-06	0	2e-06	0	0	0	0	0	0	0	0	0	0	0	0	0	0	0	0	0	0	0	0	0	3.12e-06	0	5.19e-06	1.78e-06	5.06e-06	2.46e-06	6.11e-06	0	0	0	0	0	0	0	0	0	0	0	0	0	0	0	0	0
k__Fungi;p__Ascomycota;c__Leotiomycetes;o__Helotiales;f__Sclerotiniaceae;g__Monilinia;s__Monilinia_fructigena	0	0	8.56e-07	0	0	0	0	0	0	0	0	0	0	0	0	0	0	0	0	0	0	0	0	0	0	0	4.24e-06	1.1e-06	3.89e-06	3.53e-06	0	0	0	0	0	0	0	0	0	0	0	0	0	0	0	0	0	0
k__Fungi;p__Ascomycota;c__Leotiomycetes;o__Helotiales;f__unclassified;g__Cadophora;s__Cadophora_sp._DSE1049	2.94e-06	0	0	0	0	0	0	0	0	0	0	0	0	0	0	0	0	0	0	0	0	0	0	0	2.59e-06	0	2.76e-06	0	4.88e-06	4.25e-06	6.13e-06	0	0	0	0	0	0	0	0	0	0	0	0	0	0	0	0	0
k__Fungi;p__Ascomycota;c__Leotiomycetes;o__Helotiales;f__unclassified;g__Rhynchosporium;s__Rhynchosporium_commune	5.65e-06	0	0	0	0	0	0	0	0	0	0	0	0	0	0	0	0	0	0	0	0	0	0	0	4.3e-06	0	8.56e-07	0	2.77e-06	3.76e-06	1.11e-06	0	0	0	0	0	0	0	0	0	0	0	0	0	0	0	0	0
k__Fungi;p__Ascomycota;c__Leotiomycetes;o__unclassified;f__unclassified;g__Scytalidium;s__Scytalidium_lignicola	0	0	0	0	0	0	0	0	0	0	0	0	0	0	0	0	0	0	0	0	0	0	0	0	1.03e-06	0	8.59e-07	1.33e-06	2.51e-06	1.22e-06	3.8e-06	0	0	0	0	0	0	0	0	0	0	0	0	0	0	0	0	0
k__Fungi;p__Ascomycota;c__Neolectomycetes;o__Neolectales;f__Neolectaceae;g__Neolecta;s__Neolecta_irregularis	8.18e-06	3.81e-06	2.72e-05	8.19e-06	8.55e-06	1.26e-05	5.15e-06	8.78e-06	1.46e-05	4.43e-06	7.53e-06	5.85e-06	7.08e-06	3.89e-06	1.99e-06	8.01e-06	2.08e-06	8.25e-06	9.39e-06	1.34e-05	1.78e-05	6.34e-06	1.99e-06	5.66e-06	8.97e-06	1.06e-05	8.15e-06	1.25e-05	4.9e-06	8.19e-06	1.63e-05	1.56e-05	9.92e-06	1.54e-05	9.4e-06	1.34e-05	2.44e-05	4.43e-06	3.68e-06	7.26e-06	1.9e-06	5.02e-06	1.24e-06	0	0	1.02e-05	1.46e-06	6.31e-06
k__Fungi;p__Ascomycota;c__Orbiliomycetes;o__Orbiliales;f__Orbiliaceae;g__Arthrobotrys;s__Arthrobotrys_flagrans	3.8e-06	0	5.24e-06	0	0	0	0	0	0	0	0	0	0	0	0	0	0	0	0	0	0	0	0	0	7.8e-06	0	9.06e-06	9.33e-06	5.68e-06	7.37e-06	1.14e-05	0	0	0	0	0	0	0	0	0	0	0	0	0	0	0	0	0
k__Fungi;p__Ascomycota;c__Orbiliomycetes;o__Orbiliales;f__Orbiliaceae;g__Arthrobotrys;s__Arthrobotrys_oligospora	3.09e-06	0	2.05e-06	5.22e-06	0	2.11e-06	2.06e-06	7.15e-06	1.97e-06	6.46e-06	2.14e-06	8.12e-06	0	6.84e-06	0	0	2.56e-06	0	0	1.65e-06	0	1.77e-06	0	3.02e-06	0	2.11e-06	0	0	0	0	0	2.18e-06	0	0	0	0	7.77e-06	0	1.51e-06	0	0	0	3.04e-06	2.04e-06	0	0	0	0
k__Fungi;p__Ascomycota;c__Orbiliomycetes;o__Orbiliales;f__Orbiliaceae;g__Dactylella;s__Dactylella_cylindrospora	0	0	0	0	1.96e-06	2e-06	1.96e-06	0	0	4.09e-06	2.03e-06	0	0	4.87e-06	2.32e-06	0	0	0	1.8e-06	0	0	0	0	2.86e-06	0	0	0	0	0	0	5.96e-06	0	0	0	0	0	0	1.55e-06	1.43e-06	0	0	0	2.89e-06	1.93e-06	0	2.24e-06	0	0
k__Fungi;p__Ascomycota;c__Orbiliomycetes;o__Orbiliales;f__Orbiliaceae;g__Drechslerella;s__Drechslerella_stenobrocha	0	0	0	0	0	0	6.64e-06	0	2.12e-06	9.24e-06	0	0	0	0	2.62e-06	0	0	0	0	0	0	0	0	0	1.53e-06	0	1.27e-06	0	0	0	0	0	0	0	0	0	0	0	0	0	0	0	1.63e-06	0	0	0	0	0
k__Fungi;p__Ascomycota;c__Pezizomycetes;o__Pezizales;f__Ascobolaceae;g__Ascobolus;s__Ascobolus_immersus	0	0	0	0	0	0	0	0	0	0	0	0	0	0	0	0	0	0	0	0	0	0	0	0	3.1e-06	0	0	5.97e-06	0	0	2.28e-06	0	0	0	0	0	0	0	0	0	0	0	0	0	0	0	0	0
k__Fungi;p__Ascomycota;c__Pezizomycetes;o__Pezizales;f__Ascodesmidaceae;g__Ascodesmis;s__Ascodesmis_nigricans	4.72e-06	1.94e-06	2.82e-06	5.25e-06	2.54e-06	1.59e-06	7.79e-06	0	0	1.63e-06	0	1.03e-06	0	3.88e-06	1.85e-06	2.47e-06	1.58e-06	1.66e-06	1.17e-06	3.73e-06	1.47e-06	3.52e-06	1.85e-06	0	1.08e-06	1.3e-06	0	0	1.07e-06	0	1.29e-06	1.24e-06	0	0	1.3e-06	0	1.96e-06	4.02e-06	1.86e-06	6.74e-06	0	0	1.88e-06	0	0	0	4.92e-06	2.64e-06
k__Fungi;p__Ascomycota;c__Pezizomycetes;o__Pezizales;f__Morchellaceae;g__Morchella;s__Morchella_conica	2.11e-06	0	2.08e-06	7.46e-06	0	0	0	0	0	0	0	0	1.56e-06	0	0	1.93e-06	0	0	0	0	8.32e-06	0	0	0	0	0	3.6e-06	0	0	0	6.36e-06	0	0	0	0	0	0	0	0	6.38e-06	7.52e-06	0	0	0	0	2.53e-06	0	2.06e-06
k__Fungi;p__Ascomycota;c__Pezizomycetes;o__Pezizales;f__Pyronemataceae;g__Pyronema;s__Pyronema_omphalodes	0	0	1.9e-06	1.61e-06	1.91e-06	5.86e-06	3.82e-06	0	1.83e-06	0	0	6.19e-06	0	0	0	1.67e-06	0	0	1.76e-06	6.1e-06	0	0	4.54e-06	5.58e-06	0	1.96e-06	4.38e-06	0	4.81e-06	1.56e-06	5.81e-06	0	1.51e-06	0	4.78e-06	0	4.79e-06	0	1.39e-06	0	2.16e-06	0	2.82e-06	1.88e-06	0	0	0	0
k__Fungi;p__Ascomycota;c__Pezizomycetes;o__Pezizales;f__Pyronemataceae;g__Sphaerosporella;s__Sphaerosporella_brunnea	0	0	0	0	0	0	1.5e-06	0	2.86e-06	0	0	0	1.05e-06	0	0	0	0	3.19e-06	0	2.39e-06	1.41e-06	1.28e-06	0	0	0	1.53e-06	0	1.33e-06	0	0	0	0	4.74e-06	0	0	0	0	1.18e-06	3.28e-06	0	0	0	0	2.96e-06	0	0	1.3e-06	1.4e-06
k__Fungi;p__Ascomycota;c__Pezizomycetes;o__Pezizales;f__Tuberaceae;g__Choiromyces;s__Choiromyces_venosus	1.73e-06	1.17e-06	0	0	0	0	3.43e-06	0	0	0	3.55e-06	0	0	1.42e-06	2.03e-06	0	0	1.83e-06	0	0	1.61e-06	2.94e-06	0	0	7.11e-06	0	9.84e-07	3.04e-06	4.32e-06	0	0	4.1e-06	5.43e-06	0	1.43e-06	2.16e-06	4.31e-06	0	3.76e-06	0	0	0	1.27e-06	0	0	0	0	0
k__Fungi;p__Ascomycota;c__Pezizomycetes;o__Pezizales;f__Tuberaceae;g__Tuber;s__Tuber_borchii	1.7e-06	0	0	0	0	1.72e-06	5.04e-06	1.94e-06	0	1.23e-05	0	0	0	0	1.99e-06	0	2.08e-06	0	4.64e-06	1.34e-06	1.58e-06	0	0	2.45e-06	1.16e-06	0	0	0	0	0	0	0	0	0	1.4e-06	0	0	1.33e-06	0	0	1.9e-06	0	3.71e-06	0	1.99e-06	0	0	0
k__Fungi;p__Ascomycota;c__Pezizomycetes;o__Pezizales;f__Tuberaceae;g__Tuber;s__Tuber_magnatum	0	0	1.53e-06	0	0	2.14e-06	2.09e-06	0	0	0	0	0	0	0	0	0	0	0	0	0	0	0	7.46e-06	0	2.12e-06	0	1.32e-06	1.36e-06	1.29e-06	5.01e-06	1.56e-06	1.67e-06	1.66e-06	0	0	0	2.63e-06	0	0	0	0	0	0	6.19e-06	0	0	0	1.95e-06
k__Fungi;p__Ascomycota;c__Pneumocystidomycetes;o__Pneumocystidales;f__Pneumocystidaceae;g__Pneumocystis;s__Pneumocystis_carinii	2.06e-06	0	2.03e-06	0	0	0	0	0	2.03e-06	0	2.19e-06	3.44e-06	0	5.27e-06	2.51e-06	0	0	0	0	1.69e-06	3.99e-06	1.82e-06	0	0	2.45e-06	0	1.17e-06	1.51e-05	5e-06	3.32e-06	1.53e-06	0	0	4.48e-06	0	0	0	0	0	0	4.8e-06	6.13e-06	0	2.09e-06	2.52e-06	2.42e-06	3.69e-06	1.98e-06
k__Fungi;p__Ascomycota;c__Pneumocystidomycetes;o__Pneumocystidales;f__Pneumocystidaceae;g__Pneumocystis;s__Pneumocystis_jirovecii	1.22e-06	1.45e-06	5.59e-06	0	0	4.34e-06	0	0	0	2.21e-06	4.39e-06	0	0	0	0	0	0	0	0	0	0	5.45e-06	0	0	5.76e-06	0	6.91e-06	4.54e-06	3.68e-06	5.69e-06	6.43e-06	0	0	0	0	0	0	0	0	0	0	0	0	0	0	0	3.69e-06	1.98e-06
k__Fungi;p__Ascomycota;c__Pneumocystidomycetes;o__Pneumocystidales;f__Pneumocystidaceae;g__Pneumocystis;s__Pneumocystis_murina	1.98e-06	0	1.57e-06	0	0	1e-05	1.96e-06	0	3.75e-06	0	0	0	0	0	0	0	0	0	7.22e-06	0	0	0	0	0	2.88e-06	0	2.18e-06	0	2.64e-06	2.57e-06	0	0	0	0	0	0	0	1.55e-06	0	0	2.22e-06	0	0	0	0	0	1.7e-06	0
k__Fungi;p__Ascomycota;c__Saccharomycetes;o__Saccharomycetales;f__Ascoideaceae;g__Ascoidea;s__Ascoidea_rubescens	5.43e-06	2.86e-06	1.04e-05	0	0	0	0	4.83e-06	4e-06	0	0	1.7e-06	0	0	0	0	0	0	0	0	1.97e-06	0	0	3.06e-06	0	0	0	1.36e-05	3.13e-06	3.05e-06	1.67e-06	1.67e-06	1.66e-06	0	0	0	0	3.31e-06	0	0	2.37e-06	0	0	6.19e-06	0	0	0	3.9e-06
k__Fungi;p__Ascomycota;c__Saccharomycetes;o__Saccharomycetales;f__Debaryomycetaceae;g__Candida;s__Candida_albicans	0	0	0	0	0	0	0	0	0	0	0	1.82e-06	4.24e-06	1.86e-06	0	0	0	0	2.07e-06	0	0	0	5.34e-06	0	0	0	2.89e-06	0	3.18e-06	4.84e-06	1.07e-05	0	0	2.37e-06	0	0	2.82e-06	0	0	0	0	0	0	0	2.67e-06	1.03e-05	0	0
k__Fungi;p__Ascomycota;c__Saccharomycetes;o__Saccharomycetales;f__Debaryomycetaceae;g__Candida;s__Candida_orthopsilosis	0	0	0	1.87e-06	2.21e-06	0	0	0	0	0	0	5.38e-06	1.56e-06	0	0	0	0	0	0	0	0	0	2.63e-06	0	1.53e-06	2.27e-06	8.88e-06	0	0	0	0	1.76e-06	0	0	0	0	0	0	0	3.19e-06	0	0	1.63e-06	0	0	2.53e-06	0	0
k__Fungi;p__Ascomycota;c__Saccharomycetes;o__Saccharomycetales;f__Debaryomycetaceae;g__Candida;s__Candida_tropicalis	2.14e-06	0	0	0	0	2.17e-06	4.24e-06	0	0	0	2.19e-06	0	0	0	0	0	0	0	0	0	0	0	0	0	0	0	6.08e-06	1.88e-06	0	0	0	3.38e-06	0	0	1.77e-06	2.68e-06	0	0	0	0	0	3.07e-06	1.56e-06	0	2.52e-06	0	0	0
k__Fungi;p__Ascomycota;c__Saccharomycetes;o__Saccharomycetales;f__Debaryomycetaceae;g__Candida;s__Candida_viswanathii	0	0	0	0	0	0	0	0	0	0	0	0	0	0	0	0	0	0	0	0	0	0	0	0	5.22e-06	0	4.94e-06	1.44e-06	0	1.33e-06	8.24e-07	0	0	0	0	0	0	0	0	0	0	0	0	0	0	0	0	0
k__Fungi;p__Ascomycota;c__Saccharomycetes;o__Saccharomycetales;f__Debaryomycetaceae;g__Lodderomyces;s__Lodderomyces_elongisporus	0	0	0	0	0	0	0	0	0	0	0	0	0	0	0	0	0	0	0	0	0	0	0	0	6.09e-06	0	1.68e-06	3.9e-06	0	0	1.49e-06	0	0	0	0	0	0	0	0	0	0	0	0	0	0	0	0	0
k__Fungi;p__Ascomycota;c__Saccharomycetes;o__Saccharomycetales;f__Debaryomycetaceae;g__Suhomyces;s__Suhomyces_tanzawaensis	0	2.25e-06	3.27e-06	0	3.28e-06	3.36e-06	0	0	0	3.43e-06	0	0	0	1.36e-06	0	2.87e-06	0	1.75e-06	1.51e-06	0	1.54e-06	7.03e-06	0	0	3.4e-06	0	9.42e-07	0	0	0	1.67e-06	0	1.3e-06	0	1.37e-06	2.07e-06	1.03e-05	2.6e-06	2.4e-06	0	0	0	1.21e-06	3.24e-06	0	1.88e-06	1.43e-06	1.53e-06
k__Fungi;p__Ascomycota;c__Saccharomycetes;o__Saccharomycetales;f__Debaryomycetaceae;g__Yamadazyma;s__Yamadazyma_tenuis	2.3e-06	3.12e-06	0	0	0	0	0	2.63e-06	1.09e-05	0	0	3.7e-06	0	0	2.7e-06	0	0	0	0	0	2.14e-06	0	0	0	0	7.01e-06	0	2.02e-06	0	0	2.31e-06	0	0	0	0	0	0	0	0	3.29e-06	0	0	0	0	0	2.61e-06	1.98e-06	2.13e-06
k__Fungi;p__Ascomycota;c__Saccharomycetes;o__Saccharomycetales;f__Dipodascaceae;g__Galactomyces;s__Galactomyces_reessii	2.97e-06	0	1.46e-06	0	0	0	0	0	0	0	0	0	0	0	0	0	0	0	0	0	0	0	0	0	2.03e-06	0	8.42e-07	1.3e-06	2.46e-06	2.4e-06	4.47e-06	0	0	0	0	0	0	0	0	0	0	0	0	0	0	0	0	0
k__Fungi;p__Ascomycota;c__Saccharomycetes;o__Saccharomycetales;f__Dipodascaceae;g__Geotrichum;s__Geotrichum_candidum	3.67e-06	0	1.81e-06	1.67e-06	3.86e-06	2.03e-06	0	0	0	0	2.05e-06	0	0	0	4.47e-06	0	2.34e-06	0	0	6.1e-06	1.77e-06	0	0	1.45e-06	2.51e-06	0	4.21e-06	1.61e-06	0	1.48e-06	7.54e-06	1.58e-06	0	3.98e-06	1.57e-06	0	2.37e-06	0	0	0	2.25e-06	0	0	0	2.24e-06	0	0	1.47e-05
k__Fungi;p__Ascomycota;c__Saccharomycetes;o__Saccharomycetales;f__Dipodascaceae;g__Yarrowia;s__Yarrowia_lipolytica	1.08e-05	1.32e-06	5.68e-06	1.63e-06	5.6e-06	5.63e-06	5.51e-06	1.27e-05	1.85e-06	2.31e-06	2.11e-06	0	6.18e-06	6.49e-06	4.91e-06	5.15e-06	1.51e-05	1.18e-05	5.6e-06	1.63e-06	4.63e-06	4.22e-06	4.25e-06	1.49e-06	1.44e-05	1.5e-05	1.76e-05	1.5e-05	1.15e-05	2.1e-05	1.33e-05	0	2.6e-06	4.08e-06	1.85e-06	2.57e-06	0	4.35e-06	4.3e-06	2.94e-06	3.72e-06	6.14e-06	6.12e-06	0	2.42e-06	3.75e-06	1.77e-06	1.53e-06
k__Fungi;p__Ascomycota;c__Saccharomycetes;o__Saccharomycetales;f__Lipomycetaceae;g__Lipomyces;s__Lipomyces_starkeyi	1.25e-05	0	2.2e-06	1.89e-06	4.42e-06	2.3e-06	0	5.19e-06	0	0	0	1.7e-06	3.11e-06	0	2.62e-06	0	0	1.85e-05	0	0	0	0	0	1.53e-06	0	0	1.09e-06	5.94e-06	1.6e-06	0	4.55e-06	1.76e-06	0	0	5.5e-06	0	0	1.37e-05	1.64e-06	6.25e-06	2.51e-06	0	1.66e-06	0	2.63e-06	0	1.82e-06	0
k__Fungi;p__Ascomycota;c__Saccharomycetes;o__Saccharomycetales;f__Metschnikowiaceae;g__Clavispora;s__Clavispora_lusitaniae	6.24e-06	2.39e-06	1.33e-06	5.88e-06	0	0	4.83e-06	1.55e-06	0	1.4e-06	5.84e-06	0	8.48e-06	2.89e-06	1.59e-06	5.85e-06	4.99e-06	1.43e-06	0	0	0	3.69e-06	9.26e-06	5.49e-06	2.78e-06	5.78e-06	8.01e-06	1.86e-05	1.07e-05	7.25e-06	9.83e-06	3.32e-06	1.11e-05	8.74e-06	1.35e-05	1.04e-05	1.38e-05	1.06e-06	7.26e-06	0	4.87e-06	1.94e-06	9.88e-07	6.09e-06	4.77e-06	2.46e-06	1.16e-06	2.5e-06
k__Fungi;p__Ascomycota;c__Saccharomycetes;o__Saccharomycetales;f__Metschnikowiaceae;g__Clavispora;s__[Candida]_intermedia	0	0	1.17e-06	0	0	2.33e-06	0	0	0	0	0	0	0	0	0	0	0	0	0	3.64e-06	0	0	0	0	5.68e-06	2.34e-06	2.02e-06	7.22e-06	9.86e-07	4.68e-06	3.57e-06	0	0	0	3.81e-06	2.87e-06	0	0	1.66e-06	0	0	0	8.41e-06	0	0	0	0	0
k__Fungi;p__Ascomycota;c__Saccharomycetes;o__Saccharomycetales;f__Metschnikowiaceae;g__Metschnikowia;s__Metschnikowia_aff._pulcherrima	0	0	2.17e-06	0	0	0	0	0	0	0	0	0	0	0	0	7.62e-06	0	0	0	1.74e-06	0	0	2.59e-06	1.59e-06	0	0	0	0	0	0	0	0	0	0	0	0	1.37e-05	0	0	0	0	0	0	0	0	0	0	2.03e-06
k__Fungi;p__Ascomycota;c__Saccharomycetes;o__Saccharomycetales;f__Metschnikowiaceae;g__Metschnikowia;s__Metschnikowia_sp._JCM_33374	3.49e-06	0	1.72e-06	0	0	0	0	0	0	0	0	0	0	0	0	0	0	0	0	0	0	0	0	0	4.17e-06	0	4.95e-07	1.53e-06	1.45e-06	3.52e-06	2.62e-06	0	0	0	0	0	0	0	0	0	0	0	0	0	0	0	0	0
k__Fungi;p__Ascomycota;c__Saccharomycetes;o__Saccharomycetales;f__Phaffomycetaceae;g__Cyberlindnera;s__Cyberlindnera_fabianii	2.77e-06	0	2.51e-06	0	0	0	0	0	0	0	0	0	0	0	0	0	0	0	0	0	0	0	0	0	8.65e-06	0	4.63e-06	4.86e-06	4.23e-06	7.67e-06	8.82e-06	0	0	0	0	0	0	0	0	0	0	0	0	0	0	0	0	0
k__Fungi;p__Ascomycota;c__Saccharomycetes;o__Saccharomycetales;f__Phaffomycetaceae;g__Komagataella;s__Komagataella_pastoris	6.26e-06	0	0	0	0	0	0	0	0	0	0	0	0	0	0	0	0	0	0	0	0	0	0	0	0	0	0	0	0	0	0	0	0	0	0	0	0	0	0	0	0	0	0	0	0	0	0	0
k__Fungi;p__Ascomycota;c__Saccharomycetes;o__Saccharomycetales;f__Phaffomycetaceae;g__Wickerhamomyces;s__Wickerhamomyces_anomalus	2.79e-06	0	3.38e-06	0	0	0	0	0	0	0	0	0	0	0	0	0	0	0	0	0	0	0	0	0	6.79e-06	0	5.96e-06	0	0	0	1.08e-06	0	0	0	0	0	0	0	0	0	0	0	0	0	0	0	0	0
k__Fungi;p__Ascomycota;c__Saccharomycetes;o__Saccharomycetales;f__Phaffomycetaceae;g__Wickerhamomyces;s__Wickerhamomyces_ciferrii	0	0	0	5.29e-06	0	0	0	0	0	0	0	0	0	0	0	7.3e-06	0	0	0	0	0	0	0	0	0	4.29e-06	1.2e-06	0	1.76e-06	0	2.12e-06	1.67e-06	0	0	0	0	0	0	0	0	0	0	0	0	0	0	0	0
k__Fungi;p__Ascomycota;c__Saccharomycetes;o__Saccharomycetales;f__Pichiaceae;g__Brettanomyces;s__Brettanomyces_bruxellensis	0	0	5.07e-06	0	0	0	0	0	0	0	0	0	0	0	0	0	0	0	0	0	0	0	0	0	0	0	1.45e-06	3.01e-06	3.44e-06	1.39e-06	0	0	0	0	0	0	0	0	0	0	0	0	0	0	0	0	0	0
k__Fungi;p__Ascomycota;c__Saccharomycetes;o__Saccharomycetales;f__Pichiaceae;g__Brettanomyces;s__Brettanomyces_naardenensis	2.73e-06	0	0	0	0	0	0	0	0	0	0	0	0	0	0	0	0	0	0	0	0	0	0	0	0	0	0	8.38e-06	1.13e-06	1.46e-06	2.74e-06	0	0	0	0	0	0	0	0	0	0	0	0	0	0	0	0	0
k__Fungi;p__Ascomycota;c__Saccharomycetes;o__Saccharomycetales;f__Pichiaceae;g__Ogataea;s__[Candida]_boidinii	1.98e-06	0	0	4.95e-06	0	4.01e-06	0	9.05e-06	1.87e-06	4.09e-06	0	0	1.38e-06	0	2.32e-06	5.13e-06	0	8.34e-06	1.8e-06	0	1.84e-06	0	1.16e-05	0	0	0	0	5.2e-06	0	0	0	1.56e-06	0	0	0	0	0	0	0	2.82e-06	0	0	1.44e-06	0	0	0	5.1e-06	0
k__Fungi;p__Ascomycota;c__Saccharomycetes;o__Saccharomycetales;f__Pichiaceae;g__Pichia;s__[Candida]_inconspicua	2.51e-05	1.48e-05	2.76e-05	2.64e-05	1.15e-05	3.44e-05	2.54e-05	2.95e-05	4.69e-05	4.91e-05	2.05e-05	2.39e-05	2.87e-05	2.16e-05	3.72e-05	4.35e-05	3.82e-05	2.78e-05	1.05e-05	4.76e-05	3.4e-05	3.14e-05	2.89e-05	3.61e-05	2.51e-05	4.26e-05	1.04e-05	3.68e-05	3.53e-05	4.53e-05	2.65e-05	1.84e-05	3.63e-05	4.12e-05	1.79e-05	5.64e-05	1.72e-05	1.19e-05	1.51e-05	1.07e-05	2.05e-05	2.5e-05	2.32e-05	2.2e-05	1.91e-05	2.17e-05	3.46e-05	3.25e-05
k__Fungi;p__Ascomycota;c__Saccharomycetes;o__Saccharomycetales;f__Saccharomycetaceae;g__Kazachstania;s__Kazachstania_africana	0	0	3.91e-06	0	0	0	0	0	0	0	0	0	0	0	0	0	0	0	0	0	0	0	0	0	1.45e-06	0	4.07e-06	0	2.4e-06	1.66e-06	2.63e-06	0	0	0	0	0	0	0	0	0	0	0	0	0	0	0	0	0
k__Fungi;p__Ascomycota;c__Saccharomycetes;o__Saccharomycetales;f__Saccharomycetaceae;g__Kazachstania;s__Kazachstania_naganishii	0	0	1.14e-06	0	0	0	0	0	0	0	0	0	0	0	0	0	0	0	0	0	0	0	0	0	5.78e-06	0	7.24e-06	5.9e-06	5.46e-06	8.25e-06	6.3e-06	0	0	0	0	0	0	0	0	0	0	0	0	0	0	0	0	0
k__Fungi;p__Ascomycota;c__Saccharomycetes;o__Saccharomycetales;f__Saccharomycetaceae;g__Kluyveromyces;s__Kluyveromyces_dobzhanskii	0	0	0	0	0	4.53e-06	2.21e-06	0	4.23e-06	0	0	0	1.4e-05	0	0	0	0	0	0	0	0	1.9e-06	0	1.62e-06	0	2.27e-06	0	0	1.86e-06	0	0	1.76e-06	3.5e-06	2.34e-06	0	0	2.78e-06	0	0	0	0	0	0	4.37e-06	0	0	0	2.06e-06
k__Fungi;p__Ascomycota;c__Saccharomycetes;o__Saccharomycetales;f__Saccharomycetaceae;g__Lachancea;s__Lachancea_lanzarotensis	0	0	0	0	0	0	0	0	0	0	0	0	0	0	0	0	0	0	0	0	0	0	0	0	0	0	0	1.45e-06	0	1.34e-06	5e-06	0	0	0	0	0	0	0	0	0	0	0	0	0	0	0	0	0
k__Fungi;p__Ascomycota;c__Saccharomycetes;o__Saccharomycetales;f__Saccharomycetaceae;g__Lachancea;s__Lachancea_mirantina	2.14e-06	1.45e-06	0	0	0	0	0	0	0	0	0	1.72e-06	0	0	0	0	0	0	5.87e-06	0	0	0	0	0	0	0	0	0	0	3.46e-06	6.45e-06	0	0	0	0	2.68e-06	2.66e-06	0	0	0	0	0	0	0	0	0	0	0
k__Fungi;p__Ascomycota;c__Saccharomycetes;o__Saccharomycetales;f__Saccharomycetaceae;g__Lachancea;s__Lachancea_nothofagi	0	0	2.05e-06	3.48e-06	1.03e-05	0	6.19e-06	4.77e-06	0	0	0	0	4.36e-06	5.13e-06	4.89e-06	0	0	2.2e-06	0	1.65e-06	1.94e-06	1.77e-06	0	6.03e-06	1.43e-06	0	1.18e-06	1.83e-06	0	0	0	0	0	0	1.72e-06	0	0	0	0	0	0	0	3.04e-06	4.07e-06	0	4.72e-06	0	0
k__Fungi;p__Ascomycota;c__Saccharomycetes;o__Saccharomycetales;f__Saccharomycetaceae;g__Lachancea;s__Lachancea_sp._PJ-2012a	0	3.37e-06	0	2.77e-06	0	1.51e-05	0	9.49e-06	0	1.71e-06	3.4e-06	0	1.16e-06	0	0	1.43e-06	0	0	0	3.52e-06	1.54e-06	0	3.9e-06	0	0	0	0	2.91e-06	0	0	1.67e-06	1.31e-06	2.6e-06	0	0	2.07e-06	2.06e-06	0	0	2.37e-06	0	9.5e-06	2.42e-06	0	3.9e-06	5.63e-06	0	0
k__Fungi;p__Ascomycota;c__Saccharomycetes;o__Saccharomycetales;f__Saccharomycetaceae;g__Lachancea;s__Lachancea_thermotolerans	0	4.41e-06	0	1.81e-06	0	0	0	0	0	0	0	0	0	0	0	0	0	0	0	0	0	0	0	1.57e-06	0	0	1.23e-06	0	0	0	0	0	0	0	0	0	0	0	0	0	0	0	0	0	2.55e-06	4.92e-06	0	0
k__Fungi;p__Ascomycota;c__Saccharomycetes;o__Saccharomycetales;f__Saccharomycetaceae;g__Nakaseomyces;s__[Candida]_glabrata	0	0	0	0	6.73e-06	2.3e-06	4.49e-06	0	0	0	0	1.09e-05	0	0	0	1.96e-06	8.37e-06	2.39e-06	2.07e-06	0	4.22e-06	7.7e-06	0	0	0	0	0	1.99e-06	0	0	0	3.58e-06	3.55e-06	7.11e-06	0	2.83e-06	0	0	4.92e-06	0	2.54e-06	0	0	4.43e-06	0	0	0	0
k__Fungi;p__Ascomycota;c__Saccharomycetes;o__Saccharomycetales;f__Saccharomycetaceae;g__Naumovozyma;s__Naumovozyma_dairenensis	5.32e-06	1.63e-06	1.3e-06	0	3.91e-06	4.01e-06	0	0	0	2.28e-06	4.05e-06	0	2.75e-06	2.1e-06	6.19e-06	0	1.9e-06	6.95e-06	1.2e-06	9.38e-06	0	1.31e-05	3.1e-06	6.64e-06	9.02e-07	0	2.71e-06	2.31e-06	0	5.33e-06	1.28e-05	6.24e-06	3.79e-06	1.38e-06	5.83e-06	1.65e-06	6.01e-06	0	5.72e-06	0	5.91e-06	3.77e-06	6.42e-06	1.07e-05	1.55e-06	1.49e-06	2.27e-06	4.87e-06
k__Fungi;p__Ascomycota;c__Saccharomycetes;o__Saccharomycetales;f__Saccharomycetaceae;g__Pachysolen;s__Pachysolen_tannophilus	7.24e-06	0	7.05e-06	0	5.87e-06	2e-06	0	0	0	0	2.03e-06	0	1.38e-06	0	0	0	0	8.34e-06	0	0	5.52e-06	1.68e-06	0	1.43e-06	1.5e-05	0	8.98e-06	6.22e-06	2.22e-06	7.1e-06	1.81e-05	0	0	0	0	0	0	0	0	0	6.65e-06	2.83e-06	8.67e-06	0	0	0	0	3.65e-06
k__Fungi;p__Ascomycota;c__Saccharomycetes;o__Saccharomycetales;f__Saccharomycetaceae;g__Saccharomyces;s__Saccharomyces_cerevisiae	8.07e-06	4.45e-06	1.33e-05	1.86e-05	6.61e-06	4.11e-06	2.18e-06	1.48e-05	0	1.99e-06	4.39e-06	1e-05	1.53e-06	6.76e-06	0	1.73e-06	2.83e-06	1.54e-05	9.55e-06	0	5.5e-06	6.8e-06	1.2e-05	1.88e-05	1.14e-05	2.85e-05	1.21e-05	1.07e-05	1.23e-05	3.14e-05	1.31e-05	6.73e-06	1.16e-05	4.19e-06	0	5.24e-06	2.86e-06	0	3.01e-06	9.19e-06	2.51e-06	3.2e-06	1.61e-06	5.95e-06	1.42e-05	7.15e-06	8.53e-06	0
k__Fungi;p__Ascomycota;c__Saccharomycetes;o__Saccharomycetales;f__Saccharomycetaceae;g__Tetrapisispora;s__Tetrapisispora_phaffii	1.57e-06	0	0	0	0	0	0	0	0	0	0	0	0	0	0	0	0	0	0	0	0	0	0	0	2.37e-06	0	0	0	2.62e-06	3.82e-06	2.44e-06	0	0	0	0	0	0	0	0	0	0	0	0	0	0	0	0	0
k__Fungi;p__Ascomycota;c__Saccharomycetes;o__Saccharomycetales;f__Saccharomycetaceae;g__Torulaspora;s__Torulaspora_globosa	2.49e-06	0	1.95e-06	0	1.96e-06	0	1.96e-06	2.26e-06	0	0	6.08e-06	0	0	6.49e-06	0	0	0	0	1.8e-06	0	0	3.35e-06	0	1.43e-06	1.7e-06	0	4.24e-06	1.73e-06	0	1.01e-06	3.97e-06	0	0	4.13e-06	1.64e-06	0	0	0	0	0	0	0	0	0	0	0	0	0
k__Fungi;p__Ascomycota;c__Saccharomycetes;o__Saccharomycetales;f__Saccharomycetaceae;g__Vanderwaltozyma;s__Vanderwaltozyma_polyspora	0	0	0	0	1.96e-06	8.02e-06	1.96e-06	0	1.87e-06	0	0	0	1.38e-06	0	0	6.83e-06	0	0	0	0	0	0	0	0	0	0	2.25e-06	3.47e-06	0	6.39e-06	0	0	3.1e-06	0	0	0	0	0	0	0	0	0	0	0	0	0	1.7e-06	0
k__Fungi;p__Ascomycota;c__Saccharomycetes;o__Saccharomycetales;f__Saccharomycodaceae;g__Hanseniaspora;s__Hanseniaspora_guilliermondii	1.46e-06	0	4.3e-06	0	0	0	0	0	0	0	0	0	0	0	0	0	0	0	0	0	0	0	0	0	6.97e-06	0	8.26e-07	0	1.21e-06	2.23e-06	3.28e-06	0	0	0	0	0	0	0	0	0	0	0	0	0	0	0	0	0
k__Fungi;p__Ascomycota;c__Saccharomycetes;o__Saccharomycetales;f__Saccharomycodaceae;g__Hanseniaspora;s__Hanseniaspora_osmophila	0	0	0	0	0	0	0	0	0	0	4.58e-06	0	0	1.83e-06	0	0	0	2.36e-06	4.08e-06	1.77e-06	4.16e-06	5.69e-06	0	0	3.06e-06	4.54e-06	1.27e-06	0	1.86e-06	0	4.49e-06	1.76e-06	0	2.34e-06	1.85e-06	0	2.78e-06	1.75e-06	3.23e-06	0	0	3.2e-06	3.47e-06	0	2.63e-06	5.06e-06	0	0
k__Fungi;p__Ascomycota;c__Saccharomycetes;o__Saccharomycetales;f__Saccharomycodaceae;g__Hanseniaspora;s__Hanseniaspora_uvarum	0.000963273	0.000519787	0.000965698	0.000952928	0.000949963	0.00114745	0.000956763	0.00111978	0.000802805	0.000921174	0.000846274	0.000888159	0.000714578	0.00095617	0.000960195	0.000914415	0.000940394	0.000981713	0.000801172	0.000899691	0.000918573	0.00102818	0.00083937	0.000767505	0.000697884	0.0010021	0.000584109	0.000923508	0.000663563	0.00092518	0.000811467	0.000846365	0.00101183	0.000854535	0.000702812	0.000847062	0.000830666	0.000502272	0.000778504	0.000896394	0.000851997	0.000969102	0.000780483	0.00106628	0.000959716	0.000864056	0.000758578	0.000821301
k__Fungi;p__Ascomycota;c__Saccharomycetes;o__Saccharomycetales;f__Saccharomycodaceae;g__Hanseniaspora;s__Hanseniaspora_valbyensis	5.73e-06	0	1.35e-05	3.63e-06	0	6.7e-06	4.3e-06	2.45e-06	0	0	0	1.72e-06	1.53e-06	1.81e-06	0	0	0	4.58e-06	1.19e-05	0	3.99e-06	5.45e-06	7.56e-06	0	0	0	4.02e-06	8.54e-06	3.14e-06	1.19e-05	2.89e-06	0	0	4.61e-06	7.09e-06	5.35e-06	1.33e-05	1.72e-06	0	3.15e-06	0	3.15e-06	1.56e-06	2.09e-06	0	0	0	1.98e-06
k__Fungi;p__Ascomycota;c__Saccharomycetes;o__Saccharomycetales;f__Trichomonascaceae;g__Sugiyamaella;s__Sugiyamaella_lignohabitans	0	0	0	1.09e-05	2.28e-06	2.33e-06	0	0	2.03e-06	2.38e-06	2.19e-06	1.72e-06	0	0	0	0	0	0	8.41e-06	1.82e-06	0	1.82e-06	2.52e-06	3.1e-06	1.57e-06	0	0	0	0	5.32e-06	0	0	1.68e-06	0	0	0	2.86e-06	1.8e-06	0	0	4.8e-06	0	3.13e-06	2.25e-06	0	0	0	2.13e-06
k__Fungi;p__Ascomycota;c__Saccharomycetes;o__Saccharomycetales;f__Trichomonascaceae;g__Trichomonascus;s__Trichomonascus_ciferrii	0	0	0	0	0	0	0	0	0	0	0	0	0	0	0	0	0	0	0	0	0	0	0	0	5.74e-06	0	1.61e-06	0	2.31e-06	3.49e-06	4.19e-06	0	0	0	0	0	0	0	0	0	0	0	0	0	0	0	0	0
k__Fungi;p__Ascomycota;c__Saccharomycetes;o__Saccharomycetales;f__Trichomonascaceae;g__Wickerhamiella;s__Wickerhamiella_sorbophila	0	0	0	0	0	0	0	0	0	0	0	0	0	1.83e-06	0	0	0	0	0	0	0	0	0	0	1.53e-06	0	2.56e-06	0	0	0	0	3.53e-06	3.5e-06	2.34e-06	0	0	5.56e-06	1.75e-06	0	6.38e-06	0	0	0	0	2.63e-06	2.53e-06	1.92e-06	2.06e-06
k__Fungi;p__Ascomycota;c__Saccharomycetes;o__Saccharomycetales;f__Trigonopsidaceae;g__Tortispora;s__Tortispora_caseinolytica	3.31e-06	0	0	0	0	0	0	0	0	0	0	0	0	0	0	0	0	0	0	0	0	0	0	0	0	2.27e-06	7.14e-06	2.71e-06	2.1e-06	8.31e-07	3.76e-06	0	0	0	1.85e-06	0	5.57e-06	0	0	6.38e-06	0	0	0	0	0	0	0	0
k__Fungi;p__Ascomycota;c__Saccharomycetes;o__Saccharomycetales;f__unclassified;g__Diutina;s__Diutina_rugosa	0	0	0	0	0	0	0	0	0	0	0	0	0	0	0	0	0	0	0	0	0	0	0	0	8.37e-07	0	0	3.22e-06	1.02e-06	9.89e-07	0	0	0	0	0	0	0	0	0	0	0	0	0	0	0	0	0	0
k__Fungi;p__Ascomycota;c__Saccharomycetes;o__Saccharomycetales;f__unclassified;g__Kuraishia;s__Kuraishia_capsulata	5.55e-06	0	4.3e-06	0	0	0	0	0	0	0	0	0	0	0	0	0	0	0	0	0	0	0	0	0	1.38e-05	0	8.9e-06	5.05e-06	9.62e-06	1.43e-05	1.77e-05	0	0	0	0	0	0	0	0	0	0	0	0	0	0	0	0	0
k__Fungi;p__Ascomycota;c__Saccharomycetes;o__Saccharomycetales;f__unclassified;g__Nadsonia;s__Nadsonia_fulvescens	0	0	0	0	0	0	0	0	0	0	0	0	0	0	0	0	0	0	0	0	0	0	0	0	8.97e-06	0	7.01e-07	5.63e-06	4.18e-06	6.82e-06	7.53e-06	0	0	0	1.23e-06	5.56e-06	1.84e-06	0	0	0	0	0	0	0	0	0	0	0
k__Fungi;p__Ascomycota;c__Schizosaccharomycetes;o__Schizosaccharomycetales;f__Schizosaccharomycetaceae;g__Schizosaccharomyces;s__Schizosaccharomyces_japonicus	4.29e-06	0	1.06e-06	0	0	0	0	0	0	0	0	0	0	0	0	0	0	0	0	0	0	0	0	0	3.66e-06	0	4.26e-06	1.83e-06	0	1.01e-06	4.27e-06	0	0	0	0	0	0	0	0	0	0	0	0	0	0	0	0	0
k__Fungi;p__Ascomycota;c__Schizosaccharomycetes;o__Schizosaccharomycetales;f__Schizosaccharomycetaceae;g__Schizosaccharomyces;s__Schizosaccharomyces_octosporus	6.17e-06	5.57e-06	0	0	1.63e-05	0	0	4.77e-06	1.95e-06	4.37e-06	6.32e-06	4.95e-06	4.34e-06	8.44e-06	1.96e-05	7.11e-06	5.13e-06	2.17e-06	7.51e-06	1.63e-06	9.62e-06	1.74e-06	0	0	1.45e-06	2.09e-06	3.57e-06	1.45e-05	8.54e-06	5.08e-06	1.24e-05	1.67e-06	9.76e-06	0	1.75e-06	0	7.67e-06	8.09e-06	1.53e-06	0	6.98e-06	1.47e-05	1.5e-06	4.02e-06	2.42e-06	1.64e-05	5.36e-06	3.9e-06
k__Fungi;p__Ascomycota;c__Schizosaccharomycetes;o__Schizosaccharomycetales;f__Schizosaccharomycetaceae;g__Schizosaccharomyces;s__Schizosaccharomyces_pombe	0	0	1.62e-06	0	0	0	0	0	0	0	0	0	0	0	0	0	0	0	0	0	0	0	0	0	0	0	9.32e-07	0	4.09e-06	3.98e-06	0	0	0	0	0	0	0	0	0	0	0	0	0	0	0	0	0	0
k__Fungi;p__Ascomycota;c__Sordariomycetes;o__Coniochaetales;f__Coniochaetaceae;g__Coniochaeta;s__Coniochaeta_pulveracea	2.14e-06	0	0	0	0	0	0	0	2.03e-06	0	1.1e-05	0	1.49e-06	0	5.03e-06	0	0	0	0	3.39e-06	0	3.63e-06	0	0	0	2.17e-06	1.22e-06	3.76e-06	1.78e-06	0	0	0	0	4.48e-06	0	0	0	0	0	0	0	0	1.56e-06	2.09e-06	0	2.42e-06	0	0
k__Fungi;p__Ascomycota;c__Sordariomycetes;o__Coniochaetales;f__Coniochaetaceae;g__Coniochaeta;s__Coniochaeta_sp._2T2.1	0	0	2.11e-06	0	0	6.51e-06	0	0	1.01e-05	2.21e-06	0	0	0	0	0	0	0	0	0	0	1.99e-06	0	0	0	0	0	0	0	0	0	0	3.38e-06	1.68e-06	2.24e-06	0	0	5.32e-06	0	0	6.12e-06	0	0	1.56e-06	0	0	0	0	0
k__Fungi;p__Ascomycota;c__Sordariomycetes;o__Diaporthales;f__Cryphonectriaceae;g__Cryphonectria;s__Cryphonectria_parasitica	0	0	0	0	0	0	2.28e-06	2.63e-06	0	0	0	0	0	0	0	0	0	0	0	0	0	0	0	1.67e-06	0	2.34e-06	0	0	1.91e-06	0	0	0	0	0	0	0	2.86e-06	7.2e-06	0	0	0	0	0	0	0	0	0	0
k__Fungi;p__Ascomycota;c__Sordariomycetes;o__Diaporthales;f__Diaporthaceae;g__Diaporthe;s__Diaporthe_ampelina	5.62e-06	0	3.25e-06	0	0	0	0	0	0	0	0	0	0	0	1.09e-06	0	0	0	0	0	0	0	0	0	8.01e-06	0	7.51e-06	1.31e-06	6.6e-06	6.75e-06	3.74e-06	0	0	0	0	0	0	0	0	0	0	0	0	0	0	0	0	0
k__Fungi;p__Ascomycota;c__Sordariomycetes;o__Diaporthales;f__Schizoparmaceae;g__Coniella;s__Coniella_lustricola	9.96e-06	0	9.46e-06	0	0	0	0	0	0	0	0	0	0	0	0	0	0	0	0	1.67e-07	0	0	0	0	1.54e-05	0	1.46e-05	1.15e-05	1.05e-05	1.63e-05	1.7e-05	0	0	0	0	0	0	0	0	0	0	0	0	0	0	0	0	0
k__Fungi;p__Ascomycota;c__Sordariomycetes;o__Glomerellales;f__Glomerellaceae;g__Colletotrichum;s__Colletotrichum_asianum	0	0	2.25e-06	0	0	0	0	0	0	0	0	0	0	0	0	0	0	0	0	0	0	0	0	0	0	0	7.96e-07	4.92e-06	2.33e-06	2.27e-06	0	0	0	0	0	0	0	0	0	0	0	0	0	0	0	0	0	0
k__Fungi;p__Ascomycota;c__Sordariomycetes;o__Glomerellales;f__Glomerellaceae;g__Colletotrichum;s__Colletotrichum_graminicola	0	0	2.2e-06	0	4.42e-06	0	0	5.11e-06	0	0	0	0	0	0	0	7.73e-06	0	2.36e-06	2.04e-06	0	0	0	0	0	0	2.27e-06	0	0	0	7.23e-06	0	0	1.75e-06	0	0	0	0	0	0	0	0	6.4e-06	0	0	5.25e-06	0	0	2.06e-06
k__Fungi;p__Ascomycota;c__Sordariomycetes;o__Glomerellales;f__Glomerellaceae;g__Colletotrichum;s__Colletotrichum_incanum	0	0	0	0	0	0	0	0	0	0	0	0	0	0	0	0	0	0	0	0	0	0	0	0	0	0	3.65e-06	0	3.56e-06	1.73e-06	2.15e-06	0	0	0	0	0	0	0	0	0	0	0	0	0	0	0	0	0
k__Fungi;p__Ascomycota;c__Sordariomycetes;o__Glomerellales;f__Glomerellaceae;g__Colletotrichum;s__Colletotrichum_siamense	0	0	0	0	0	0	0	0	0	0	0	0	0	0	0	0	0	0	0	0	0	0	0	0	1.48e-06	0	1.22e-06	2.84e-06	0	8.72e-07	4.33e-06	0	0	0	0	0	0	0	0	0	0	0	0	0	0	0	0	0
k__Fungi;p__Ascomycota;c__Sordariomycetes;o__Glomerellales;f__Glomerellaceae;g__Colletotrichum;s__Colletotrichum_viniferum	1.85e-06	0	7.12e-06	0	0	0	0	0	0	0	0	0	0	0	0	0	0	0	0	0	0	0	0	0	4.96e-06	0	4.99e-06	2.86e-06	3.44e-06	5.05e-06	8.07e-06	0	0	0	0	0	0	0	0	0	0	0	0	0	0	0	0	0
k__Fungi;p__Ascomycota;c__Sordariomycetes;o__Glomerellales;f__Plectosphaerellaceae;g__Verticillium;s__Verticillium_longisporum	0	1.43e-06	0	1.76e-06	0	4.28e-06	2.09e-06	0	0	0	4.33e-06	3.39e-06	0	0	2.48e-06	1.83e-06	0	0	3.86e-06	0	0	0	0	0	0	4.29e-06	2.4e-06	0	1.76e-06	0	6.36e-06	5e-06	1.66e-06	0	0	5.28e-06	1.05e-05	0	1.53e-06	0	2.37e-06	9.07e-06	6.17e-06	0	2.48e-06	2.39e-06	1.82e-06	9.75e-06
k__Fungi;p__Ascomycota;c__Sordariomycetes;o__Hypocreales;f__Bionectriaceae;g__Geosmithia;s__Geosmithia_morbida	0	0	3.8e-06	0	0	0	0	0	0	0	0	0	0	0	0	0	0	0	0	0	0	0	0	0	3.96e-06	0	3.28e-06	0	1.6e-06	0	0	0	0	0	0	0	0	0	0	0	0	0	0	0	0	0	0	0
k__Fungi;p__Ascomycota;c__Sordariomycetes;o__Hypocreales;f__Clavicipitaceae;g__Claviceps;s__Claviceps_purpurea	0	0	0	0	0	0	0	0	0	0	0	0	0	0	0	0	0	0	0	0	0	0	0	0	0	0	0	0	0	0	0	1.2e-06	1.2e-06	6.61e-06	1.26e-06	7.63e-06	1.9e-06	0	0	0	0	0	0	0	0	0	0	0
k__Fungi;p__Ascomycota;c__Sordariomycetes;o__Hypocreales;f__Hypocreaceae;g__Trichoderma;s__Trichoderma_asperellum	2.97e-06	0	2.92e-06	0	0	0	0	0	0	0	0	0	0	0	0	0	0	0	0	0	0	0	0	0	0	0	2.53e-06	3.9e-06	1.23e-06	2.4e-06	2.98e-06	0	0	0	0	0	0	0	0	0	0	0	0	0	0	0	0	0
k__Fungi;p__Ascomycota;c__Sordariomycetes;o__Hypocreales;f__Hypocreaceae;g__Trichoderma;s__Trichoderma_atroviride	0	0	0	0	0	0	0	0	0	0	0	0	0	0	0	0	0	0	0	0	0	0	0	0	0	0	0	8.25e-07	7.82e-07	3.8e-06	0	0	0	0	0	0	0	0	0	0	0	0	0	0	0	0	0	0
k__Fungi;p__Ascomycota;c__Sordariomycetes;o__Hypocreales;f__Hypocreaceae;g__Trichoderma;s__Trichoderma_citrinoviride	6.28e-06	0	2.58e-06	0	0	0	0	0	0	0	0	0	0	0	0	0	0	0	0	0	0	0	0	0	4.17e-06	0	5.84e-06	4.89e-06	4.42e-06	4.93e-06	8.31e-06	0	0	0	0	0	0	0	0	0	0	0	0	0	0	0	0	0
k__Fungi;p__Ascomycota;c__Sordariomycetes;o__Hypocreales;f__Hypocreaceae;g__Trichoderma;s__Trichoderma_gamsii	0	0	0	1.74e-06	0	0	0	0	0	0	0	0	0	3.42e-06	0	0	1.03e-05	0	0	0	1.94e-06	0	0	0	0	0	0	0	0	1.68e-06	0	0	0	0	0	7.81e-06	0	0	0	0	0	0	0	0	0	0	5.38e-06	1.92e-06
k__Fungi;p__Ascomycota;c__Sordariomycetes;o__Hypocreales;f__Hypocreaceae;g__Trichoderma;s__Trichoderma_longibrachiatum	1.93e-06	0	0	0	0	3.91e-06	0	0	0	0	3.95e-06	0	0	0	0	0	0	2.03e-06	7.04e-06	0	0	1.64e-06	2.27e-06	0	0	0	0	0	0	0	0	0	1.51e-06	0	0	0	0	0	0	0	0	0	0	3.77e-06	0	4.36e-06	0	0
k__Fungi;p__Ascomycota;c__Sordariomycetes;o__Hypocreales;f__Hypocreaceae;g__Trichoderma;s__Trichoderma_reesei	0	0	0	0	0	0	0	0	0	4.43e-06	0	0	0	0	0	0	0	6.78e-06	0	3.39e-06	0	0	2.52e-06	0	0	2.17e-06	0	0	7.12e-06	0	0	0	0	0	0	0	2.66e-06	0	0	0	0	0	1.56e-06	0	0	0	0	0
k__Fungi;p__Ascomycota;c__Sordariomycetes;o__Hypocreales;f__Hypocreaceae;g__unclassified;s__uncultured_Trichoderma	0	0	0	0	0	0	0	0	0	0	0	0	0	0	0	0	0	0	0	0	0	0	0	0	0	0	2.74e-06	2.82e-06	0	1.3e-06	0	0	0	0	0	0	0	0	0	0	0	0	0	0	0	0	0	0
k__Fungi;p__Ascomycota;c__Sordariomycetes;o__Hypocreales;f__Nectriaceae;g__Fusarium;s__Fusarium_acuminatum	2e-06	0	0	0	0	0	0	0	0	0	0	0	0	0	0	0	0	0	0	0	0	0	0	0	1.37e-06	0	1.14e-06	0	0	4.86e-06	2.01e-06	0	0	0	0	0	0	0	0	0	0	0	0	0	0	0	0	0
k__Fungi;p__Ascomycota;c__Sordariomycetes;o__Hypocreales;f__Nectriaceae;g__Fusarium;s__Fusarium_albosuccineum	2.41e-06	0	1.2e-06	0	0	0	0	0	0	0	0	0	0	0	0	0	0	0	0	0	0	0	0	0	7.41e-07	0	2.12e-06	5.85e-06	5.75e-06	1.61e-06	3.41e-06	0	0	0	0	0	0	0	0	0	0	0	0	0	0	0	0	0
k__Fungi;p__Ascomycota;c__Sordariomycetes;o__Hypocreales;f__Nectriaceae;g__Fusarium;s__Fusarium_gaditjirri	4.04e-06	0	4.97e-06	0	0	0	0	0	0	0	0	0	0	0	0	0	0	0	0	0	0	0	0	0	7.59e-06	0	6.3e-06	5.3e-06	5.86e-06	5.7e-06	9.11e-06	0	0	0	0	0	0	0	0	0	0	0	0	0	0	0	0	0
k__Fungi;p__Ascomycota;c__Sordariomycetes;o__Hypocreales;f__Nectriaceae;g__Fusarium;s__Fusarium_graminearum	1.71e-06	0	0	0	0	0	0	0	0	0	0	0	0	0	0	0	0	0	0	0	0	0	0	0	2.34e-06	0	2.92e-06	0	0	0	0	0	0	0	0	0	0	0	0	0	0	0	0	0	0	0	0	0
k__Fungi;p__Ascomycota;c__Sordariomycetes;o__Hypocreales;f__Nectriaceae;g__Fusarium;s__Fusarium_heterosporum	2.73e-06	0	0	1.76e-06	5.7e-06	2.92e-06	0	1.65e-06	0	0	0	0	7.36e-06	0	1.69e-06	3.74e-06	0	7.62e-06	0	1.67e-06	0	0	0	1.53e-06	2.42e-06	4.39e-06	6.34e-06	1.96e-06	1.2e-06	1.19e-05	9.11e-06	1.67e-06	0	0	3.6e-06	1.8e-06	0	4.74e-06	1.04e-06	8.44e-06	0	0	3.09e-06	0	2.63e-06	1.63e-06	1.24e-06	2.66e-06
k__Fungi;p__Ascomycota;c__Sordariomycetes;o__Hypocreales;f__Nectriaceae;g__Fusarium;s__Fusarium_solani	0	0	1.24e-06	0	0	0	0	0	0	0	0	0	0	0	0	0	0	0	0	0	0	0	0	0	2.57e-06	0	5.47e-06	1.26e-06	4.39e-06	2.33e-06	5.3e-06	0	0	0	0	0	0	0	0	0	0	0	0	0	0	0	0	0
k__Fungi;p__Ascomycota;c__Sordariomycetes;o__Hypocreales;f__Nectriaceae;g__Fusarium;s__Fusarium_zealandicum	0	0	3.53e-06	0	0	0	0	0	0	0	0	0	0	0	0	0	0	0	0	0	0	0	0	0	0	0	5.94e-06	3.15e-06	0	7.64e-06	0	0	0	0	0	0	0	0	0	0	0	0	0	0	0	0	0	0
k__Fungi;p__Ascomycota;c__Sordariomycetes;o__Hypocreales;f__Ophiocordycipitaceae;g__Ophiocordyceps;s__Ophiocordyceps_australis	2.4e-06	8.22e-06	0	1.72e-06	3.22e-06	3.63e-06	4.4e-06	1.37e-06	0	0	8.77e-06	3.84e-06	1.67e-06	6.61e-06	1.04e-05	3.1e-06	0	5.04e-06	5e-06	9.45e-07	2.61e-06	6.59e-06	2.81e-06	0	2.22e-06	1.21e-06	2.04e-06	4.66e-06	1.38e-06	2.9e-06	0	1.89e-06	0	0	4.94e-06	1.93e-06	5.94e-06	9.36e-07	8.65e-07	0	0	0	1.75e-06	0	4.22e-06	0	1.03e-06	1.1e-06
k__Fungi;p__Ascomycota;c__Sordariomycetes;o__Hypocreales;f__Ophiocordycipitaceae;g__Ophiocordyceps;s__Ophiocordyceps_camponoti-leonardi_(nom._inval.)	0	0	0	0	0	1.07e-05	0	2.42e-06	0	0	2.16e-06	0	0	0	0	0	2.6e-06	0	0	0	0	0	0	0	0	0	0	0	0	0	0	1.67e-06	0	0	0	0	0	0	0	0	0	0	0	0	0	0	1.82e-06	0
k__Fungi;p__Ascomycota;c__Sordariomycetes;o__Hypocreales;f__Ophiocordycipitaceae;g__Ophiocordyceps;s__Ophiocordyceps_camponoti-saundersi_(nom._inval.)	0	0	0	0	0	0	0	0	0	0	0	0	0	0	0	0	0	0	0	0	0	0	0	0	0	0	5.84e-06	0	1.71e-06	0	2.94e-06	0	0	0	0	0	0	0	0	0	0	0	0	0	0	0	0	0
k__Fungi;p__Ascomycota;c__Sordariomycetes;o__Hypocreales;f__Ophiocordycipitaceae;g__Ophiocordyceps;s__Ophiocordyceps_sinensis	0	0	0	0	0	0	0	0	0	0	0	0	0	0	0	0	0	0	0	0	0	0	0	0	0	0	0	0	5.13e-06	0	4.12e-06	0	0	0	0	0	0	0	0	0	0	0	0	0	0	0	0	0
k__Fungi;p__Ascomycota;c__Sordariomycetes;o__Hypocreales;f__unclassified;g__Acremonium;s__Acremonium_chrysogenum	1.5e-06	0	1.71e-06	0	0	0	0	0	0	0	0	0	0	0	0	0	0	0	0	0	0	0	0	0	3.07e-06	0	8.5e-07	0	0	7.83e-06	0	0	0	0	0	0	0	0	0	0	0	0	0	0	0	0	0	0
k__Fungi;p__Ascomycota;c__Sordariomycetes;o__Magnaporthales;f__Magnaporthaceae;g__Gaeumannomyces;s__Gaeumannomyces_tritici	5.47e-06	0	4.19e-06	0	0	0	0	0	0	0	0	0	0	0	0	0	0	0	0	0	0	0	0	0	1.25e-05	0	7.24e-06	7.99e-06	9.59e-06	1.47e-05	1.22e-05	0	0	0	0	0	0	0	0	0	0	0	0	0	0	0	0	0
k__Fungi;p__Ascomycota;c__Sordariomycetes;o__Microascales;f__Ceratocystidaceae;g__Ceratocystis;s__Ceratocystis_fimbriata	0	0	0	1.74e-06	0	0	2.06e-06	0	3.95e-06	0	0	1.67e-06	1.45e-06	5.13e-06	0	1.8e-06	2.56e-06	0	1.9e-06	0	0	0	0	0	0	0	0	0	0	1.68e-06	0	3.29e-06	0	0	1.72e-06	0	0	0	0	0	0	0	0	8.15e-06	0	0	0	0
k__Fungi;p__Ascomycota;c__Sordariomycetes;o__Microascales;f__Ceratocystidaceae;g__Thielaviopsis;s__Thielaviopsis_punctulata	1.24e-06	0	0	0	0	0	0	0	0	0	0	0	0	0	0	0	0	0	0	0	0	0	0	0	0	0	4.24e-06	2.25e-06	2.54e-06	3.49e-06	4.36e-06	0	0	0	0	0	0	0	0	0	0	0	0	0	0	0	0	0
k__Fungi;p__Ascomycota;c__Sordariomycetes;o__Ophiostomatales;f__Ophiostomataceae;g__Grosmannia;s__Grosmannia_clavigera	0	0	0	3.54e-06	1.4e-06	0	0	0	5.36e-06	0	5.8e-06	0	0	1.16e-06	0	0	0	2.98e-06	1.29e-06	0	1.32e-06	0	1.67e-06	0	1.59e-06	2.87e-06	6.58e-07	2.48e-06	9.64e-07	3.22e-06	4.66e-06	2.23e-06	4.43e-06	1.48e-06	0	0	0	0	0	0	0	2.03e-06	0	2.77e-06	1.66e-06	8.01e-06	1.22e-06	0
k__Fungi;p__Ascomycota;c__Sordariomycetes;o__Ophiostomatales;f__Ophiostomataceae;g__Leptographium;s__Leptographium_qinlingense_(nom._inval.)	3.63e-06	0	8.94e-07	0	0	0	0	0	0	0	0	0	0	0	0	0	0	0	0	0	0	0	0	0	5.82e-06	0	2.54e-06	6.21e-06	6.79e-06	4.4e-06	9.86e-06	0	0	0	0	0	0	0	0	0	0	0	0	0	0	0	0	0
k__Fungi;p__Ascomycota;c__Sordariomycetes;o__Ophiostomatales;f__Ophiostomataceae;g__Sporothrix;s__Sporothrix_insectorum	4.85e-06	0	0	1.63e-06	0	0	1.68e-06	0	0	1.75e-06	0	6.33e-06	0	3.78e-06	0	2.16e-06	0	0	0	0	0	0	0	1.69e-06	8.62e-07	0	2.14e-06	0	4.36e-06	5.09e-06	2.18e-06	0	0	0	0	0	0	1.33e-06	0	0	0	0	0	0	0	0	0	0
k__Fungi;p__Ascomycota;c__Sordariomycetes;o__Sordariales;f__Chaetomiaceae;g__Chaetomium;s__Chaetomium_thermophilum	1.57e-06	0	0	0	0	0	0	0	0	0	0	0	0	0	0	0	0	0	0	0	0	0	0	0	4.31e-06	0	6.26e-06	4.14e-06	3.92e-06	8.9e-06	9.48e-06	0	0	0	0	0	0	0	0	0	0	0	0	0	0	0	0	0
k__Fungi;p__Ascomycota;c__Sordariomycetes;o__Sordariales;f__Chaetomiaceae;g__Podospora;s__Podospora_comata	5.42e-06	5.14e-06	3.71e-06	3.15e-06	1.56e-06	1.19e-05	4.56e-08	8.73e-06	2.26e-06	2.13e-06	1.17e-05	5.43e-06	6.79e-06	2.22e-06	4.76e-06	0	4.16e-06	5.18e-06	2.98e-06	2.14e-06	0	3.73e-06	6.37e-06	1.68e-06	8e-06	2.75e-06	6.91e-06	4.75e-06	1.81e-06	2.99e-06	6.79e-06	3.2e-06	1.06e-06	1.41e-06	1.6e-06	3.68e-06	1.68e-06	3.18e-06	1.96e-06	0	0	3.1e-06	0	5.87e-06	6.36e-06	3.06e-06	2.49e-06	1.25e-06
k__Fungi;p__Ascomycota;c__Sordariomycetes;o__Sordariales;f__Sordariaceae;g__Neurospora;s__Neurospora_crassa	0	0	0	0	0	0	0	0	0	0	0	0	0	0	0	0	0	0	0	0	0	0	0	0	1.19e-06	0	3.94e-06	1.52e-06	1.44e-06	0	0	0	0	0	0	0	0	0	0	0	0	0	0	0	0	0	0	0
k__Fungi;p__Ascomycota;c__Sordariomycetes;o__Togniniales;f__Togniniaceae;g__Phaeoacremonium;s__Phaeoacremonium_minimum	0	0	1.49e-06	0	0	0	0	0	0	0	0	0	0	0	0	0	0	0	0	0	0	0	0	0	0	0	0	0	3.87e-06	0	0	0	0	0	0	0	0	0	0	0	0	0	0	0	0	0	0	0
k__Fungi;p__Ascomycota;c__Sordariomycetes;o__Xylariales;f__Hypoxylaceae;g__Hypoxylon;s__Hypoxylon_sp._CI-4A	0	0	1.38e-06	0	0	0	0	0	0	0	0	0	0	0	0	0	0	0	0	0	0	0	0	0	2.99e-06	0	3.62e-06	7.1e-06	2.33e-06	6.54e-06	2.82e-06	0	0	0	0	0	0	0	0	0	0	0	0	0	0	0	0	0
k__Fungi;p__Ascomycota;c__Sordariomycetes;o__Xylariales;f__Xylariaceae;g__Rosellinia;s__Rosellinia_necatrix	0	0	0	0	1.96e-06	1e-05	0	0	0	6.13e-06	0	0	0	0	0	1.71e-06	0	0	0	4.69e-06	0	1.68e-06	0	0	0	0	0	0	1.64e-06	0	0	0	3.1e-06	4.13e-06	0	4.94e-06	0	3.09e-06	0	0	0	2.83e-06	0	1.93e-06	0	0	5.1e-06	0
k__Fungi;p__Ascomycota;c__Sordariomycetes;o__Xylariales;f__Xylariaceae;g__Xylaria;s__Xylaria_flabelliformis	0	0	0	0	0	0	0	0	0	0	0	0	0	0	0	0	0	0	0	0	0	0	0	0	1.53e-06	0	3.81e-06	3.92e-06	0	1.81e-06	0	0	0	0	0	0	0	0	0	0	0	0	0	0	0	0	0	0
k__Fungi;p__Ascomycota;c__Sordariomycetes;o__Xylariales;f__Xylariaceae;g__Xylaria;s__Xylaria_hypoxylon	1.27e-05	0	7.61e-06	9.42e-06	0	0	0	0	2.15e-06	0	0	3.02e-06	0	0	2.21e-06	0	0	0	0	1.49e-06	1.75e-06	0	0	0	1.16e-05	1.91e-06	9.6e-06	7.48e-06	3.86e-06	1.28e-05	6.61e-06	0	0	1.97e-06	0	0	0	0	0	0	0	0	0	0	0	0	0	0
k__Fungi;p__Ascomycota;c__Sordariomycetes;o__Xylariales;f__Xylariaceae;g__Xylaria;s__Xylaria_sp.	1.16e-05	0	3.31e-06	0	0	0	0	2.23e-06	0	0	0	0	0	4.81e-06	0	0	0	8.23e-06	0	3.09e-06	0	0	4.6e-06	0	1.04e-05	0	9.62e-06	2.86e-06	5.58e-06	4.81e-06	1e-05	4.62e-06	0	0	0	0	0	0	0	0	0	0	0	0	0	0	1.68e-06	0
k__Fungi;p__Ascomycota;c__Sordariomycetes;o__Xylariales;f__unclassified;g__Monosporascus;s__Monosporascus_sp._CRB-9-2	0	0	0	1.76e-06	0	2.14e-06	2.09e-06	2.42e-06	0	0	0	0	1.47e-06	3.47e-06	7.44e-06	0	2.6e-06	0	1.93e-06	0	0	0	0	0	0	0	0	0	0	0	8.49e-06	0	1.66e-06	0	0	0	0	1.65e-06	0	0	0	0	0	6.19e-06	0	0	0	0
k__Fungi;p__Ascomycota;c__Taphrinomycetes;o__Taphrinales;f__Protomycetaceae;g__Protomyces;s__Protomyces_lactucaedebilis	0	0	6.37e-06	5.01e-06	0	0	2.01e-06	0	0	0	2.36e-06	0	1.6e-06	1.89e-06	0	5.24e-06	2.46e-06	8.53e-06	0	0	5.67e-06	0	0	1.47e-06	1.34e-06	1.05e-05	7.84e-06	4.34e-06	1.32e-06	6.53e-06	1.21e-05	0	1.59e-06	1.22e-05	1.59e-06	7.32e-06	0	0	0	2.79e-05	0	0	0	3.92e-06	0	2.61e-06	1.98e-06	7.4e-06
k__Fungi;p__Ascomycota;c__Taphrinomycetes;o__Taphrinales;f__Taphrinaceae;g__Taphrina;s__Taphrina_deformans	1.88e-06	0	8.02e-06	0	4.12e-06	0	0	0	9.87e-06	4.31e-06	0	0	1.45e-06	0	0	0	0	8.79e-06	0	1.15e-05	0	0	9.81e-06	1.51e-06	1.43e-06	0	0	0	7.82e-06	1.68e-06	2.09e-06	0	0	4.36e-06	0	0	0	4.89e-06	0	0	0	0	0	2.04e-06	2.45e-06	0	0	1.92e-06
k__Fungi;p__Ascomycota;c__unclassified;o__unclassified;f__unclassified;g__Saitoella;s__Saitoella_complicata	2.66e-05	2.21e-06	1.78e-05	6.3e-06	7.78e-06	1.08e-05	0	9.7e-06	1.03e-05	8.85e-06	1.1e-05	9.18e-06	8.28e-06	1.7e-05	1.44e-05	3.24e-06	7.16e-06	1.26e-05	1.96e-06	7.86e-06	5.04e-06	7.74e-06	0	6.78e-06	3.21e-05	0	2.03e-05	3.55e-05	4.07e-05	3.32e-05	3.26e-05	4.67e-06	4.39e-06	0	3.9e-06	1.48e-05	2.11e-06	6.35e-06	4.28e-06	1.83e-05	0	2.79e-06	8.5e-06	3.66e-06	1.99e-06	1.24e-05	6.28e-06	1.15e-05
k__Fungi;p__Basidiomycota;c__Agaricomycetes;o__Agaricales;f__Agaricaceae;g__Leucoagaricus;s__Leucoagaricus_leucothites	1.59e-06	0	1.57e-06	0	0	0	0	0	0	0	0	0	0	0	0	0	0	0	0	0	0	0	0	0	1.09e-06	0	1.34e-05	6.71e-06	2.64e-06	2.57e-06	3.19e-06	0	0	0	0	0	0	0	0	0	0	0	0	0	0	0	0	0
k__Fungi;p__Basidiomycota;c__Agaricomycetes;o__Agaricales;f__Agaricaceae;g__Leucoagaricus;s__Leucoagaricus_sp._SymC.cos	4.01e-06	1.36e-06	3.85e-06	0	0	0	0	0	0	0	0	1.61e-06	1.4e-06	0	0	0	0	2.11e-06	0	1.58e-06	0	1.7e-06	0	4.35e-06	2.74e-06	2.03e-06	6.82e-06	0	4.75e-06	1.54e-06	0	3.16e-06	9.42e-06	2.09e-06	0	0	0	1.57e-06	3.62e-06	2.86e-06	2.25e-06	0	1.46e-06	1.96e-06	0	0	0	0
k__Fungi;p__Basidiomycota;c__Agaricomycetes;o__Agaricales;f__Amanitaceae;g__Amanita;s__Amanita_muscaria	1.18e-06	7.97e-07	2.32e-06	4.91e-06	4.66e-06	3.58e-06	7e-06	2.69e-06	2.23e-06	1.22e-06	4.83e-06	0	1.64e-06	9.66e-06	6.91e-06	4.07e-06	4.34e-06	2.48e-06	2.15e-06	5.58e-06	3.29e-06	9.99e-07	5.54e-06	3.41e-06	1.61e-06	8.36e-06	2.67e-06	0	0	2.85e-06	2.36e-06	2.79e-06	5.54e-06	2.46e-06	3.89e-06	2.94e-06	4.39e-06	2.76e-06	1.7e-06	1.01e-05	0	0	5.16e-06	1.15e-06	5.54e-06	5.33e-06	2.03e-06	4.35e-06
k__Fungi;p__Basidiomycota;c__Agaricomycetes;o__Agaricales;f__Bolbitiaceae;g__Agrocybe;s__Agrocybe_aegerita	0	1.43e-06	0	5.29e-06	0	4.28e-06	0	2.42e-06	0	0	4.33e-06	0	0	3.47e-06	0	1.83e-06	0	0	1.93e-06	1e-05	1.97e-06	1.79e-06	0	0	2.14e-06	2.14e-06	3.85e-06	0	3.49e-06	3.39e-06	3.8e-06	3.33e-06	0	0	0	0	0	0	0	0	0	6.05e-06	0	0	4.97e-06	0	3.64e-06	1.95e-06
k__Fungi;p__Basidiomycota;c__Agaricomycetes;o__Agaricales;f__Bolbitiaceae;g__Agrocybe;s__Agrocybe_pediades	3.32e-06	0	4.47e-06	0	0	0	0	0	0	0	0	0	0	0	0	0	0	0	0	0	0	0	0	0	3.77e-06	0	1.5e-06	6.13e-06	1.69e-06	1.59e-06	3.26e-06	0	0	0	0	0	0	0	0	0	0	0	0	0	0	0	0	0
k__Fungi;p__Basidiomycota;c__Agaricomycetes;o__Agaricales;f__Bolbitiaceae;g__Panaeolus;s__Panaeolus_cyanescens	2.3e-05	0	2.45e-05	0	0	0	0	0	0	0	0	0	0	0	0	0	0	0	0	0	0	0	0	0	4.9e-05	0	4.28e-05	5e-05	3.13e-05	4.47e-05	4.84e-05	0	0	0	0	0	0	0	0	0	0	0	0	0	0	0	0	0
k__Fungi;p__Basidiomycota;c__Agaricomycetes;o__Agaricales;f__Cortinariaceae;g__Gymnopilus;s__Gymnopilus_dilepis	1.46e-06	0	8.6e-06	7.35e-06	8.63e-06	1.47e-06	8.65e-06	0	0	1.5e-06	1.49e-06	1.17e-06	2.37e-06	0	1.71e-06	6.29e-06	0	5.23e-06	0	5.75e-06	6.77e-06	2.47e-06	0	1.05e-06	0	0	8.26e-07	1.28e-06	1.21e-06	2.35e-06	1.46e-06	1.15e-06	0	3.04e-06	5.32e-06	0	0	3.42e-06	2.1e-06	4.15e-06	8.16e-06	4.17e-06	0	6.41e-06	0	0	8.76e-06	2.69e-06
k__Fungi;p__Basidiomycota;c__Agaricomycetes;o__Agaricales;f__Fistulinaceae;g__Fistulina;s__Fistulina_hepatica	3.77e-06	2.46e-06	1.92e-06	0	0	5.94e-06	5.53e-06	4.15e-06	1.72e-06	1.87e-06	3.86e-06	0	4.08e-06	3.09e-06	0	1.57e-06	0	1.91e-06	1.78e-06	1.54e-06	1.69e-06	4.85e-06	0	1.41e-06	0	1.98e-06	1.11e-06	0	0	4.4e-06	3.92e-06	1.43e-06	0	1.22e-05	3.23e-06	0	0	0	1.31e-06	0	0	0	1.43e-06	1.08e-05	6.4e-06	0	1.68e-06	0
k__Fungi;p__Basidiomycota;c__Agaricomycetes;o__Agaricales;f__Lyophyllaceae;g__Hypsizygus;s__Hypsizygus_marmoreus	1.13e-06	0	0	0	0	0	0	0	0	0	0	0	0	0	0	0	0	0	0	0	0	0	0	0	4.65e-06	0	0	4.65e-06	2.52e-06	0	0	0	0	0	0	0	0	0	0	0	0	0	0	0	0	0	0	0
k__Fungi;p__Basidiomycota;c__Agaricomycetes;o__Agaricales;f__Lyophyllaceae;g__Termitomyces;s__Termitomyces_sp._J132	0	0	0	0	2.12e-06	8.68e-06	0	4.9e-06	0	0	0	1.72e-06	0	3.4e-06	4.7e-06	0	0	4.52e-06	0	7.92e-06	1.99e-06	7.15e-06	0	3.1e-06	0	2.03e-06	0	1.88e-06	1.78e-06	0	4.3e-06	0	0	2.24e-06	0	1.05e-05	0	0	1.55e-06	0	2.4e-06	0	0	2.09e-06	5.04e-06	0	0	1.98e-06
k__Fungi;p__Basidiomycota;c__Agaricomycetes;o__Agaricales;f__Lyophyllaceae;g__Tricholomella;s__Tricholomella_constricta	2.09e-06	0	0	0	0	0	0	0	0	0	0	0	0	0	0	0	0	0	0	0	0	0	0	0	4.28e-06	0	3.55e-06	3.66e-06	0	0	0	0	0	0	0	0	0	0	0	0	0	0	0	0	0	0	0	0
k__Fungi;p__Basidiomycota;c__Agaricomycetes;o__Agaricales;f__Marasmiaceae;g__Moniliophthora;s__Moniliophthora_perniciosa	2.29e-05	0	1.49e-05	0	0	0	0	0	0	0	0	0	0	6.24e-07	0	0	0	0	0	0	0	0	0	0	2.96e-05	0	1.93e-05	2.43e-05	3.37e-05	1.88e-05	2.69e-05	0	0	0	0	0	0	0	0	0	0	0	0	0	0	0	0	0
k__Fungi;p__Basidiomycota;c__Agaricomycetes;o__Agaricales;f__Marasmiaceae;g__Moniliophthora;s__Moniliophthora_roreri	0	0	3.9e-06	3.57e-06	0	2e-06	1.11e-05	2.63e-06	3.75e-06	0	4.05e-06	0	0	1.62e-06	0	1.71e-06	0	2.08e-06	4.2e-06	1.82e-06	0	0	0	1.14e-05	1.57e-06	6.02e-06	0	3.47e-06	1.91e-06	1.17e-05	2.31e-06	0	3.35e-06	0	1.64e-06	0	2.46e-06	0	4.29e-06	0	4.43e-06	0	1.44e-06	0	0	0	1.7e-06	1.83e-06
k__Fungi;p__Basidiomycota;c__Agaricomycetes;o__Agaricales;f__Marasmiaceae;g__Tetrapyrgos;s__Tetrapyrgos_nigripes	0	0	1.69e-06	1.81e-06	0	2.2e-06	2.15e-06	2.49e-06	0	0	0	0	0	1.78e-06	2.55e-06	0	0	0	0	0	0	1.84e-06	2.56e-06	0	1.17e-06	0	3.89e-06	6.41e-06	0	5.91e-06	1.72e-06	3.43e-06	0	0	0	1.09e-05	0	0	0	0	2.44e-06	3.11e-06	0	0	0	0	0	0
k__Fungi;p__Basidiomycota;c__Agaricomycetes;o__Agaricales;f__Mycenaceae;g__Mycena;s__Mycena_chlorophos	1.36e-05	2.18e-06	1.04e-05	1.29e-06	0	1.56e-06	3.05e-06	1.24e-05	0	0	3.16e-06	2.48e-06	2.15e-06	1.27e-06	1.81e-06	3.27e-06	1.9e-06	4.88e-06	0	3.66e-06	0	1.31e-06	0	4.46e-06	1.47e-05	4.69e-06	1.09e-05	9e-06	1.29e-05	1.39e-05	1.2e-05	7.3e-06	1.21e-06	1.61e-06	1.28e-06	7.7e-06	0	2.96e-06	1.12e-06	0	1.73e-06	4.42e-06	1.24e-05	4.52e-06	0	0	0	1.42e-06
k__Fungi;p__Basidiomycota;c__Agaricomycetes;o__Agaricales;f__Omphalotaceae;g__Gymnopus;s__Gymnopus_androsaceus	9.71e-07	0	1.12e-06	0	0	0	0	0	0	0	0	0	0	0	0	0	0	0	0	0	0	0	0	0	0	0	2.45e-06	8.51e-07	8.06e-07	0	0	0	0	0	0	0	0	0	0	0	0	0	0	0	0	0	0	0
k__Fungi;p__Basidiomycota;c__Agaricomycetes;o__Agaricales;f__Omphalotaceae;g__Gymnopus;s__Gymnopus_confluens	0	0	0	0	0	0	0	0	0	0	0	0	0	0	0	0	0	0	0	0	0	0	0	0	1.46e-06	0	1.3e-06	0	2.39e-06	0	0	0	0	0	0	0	0	0	0	0	0	0	0	0	0	0	0	0
k__Fungi;p__Basidiomycota;c__Agaricomycetes;o__Agaricales;f__Omphalotaceae;g__Gymnopus;s__Gymnopus_luxurians	5.94e-06	0	1.95e-06	0	0	0	7.83e-06	0	0	2.04e-06	0	4.76e-06	0	1.62e-06	0	0	4.86e-06	0	1.8e-06	0	0	0	0	1.43e-06	0	0	1.12e-06	0	0	0	0	0	0	0	0	0	4.91e-06	0	0	0	2.22e-06	0	0	0	0	0	0	0
k__Fungi;p__Basidiomycota;c__Agaricomycetes;o__Agaricales;f__Omphalotaceae;g__Lentinula;s__Lentinula_edodes	1.68e-06	0	3.3e-06	0	0	0	0	0	0	0	0	0	0	0	0	0	0	0	0	0	0	0	0	0	5.73e-06	0	3.81e-06	2.94e-06	2.79e-06	5.42e-06	1.68e-06	0	0	0	0	0	0	0	0	0	0	0	0	0	0	0	0	0
k__Fungi;p__Basidiomycota;c__Agaricomycetes;o__Agaricales;f__Physalacriaceae;g__Armillaria;s__Armillaria_gallica	0	0	0	0	0	2.17e-06	2.12e-06	2.45e-06	0	0	0	0	0	0	2.51e-06	0	0	0	0	0	0	0	0	0	1.47e-06	4.35e-06	0	0	0	1.73e-06	0	0	1.01e-05	0	0	5.35e-06	0	0	0	0	4.8e-06	0	0	0	0	0	0	0
k__Fungi;p__Basidiomycota;c__Agaricomycetes;o__Agaricales;f__Physalacriaceae;g__Armillaria;s__Armillaria_solidipes	0	0	0	0	0	0	0	0	0	0	0	0	0	0	0	0	0	0	0	0	0	0	0	0	0	0	2.58e-06	0	2.51e-06	3.67e-06	1.52e-06	0	0	0	0	0	0	0	0	0	0	0	0	0	0	0	0	0
k__Fungi;p__Basidiomycota;c__Agaricomycetes;o__Agaricales;f__Physalacriaceae;g__Cylindrobasidium;s__Cylindrobasidium_torrendii	0	0	0	0	0	0	0	0	0	0	0	0	0	0	0	0	0	0	0	0	0	0	0	0	0	0	0	0	0	0	0	0	0	6.05e-06	1.59e-06	2.41e-06	4.79e-06	0	0	0	0	0	0	0	0	0	0	0
k__Fungi;p__Basidiomycota;c__Agaricomycetes;o__Agaricales;f__Pleurotaceae;g__Pleurotus;s__Pleurotus_ostreatus	0	0	0	0	0	0	0	0	0	0	0	0	0	0	0	0	0	0	0	0	0	0	0	0	1.34e-06	0	3.03e-06	0	0	0	0	0	0	0	0	0	0	0	0	0	0	0	0	0	0	0	0	0
k__Fungi;p__Basidiomycota;c__Agaricomycetes;o__Agaricales;f__Pleurotaceae;g__Pleurotus;s__Pleurotus_pulmonarius	0	0	4.16e-06	0	6.27e-06	4.28e-06	2.04e-06	2.42e-06	0	0	0	1.7e-06	5.89e-06	0	7.24e-06	0	7.73e-06	4.45e-06	0	3.34e-06	3.93e-06	3.58e-06	2.49e-06	1.53e-06	0	0	1.17e-06	0	3.51e-06	3.42e-06	2.06e-06	0	8.1e-06	2.21e-06	3.49e-06	0	0	3.31e-06	1.53e-06	0	7.11e-06	0	0	0	4.83e-06	2.39e-06	0	0
k__Fungi;p__Basidiomycota;c__Agaricomycetes;o__Agaricales;f__Pluteaceae;g__Pluteus;s__Pluteus_cervinus	4.23e-06	0	2e-06	4.95e-06	6.27e-06	6.42e-06	0	2.42e-06	2e-06	0	0	0	1.47e-06	0	0	1.83e-06	2.43e-06	0	0	0	1.97e-06	0	0	7.64e-06	4.19e-06	0	1.12e-06	7.12e-06	0	0	0	0	4.86e-06	0	0	2.47e-06	7.88e-06	0	3.06e-06	2.82e-06	4.74e-06	0	3.09e-06	0	0	0	5.34e-06	7.8e-06
k__Fungi;p__Basidiomycota;c__Agaricomycetes;o__Agaricales;f__Psathyrellaceae;g__Coprinellus;s__Coprinellus_micaceus	1.75e-06	0	1.73e-06	0	0	0	0	0	0	0	0	0	0	0	0	0	0	0	0	0	0	0	0	0	1.2e-06	0	3.98e-06	3.07e-06	5.53e-06	5.58e-06	0	0	0	0	0	0	0	0	0	0	0	0	0	0	0	0	0	0
k__Fungi;p__Basidiomycota;c__Agaricomycetes;o__Agaricales;f__Psathyrellaceae;g__Coprinopsis;s__Coprinopsis_cinerea	2.46e-06	0	1.97e-06	0	0	0	0	0	2e-06	0	2.16e-06	0	0	1.73e-06	0	3.65e-06	0	2.23e-06	0	0	9.83e-06	1.79e-06	2.49e-06	0	1.9e-06	0	5.59e-06	2.16e-06	2.77e-06	4.41e-06	6.7e-06	0	0	0	0	0	2.63e-06	0	1.53e-06	3.02e-06	0	0	0	0	0	0	0	0
k__Fungi;p__Basidiomycota;c__Agaricomycetes;o__Agaricales;f__Psathyrellaceae;g__Coprinopsis;s__Coprinopsis_marcescibilis	7.3e-06	0	6.11e-06	0	0	0	0	0	0	0	0	0	0	0	0	0	0	0	0	0	0	0	0	0	2.16e-06	0	6.94e-06	1.81e-06	3.03e-06	3.73e-06	6.71e-06	0	0	0	0	0	0	0	0	0	0	0	0	0	0	0	0	0
k__Fungi;p__Basidiomycota;c__Agaricomycetes;o__Agaricales;f__Schizophyllaceae;g__Auriculariopsis;s__Auriculariopsis_ampla	6.84e-06	0	0	0	2.24e-06	0	4.49e-06	5.19e-06	2.15e-06	0	0	0	0	0	0	1.96e-06	0	0	2.07e-06	1.79e-06	0	0	0	1.64e-06	0	0	0	0	0	5.5e-06	2.08e-05	0	3.61e-06	0	3.81e-06	0	0	1.8e-06	9.84e-06	0	0	0	1.66e-06	2.22e-06	0	7.82e-06	3.93e-06	2.09e-06
k__Fungi;p__Basidiomycota;c__Agaricomycetes;o__Agaricales;f__Strophariaceae;g__Psilocybe;s__Psilocybe_cf._subviscida	2.03e-06	0	0	0	0	0	0	0	0	0	0	0	0	0	0	0	0	0	0	0	0	3.44e-06	0	0	0	2.06e-06	0	0	0	0	0	0	6.36e-06	0	0	0	0	0	0	2.9e-06	0	0	0	1.98e-06	0	0	0	1.87e-06
k__Fungi;p__Basidiomycota;c__Agaricomycetes;o__Agaricales;f__Tricholomataceae;g__Laccaria;s__Laccaria_amethystina	0	0	1.06e-06	0	0	0	0	0	0	0	0	0	0	0	0	0	0	0	0	0	0	0	0	0	1.59e-06	0	0	4.99e-06	3.5e-06	0	3.33e-06	0	0	0	0	0	0	0	0	0	0	0	0	0	0	0	0	0
k__Fungi;p__Basidiomycota;c__Agaricomycetes;o__Agaricales;f__unclassified;g__Dendrothele;s__Dendrothele_bispora	2.03e-06	0	3.78e-06	1.69e-06	0	0	2.01e-06	5.61e-06	0	0	0	0	0	0	0	0	4.99e-06	0	0	0	1.89e-06	0	0	0	0	2.06e-06	6.79e-07	5.34e-06	2.48e-06	4.06e-06	6.49e-06	3.2e-06	0	0	0	0	0	0	2.93e-06	0	0	5.81e-06	0	0	0	0	3.49e-06	0
k__Fungi;p__Basidiomycota;c__Agaricomycetes;o__Atheliales;f__Atheliaceae;g__Fibularhizoctonia;s__Fibularhizoctonia_sp._CBS_109695	3.49e-06	0	1.68e-06	0	0	0	0	0	0	0	0	6.99e-07	0	0	0	0	0	0	0	0	0	0	0	0	4.42e-06	0	5.11e-06	7.57e-06	2.48e-06	7.12e-06	1.04e-05	0	0	0	0	0	0	0	0	0	0	0	0	0	0	0	0	0
k__Fungi;p__Basidiomycota;c__Agaricomycetes;o__Atheliales;f__Atheliaceae;g__Piloderma;s__Piloderma_croceum	0	1.41e-06	0	0	2.06e-06	0	0	0	0	0	6.41e-06	1.67e-06	0	0	2.45e-06	1.8e-06	0	2.2e-06	0	3.3e-06	3.88e-06	1.77e-06	2.45e-06	0	2.6e-06	0	9.73e-07	4.51e-06	5.2e-06	3.37e-06	0	3.29e-06	1.63e-06	0	6.9e-06	2.6e-06	0	0	1.51e-06	0	2.34e-06	2.98e-06	0	0	0	0	0	0
k__Fungi;p__Basidiomycota;c__Agaricomycetes;o__Auriculariales;f__Auriculariaceae;g__Auricularia;s__Auricularia_subglabra	1.97e-05	1.28e-05	1.71e-05	2.05e-05	1.59e-05	4.12e-06	2.12e-05	1.45e-05	2.82e-05	8.76e-06	1.67e-05	1.26e-05	3.68e-06	1.36e-05	2.07e-05	1.17e-05	2.36e-05	1.68e-05	1.71e-05	1.45e-05	1.47e-05	1.52e-05	1.82e-05	1.1e-05	9.73e-06	1.89e-05	1e-05	1.95e-05	1.03e-05	8.05e-06	1.67e-05	2.16e-05	1.58e-05	2.46e-05	7.1e-06	2.03e-05	9.05e-06	1.08e-05	1.17e-05	1.87e-05	1.18e-05	2.4e-05	4.16e-06	1.63e-05	1.14e-05	7.56e-06	9.75e-06	1.71e-05
k__Fungi;p__Basidiomycota;c__Agaricomycetes;o__Auriculariales;f__Exidiaceae;g__Exidia;s__Exidia_glandulosa	1.67e-05	6.59e-06	1.41e-05	1.03e-05	1.85e-06	8.59e-06	1.29e-05	7.86e-06	1.02e-05	2.92e-05	1.84e-05	6.52e-06	6.08e-06	3.59e-06	2.2e-05	1.24e-05	4.61e-06	1.12e-05	7.98e-06	4.94e-06	6.8e-06	1.42e-05	1.03e-05	9.95e-06	1.42e-05	1.95e-06	1.35e-05	1.55e-05	1.4e-05	1.24e-05	1.6e-05	6.31e-06	1.8e-05	5.75e-06	8.26e-06	8.63e-06	9.35e-06	6.65e-06	5.54e-06	7.18e-06	6.04e-06	1.53e-05	9.12e-06	9.73e-06	1.23e-05	1.55e-05	6.15e-06	1.44e-05
k__Fungi;p__Basidiomycota;c__Agaricomycetes;o__Boletales;f__Coniophoraceae;g__Coniophora;s__Coniophora_puteana	0	0	0	0	0	0	0	0	0	0	0	0	0	0	0	0	0	0	0	0	0	0	0	0	2.51e-06	0	4.11e-06	1.61e-06	3.38e-06	5.6e-06	0	0	0	0	0	0	0	0	0	0	0	0	0	0	0	0	0	0
k__Fungi;p__Basidiomycota;c__Agaricomycetes;o__Boletales;f__Paxillaceae;g__Hydnomerulius;s__Hydnomerulius_pinastri	3.38e-06	0	0	0	0	0	0	0	5.34e-06	1.94e-06	0	0	0	0	2.21e-06	0	0	0	1.72e-06	0	1.75e-06	0	0	0	1.02e-06	0	1.7e-06	2.63e-06	3.73e-06	1.21e-06	4.51e-06	0	0	0	0	2.35e-06	2.34e-06	0	2.72e-06	5.37e-06	0	0	2.75e-06	0	2.21e-06	0	0	0
k__Fungi;p__Basidiomycota;c__Agaricomycetes;o__Boletales;f__Paxillaceae;g__Paxillus;s__Paxillus_involutus	4.79e-06	0	1.18e-06	0	0	0	0	0	0	0	0	0	0	0	0	0	0	0	0	0	0	0	0	0	3.27e-06	0	4.07e-06	1.05e-06	9.94e-07	1.93e-06	2.4e-06	0	0	0	0	0	0	0	0	0	0	0	0	0	0	0	0	0
k__Fungi;p__Basidiomycota;c__Agaricomycetes;o__Boletales;f__Paxillaceae;g__Paxillus;s__Paxillus_rubicundulus	7.35e-06	7.46e-06	3.62e-06	6.13e-06	7.26e-06	0	9.09e-06	8.4e-06	5.22e-06	7.59e-06	1.32e-05	8.84e-06	1.28e-06	1.21e-05	0	1.11e-05	1.13e-05	9.68e-06	6.7e-06	7.26e-06	5.13e-06	1.87e-05	1.51e-05	9.3e-06	5.02e-06	2.05e-05	4.17e-06	9.48e-06	1.3e-05	7.42e-06	1.25e-05	4.35e-06	8.63e-06	1.15e-05	7.59e-06	6.88e-06	4.56e-06	2.87e-06	2.66e-06	1.31e-05	8.23e-06	7.88e-06	5.36e-06	7.18e-06	1.08e-05	1.45e-05	3.16e-06	3.39e-06
k__Fungi;p__Basidiomycota;c__Agaricomycetes;o__Boletales;f__Pisolithaceae;g__Pisolithus;s__Pisolithus_microcarpus	3.96e-06	0	1.95e-06	0	3.91e-06	4.01e-06	0	2.26e-06	0	0	2.03e-06	9.02e-06	0	0	0	3.42e-06	0	0	0	1.56e-06	3.68e-06	0	0	0	2.71e-06	0	1.12e-06	0	0	0	0	6.24e-06	0	0	0	0	4.91e-06	1.55e-06	0	0	0	0	2.89e-06	1.93e-06	0	0	0	0
k__Fungi;p__Basidiomycota;c__Agaricomycetes;o__Boletales;f__Sclerodermataceae;g__Scleroderma;s__Scleroderma_citrinum	1.31e-06	0	1.29e-06	1.84e-06	0	0	2.18e-06	0	0	0	1.54e-05	0	0	0	0	0	0	0	3.3e-06	0	2.63e-06	1.87e-06	0	0	0	0	8.74e-07	1.15e-06	1.09e-06	3.17e-06	3.52e-06	3.48e-06	0	0	0	5.5e-06	2.74e-06	0	0	0	2.47e-06	3.15e-06	1.61e-06	0	0	0	0	2.03e-06
k__Fungi;p__Basidiomycota;c__Agaricomycetes;o__Boletales;f__Suillaceae;g__Suillus;s__Suillus_luteus	0	1.45e-06	2.11e-06	0	0	0	0	0	6.09e-06	0	4.39e-06	0	0	0	5.03e-06	0	0	4.52e-06	0	3.39e-06	1.99e-06	0	0	0	0	0	7.3e-06	0	0	0	0	0	0	2.24e-06	0	0	0	0	0	0	0	0	0	2.09e-06	0	0	0	3.96e-06
k__Fungi;p__Basidiomycota;c__Agaricomycetes;o__Cantharellales;f__Botryobasidiaceae;g__Botryobasidium;s__Botryobasidium_botryosum	1.04e-05	3.39e-06	7.44e-06	5.48e-06	2.12e-06	6.02e-06	6.81e-06	6.19e-06	7.9e-06	1.49e-05	3.27e-06	1.5e-05	7.15e-06	5.49e-06	1.03e-05	0	1.66e-06	1.26e-05	4.94e-06	8.25e-06	0	8.85e-06	6.69e-06	1.44e-05	9.76e-06	9.2e-06	6.69e-06	9.28e-06	1.69e-06	1.76e-05	6.79e-06	1.07e-06	3.9e-06	1.46e-05	1.97e-05	9.72e-06	5.32e-06	2.73e-06	0	2.21e-05	8.67e-06	7.75e-06	9.88e-07	1.14e-05	8.63e-06	6.13e-06	1.07e-05	9.99e-06
k__Fungi;p__Basidiomycota;c__Agaricomycetes;o__Cantharellales;f__Ceratobasidiaceae;g__Ceratobasidium;s__Ceratobasidium_theobromae	1.03e-06	0	2.24e-06	0	0	2.3e-06	0	2.59e-06	0	0	0	0	0	0	0	0	0	0	0	1.79e-06	0	3.85e-06	0	0	2.81e-06	2.3e-06	4.67e-06	1.07e-05	6.16e-06	8.31e-07	5.16e-06	0	1.78e-06	0	0	0	2.82e-06	0	0	0	0	0	0	0	0	0	0	0
k__Fungi;p__Basidiomycota;c__Agaricomycetes;o__Cantharellales;f__Ceratobasidiaceae;g__Rhizoctonia;s__Rhizoctonia_solani	1.58e-05	0	5.33e-06	5.36e-06	0	0	0	0	0	0	0	0	1.49e-06	0	0	0	0	2.26e-06	0	0	1.99e-06	0	0	1.09e-05	4.04e-06	0	4.69e-06	1.01e-05	9.59e-06	4.02e-06	1.67e-06	0	1.68e-06	0	1.77e-06	0	0	0	0	0	0	0	0	2.09e-06	0	0	1.84e-06	0
k__Fungi;p__Basidiomycota;c__Agaricomycetes;o__Cantharellales;f__Tulasnellaceae;g__Tulasnella;s__Tulasnella_calospora	8.67e-07	4.5e-06	7.44e-06	1.72e-06	0	6.8e-06	1.63e-05	9.79e-06	0	4.62e-06	1.15e-05	0	1.51e-06	5.46e-06	5.17e-06	1.78e-06	2.67e-06	2.29e-06	7.94e-06	8.02e-06	9.79e-06	0	5.13e-06	4.43e-06	7.15e-06	8.79e-06	6.34e-06	3.43e-06	2.63e-06	1.59e-06	6.86e-06	6.56e-06	6.64e-06	6.58e-06	1.68e-06	2.71e-06	0	0	6.47e-06	9.3e-06	9.59e-06	1.5e-05	8.05e-06	6.37e-06	0	4.9e-06	5.44e-06	8.25e-06
k__Fungi;p__Basidiomycota;c__Agaricomycetes;o__Geastrales;f__Sphaerobolaceae;g__Sphaerobolus;s__Sphaerobolus_stellatus	3.84e-06	0	5.7e-06	0	0	0	0	0	0	4.01e-07	0	0	0	0	0	0	0	0	0	0	0	0	0	0	1.06e-05	0	1.34e-05	9.86e-06	1.05e-05	1.16e-05	1.32e-05	0	0	0	0	0	0	0	0	0	0	0	0	0	0	0	0	0
k__Fungi;p__Basidiomycota;c__Agaricomycetes;o__Gloeophyllales;f__Gloeophyllaceae;g__Gloeophyllum;s__Gloeophyllum_trabeum	0	0	1.04e-05	1.24e-06	2.42e-06	0	1.25e-05	0	3.05e-06	2.18e-06	2.16e-06	0	2.94e-06	0	0	5.48e-06	1.71e-07	1.34e-05	1.06e-06	0	0	2.79e-06	0	1.53e-06	1.45e-06	2.14e-06	6.57e-07	2.15e-06	1.76e-06	1.71e-06	2.12e-06	0	4.97e-06	4.42e-06	1.75e-06	1.32e-05	7.07e-06	0	0	3.02e-06	2.37e-06	9.07e-06	1.54e-06	2.06e-06	2.48e-06	0	0	0
k__Fungi;p__Basidiomycota;c__Agaricomycetes;o__Gloeophyllales;f__Gloeophyllaceae;g__Neolentinus;s__Neolentinus_lepideus	1.18e-05	1.34e-06	1.07e-06	0	0	0	0	0	0	0	0	0	2.75e-06	1.62e-06	0	0	0	2.08e-06	0	0	0	1.68e-06	0	0	5.2e-06	0	4.82e-06	7.72e-06	1.6e-06	2.48e-06	4.12e-06	0	0	6.2e-06	0	2.47e-06	0	1.55e-06	0	0	0	0	0	1.93e-06	2.32e-06	0	0	0
k__Fungi;p__Basidiomycota;c__Agaricomycetes;o__Gloeophyllales;f__unclassified;g__Heliocybe;s__Heliocybe_sulcata	2.08e-06	0	4.77e-06	6.52e-06	0	0	0	2.23e-06	0	4.03e-06	0	1.57e-06	1.36e-06	0	0	3.37e-06	2.4e-06	0	0	1.54e-06	5.45e-06	0	0	0	1.89e-06	0	3.93e-06	1.82e-06	5.75e-07	3.81e-06	1.39e-06	0	0	4.08e-06	0	0	2.43e-06	0	2.82e-06	0	0	0	1.43e-06	1.91e-06	0	0	0	0
k__Fungi;p__Basidiomycota;c__Agaricomycetes;o__Hymenochaetales;f__Hymenochaetaceae;g__Phellinidium;s__Phellinidium_pouzarii	0	0	2.17e-06	0	0	0	0	0	0	0	0	0	0	0	0	0	0	0	0	0	0	0	0	0	0	0	0	0	0	1.03e-05	2.21e-06	0	0	0	0	0	0	0	0	0	0	0	0	0	0	0	0	0
k__Fungi;p__Basidiomycota;c__Agaricomycetes;o__Hymenochaetales;f__Hymenochaetaceae;g__Pyrrhoderma;s__Pyrrhoderma_noxium	1.53e-06	0	0	0	0	0	0	0	0	0	0	0	0	0	0	0	0	0	0	0	0	0	0	0	1.76e-06	0	8.67e-07	3.17e-06	3e-06	4.94e-06	3.14e-06	0	0	0	0	0	0	0	0	0	0	0	0	0	0	0	0	0
k__Fungi;p__Basidiomycota;c__Agaricomycetes;o__Hymenochaetales;f__Hymenochaetaceae;g__Sanghuangporus;s__Sanghuangporus_baumii	0	0	1.75e-06	1.48e-06	0	1.8e-06	1.76e-06	0	0	0	0	0	1.23e-06	0	0	0	2.18e-06	1.87e-06	0	0	1.65e-06	1.5e-06	0	0	0	0	0	0	1.47e-06	1.43e-06	0	0	0	0	0	0	0	0	0	0	0	0	1.29e-06	0	0	2.01e-06	4.58e-06	0
k__Fungi;p__Basidiomycota;c__Agaricomycetes;o__Hymenochaetales;f__Schizoporaceae;g__Schizopora;s__Schizopora_paradoxa	0	0	0	0	0	4.22e-06	2.06e-06	0	1.97e-06	0	0	0	0	5.13e-06	2.45e-06	0	0	0	0	4.94e-06	1.94e-06	0	0	0	5.7e-06	0	0	0	0	0	0	0	0	4.36e-06	0	0	0	0	1.51e-06	0	0	0	3.04e-06	0	7.35e-06	0	0	0
k__Fungi;p__Basidiomycota;c__Agaricomycetes;o__Hymenochaetales;f__unclassified;g__Rickenella;s__Rickenella_mellea	0	1.37e-06	1.51e-06	1.69e-06	2.01e-06	0	2.01e-06	0	0	0	0	0	2.83e-06	1.67e-06	0	0	0	6.42e-06	0	0	0	0	2.39e-06	0	2.89e-06	0	1.47e-06	4.47e-06	3.25e-06	4.22e-06	3.51e-06	0	0	0	0	2.53e-06	0	0	0	0	0	0	0	0	0	0	0	0
k__Fungi;p__Basidiomycota;c__Agaricomycetes;o__Jaapiales;f__Jaapiaceae;g__Jaapia;s__Jaapia_argillacea	1.89e-06	0	4.41e-06	4.93e-06	0	2.03e-06	0	4.58e-06	0	2.07e-06	2.05e-06	0	3.71e-06	1.64e-06	0	0	4.93e-06	0	5.49e-06	3.17e-06	7.46e-06	0	2.36e-06	1.45e-06	6.29e-06	8.13e-06	5.41e-06	2.77e-06	5.7e-06	1.52e-06	1.08e-05	7.9e-06	3.14e-06	0	5.93e-06	0	2.49e-06	0	0	0	0	0	4.39e-06	4.88e-06	2.35e-06	0	0	0
k__Fungi;p__Basidiomycota;c__Agaricomycetes;o__Polyporales;f__Dacryobolaceae;g__Postia;s__Postia_placenta	3.07e-06	0	2.52e-06	0	0	0	0	0	0	0	0	0	0	0	0	0	0	0	0	0	0	0	0	0	1.04e-05	0	1.94e-06	5.98e-06	9.07e-06	5.92e-06	5.13e-06	0	0	0	0	0	0	0	0	0	0	0	0	0	0	0	0	0
k__Fungi;p__Basidiomycota;c__Agaricomycetes;o__Polyporales;f__Fomitopsidaceae;g__Fomitopsis;s__Fomitopsis_rosea	8.57e-06	5.25e-06	1.21e-05	6.94e-06	8.52e-06	8.73e-06	1.11e-05	2.96e-06	4.9e-06	4.45e-06	6.18e-06	9.68e-06	4.2e-06	6.36e-06	4.41e-06	5.64e-06	6.36e-06	4.54e-06	6.29e-06	8.86e-06	5.61e-06	8.77e-06	2.03e-06	6.24e-06	8.6e-06	1.49e-05	1.15e-05	1.58e-05	1.43e-06	6.96e-06	8.65e-07	5.44e-06	6.08e-06	6.3e-06	3.56e-06	3.23e-06	9.64e-06	2.97e-06	4.98e-06	3.69e-06	1.06e-05	1.36e-05	6.59e-06	5.89e-06	3.04e-06	5.85e-06	8.15e-06	5.57e-06
k__Fungi;p__Basidiomycota;c__Agaricomycetes;o__Polyporales;f__Gelatoporiaceae;g__Gelatoporia;s__Gelatoporia_subvermispora	3.24e-06	0	4.5e-06	0	0	0	0	0	0	0	0	0	2.59e-06	1.53e-06	0	0	0	0	0	7.35e-06	0	0	0	1.34e-06	2.28e-05	0	1.76e-05	1.04e-05	1.3e-05	1.98e-05	1.57e-05	0	0	4.2e-06	5.11e-06	0	2.31e-06	0	0	0	0	0	0	0	2.18e-06	0	0	0
k__Fungi;p__Basidiomycota;c__Agaricomycetes;o__Polyporales;f__Gelatoporiaceae;g__Obba;s__Obba_rivulosa	0	0	0	0	0	0	0	0	0	0	0	0	0	0	0	0	0	0	0	0	0	0	0	0	0	0	3.94e-06	3.04e-06	3.35e-06	0	6.93e-06	0	0	0	0	0	0	0	0	0	0	0	0	0	0	0	0	0
k__Fungi;p__Basidiomycota;c__Agaricomycetes;o__Polyporales;f__Laetiporaceae;g__Laetiporus;s__Laetiporus_sulphureus	0	0	1.88e-06	0	7.53e-06	0	0	0	0	0	0	0	0	0	0	1.65e-06	0	2.01e-06	3.48e-06	0	0	0	0	0	2.61e-06	0	0	0	0	0	0	0	1.49e-06	0	6.3e-06	0	0	1.49e-06	6.88e-06	0	0	0	0	0	2.24e-06	0	0	0
k__Fungi;p__Basidiomycota;c__Agaricomycetes;o__Polyporales;f__Laetiporaceae;g__Wolfiporia;s__Wolfiporia_cocos	0	0	0	3.43e-06	0	0	0	0	5.84e-06	0	0	0	4.3e-06	0	0	0	0	6.5e-06	1.88e-06	1.63e-06	1.91e-06	0	4.84e-06	1.49e-06	0	2.09e-06	0	0	0	6.65e-06	2.06e-06	1.62e-06	0	2.15e-06	1.7e-06	0	2.56e-06	3.22e-06	2.97e-06	0	0	0	0	2.01e-06	0	2.33e-06	0	0
k__Fungi;p__Basidiomycota;c__Agaricomycetes;o__Polyporales;f__Phanerochaetaceae;g__Phanerochaete;s__Phanerochaete_pseudomagnoliae	2.43e-05	0	3.76e-05	0	0	0	0	0	0	0	0	0	0	0	0	0	0	0	0	0	0	0	0	0	5.35e-05	0	3.31e-05	2.8e-05	4.92e-05	4.96e-05	4.95e-05	0	0	0	0	0	0	0	0	0	0	0	0	0	0	0	0	0
k__Fungi;p__Basidiomycota;c__Agaricomycetes;o__Polyporales;f__Phanerochaetaceae;g__Phlebiopsis;s__Phlebiopsis_gigantea	9.21e-06	0	1.11e-05	1.65e-06	1.96e-06	0	0	2.26e-06	3.75e-06	0	0	0	0	0	2.32e-06	5.13e-06	0	0	5.41e-06	1.56e-06	0	0	0	0	1.29e-05	0	1.71e-05	2e-05	1.5e-05	1.1e-05	1.2e-05	1.56e-06	0	0	0	2.47e-06	4.91e-06	1.55e-06	0	0	0	0	0	1.93e-06	2.32e-06	0	0	1.83e-06
k__Fungi;p__Basidiomycota;c__Agaricomycetes;o__Polyporales;f__Polyporaceae;g__Dichomitus;s__Dichomitus_squalens	0	5.37e-06	0	0	0	0	0	0	0	0	0	0	0	0	0	0	0	2.36e-06	0	0	0	0	0	0	0	2.27e-06	0	0	0	5.42e-06	0	0	1.75e-06	0	0	0	0	0	0	0	2.51e-06	0	0	0	0	0	1.92e-06	0
k__Fungi;p__Basidiomycota;c__Agaricomycetes;o__Polyporales;f__Polyporaceae;g__Ganoderma;s__Ganoderma_sinense	2.2e-06	0	0	0	0	0	2.18e-06	0	1.04e-05	0	0	0	1.53e-06	3.62e-06	2.58e-06	1.9e-06	0	2.32e-06	0	1.74e-06	0	0	0	0	3.01e-06	0	7.51e-06	1.93e-06	1.83e-06	1.78e-06	2.21e-06	1.74e-06	1.73e-06	0	0	0	2.74e-06	0	0	6.29e-06	7.41e-06	3.15e-06	4.83e-06	0	2.59e-06	9.98e-06	0	0
k__Fungi;p__Basidiomycota;c__Agaricomycetes;o__Polyporales;f__Polyporaceae;g__Lentinus;s__Lentinus_tigrinus	1.61e-06	1.09e-06	1.58e-06	1.34e-06	1.59e-06	1.63e-06	0	0	0	0	3.29e-06	0	0	3.96e-06	5.65e-06	4.16e-06	5.93e-06	0	0	0	7.48e-06	1.36e-06	1.89e-06	1.16e-06	3.3e-06	0	1.92e-06	4.66e-06	0	1.3e-06	3.39e-06	0	0	1.68e-06	0	0	2e-06	0	1.16e-06	0	1.8e-06	0	0	3.14e-06	1.89e-06	0	0	1.48e-06
k__Fungi;p__Basidiomycota;c__Agaricomycetes;o__Polyporales;f__Polyporaceae;g__Trametes;s__Trametes_cinnabarina	1.03e-05	0	1.01e-05	3.43e-06	4.07e-06	1.25e-05	1.43e-05	4.71e-06	3.9e-06	2.12e-06	4.21e-06	3.3e-06	1.43e-06	1.69e-06	4.83e-06	1.78e-06	5.06e-06	2.17e-06	3.75e-06	6.5e-06	3.83e-06	5.23e-06	7.26e-06	7.44e-06	2.81e-06	0	2.34e-06	5.41e-06	6.84e-06	3.32e-06	4.13e-06	0	1.61e-06	6.45e-06	0	2.57e-06	1.28e-05	1.61e-06	1.49e-06	2.94e-06	2.31e-06	0	4.51e-06	4.02e-06	2.42e-06	4.66e-06	7.08e-06	7.59e-06
k__Fungi;p__Basidiomycota;c__Agaricomycetes;o__Polyporales;f__Polyporaceae;g__Trametes;s__Trametes_coccinea	1.68e-06	0	7.67e-06	0	0	0	0	0	0	0	0	6.73e-07	0	0	2.62e-06	0	2.75e-06	0	0	0	2.08e-06	0	0	1.62e-06	3.17e-06	0	3.76e-06	1.01e-05	2.48e-06	1.42e-06	3.65e-06	0	0	0	0	0	2.78e-06	0	0	0	0	0	0	0	0	0	0	0
k__Fungi;p__Basidiomycota;c__Agaricomycetes;o__Polyporales;f__Sparassidaceae;g__Sparassis;s__Sparassis_crispa	3.79e-06	0	1.57e-06	0	0	0	0	0	0	0	0	0	0	0	0	0	0	0	0	0	0	0	0	0	2.18e-06	0	9.03e-07	0	3.96e-06	1.29e-06	1.6e-06	0	0	0	0	0	0	0	0	0	0	0	0	0	0	0	0	0
k__Fungi;p__Basidiomycota;c__Agaricomycetes;o__Polyporales;f__Steccherinaceae;g__Steccherinum;s__Steccherinum_ochraceum	0	0	0	0	0	0	0	0	0	0	0	1.7e-06	0	0	0	0	0	0	0	0	0	0	0	0	1.45e-06	2.14e-06	0	5.56e-06	7.02e-06	0	2.12e-06	0	1.66e-06	0	0	0	0	0	0	0	2.37e-06	0	0	2.06e-06	0	7.18e-06	3.64e-06	0
k__Fungi;p__Basidiomycota;c__Agaricomycetes;o__Polyporales;f__unclassified;g__Fibroporia;s__Fibroporia_radiculosa	8.46e-06	0	0	1.76e-06	2.09e-06	0	6.28e-06	7.61e-06	0	4.37e-06	2.32e-06	6.78e-06	1.58e-06	5.58e-06	2.66e-06	9.4e-06	5.2e-06	0	0	7.17e-06	1.97e-06	0	0	0	0	4.29e-06	2.4e-06	7.41e-06	0	3.42e-06	1.08e-05	0	8.28e-06	2.21e-06	5.24e-06	7.92e-06	2.63e-06	1.65e-06	4.58e-06	0	0	0	1.54e-06	0	2.48e-06	4.78e-06	1.82e-06	1.95e-06
k__Fungi;p__Basidiomycota;c__Agaricomycetes;o__Russulales;f__Bondarzewiaceae;g__Bondarzewia;s__Bondarzewia_mesenterica	0	0	1.88e-06	0	0	0	0	0	0	0	0	0	0	0	0	0	0	0	0	0	0	0	0	0	0	0	0	0	0	4.62e-06	0	0	0	0	0	0	0	0	0	0	0	0	0	0	0	0	0	0
k__Fungi;p__Basidiomycota;c__Agaricomycetes;o__Russulales;f__Bondarzewiaceae;g__Heterobasidion;s__Heterobasidion_irregulare	1.04e-06	0	1.02e-06	0	0	0	0	0	0	0	0	0	0	0	0	0	0	0	0	0	0	0	0	0	7.08e-07	0	3.53e-06	9.08e-07	8.6e-07	0	1.04e-06	0	0	0	0	0	0	0	0	0	0	0	0	0	0	0	0	0
k__Fungi;p__Basidiomycota;c__Agaricomycetes;o__Russulales;f__Hericiaceae;g__Dentipellis;s__Dentipellis_fragilis	1.56e-06	0	0	0	0	0	0	0	0	0	0	0	0	0	0	0	0	0	0	0	0	0	0	0	3.75e-06	0	2.75e-06	1.37e-06	2.19e-06	0	1.16e-05	0	0	0	0	0	0	0	0	0	0	0	0	0	0	0	0	0
k__Fungi;p__Basidiomycota;c__Agaricomycetes;o__Russulales;f__Hericiaceae;g__Dentipellis;s__Dentipellis_sp._KUC8613	0	0	1.33e-06	0	0	0	0	0	0	0	0	0	0	0	0	0	0	0	0	0	0	0	0	0	0	0	1.54e-06	0	0	0	4.08e-06	0	0	0	0	0	0	0	0	0	0	0	0	0	0	0	0	0
k__Fungi;p__Basidiomycota;c__Agaricomycetes;o__Russulales;f__Hericiaceae;g__Hericium;s__Hericium_alpestre	3.13e-06	0	1.54e-06	0	0	0	0	0	5.69e-06	0	0	1.61e-06	0	1.64e-06	0	1.73e-06	2.46e-06	0	0	3.17e-06	0	0	0	0	1.15e-05	0	9.22e-06	5.63e-06	7.62e-06	4e-06	1e-05	1.58e-06	3.14e-06	0	0	0	0	0	0	5.72e-06	0	0	4.39e-06	0	0	2.27e-06	0	0
k__Fungi;p__Basidiomycota;c__Agaricomycetes;o__Russulales;f__Peniophoraceae;g__Peniophora;s__Peniophora_sp._CBMAI_1063	0	0	0	0	0	0	0	0	0	0	0	0	0	0	0	0	0	0	0	0	0	0	0	0	0	0	1.29e-06	0	0	1.83e-06	6.83e-06	0	0	0	0	0	0	0	0	0	0	0	0	0	0	0	0	0
k__Fungi;p__Basidiomycota;c__Agaricomycetes;o__Russulales;f__Peniophoraceae;g__Peniophora;s__Peniophora_sp._CONT	2.14e-06	4.35e-06	2.11e-06	8.94e-06	2.12e-06	0	0	7.35e-06	8.12e-06	0	0	1.72e-06	0	0	0	3.7e-06	0	0	0	0	0	0	2.52e-06	1.55e-06	1.47e-06	0	3.91e-06	1.88e-06	1.78e-06	0	1.38e-06	0	1.68e-06	0	0	1.07e-05	0	0	0	0	2.4e-06	6.13e-06	0	0	0	2.42e-06	3.69e-06	0
k__Fungi;p__Basidiomycota;c__Agaricomycetes;o__Russulales;f__Stereaceae;g__Stereum;s__Stereum_hirsutum	0	0	0	1.74e-06	0	0	0	0	0	0	0	0	1.45e-06	0	0	9e-06	0	0	0	0	0	0	0	0	1.43e-06	0	2.37e-06	0	0	1.68e-06	0	0	0	0	0	0	0	0	0	0	0	0	0	0	0	0	0	1.92e-06
k__Fungi;p__Basidiomycota;c__Agaricomycetes;o__Sebacinales;f__Serendipitaceae;g__Serendipita;s__Serendipita_indica	3.72e-06	0	2.64e-06	0	0	0	0	0	0	0	0	0	0	0	0	0	0	0	0	0	0	0	0	0	8.31e-06	0	9.61e-06	8.86e-06	6.82e-06	6.93e-06	4.84e-06	0	0	0	0	0	0	0	0	0	0	0	0	0	0	0	0	0
k__Fungi;p__Basidiomycota;c__Agaricomycetes;o__Sebacinales;f__Serendipitaceae;g__Serendipita;s__Serendipita_vermifera	8.51e-06	4.68e-06	0	0	0	0	0	0	7.79e-06	0	0	0	0	0	0	0	2.53e-06	0	0	0	0	0	0	0	2.81e-06	2.34e-06	9.27e-06	0	0	9.1e-06	6.19e-06	0	1.8e-06	0	0	0	2.56e-06	1.8e-06	2.97e-06	0	2.31e-06	0	0	0	0	0	1.77e-06	0
k__Fungi;p__Basidiomycota;c__Agaricomycetes;o__Trechisporales;f__Hydnodontaceae;g__Sistotremastrum;s__Sistotremastrum_niveocremeum	0	0	0	0	0	0	0	0	0	0	0	0	0	0	0	0	0	0	0	0	0	0	0	0	0	0	0	1.47e-06	0	1.35e-06	6.73e-06	0	0	0	0	0	0	0	0	0	0	0	0	0	0	0	0	0
k__Fungi;p__Basidiomycota;c__Dacrymycetes;o__Dacrymycetales;f__Dacrymycetaceae;g__Calocera;s__Calocera_cornea	0	0	3.86e-06	0	0	0	0	0	0	0	0	0	0	0	0	0	0	0	0	0	0	0	0	0	3.58e-06	0	5.19e-06	1.03e-05	3.26e-06	5.28e-06	3.94e-06	0	0	0	0	0	0	0	0	0	0	0	0	0	0	0	0	0
k__Fungi;p__Basidiomycota;c__Dacrymycetes;o__Dacrymycetales;f__Dacrymycetaceae;g__Calocera;s__Calocera_viscosa	6.92e-07	4.02e-06	1.95e-06	0	0	2e-06	0	2.26e-06	7.69e-06	0	0	3.26e-06	0	1.67e-06	4.64e-06	0	0	0	0	1.56e-06	0	1.72e-06	0	0	3.62e-06	0	1.95e-06	5.96e-06	1.69e-06	6.93e-06	8.61e-06	1.6e-06	0	4.13e-06	0	0	2.52e-06	9.45e-06	2.86e-06	0	0	2.83e-06	0	0	4.65e-06	0	1.75e-06	3.75e-06
k__Fungi;p__Basidiomycota;c__Dacrymycetes;o__Dacrymycetales;f__Dacrymycetaceae;g__Dacryopinax;s__Dacryopinax_primogenitus	1.01e-05	0	1.41e-05	2.93e-06	0	1.78e-06	0	0	1.66e-06	5.43e-06	3.59e-06	0	0	0	2.06e-06	8.71e-07	4.31e-06	1.85e-06	1.6e-06	0	0	2.97e-06	0	0	7.91e-06	1.78e-06	5.15e-06	1.06e-05	5.86e-06	4.68e-06	8.32e-06	0	1.37e-06	0	0	0	6.53e-06	0	5.07e-06	0	0	0	3.84e-06	6.85e-06	0	0	0	0
k__Fungi;p__Basidiomycota;c__Exobasidiomycetes;o__Ceraceosorales;f__Ceraceosoraceae;g__Ceraceosorus;s__Ceraceosorus_guamensis	0	0	0	0	0	0	0	0	0	0	0	0	0	0	0	0	0	0	0	0	0	0	0	0	0	0	3.5e-06	0	7.71e-07	6.96e-06	6.55e-06	0	0	0	0	0	0	0	0	0	0	0	0	0	0	0	0	0
k__Fungi;p__Basidiomycota;c__Exobasidiomycetes;o__Entylomatales;f__unclassified;g__Tilletiopsis;s__Tilletiopsis_washingtonensis	1.39e-06	0	1.07e-05	0	0	0	0	0	0	0	0	0	0	0	0	0	0	0	0	0	0	0	0	0	0	0	2.85e-06	5.68e-06	2.84e-06	0	1.7e-06	0	0	0	0	0	0	0	0	0	0	0	0	0	0	0	0	0
k__Fungi;p__Basidiomycota;c__Exobasidiomycetes;o__Exobasidiales;f__Brachybasidiaceae;g__Meira;s__Meira_miltonrushii	1.82e-06	0	6.3e-06	2.55e-06	0	1.55e-06	3.02e-06	0	1.45e-06	0	3.13e-06	1.23e-06	0	3.76e-06	0	0	3.76e-06	1.61e-06	0	0	0	0	0	0	0	0	1.9e-06	0	5.79e-06	5.87e-06	0	3.61e-06	1.2e-06	4.79e-06	1.26e-06	0	0	1.19e-06	0	0	0	0	1.12e-06	1.49e-06	1.26e-05	0	0	0
k__Fungi;p__Basidiomycota;c__Exobasidiomycetes;o__Exobasidiales;f__Cryptobasidiaceae;g__Acaromyces;s__Acaromyces_ingoldii	3.76e-06	1.54e-06	0	3.79e-06	4.49e-06	0	0	1.3e-05	0	0	0	0	0	0	0	0	0	2.39e-06	0	1.79e-06	2.11e-06	0	0	0	4.2e-06	0	7.59e-06	5.21e-06	1.31e-06	1.83e-06	2.37e-06	0	0	0	0	0	0	3.55e-06	1.64e-06	0	0	0	0	0	0	0	1.95e-06	0
k__Fungi;p__Basidiomycota;c__Exobasidiomycetes;o__Georgefischeriales;f__Tilletiariaceae;g__Tilletiaria;s__Tilletiaria_anomala	0	0	0	1.89e-06	0	2.3e-06	4.49e-06	0	0	0	0	0	0	1.86e-06	0	3.92e-06	2.79e-06	0	2.07e-06	0	0	0	0	0	2.3e-06	0	0	1.38e-06	1.41e-05	3.82e-06	6.98e-06	1.79e-06	1.07e-05	0	1.88e-06	0	0	0	0	0	2.54e-06	0	1.66e-06	0	0	0	0	0
k__Fungi;p__Basidiomycota;c__Exobasidiomycetes;o__Microstromatales;f__unclassified;g__Pseudomicrostroma;s__Pseudomicrostroma_glucosiphilum	0	7.57e-06	0	7.46e-06	1.11e-05	0	0	5.11e-06	2.18e-06	2.31e-06	0	1.79e-06	0	0	5.24e-06	0	0	7.07e-06	0	0	0	1.9e-06	5.26e-06	1.62e-06	6.12e-06	4.54e-06	5.23e-06	0	1.86e-06	0	0	3.53e-06	1.75e-06	0	1.9e-06	2.79e-06	0	5.3e-06	1.62e-06	6.38e-06	5.01e-06	3.2e-06	3.27e-06	0	5.41e-06	0	7.81e-06	6.19e-06
k__Fungi;p__Basidiomycota;c__Exobasidiomycetes;o__Tilletiales;f__Tilletiaceae;g__Tilletia;s__Tilletia_caries	3.86e-06	0	1.9e-06	6.57e-06	0	2.11e-06	0	4.59e-06	1.97e-06	0	0	0	0	1.71e-06	0	1.8e-06	2.37e-06	0	1.9e-06	0	3.59e-06	3.54e-06	0	4.3e-06	1.32e-06	0	3.28e-06	0	0	0	0	0	0	0	0	9.63e-06	0	0	1.39e-06	0	2.16e-06	8.73e-06	1.52e-06	0	2.27e-06	0	1.2e-05	8.9e-06
k__Fungi;p__Basidiomycota;c__Exobasidiomycetes;o__Tilletiales;f__Tilletiaceae;g__Tilletia;s__Tilletia_walkeri	0	0	0	1.79e-06	2.12e-06	0	4.24e-06	0	5.82e-06	0	2.05e-06	0	0	0	0	1.28e-05	0	0	5.74e-06	1.58e-06	0	0	0	0	1.37e-06	2.17e-06	2.27e-06	0	0	3.35e-06	0	3.16e-06	0	1.47e-05	0	0	0	0	2.9e-06	2.86e-06	2.25e-06	0	1.56e-06	0	0	0	0	1.85e-06
k__Fungi;p__Basidiomycota;c__Malasseziomycetes;o__Malasseziales;f__Malasseziaceae;g__Malassezia;s__Malassezia_globosa	0	0	3.45e-06	0	0	0	0	0	0	0	0	0	0	0	0	0	0	0	0	0	0	0	0	0	3.6e-06	0	0	9.22e-06	1.46e-06	1.42e-06	1.06e-05	0	0	0	0	0	0	0	0	0	0	0	0	0	0	0	0	0
k__Fungi;p__Basidiomycota;c__Malasseziomycetes;o__Malasseziales;f__Malasseziaceae;g__Malassezia;s__Malassezia_pachydermatis	0	0	1.35e-06	1.65e-06	1.96e-06	0	4.17e-06	0	0	0	0	1.79e-06	5.51e-06	1.83e-06	0	0	0	0	4.08e-06	0	1.84e-06	1.9e-06	2.63e-06	0	4.93e-06	0	9.52e-07	4.13e-06	1.1e-05	8.71e-06	0	0	0	0	0	1.12e-05	0	0	0	2.82e-06	0	0	1.63e-06	3.86e-06	0	2.53e-06	3.62e-06	0
k__Fungi;p__Basidiomycota;c__Malasseziomycetes;o__Malasseziales;f__Malasseziaceae;g__Malassezia;s__Malassezia_restricta	8.12e-06	0	0	0	0	4.28e-06	2.09e-06	0	0	0	0	0	0	0	0	0	0	4.45e-06	0	0	0	0	2.49e-06	0	7.11e-06	0	1.92e-06	0	0	1.64e-06	0	0	0	2.21e-06	0	0	2.63e-06	0	4.58e-06	0	0	0	0	0	0	0	0	0
k__Fungi;p__Basidiomycota;c__Microbotryomycetes;o__Leucosporidiales;f__Leucosporidiaceae;g__Leucosporidium;s__Leucosporidium_creatinivorum	7.62e-06	0	0	0	2.24e-06	1.93e-06	0	0	3.95e-06	0	4.27e-06	1.82e-06	0	1.49e-05	0	7.84e-06	2.34e-06	0	0	4.52e-06	0	0	0	4.13e-06	0	1.04e-05	0	0	3.16e-06	1.83e-06	1.91e-06	3.29e-06	1.49e-06	2.37e-06	0	0	0	0	1.38e-06	0	2.13e-06	0	4.17e-06	8.51e-06	0	0	5.23e-06	1.76e-06
k__Fungi;p__Basidiomycota;c__Microbotryomycetes;o__Microbotryales;f__Microbotryaceae;g__Microbotryum;s__Microbotryum_intermedium	2.22e-05	5.42e-06	1.73e-05	9.9e-06	2.61e-06	6.04e-06	3.92e-06	4.52e-06	2.5e-06	1.36e-06	2.05e-06	1.61e-06	1.84e-06	0	1.55e-06	5.15e-06	3.24e-06	2.78e-06	0	0	3.09e-06	1.12e-06	6.3e-06	7.63e-06	4.77e-05	9.36e-06	2.94e-05	3.39e-05	2.85e-05	3.38e-05	4.49e-05	1.04e-06	2.07e-06	1.38e-06	2.18e-06	1.65e-06	1.64e-06	0	6.21e-06	0	2.25e-06	0	0	4.53e-06	5.45e-06	4.48e-06	0	1.22e-06
k__Fungi;p__Basidiomycota;c__Microbotryomycetes;o__Microbotryales;f__Microbotryaceae;g__Microbotryum;s__Microbotryum_saponariae	0	0	0	0	0	0	0	0	0	0	0	0	0	0	0	0	0	0	0	0	0	0	0	0	0	0	0	0	0	0	5.74e-06	0	0	0	0	0	0	0	0	0	0	0	0	0	0	0	0	0
k__Fungi;p__Basidiomycota;c__Microbotryomycetes;o__Sporidiobolales;f__Sporidiobolaceae;g__Rhodotorula;s__Rhodotorula_diobovata	0	1.24e-06	0	0	1.82e-06	0	1.82e-06	0	0	0	0	0	0	1.51e-06	0	0	0	3.87e-06	0	5.81e-06	1.71e-06	0	0	6.64e-06	0	1.86e-06	0	0	0	0	0	1.45e-06	0	1.92e-06	0	0	0	0	0	0	0	0	0	1.79e-06	0	0	0	0
k__Fungi;p__Basidiomycota;c__Microbotryomycetes;o__Sporidiobolales;f__Sporidiobolaceae;g__Rhodotorula;s__Rhodotorula_graminis	1.95e-06	1.32e-06	2.2e-06	0	0	1.98e-06	0	0	1.85e-06	0	0	0	0	0	0	3.86e-06	5.15e-06	0	0	3.31e-06	7.27e-06	1.9e-06	0	0	1.04e-05	1.98e-06	1.9e-06	0	2.85e-06	0	5.34e-06	0	1.53e-06	0	0	8.02e-06	1.11e-05	0	0	3.19e-06	0	0	0	5.72e-06	2.29e-06	1.11e-05	0	4.13e-06
k__Fungi;p__Basidiomycota;c__Microbotryomycetes;o__Sporidiobolales;f__Sporidiobolaceae;g__Rhodotorula;s__Rhodotorula_sp._JG-1b	0	0	1.55e-06	0	0	0	0	0	0	0	0	0	0	0	0	0	0	0	0	0	0	0	0	0	0	0	0	0	0	3.82e-06	0	0	0	0	0	0	0	0	0	0	0	0	0	0	0	0	0	0
k__Fungi;p__Basidiomycota;c__Microbotryomycetes;o__Sporidiobolales;f__Sporidiobolaceae;g__Rhodotorula;s__Rhodotorula_taiwanensis	0	0	0	0	4.42e-06	2.27e-06	0	2.56e-06	0	0	0	0	0	1.83e-06	0	3.86e-06	0	0	0	1.77e-06	4.16e-06	1.9e-06	0	4.85e-06	1.53e-06	0	0	5.88e-06	0	0	2.24e-06	0	0	0	0	0	5.56e-06	0	0	0	0	0	1.63e-06	0	0	0	0	0
k__Fungi;p__Basidiomycota;c__Microbotryomycetes;o__Sporidiobolales;f__Sporidiobolaceae;g__Rhodotorula;s__Rhodotorula_toruloides	4.2e-06	1.41e-06	4.35e-06	1.93e-05	0	2.14e-06	0	0	2e-06	6.52e-06	0	3.41e-06	2.94e-06	5.23e-06	1.24e-05	1.28e-05	4.24e-06	6.78e-06	1.9e-06	3.39e-06	0	0	1.01e-05	3.02e-06	6.88e-06	4.23e-06	8.29e-06	1.03e-05	4.58e-06	1.2e-05	5.31e-06	1.09e-05	1e-05	8.85e-06	0	5.28e-06	2.66e-06	4.98e-06	3.03e-06	3.06e-06	2.34e-06	6.13e-06	0	1.47e-05	2.52e-06	0	1.79e-06	3.9e-06
k__Fungi;p__Basidiomycota;c__Mixiomycetes;o__Mixiales;f__Mixiaceae;g__Mixia;s__Mixia_osmundae	1.59e-06	0	0	0	1.91e-06	0	0	0	0	1.99e-06	1.98e-06	0	0	1.58e-06	4.52e-06	0	0	0	0	0	0	6.54e-06	0	0	0	0	1.81e-06	1.69e-06	1.32e-06	3.86e-06	1.6e-06	0	3.02e-06	0	3.36e-06	7.6e-06	0	0	0	0	0	2.76e-06	2.82e-06	0	2.27e-06	0	0	0
k__Fungi;p__Basidiomycota;c__Pucciniomycetes;o__Pucciniales;f__Melampsoraceae;g__Melampsora;s__Melampsora_larici-populina	1.75e-06	0	6.57e-06	0	0	0	2.18e-06	0	4.17e-06	2.28e-06	0	0	0	0	2.58e-06	0	0	4.65e-06	0	0	0	0	0	0	0	0	5.88e-06	1.54e-06	7.32e-06	5.46e-06	1.76e-06	3.48e-06	0	0	0	0	0	0	3.19e-06	1.42e-05	0	0	3.22e-06	4.31e-06	0	0	0	0
k__Fungi;p__Basidiomycota;c__Pucciniomycetes;o__Pucciniales;f__Pucciniaceae;g__Puccinia;s__Puccinia_coronata	9.88e-06	0	1.68e-05	0	0	0	0	2.21e-06	0	0	3.95e-06	0	1.07e-05	1.76e-06	0	0	4.74e-06	0	0	0	5.38e-06	5.27e-06	0	0	1.36e-05	0	1.05e-05	1.13e-05	1.01e-05	1.27e-05	1.77e-05	0	0	0	1.77e-06	0	4.79e-06	6.7e-06	0	5.81e-06	0	2.76e-06	1.41e-06	0	2.52e-06	0	0	0
k__Fungi;p__Basidiomycota;c__Pucciniomycetes;o__Pucciniales;f__Pucciniaceae;g__Puccinia;s__Puccinia_graminis	2.17e-06	0	0	0	0	0	0	0	4.12e-06	2.24e-06	4.45e-06	0	3.03e-06	0	0	0	0	0	0	0	0	9.21e-06	5.11e-06	0	2.1e-06	0	4.44e-06	7.28e-06	6.34e-06	7.93e-06	0	1.71e-06	5.11e-06	0	0	0	0	0	0	0	4.87e-06	0	0	0	0	2.46e-06	0	0
k__Fungi;p__Basidiomycota;c__Pucciniomycetes;o__Pucciniales;f__Pucciniaceae;g__Puccinia;s__Puccinia_sorghi	0	0	6.71e-06	0	0	0	1.68e-06	0	0	1.75e-06	0	1.36e-06	0	0	0	4.39e-06	4.17e-06	0	0	0	4.73e-06	7.19e-06	0	0	1.16e-06	0	1.11e-06	1.49e-06	1.88e-06	1.58e-06	1.38e-05	1.34e-06	1.33e-06	1.77e-06	0	0	0	0	1.23e-06	0	0	0	0	0	1.99e-06	1.92e-06	0	3.13e-06
k__Fungi;p__Basidiomycota;c__Pucciniomycetes;o__Pucciniales;f__Pucciniaceae;g__Puccinia;s__Puccinia_striiformis	7.02e-06	0	0	0	0	0	0	0	0	0	0	0	0	0	0	0	0	0	0	0	0	0	0	0	4.5e-06	0	3.4e-06	4.1e-06	4.98e-06	6.02e-06	2.35e-06	0	0	0	0	0	0	0	0	0	0	0	0	0	0	0	0	0
k__Fungi;p__Basidiomycota;c__Pucciniomycetes;o__Pucciniales;f__Pucciniaceae;g__Uromyces;s__Uromyces_hobsonii	3.67e-06	0	1.55e-06	0	0	0	0	0	0	0	0	0	0	0	0	0	0	0	0	0	0	0	0	0	3.88e-06	0	8.34e-06	7.98e-06	6.68e-06	3.87e-06	2.81e-06	0	0	0	0	0	0	0	0	0	0	0	0	0	0	0	0	0
k__Fungi;p__Basidiomycota;c__Pucciniomycetes;o__Pucciniales;f__unclassified;g__Uredo;s__Uredo_sp._DAR75672	0	0	0	3.43e-06	0	6.25e-06	0	0	0	0	0	3.3e-06	0	0	0	0	0	2.17e-06	0	0	0	0	0	1.04e-05	0	0	0	0	0	0	0	0	0	0	0	0	0	0	0	0	0	0	1.5e-06	0	0	6.98e-06	0	0
k__Fungi;p__Basidiomycota;c__Tremellomycetes;o__Cystofilobasidiales;f__Mrakiaceae;g__Phaffia;s__Phaffia_rhodozyma	1.3e-05	1e-05	1.29e-05	6.38e-06	0	7.91e-06	1.05e-05	8.39e-06	1.29e-05	9.23e-06	1.37e-05	2.25e-06	5.19e-06	7.1e-06	1.09e-05	1e-05	1.45e-05	7.39e-06	8.4e-06	1.61e-05	5.63e-06	1.45e-05	9.18e-06	5.29e-06	1.1e-05	1.16e-05	1.07e-05	2.01e-05	1.08e-05	1.44e-05	1.7e-05	6.25e-06	4.67e-06	2.1e-05	1.15e-05	2.52e-05	1.1e-05	8.89e-06	9.99e-06	1.72e-05	0	1.09e-05	5.58e-06	1.39e-05	8.88e-06	9.8e-06	1.81e-05	1.77e-05
k__Fungi;p__Basidiomycota;c__Tremellomycetes;o__Tremellales;f__Cryptococcaceae;g__Cryptococcus;s__Cryptococcus_floricola	0	0	1.45e-06	0	0	0	0	0	0	0	0	0	0	0	0	0	0	0	0	0	0	0	0	0	2.01e-06	0	1.67e-06	2.58e-06	0	3.56e-06	0	0	0	0	0	0	0	0	0	0	0	0	0	0	0	0	0	0
k__Fungi;p__Basidiomycota;c__Tremellomycetes;o__Tremellales;f__Cryptococcaceae;g__Cryptococcus;s__Cryptococcus_gattii_VGIII	0	0	0	0	0	0	0	0	0	0	0	0	0	1.73e-06	0	0	0	0	0	0	1.97e-06	0	0	0	0	0	2.4e-06	0	0	1.71e-06	0	1.67e-06	8.28e-06	0	0	0	0	0	0	0	0	0	0	0	2.48e-06	0	0	1.95e-06
k__Fungi;p__Basidiomycota;c__Tremellomycetes;o__Tremellales;f__Cryptococcaceae;g__Cryptococcus;s__Cryptococcus_neoformans	3.36e-06	0	1.65e-06	5.6e-06	4.97e-06	1.7e-06	0	5.75e-06	1.59e-06	1.73e-06	0	1.35e-06	2.34e-06	0	1.97e-06	1.45e-06	8.25e-06	1.77e-06	3.06e-06	2.65e-06	6.24e-06	1.42e-06	7.89e-06	3.64e-06	0	1.7e-06	9.52e-07	7.35e-06	0	2.71e-06	1.68e-06	7.94e-06	1.31e-06	0	1.39e-06	1.47e-05	0	1.31e-06	8.49e-06	0	1.13e-05	2.4e-06	0	1.64e-06	7.88e-06	0	4.33e-06	3.1e-06
k__Fungi;p__Basidiomycota;c__Tremellomycetes;o__Tremellales;f__Cryptococcaceae;g__Kwoniella;s__Kwoniella_bestiolae	0	0	8.08e-07	0	0	0	0	0	0	0	0	0	0	0	0	0	0	0	0	0	0	0	0	0	1.68e-06	0	4.66e-07	1.44e-06	6.82e-07	1.33e-06	5.77e-06	0	0	0	0	0	0	0	0	0	0	0	0	0	0	0	0	0
k__Fungi;p__Basidiomycota;c__Tremellomycetes;o__Tremellales;f__Cryptococcaceae;g__Kwoniella;s__Kwoniella_heveanensis	1.91e-06	4.4e-06	0	0	3.21e-06	0	0	0	0	0	0	0	0	0	0	0	7.99e-06	0	5.93e-06	0	0	1.38e-06	3.82e-06	0	0	3.29e-06	0	1.67e-06	0	1.31e-06	5.74e-06	1.28e-06	1.27e-06	0	0	2.03e-06	0	0	0	0	0	0	1.19e-06	0	0	0	0	0
k__Fungi;p__Basidiomycota;c__Tremellomycetes;o__Tremellales;f__Cryptococcaceae;g__Kwoniella;s__Kwoniella_shandongensis	1.03e-06	0	0	0	0	0	0	0	0	0	0	0	0	0	0	0	0	0	0	0	0	0	0	0	3.52e-06	0	2.34e-06	2.71e-06	8.54e-07	8.31e-07	3.1e-06	0	0	0	0	0	0	0	0	0	0	0	0	0	0	0	0	0
k__Fungi;p__Basidiomycota;c__Tremellomycetes;o__Tremellales;f__Cuniculitremaceae;g__Kockovaella;s__Kockovaella_imperatae	5.11e-07	0	8.69e-06	0	0	2.03e-06	5.95e-06	0	4e-06	0	0	1.85e-06	3.21e-06	0	2.48e-06	0	0	0	2.1e-06	3.49e-06	2.14e-06	3.49e-06	1.72e-05	0	6.29e-06	2.03e-06	5.26e-06	1.07e-05	1.27e-06	9.71e-06	6.67e-06	1.58e-06	3.61e-06	6.18e-06	1.66e-06	1.32e-05	2.63e-06	1.65e-06	0	0	2.25e-06	0	0	4.21e-06	4.84e-06	2.27e-06	0	0
k__Fungi;p__Basidiomycota;c__Tremellomycetes;o__Tremellales;f__Naemateliaceae;g__Naematelia;s__Naematelia_encephala	6.68e-06	2.98e-06	2.17e-06	1.28e-05	1.3e-05	6.6e-06	2.18e-06	1e-05	4.12e-06	1.36e-05	8.97e-06	0	3.03e-06	3.62e-06	7.68e-06	1.52e-05	8.13e-06	9.23e-06	2.01e-06	1.74e-06	8.15e-06	1.68e-05	1.57e-05	4.74e-06	4.36e-06	2e-05	9.99e-06	1.17e-05	7.48e-06	1.49e-05	8.85e-06	3.45e-06	5.18e-06	4.61e-06	1.8e-06	1.09e-05	8.21e-06	0	9.51e-06	9.3e-06	2.47e-06	9.37e-06	6.44e-06	1.5e-05	1.04e-05	9.91e-06	9.45e-06	4.07e-06
k__Fungi;p__Basidiomycota;c__Tremellomycetes;o__Tremellales;f__Tremellaceae;g__Tremella;s__Tremella_mesenterica	6.03e-07	0	6.73e-06	0	0	2.2e-06	2.15e-06	0	0	2.24e-06	0	0	0	0	5.1e-06	0	0	0	0	0	2.02e-06	0	0	1.57e-06	5.36e-06	0	9.92e-06	1.59e-06	3e-06	6.41e-06	3.63e-06	0	0	4.54e-06	0	0	0	0	0	3.1e-06	9.74e-06	0	0	4.25e-06	0	4.92e-06	9.34e-06	0
k__Fungi;p__Basidiomycota;c__Tremellomycetes;o__Tremellales;f__Trimorphomycetaceae;g__Saitozyma;s__Saitozyma_podzolica	2.86e-06	0	4.22e-06	0	0	0	0	0	0	0	0	0	0	0	0	0	0	0	0	0	0	0	0	0	2.25e-06	0	1.06e-06	4.89e-06	2.73e-06	1.15e-06	0	0	0	0	0	0	0	0	0	0	0	0	0	0	0	0	0	0
k__Fungi;p__Basidiomycota;c__Tremellomycetes;o__Trichosporonales;f__Trichosporonaceae;g__Apiotrichum;s__Apiotrichum_porosum	1.06e-06	0	7.03e-06	0	0	0	0	0	0	2.38e-06	0	0	0	0	0	0	2.83e-06	0	0	0	0	0	2.71e-06	0	8.53e-07	0	0	2.8e-06	7.42e-06	8.6e-07	3.38e-06	0	0	2.41e-06	0	0	0	0	0	0	0	0	0	0	1.08e-05	0	0	0
k__Fungi;p__Basidiomycota;c__Tremellomycetes;o__Trichosporonales;f__Trichosporonaceae;g__Trichosporon;s__Trichosporon_asahii	1.91e-06	0	1.88e-06	1.69e-06	0	1.93e-06	3.9e-06	0	1.8e-06	0	0	4.89e-06	0	1.67e-06	7.14e-06	0	2.34e-06	0	0	0	9.45e-06	0	0	0	1.39e-06	0	1.08e-06	0	0	0	0	3e-06	0	0	0	0	0	1.49e-06	1.47e-06	2.9e-06	2.27e-06	2.73e-06	1.39e-06	0	0	0	0	1.05e-05
k__Fungi;p__Basidiomycota;c__Ustilaginomycetes;o__Ustilaginales;f__Anthracoideaceae;g__Testicularia;s__Testicularia_cyperi	2.17e-06	0	5.56e-06	0	0	7.92e-06	0	0	2.06e-06	0	0	5.09e-06	1.47e-06	1.73e-06	0	1.88e-06	7.3e-06	0	0	0	9.03e-06	1.84e-06	2.21e-06	0	4.22e-06	0	0	1.91e-06	0	3.28e-06	1.72e-05	0	3.36e-06	0	0	0	0	0	0	1.22e-05	2.44e-06	5.72e-06	0	2.06e-06	0	0	0	1.95e-06
k__Fungi;p__Basidiomycota;c__Ustilaginomycetes;o__Ustilaginales;f__Ustilaginaceae;g__Anthracocystis;s__Anthracocystis_flocculosa	0	0	2.75e-06	0	0	0	0	0	0	0	0	0	0	0	0	0	0	0	0	0	0	0	0	0	4.42e-06	0	2.68e-06	0	2.54e-06	2.96e-06	1e-05	0	0	0	0	0	0	0	0	0	0	0	0	0	0	0	0	0
k__Fungi;p__Basidiomycota;c__Ustilaginomycetes;o__Ustilaginales;f__Ustilaginaceae;g__Kalmanozyma;s__Kalmanozyma_brasiliensis	0	0	0	0	0	0	0	0	0	0	0	0	0	0	0	0	0	0	0	0	0	0	0	0	3.55e-06	0	5.28e-06	2.27e-06	6.17e-06	0	1.3e-06	0	0	0	0	0	0	0	0	0	0	0	0	0	0	0	0	0
k__Fungi;p__Basidiomycota;c__Ustilaginomycetes;o__Ustilaginales;f__Ustilaginaceae;g__Melanopsichium;s__Melanopsichium_pennsylvanicum	0	0	0	0	0	0	0	0	0	0	0	0	0	0	0	0	0	0	0	0	0	0	0	0	2.54e-06	0	0	4.03e-06	0	0	1.87e-06	0	0	0	0	0	0	0	0	0	0	0	0	0	0	0	0	0
k__Fungi;p__Basidiomycota;c__Ustilaginomycetes;o__Ustilaginales;f__Ustilaginaceae;g__Moesziomyces;s__Moesziomyces_antarcticus	0	0	0	0	0	0	0	0	0	0	0	0	0	3.47e-06	0	1.83e-06	0	0	0	3.34e-06	0	0	0	0	0	0	0	0	3.51e-06	1.71e-06	0	0	9.93e-06	0	0	0	0	0	0	0	0	0	0	0	0	0	1.82e-06	0
k__Fungi;p__Basidiomycota;c__Ustilaginomycetes;o__Ustilaginales;f__Ustilaginaceae;g__Moesziomyces;s__Moesziomyces_aphidis	3.36e-06	0	3.3e-06	0	0	0	0	0	0	0	0	0	0	0	0	0	0	1.18e-06	0	0	0	0	0	0	3.06e-06	0	3.81e-06	4.9e-06	7.43e-06	1.81e-06	0	0	0	0	0	0	0	0	0	0	0	0	0	0	0	0	0	0
k__Fungi;p__Basidiomycota;c__Ustilaginomycetes;o__Ustilaginales;f__Ustilaginaceae;g__Pseudozyma;s__Pseudozyma_hubeiensis	0	1.54e-06	0	0	0	0	0	0	0	0	2.32e-06	0	0	0	0	0	0	2.39e-06	0	0	0	0	2.67e-06	0	0	0	0	0	0	0	0	3.58e-06	0	0	0	0	0	0	5.14e-06	0	0	0	0	0	0	0	0	0
k__Fungi;p__Basidiomycota;c__Ustilaginomycetes;o__Ustilaginales;f__Ustilaginaceae;g__Sporisorium;s__Sporisorium_graminicola	0	0	0	0	0	0	0	0	0	0	0	0	0	0	0	0	0	0	0	0	0	0	0	0	1.52e-06	0	1.26e-06	9.73e-07	2.77e-06	1.12e-06	1.41e-06	0	0	0	0	0	0	0	0	0	0	0	0	0	0	0	0	0
k__Fungi;p__Basidiomycota;c__Ustilaginomycetes;o__Ustilaginales;f__Ustilaginaceae;g__Sporisorium;s__Sporisorium_reilianum	0	0	0	0	0	0	0	0	0	0	0	0	0	0	0	0	0	0	0	0	0	0	0	0	2.53e-06	0	0	0	4.1e-06	9.97e-07	0	0	0	0	0	0	0	0	0	0	0	0	0	0	0	0	0	0
k__Fungi;p__Basidiomycota;c__Ustilaginomycetes;o__Ustilaginales;f__Ustilaginaceae;g__Sporisorium;s__Sporisorium_scitamineum	2.3e-06	1.56e-06	0	0	0	0	0	2.63e-06	0	2.38e-06	0	0	0	0	0	9.95e-06	0	0	0	0	0	0	0	0	0	0	1.31e-06	0	0	0	0	0	4.9e-06	2.41e-06	5.53e-06	2.6e-06	1.09e-05	5.4e-06	0	0	0	0	0	0	0	0	0	0
k__Fungi;p__Basidiomycota;c__Ustilaginomycetes;o__Ustilaginales;f__Ustilaginaceae;g__Ustilago;s__Ustilago_bromivora	4.29e-06	0	0	0	0	0	0	0	0	0	0	1.72e-06	0	1.76e-06	0	0	0	0	3.91e-06	0	0	0	2.52e-06	0	4.4e-06	2.17e-06	0	0	0	0	0	5.07e-06	0	0	0	0	0	0	1.55e-06	0	2.4e-06	0	0	0	0	0	0	7.91e-06
k__Fungi;p__Basidiomycota;c__Ustilaginomycetes;o__Ustilaginales;f__Ustilaginaceae;g__Ustilago;s__Ustilago_maydis	0	0	0	0	0	0	0	0	0	0	0	0	0	0	0	0	0	0	0	0	0	0	0	0	0	0	0	0	0	0	0	0	1.46e-06	0	1.54e-06	0	6.93e-06	0	0	0	0	0	0	0	0	0	0	0
k__Fungi;p__Basidiomycota;c__Ustilaginomycetes;o__Violaceomycetales;f__Violaceomycetaceae;g__Violaceomyces;s__Violaceomyces_palustris	0	0	0	1.84e-06	0	2.23e-06	8.73e-06	0	0	0	0	0	0	0	0	0	0	2.32e-06	0	0	0	1.87e-06	0	0	7.54e-06	2.24e-06	0	1.93e-06	0	0	0	1.74e-06	1.73e-06	0	0	5.5e-06	0	3.45e-06	0	0	0	0	0	0	0	0	0	0
k__Fungi;p__Basidiomycota;c__Wallemiomycetes;o__Wallemiales;f__Wallemiaceae;g__Wallemia;s__Wallemia_hederae	0	0	1.49e-06	0	0	0	0	0	0	0	0	0	0	0	0	0	0	0	0	0	0	0	0	0	3.6e-06	0	8.59e-07	0	0	2.44e-06	5.53e-06	0	0	0	0	0	0	0	0	0	0	0	0	0	0	0	0	0
k__Fungi;p__Basidiomycota;c__Wallemiomycetes;o__Wallemiales;f__Wallemiaceae;g__Wallemia;s__Wallemia_ichthyophaga	1.24e-05	2.86e-06	9.72e-06	4.08e-06	4.14e-06	1.37e-06	9.23e-06	0	6.82e-06	5.11e-06	4.22e-06	4.24e-09	3.9e-06	4.54e-06	6.54e-07	2.79e-06	2.6e-06	4.45e-06	0	5.43e-06	2.63e-06	7.51e-07	3.21e-06	2.4e-06	3.09e-06	2.76e-06	4.41e-06	3.87e-06	2.19e-06	5.9e-07	3.17e-06	1.15e-05	1.6e-06	3.41e-07	0	1.14e-05	1.02e-05	4.27e-06	9.73e-06	4.96e-07	2.14e-06	2.48e-06	3.08e-06	4.52e-06	3.56e-06	1.91e-06	1.13e-06	2.93e-06
k__Fungi;p__Basidiomycota;c__Wallemiomycetes;o__Wallemiales;f__Wallemiaceae;g__Wallemia;s__Wallemia_mellicola	0	0	0	1.72e-06	0	0	2.04e-06	0	0	0	4.21e-06	0	0	0	0	0	7.59e-06	0	0	0	0	1.74e-06	0	0	4.13e-06	0	1.17e-06	1.69e-06	4.35e-06	0	1.94e-06	0	1.61e-06	0	0	0	0	1.61e-06	0	0	0	2.94e-06	0	2.01e-06	0	2.33e-06	5.31e-06	0
k__Fungi;p__Blastocladiomycota;c__Blastocladiomycetes;o__Blastocladiales;f__Blastocladiaceae;g__Allomyces;s__Allomyces_macrogynus	2.7e-05	6.26e-06	1.95e-05	1.33e-05	1.35e-05	1.17e-05	4.37e-06	9.46e-06	1.29e-05	1.31e-05	2.29e-06	1.08e-05	1.59e-05	1.37e-05	2.86e-05	5.27e-06	1.16e-05	2.09e-05	6.83e-06	3e-06	1.44e-05	1.39e-05	2.66e-05	2.62e-05	4.34e-05	4.47e-06	2.87e-05	6.07e-05	4.17e-05	4.63e-05	7.17e-05	6.38e-06	3.31e-06	7.86e-06	1.14e-05	1.23e-05	1.13e-05	3.5e-06	2.32e-05	1.1e-05	1.08e-05	3.2e-06	5.62e-06	9.09e-06	6.95e-06	6.28e-06	1.41e-05	1.59e-05
k__Fungi;p__Blastocladiomycota;c__Blastocladiomycetes;o__Blastocladiales;f__Catenariaceae;g__Catenaria;s__Catenaria_anguillulae	4.34e-05	5.05e-06	1.17e-05	1.52e-05	1.68e-05	1.26e-05	1.57e-05	8.44e-06	1.68e-05	3.05e-05	1.89e-05	1.33e-05	1.43e-05	3.4e-05	1.84e-05	9.4e-06	1.54e-05	1.76e-05	1.67e-05	1.2e-05	1.1e-05	2.05e-05	5.04e-06	2.18e-05	4.63e-05	1.01e-05	3.91e-05	4.16e-05	3.92e-05	4.82e-05	4.03e-05	5.51e-06	1.92e-05	1.47e-05	1.2e-05	2.54e-05	1.11e-05	1.27e-05	1.96e-05	9.33e-06	1.57e-05	2.58e-05	4.89e-06	1.99e-05	4.22e-05	2.25e-05	1.2e-05	2.73e-05
k__Fungi;p__Chytridiomycota;c__Chytridiomycetes;o__Caulochytriales;f__Caulochytriaceae;g__Caulochytrium;s__Caulochytrium_protostelioides	1.72e-05	2.18e-06	7.45e-06	7.36e-06	6.36e-06	1.72e-05	7.03e-06	2.02e-05	1.68e-06	5.55e-06	1.22e-05	8.11e-06	5.14e-06	9.51e-06	3.77e-06	4.74e-06	7.33e-06	2.36e-05	6.67e-06	7.4e-06	3.36e-06	5.74e-06	4.41e-06	1.87e-05	1.19e-05	2.24e-05	1.27e-05	1.68e-05	1.14e-05	2.02e-05	3.21e-05	1.02e-05	9.63e-06	6.57e-06	2.15e-05	8.55e-06	1.26e-05	7.7e-06	1.61e-05	0	1.22e-05	7.8e-06	1.84e-05	8.51e-06	8.87e-06	1.35e-05	5.37e-06	8.29e-06
k__Fungi;p__Chytridiomycota;c__Chytridiomycetes;o__Chytridiales;f__Chytriomycetaceae;g__Chytriomyces;s__Chytriomyces_confervae	1.85e-05	2.46e-06	2.1e-05	5.76e-06	2.24e-06	2.06e-06	2e-05	1.42e-05	1.51e-05	8.08e-06	4.22e-06	1.82e-06	9.24e-06	5.96e-06	1.18e-05	1.54e-05	1.36e-05	1.32e-05	9.17e-06	1.29e-05	3.68e-06	8.57e-06	1.71e-05	2.95e-06	2.36e-05	1.58e-05	2.28e-05	2.77e-05	3.42e-05	3.05e-05	2.71e-05	6.54e-06	8.87e-06	6.26e-06	2.1e-05	1.92e-05	2e-05	5.85e-06	4.62e-06	1.11e-05	7.67e-06	5.19e-06	3.03e-06	1.53e-05	1.07e-05	4.11e-06	1.49e-05	9.39e-06
k__Fungi;p__Chytridiomycota;c__Chytridiomycetes;o__Chytridiales;f__Chytriomycetaceae;g__Rhizoclosmatium;s__Rhizoclosmatium_globosum	3.29e-05	1.42e-05	3.06e-05	1.89e-05	2.01e-05	1.67e-05	7.21e-06	6.49e-06	1.28e-05	2.18e-05	1.7e-05	1.77e-05	5.29e-06	2.22e-05	2.08e-05	1.96e-06	1.65e-05	1.85e-05	1.78e-06	1.07e-05	2.96e-05	1.73e-05	1.22e-05	6.98e-06	3.01e-05	1.83e-05	5.71e-05	2.9e-05	3.25e-05	3.64e-05	5.09e-05	8.93e-06	1.5e-05	7.94e-06	1.29e-05	1.29e-05	2.64e-05	7.41e-06	1.01e-05	2.12e-05	1.04e-05	8.34e-06	6.07e-06	1.67e-06	9.11e-06	2.87e-05	2.3e-05	6.33e-06
k__Fungi;p__Chytridiomycota;c__Chytridiomycetes;o__Cladochytriales;f__Nowakowskiellaceae;g__Nowakowskiella;s__Nowakowskiella_elegans	0	0	4.28e-06	0	0	4.4e-06	2.15e-06	0	0	0	0	0	0	0	2.55e-06	1.88e-06	0	0	0	0	0	0	0	0	0	4.41e-06	0	0	0	0	0	0	1.7e-06	0	1.8e-06	1.36e-05	0	0	0	3.1e-06	0	0	0	0	0	0	3.74e-06	0
k__Fungi;p__Chytridiomycota;c__Chytridiomycetes;o__Rhizophydiales;f__unclassified;g__Batrachochytrium;s__Batrachochytrium_dendrobatidis	3.75e-05	1.33e-05	1.95e-05	1.5e-05	1.64e-05	7.21e-06	1.69e-05	9.05e-06	1.53e-05	2.92e-05	1.97e-05	5.38e-06	2.97e-06	2.48e-05	1.14e-05	2.17e-05	1.46e-05	9.16e-06	1.11e-05	4.1e-06	1.35e-05	1.37e-05	1.21e-05	8.25e-06	2.6e-05	1.42e-05	2.52e-05	4.3e-05	3.4e-05	3.7e-05	3.72e-05	2.61e-05	1.61e-05	2.27e-05	1.43e-05	2.32e-05	1.22e-05	4.97e-06	8.59e-06	2.06e-05	1.54e-05	6.31e-06	1.09e-05	8.83e-06	3.42e-05	1.98e-05	1.04e-05	9.79e-06
k__Fungi;p__Chytridiomycota;c__Chytridiomycetes;o__Rhizophydiales;f__unclassified;g__Batrachochytrium;s__Batrachochytrium_salamandrivorans	2.09e-05	2.77e-06	1.61e-05	1.12e-05	2.19e-05	3.76e-06	1.2e-05	7.18e-06	1.44e-05	1.01e-05	8.92e-06	1.01e-05	7.5e-06	1.76e-05	1.12e-05	1.01e-05	1.61e-05	4.17e-06	1.16e-05	7.41e-06	2.05e-06	2.45e-05	2.33e-06	6.12e-06	1.13e-05	8.46e-06	1.78e-05	5.58e-06	2.77e-05	3.45e-05	2.44e-05	8.67e-06	1.35e-05	1.25e-05	1.24e-05	1.33e-05	7.99e-06	1.19e-05	1.14e-05	1.15e-05	1.16e-05	0	1.35e-05	1.94e-05	0	2.49e-06	7.08e-06	1.46e-05
k__Fungi;p__Chytridiomycota;c__Chytridiomycetes;o__Spizellomycetales;f__Powellomycetaceae;g__Powellomyces;s__Powellomyces_hirtus	4.34e-05	1.16e-05	4.67e-05	1.6e-05	3.68e-05	4.66e-05	2.45e-05	1.71e-05	4.18e-06	2.71e-05	1.58e-05	1.06e-05	1.02e-05	2.02e-05	2.08e-05	1.1e-05	3.11e-05	1.51e-05	2.86e-05	1.71e-05	1.12e-05	2.03e-05	2.58e-05	1.72e-05	4.1e-05	1.11e-05	8.13e-05	5.98e-05	4.88e-05	5.87e-05	9.71e-05	1.28e-05	2.42e-05	4.16e-06	4.79e-06	7e-06	1.8e-05	1.11e-05	1.07e-05	8.96e-06	1.9e-05	1.52e-05	1.33e-05	3.5e-05	4.96e-06	2.38e-05	7.34e-06	1.41e-05
k__Fungi;p__Chytridiomycota;c__Chytridiomycetes;o__Spizellomycetales;f__Spizellomycetaceae;g__Spizellomyces;s__Spizellomyces_punctatus	7.03e-05	2.88e-06	8.72e-05	2.83e-05	2.72e-05	3.48e-05	1.69e-05	4.17e-05	9.09e-06	1.87e-05	2.41e-05	2.06e-05	1.86e-05	1.74e-05	2.91e-05	2.99e-05	1.4e-05	2.97e-05	2.27e-05	1.37e-05	3.17e-05	3.55e-05	9.59e-06	1.19e-05	0.00012758	2.16e-05	0.00010974	8.85e-05	8.78e-05	0.000127146	0.000149354	1.7e-05	1.4e-05	6.39e-06	6.61e-06	1.39e-05	2.57e-05	1.28e-05	1.33e-05	1.49e-05	1.01e-05	1.28e-05	2.79e-05	1.21e-05	9.06e-06	9.04e-06	9.92e-06	1.93e-05
k__Fungi;p__Chytridiomycota;c__Chytridiomycetes;o__Spizellomycetales;f__Spizellomycetaceae;g__Spizellomyces;s__Spizellomyces_sp._palustris	1.92e-05	6.98e-06	2.04e-05	3.68e-06	8.43e-06	0	0	1.19e-05	3.9e-06	4.4e-06	0	1.35e-05	5.07e-06	5.3e-06	5.17e-06	1.04e-05	1e-05	2.71e-05	5.55e-06	1.52e-05	1.34e-05	1.82e-05	0	6.29e-06	3.49e-05	2.17e-06	3.72e-05	3.69e-05	4.68e-05	4.85e-05	5.52e-05	1.68e-05	6.72e-06	1.4e-05	3.36e-06	7.41e-06	2.21e-05	6.8e-06	1.72e-05	2.47e-06	7.41e-06	1.54e-05	3.8e-06	6.17e-06	2.06e-05	2.49e-06	8.69e-06	1.52e-05
k__Fungi;p__Chytridiomycota;c__Chytridiomycetes;o__Synchytriales;f__Synchytriaceae;g__Synchytrium;s__Synchytrium_endobioticum	2.93e-05	1.38e-05	4.52e-05	2.51e-05	2.64e-05	2.25e-05	3.35e-05	3.33e-05	1.74e-05	2.58e-05	3.48e-05	2.26e-05	1.6e-05	3.58e-05	2.62e-05	3.23e-05	3.1e-05	2.83e-05	1.45e-05	4.78e-05	2.58e-05	2.3e-05	2.28e-05	2.13e-05	3.69e-05	3.82e-05	4.72e-05	3.68e-05	2.8e-05	3.26e-05	5.63e-05	1.76e-05	2.42e-05	3.17e-05	2.01e-05	1.94e-05	4.49e-05	1.74e-05	1.88e-05	3.85e-05	1.6e-05	1.14e-05	3.25e-05	3.3e-05	2.96e-05	2.18e-05	1.41e-05	5.51e-05
k__Fungi;p__Chytridiomycota;c__Chytridiomycetes;o__Synchytriales;f__Synchytriaceae;g__Synchytrium;s__Synchytrium_microbalum	4.76e-05	8.89e-06	6.1e-05	1.17e-05	1.78e-05	1.31e-05	1.99e-05	2.98e-05	2.96e-05	3.04e-05	1.48e-05	2.44e-05	9.41e-06	1.06e-05	1.51e-05	1.11e-05	3.89e-05	1.09e-05	2.28e-05	4.55e-06	1.96e-05	1.51e-05	1.96e-05	1.08e-05	3.42e-05	2.54e-05	3.75e-05	5.62e-05	3.61e-05	3.73e-05	5.76e-05	2.09e-05	8.23e-06	1.07e-05	1.27e-05	1.65e-05	1.67e-05	1.18e-05	1.18e-05	2.67e-05	5.46e-06	1.28e-05	7.54e-06	2.3e-05	2.47e-05	1.27e-05	2.54e-05	7.62e-06
k__Fungi;p__Chytridiomycota;c__Chytridiomycetes;o__unclassified;f__unclassified;g__Blyttiomyces;s__Blyttiomyces_helicus	3.89e-05	8.26e-06	2.66e-05	1.06e-05	1.31e-05	7.14e-06	1.24e-05	2.81e-05	6.68e-06	1.65e-05	1.48e-05	1.74e-05	1.59e-05	1.25e-05	2.17e-05	1.78e-05	2.01e-05	2.09e-05	1.35e-05	1.32e-05	1.32e-05	1.08e-05	2.9e-05	8.48e-06	2.62e-05	1e-05	2.88e-05	4.57e-05	1.55e-05	2.94e-05	3.26e-05	2.19e-05	2.23e-05	1.59e-05	8.96e-06	4.56e-06	9.22e-06	1.65e-06	1.24e-05	2.33e-05	1.34e-05	4.42e-06	1.08e-05	1.8e-05	2.04e-05	1.35e-05	1.37e-05	1.4e-05
k__Fungi;p__Chytridiomycota;c__Monoblepharidomycetes;o__Monoblepharidales;f__Gonapodyaceae;g__Gonapodya;s__Gonapodya_prolifera	4.05e-05	4.66e-06	5.13e-05	2.19e-05	1.19e-05	6.21e-06	2.72e-05	1.65e-05	2.96e-05	1.98e-05	9.91e-06	9.17e-06	1.82e-05	1.3e-05	2.7e-06	2.43e-05	1.25e-05	1.9e-05	2.52e-05	3.07e-05	1.76e-05	9.48e-06	1.43e-05	1.8e-05	4.7e-05	3e-05	6.36e-05	6.24e-05	4.67e-05	4.87e-05	8.1e-05	6.87e-06	6.27e-06	1.01e-05	8.05e-06	1.33e-05	1.46e-05	1.26e-05	1.47e-05	2.69e-05	1e-05	6.42e-06	1.45e-05	1.69e-05	1.3e-05	1.04e-05	2.51e-05	1.42e-05
k__Fungi;p__Chytridiomycota;c__Neocallimastigomycetes;o__Neocallimastigales;f__Neocallimastigaceae;g__Anaeromyces;s__Anaeromyces_robustus	2.27e-05	3.79e-06	2.32e-05	1.05e-05	8.45e-06	8.12e-06	3.51e-06	1.86e-05	7.2e-06	5.79e-06	1.36e-05	3.51e-06	7.83e-06	7.01e-06	9.75e-06	1.89e-05	1.04e-05	1.17e-05	7.82e-06	1.12e-05	0	0	0	0	1.41e-05	7.8e-06	1.95e-05	1.02e-05	1.03e-05	1.78e-05	3.41e-05	1.5e-05	9.08e-06	7.95e-06	3.53e-06	0	2.78e-06	3.34e-06	4.54e-06	5.59e-06	1.89e-05	1.05e-05	1.03e-05	8.38e-06	1.23e-05	6.28e-06	5.43e-06	3.83e-06
k__Fungi;p__Chytridiomycota;c__Neocallimastigomycetes;o__Neocallimastigales;f__Neocallimastigaceae;g__Neocallimastix;s__Neocallimastix_californiae	3.73e-05	2.14e-05	2.17e-05	8.02e-06	8.98e-06	2.87e-05	7.18e-06	2.78e-05	2.31e-05	2.83e-05	1.76e-05	7.56e-06	3.04e-05	1.85e-05	3.57e-05	1.58e-05	1.12e-05	1.28e-05	6.75e-06	1.96e-05	1.96e-05	1.21e-05	4.09e-05	1.38e-05	3.88e-05	3.84e-05	4.23e-05	3.33e-05	3.83e-05	4.67e-05	2.14e-05	1.09e-05	1.13e-05	3.87e-05	1.26e-05	2.85e-05	2.55e-05	1.22e-05	1.47e-05	5.49e-06	3.21e-05	2.93e-05	1.8e-05	1.74e-05	3.05e-05	2.64e-05	2.52e-05	2.38e-05
k__Fungi;p__Chytridiomycota;c__Neocallimastigomycetes;o__Neocallimastigales;f__Neocallimastigaceae;g__Neocallimastix;s__Neocallimastix_cameroonii	2.29e-05	0	2.23e-05	0	0	0	0	0	0	0	0	0	0	0	0	0	0	0	0	0	0	0	0	0	3.37e-05	0	3.05e-05	3.95e-05	2.72e-05	3.92e-05	4.95e-05	0	0	0	0	0	0	0	0	0	0	0	0	0	0	0	0	0
k__Fungi;p__Chytridiomycota;c__Neocallimastigomycetes;o__Neocallimastigales;f__Neocallimastigaceae;g__Neocallimastix;s__Neocallimastix_frontalis	0	0	0	0	0	0	0	0	0	0	0	0	0	0	0	0	0	0	0	0	0	0	0	0	1.07e-06	0	7.08e-06	1.37e-06	0	1.26e-06	1.56e-06	0	0	0	0	0	0	0	0	0	0	0	0	0	0	0	0	0
k__Fungi;p__Chytridiomycota;c__Neocallimastigomycetes;o__Neocallimastigales;f__Neocallimastigaceae;g__Piromyces;s__Piromyces_finnis	2.03e-05	6.39e-06	9.73e-06	8.17e-06	1.2e-05	1.02e-05	1.19e-05	8.91e-06	0	1.1e-05	2.03e-05	7.33e-06	2.85e-06	1.16e-06	4.98e-06	1.51e-06	1.14e-05	1.87e-05	1.02e-05	4.74e-06	1.29e-05	2.01e-05	1.07e-05	8.5e-06	6.16e-06	6.33e-06	1.1e-05	8.17e-06	8.42e-06	2.37e-05	1.6e-05	1.22e-05	1.74e-05	5.28e-06	4.5e-06	1.97e-05	3.39e-06	1.12e-05	1.97e-06	5.33e-06	5.02e-06	2.51e-06	7.48e-06	1.3e-05	2.06e-06	1.39e-05	8.62e-06	3.46e-05
k__Fungi;p__Chytridiomycota;c__Neocallimastigomycetes;o__Neocallimastigales;f__Neocallimastigaceae;g__Piromyces;s__Piromyces_sp._E2	1.35e-05	1.54e-06	1.01e-05	1.12e-05	0	5.91e-06	1.93e-06	6.64e-06	5.37e-06	5.81e-06	9.95e-06	1.34e-05	4.08e-06	9.83e-06	4.58e-06	9.51e-06	4.57e-06	1.94e-06	5.55e-06	2.29e-05	3.52e-06	1.01e-05	0	0	2.08e-05	3.96e-06	2.02e-05	1.58e-05	1.22e-05	2.45e-05	4.02e-05	1.16e-05	1.62e-05	1.27e-06	9.24e-06	5.35e-06	8.79e-06	1.77e-06	5.61e-06	1.21e-05	0	0	2.77e-06	0	4.34e-06	1.54e-05	3.36e-06	7.48e-06
k__Fungi;p__Cryptomycota;c__unclassified;o__unclassified;f__unclassified;g__Paramicrosporidium;s__Paramicrosporidium_saccamoebae	6.96e-06	9.22e-06	4.49e-06	0	3.53e-06	0	3.53e-06	0	1.44e-05	0	6.29e-06	4.06e-06	4.19e-06	4.98e-06	6.47e-06	3.08e-06	3.72e-06	0	3.23e-06	0	7.46e-06	1.74e-06	0	0	1.4e-05	6.15e-06	1.21e-05	9.21e-06	1.86e-05	8.04e-06	9.19e-06	1.58e-06	0	4.19e-06	0	2.5e-06	4.37e-06	2.37e-06	2.54e-06	2.94e-06	0	1.18e-05	1.46e-06	2.01e-06	2.39e-06	2.3e-06	0	0
k__Fungi;p__Cryptomycota;c__unclassified;o__unclassified;f__unclassified;g__Rozella;s__Rozella_allomycis	5.91e-05	1.67e-05	5.3e-05	3.11e-05	5.73e-05	1.85e-05	3.35e-05	4.1e-05	2.94e-05	2.02e-05	1.77e-05	1.55e-05	2.53e-05	4.84e-05	2.97e-05	4.17e-05	3.18e-05	5.64e-05	3.74e-05	2.31e-05	2.63e-05	2.43e-05	2.83e-05	2.59e-05	6.49e-05	1.86e-05	5.7e-05	9.84e-05	6.41e-05	7.54e-05	7.48e-05	4e-05	3.09e-05	1.34e-05	1.67e-05	2.39e-05	2.82e-05	2.4e-05	2.98e-05	3.15e-05	3.99e-05	3.98e-05	1.98e-05	4.44e-05	4.12e-05	5.02e-05	5.7e-05	4.52e-05
k__Fungi;p__Microsporidia;c__unclassified;o__Apansporoblastina;f__Enterocytozoonidae;g__Enterocytozoon;s__Enterocytozoon_hepatopenaei	0	0	1.77e-06	0	0	0	0	0	0	0	0	0	0	0	0	0	0	0	0	0	0	0	0	0	0	0	1.02e-06	0	0	1.45e-06	7.2e-06	0	0	0	0	0	0	0	0	0	0	0	0	0	0	0	0	0
k__Fungi;p__Microsporidia;c__unclassified;o__Apansporoblastina;f__Nosematidae;g__Nosema;s__Nosema_apis	0	4.47e-06	0	0	2.18e-06	0	0	0	0	2.28e-06	0	0	0	0	2.58e-06	0	0	6.97e-06	2.01e-06	1.74e-06	0	0	0	0	0	0	0	0	3.66e-06	0	2.21e-06	0	0	0	0	0	0	0	0	0	0	0	0	0	0	2.49e-06	3.79e-06	0
k__Fungi;p__Microsporidia;c__unclassified;o__Apansporoblastina;f__Nosematidae;g__Nosema;s__Nosema_ceranae	7.99e-06	1.31e-06	1.09e-05	3.68e-06	2.18e-06	0	0	2.52e-06	6.26e-06	0	4.51e-06	0	0	3.16e-06	0	5.47e-06	1.08e-05	2.03e-06	2.01e-06	1.74e-06	4.1e-06	9.11e-06	5.19e-06	1.59e-06	0	2.24e-06	2.5e-06	5.8e-06	1.6e-06	3.34e-06	1.94e-06	0	6.26e-06	2.02e-06	0	2.41e-06	0	0	0	3.15e-06	4.94e-06	6.31e-06	3.22e-06	4.31e-06	0	9.98e-06	0	4.07e-06
k__Fungi;p__Microsporidia;c__unclassified;o__Pansporoblastina;f__Dubosqiidae;g__Hamiltosporidium;s__Hamiltosporidium_tvaerminnensis	0	0	0	1.84e-06	0	2.23e-06	0	0	0	0	0	0	1.53e-06	1.81e-06	0	0	0	0	0	0	0	0	0	4.78e-06	1.51e-06	0	0	0	0	7.12e-06	0	1.74e-06	0	0	3.64e-06	2.75e-06	2.74e-06	0	1.59e-06	0	2.47e-06	0	1.61e-06	6.46e-06	0	0	0	2.03e-06
k__Fungi;p__Microsporidia;c__unclassified;o__unclassified;f__Culicosporidae;g__Edhazardia;s__Edhazardia_aedis	4.61e-06	0	0	0	0	0	2.28e-06	0	0	0	0	0	0	0	0	0	2.83e-06	0	0	0	0	1.95e-06	0	8.33e-06	0	0	1.31e-06	0	0	0	0	0	0	0	0	0	0	0	0	0	0	0	0	0	0	0	1.98e-06	0
k__Fungi;p__Microsporidia;c__unclassified;o__unclassified;f__Ordosporidae;g__Ordospora;s__Ordospora_colligata	0	0	0	0	0	0	0	0	0	0	0	0	0	0	0	0	0	0	0	0	0	0	0	0	0	0	2.43e-06	0	1.78e-06	5.19e-06	2.15e-06	0	0	0	0	0	0	0	0	0	0	0	0	0	0	0	0	0
k__Fungi;p__Microsporidia;c__unclassified;o__unclassified;f__Tubulinosematidae;g__Anncaliia;s__Anncaliia_algerae	1.13e-06	1.54e-06	0	3.79e-06	0	2.3e-06	3.37e-06	1.3e-06	0	0	2.32e-06	0	0	1.86e-06	1.33e-06	1.96e-06	2.79e-06	1.2e-06	1.1e-06	8.97e-07	0	5.77e-06	1.33e-06	1.64e-06	0	3.45e-06	6.44e-07	0	9.42e-07	2.75e-06	0	3.58e-06	8.89e-07	0	2.81e-06	0	1.41e-06	8.87e-07	8.2e-07	1.62e-06	5.09e-06	3.25e-06	1.66e-06	0	4e-06	6.42e-06	5.85e-06	1.05e-06
k__Fungi;p__Microsporidia;c__unclassified;o__unclassified;f__Tubulinosematidae;g__Tubulinosema;s__Tubulinosema_ratisbonensis	0	0	0	5.22e-06	0	6.34e-06	4.13e-06	0	0	0	1.23e-05	1.57e-06	1.45e-06	1.71e-06	4.58e-06	0	0	0	3.56e-06	1.54e-06	1.82e-06	5.08e-06	0	3.02e-06	0	0	0	1.83e-06	1.73e-06	0	0	1.64e-06	1.63e-06	6.26e-06	0	1.04e-05	2.43e-06	0	1.51e-06	5.95e-06	4.38e-06	0	0	3.94e-06	0	2.21e-06	0	0
k__Fungi;p__Microsporidia;c__unclassified;o__unclassified;f__unclassified;g__Mitosporidium;s__Mitosporidium_daphniae	0	4.95e-06	7.75e-06	5.52e-06	7.71e-06	7.81e-06	2.21e-06	0	4.23e-06	5.65e-06	0	5.16e-06	1.56e-06	6.18e-06	1.28e-06	1.85e-06	1.01e-05	1.01e-05	7.99e-06	4.12e-06	2.08e-06	1.87e-05	4.51e-06	7.92e-07	4.48e-06	9.07e-06	9.64e-06	1.26e-05	8.8e-06	1.14e-05	1.07e-05	6.94e-06	4.36e-06	0	1.29e-05	7.91e-06	1.36e-06	1.75e-06	0	6.67e-06	1.17e-05	5.95e-06	3.61e-06	8.34e-06	6.37e-06	3.71e-06	3.3e-06	2.02e-06
k__Fungi;p__Mucoromycota;c__Endogonomycetes;o__Endogonales;f__Endogonaceae;g__Endogone;s__Endogone_sp._FLAS-F59071	3.11e-05	1.19e-05	3.45e-05	7.37e-06	1.76e-05	1.15e-05	1.54e-05	2.06e-05	1.36e-05	1.38e-05	6.97e-06	1.07e-05	1e-05	1.29e-05	1.01e-05	8.6e-06	2.19e-05	2.1e-05	1.02e-05	8.89e-06	4.05e-06	3.85e-06	1.34e-05	9.78e-06	2.66e-05	2.17e-05	2.99e-05	2.42e-05	1.82e-05	3.53e-05	3.98e-05	6.95e-06	1.16e-05	1.33e-05	1.8e-05	5.63e-06	2.05e-05	1.39e-05	6.44e-06	3.3e-05	4.94e-06	6.59e-06	1.27e-05	4.34e-06	1.38e-05	2.74e-05	9.57e-06	1.86e-05
k__Fungi;p__Mucoromycota;c__Endogonomycetes;o__Endogonales;f__Endogonaceae;g__Jimgerdemannia;s__Jimgerdemannia_flammicorona	1.78e-05	1.54e-06	4.45e-05	2.58e-05	6.3e-06	2.79e-05	4.36e-06	4.37e-06	2.04e-05	1.24e-05	1.02e-05	6.43e-06	1.63e-05	8.06e-06	1.96e-05	3.07e-05	1.92e-05	6.03e-06	1.01e-05	1.43e-06	2.13e-05	7.06e-06	3.48e-05	1.03e-05	3.72e-05	1.75e-05	2.93e-05	2.05e-05	3.94e-05	3.64e-05	2.21e-05	8.04e-06	2.94e-05	2.04e-06	3.4e-06	1.85e-05	1.5e-05	8.07e-06	1.31e-06	9.01e-06	9.23e-06	2.08e-05	9.39e-06	1.01e-05	2.48e-06	1.16e-05	6.76e-06	2.03e-06
k__Fungi;p__Mucoromycota;c__Endogonomycetes;o__Endogonales;f__unclassified;g__Bifiguratus;s__Bifiguratus_adelaidae	1.74e-05	3.3e-06	8.86e-06	6.84e-06	7.01e-06	1.65e-06	1.9e-05	1.36e-05	1.25e-05	6.68e-06	5.27e-06	6.17e-06	1.3e-05	1.33e-06	1.98e-05	1.21e-05	1.06e-05	2.1e-05	4.6e-06	8.17e-06	1e-05	2.16e-05	2.52e-06	2.91e-06	1.8e-05	9.03e-06	2e-05	2.63e-05	3.17e-05	3.51e-05	2.85e-05	9.78e-06	1.09e-05	6.27e-06	2.67e-06	2.42e-05	8.07e-06	1.07e-05	7.59e-06	1.16e-05	1.48e-05	0	1.17e-05	1.46e-05	1.27e-05	1.23e-05	0	8.99e-06
k__Fungi;p__Mucoromycota;c__Glomeromycetes;o__Diversisporales;f__Diversisporaceae;g__Diversispora;s__Diversispora_epigaea	5.42e-05	2.32e-05	3.88e-05	2.01e-05	1.82e-05	2.89e-05	2e-05	1.77e-05	9.7e-06	1.61e-05	1.43e-05	1.04e-05	1.64e-05	2.98e-05	4.12e-05	1.53e-05	1.2e-05	3.27e-05	3.5e-05	1.52e-05	8.41e-06	2.33e-05	8.89e-06	2.49e-05	3.57e-05	3.41e-05	2.54e-05	3.75e-05	2.42e-05	3.21e-05	5.1e-05	2.73e-05	2.07e-05	1.55e-05	1.33e-05	2.21e-05	1.47e-05	4.84e-06	1.21e-05	1.45e-05	2.88e-05	2.22e-05	3.11e-06	1.53e-05	1.41e-05	1.3e-05	9.91e-06	1.21e-05
k__Fungi;p__Mucoromycota;c__Glomeromycetes;o__Diversisporales;f__Gigasporaceae;g__Gigaspora;s__Gigaspora_margarita	2.09e-05	4.61e-06	1.46e-05	1.23e-05	7.44e-06	0	5.79e-06	9.14e-06	7.51e-06	8.34e-06	5.77e-06	0	3.64e-06	0	2.45e-06	8.4e-06	2.43e-06	2.08e-06	0	6.4e-06	5.89e-06	1.54e-06	2.45e-06	4.29e-06	3.49e-05	0	5.28e-05	4.05e-05	3.37e-05	3.49e-05	3.86e-05	1.41e-05	3.16e-06	0	3.18e-06	0	2.25e-06	6.35e-06	1.43e-06	6.48e-06	1.13e-05	2.9e-06	2.99e-06	7.94e-06	2.39e-06	7.49e-06	6.96e-06	0
k__Fungi;p__Mucoromycota;c__Glomeromycetes;o__Diversisporales;f__Gigasporaceae;g__Gigaspora;s__Gigaspora_rosea	2.43e-05	7.15e-06	2.76e-05	8.89e-06	1.06e-05	2.17e-06	5.95e-06	2.45e-06	4.18e-06	2.21e-06	9.04e-06	0	1.6e-06	5.2e-06	7.75e-06	9.27e-06	0	0	5.98e-06	1.34e-05	0	1.82e-06	0	1.55e-06	1.22e-05	4.32e-06	1.88e-05	1.94e-05	1.38e-05	2.69e-05	1.36e-05	1.82e-06	1.18e-05	2.41e-06	1.75e-06	2.83e-06	1.01e-05	1.68e-06	7.23e-06	0	2.37e-06	6.09e-06	1.11e-05	2.09e-06	2.52e-06	2.42e-06	1.84e-06	3.96e-06
k__Fungi;p__Mucoromycota;c__Glomeromycetes;o__Glomerales;f__Glomeraceae;g__Glomus;s__Glomus_cerebriforme	2.76e-05	2.39e-06	2.3e-05	2.28e-05	2.99e-05	1.21e-05	8.31e-06	8.27e-06	9.8e-06	8.15e-06	1.79e-05	7.88e-06	5.55e-06	5.03e-06	2.59e-05	2.66e-05	7.15e-06	2.51e-05	7.41e-06	7.53e-06	1.26e-05	8.12e-06	8.93e-06	2.15e-05	3.09e-05	7.52e-06	2.68e-05	1.64e-05	1.81e-05	2.31e-05	1.89e-05	1.06e-05	6.75e-06	1.32e-05	1.68e-06	9.47e-06	1.74e-05	4.85e-06	9.91e-06	2.9e-06	8.73e-06	1.09e-05	1.09e-05	7.32e-06	1.2e-05	6.95e-06	7.48e-06	1.02e-05
k__Fungi;p__Mucoromycota;c__Glomeromycetes;o__Glomerales;f__Glomeraceae;g__Rhizophagus;s__Rhizophagus_clarus	1.89e-05	1.25e-05	1.59e-05	9.54e-06	2.18e-06	1.05e-05	1.35e-05	6.94e-06	0	3.79e-06	2.26e-06	1.33e-05	0	1.1e-05	9.91e-06	3.44e-06	3.64e-05	7.8e-06	9.38e-06	1.45e-05	6.15e-06	8.14e-06	1.17e-05	1.7e-05	2.28e-05	5.96e-06	2.43e-05	2.07e-05	9.66e-06	3.36e-05	1.58e-05	5.95e-06	2.74e-06	2.15e-06	4.39e-06	0	9.12e-06	1.15e-06	3.96e-06	2.9e-06	4.12e-06	7.6e-06	5.26e-06	1.28e-05	7.42e-06	9.36e-06	1.43e-05	1.19e-05
k__Fungi;p__Mucoromycota;c__Glomeromycetes;o__Glomerales;f__Glomeraceae;g__Rhizophagus;s__Rhizophagus_irregularis	0.000108867	6.64e-05	0.000116712	4.84e-05	7.53e-05	6.8e-05	7.16e-05	9.41e-05	8.42e-05	5.9e-05	7.14e-05	6.98e-05	3.91e-05	7.92e-05	8.28e-05	0.000119922	6.49e-05	5.73e-05	5.73e-05	5.65e-05	6.77e-05	6.43e-05	7.59e-05	4.71e-05	8.93e-05	0.000105728	9.87e-05	0.000159862	9.13e-05	0.000134088	0.00015411	5.05e-05	9.79e-05	0.000150184	0.00012154	7.59e-05	6.58e-05	4.47e-05	5.38e-05	7.42e-05	5.88e-05	0.000109263	7.15e-05	8.4e-05	9.37e-05	6.99e-05	5.03e-05	8.31e-05
k__Fungi;p__Mucoromycota;c__Glomeromycetes;o__Glomerales;f__Glomeraceae;g__Rhizophagus;s__Rhizophagus_sp._MUCL_43196	1.89e-05	6e-06	7.79e-06	1.17e-05	2.27e-05	6.16e-06	3.51e-06	1.05e-05	8.77e-06	5.37e-06	9.49e-06	8.51e-06	2.72e-06	5.76e-06	1.04e-05	3.06e-06	1.6e-05	5.54e-06	6.33e-06	4.2e-06	8.55e-06	5.88e-06	1.24e-05	7.79e-06	2.09e-05	7.19e-06	1.55e-05	1.28e-05	1.19e-05	2.98e-05	3.56e-05	1.37e-06	7.53e-06	4.25e-06	2.06e-06	1.55e-05	4.41e-06	3.06e-06	1.28e-06	1.48e-05	7.77e-06	1.31e-05	5.1e-06	6.93e-06	6.25e-06	1.39e-05	4.47e-06	1.13e-05
k__Fungi;p__Mucoromycota;c__Mortierellomycetes;o__Mortierellales;f__Mortierellaceae;g__Lobosporangium;s__Lobosporangium_transversale	1.36e-05	2.82e-06	1.82e-05	5.47e-06	2.21e-06	8.87e-06	0	7.75e-06	2.18e-06	6.91e-06	2.36e-06	3.64e-06	9.53e-06	1.64e-05	5.1e-06	1.52e-05	8.33e-06	1.19e-05	8.09e-06	7.28e-06	1.21e-05	1.95e-06	1.54e-05	9.21e-06	3.24e-05	2.34e-06	4.54e-05	1.59e-05	2.35e-05	3.46e-05	2.76e-05	1.64e-06	8.28e-06	4.67e-06	3.75e-06	5.75e-06	2.86e-06	1.8e-06	7.86e-06	9.76e-06	0	9.51e-06	4.73e-06	4.29e-06	2.71e-06	3.45e-05	5.72e-06	4.25e-06
k__Fungi;p__Mucoromycota;c__Mortierellomycetes;o__Mortierellales;f__Mortierellaceae;g__Mortierella;s__Mortierella_elongata	4.67e-06	0	8.07e-06	8.84e-06	1.33e-05	2.03e-06	2.09e-06	0	4.23e-06	0	4.45e-06	5.01e-06	3.2e-06	3.67e-06	2.35e-06	9.03e-06	7.95e-06	0	1.98e-06	1.77e-06	4.16e-06	5.58e-06	1.95e-05	3.1e-06	1.73e-05	6.68e-06	1.47e-05	1.03e-05	5.65e-06	1.32e-05	2.08e-05	1.35e-05	9.87e-06	2.27e-06	3.51e-06	1.4e-05	0	1.57e-06	1.62e-06	0	9.63e-06	3.11e-06	1.46e-06	4.19e-06	0	9.57e-06	3.45e-06	2.06e-06
k__Fungi;p__Mucoromycota;c__Mortierellomycetes;o__Mortierellales;f__Mortierellaceae;g__Mortierella;s__Mortierella_verticillata	1.16e-05	8.42e-06	1.85e-05	1.98e-05	1.52e-05	9.87e-06	8.9e-06	4.27e-06	4.3e-06	7.84e-06	8.7e-06	1.27e-05	9.43e-06	1.61e-05	9.25e-06	1.83e-06	2.16e-05	1.19e-05	6.62e-06	1.28e-06	1.95e-05	4.91e-06	9.29e-06	6.24e-06	1.43e-05	2.67e-05	1.06e-05	2.38e-05	1.55e-05	1.94e-05	2.5e-05	8.51e-06	1.08e-05	3.65e-06	4.43e-06	7.45e-06	1.47e-05	6.88e-06	1.19e-05	9.3e-06	9.89e-06	2.94e-06	3.8e-06	1.92e-05	6.14e-06	4.08e-06	7.83e-06	1.46e-05
k__Fungi;p__Mucoromycota;c__Mucoromycetes;o__Mucorales;f__Choanephoraceae;g__Choanephora;s__Choanephora_cucurbitarum	4.19e-05	3.03e-06	1.72e-05	8.74e-06	1.75e-05	2.41e-05	5.94e-06	2.07e-05	3.65e-06	1.19e-05	3.57e-05	6.14e-06	1.53e-06	3.55e-06	9.85e-06	8.73e-06	3.24e-05	1.07e-05	3.75e-06	9.97e-06	1.94e-06	1e-05	1.11e-05	1.17e-05	2.57e-05	1.5e-05	2.84e-05	4.22e-05	2.39e-05	8.85e-06	4.11e-05	2.19e-05	5.23e-06	5.72e-06	6.78e-06	8.7e-06	1.31e-05	3.89e-06	1.03e-05	1.48e-05	1.66e-05	5.89e-06	9.99e-06	0	1.31e-05	1.54e-05	7.15e-06	1.42e-05
k__Fungi;p__Mucoromycota;c__Mucoromycetes;o__Mucorales;f__Cunninghamellaceae;g__Absidia;s__Absidia_glauca	1.68e-05	1.01e-05	2.54e-05	1.52e-05	8.97e-06	1.45e-06	4.87e-06	1.44e-05	8.52e-06	9.3e-06	5.65e-06	2.03e-05	4.79e-06	5.06e-06	2.38e-06	3.38e-06	7.76e-06	1.51e-06	5.61e-06	6.93e-06	5.32e-06	9.4e-06	4.61e-06	5.48e-06	2.15e-05	3.77e-06	1.7e-05	9.63e-06	1.46e-05	1.73e-05	2.44e-05	4.37e-06	8.5e-06	6.22e-06	9.17e-06	4.1e-06	2.84e-05	0	4.08e-06	2.04e-06	0	4.8e-06	2e-05	6.12e-06	4.97e-06	1.26e-05	6.8e-06	7.91e-06
k__Fungi;p__Mucoromycota;c__Mucoromycetes;o__Mucorales;f__Cunninghamellaceae;g__Absidia;s__Absidia_repens	5.06e-06	5.46e-06	9.32e-06	1.69e-06	6.16e-06	1.03e-05	8.26e-06	5.27e-06	5.62e-06	1.35e-05	1.33e-05	1.23e-05	4.25e-06	1.2e-05	2.14e-05	3.46e-06	5.07e-06	2.43e-06	0	1.35e-05	5.9e-06	1.64e-06	7.84e-06	1.43e-06	7.63e-06	8.09e-06	2.02e-05	1.5e-05	1.18e-05	1.47e-05	1.96e-05	1.62e-06	1.42e-05	1.79e-05	8.42e-06	9.44e-06	1.42e-05	1.61e-06	1.65e-05	0	4.98e-06	1.18e-05	2.89e-06	3.97e-06	4.65e-06	1.4e-05	3.54e-06	0
k__Fungi;p__Mucoromycota;c__Mucoromycetes;o__Mucorales;f__Cunninghamellaceae;g__Hesseltinella;s__Hesseltinella_vesiculosa	4.07e-06	7.35e-06	4.88e-06	0	8.53e-06	7.72e-06	0	4.9e-06	0	1.29e-05	1.88e-06	0	4.5e-06	1.78e-06	0	1.83e-06	2.67e-06	2.29e-06	3.35e-06	5.11e-06	3.73e-06	3.69e-06	0	4.23e-06	5.14e-06	2.2e-06	3.46e-06	3.63e-06	3.38e-06	1.69e-06	8.84e-06	1.67e-06	0	2.88e-06	4.94e-06	4.43e-06	0	4.74e-06	1.33e-06	1.8e-05	7.17e-06	3.02e-06	6.1e-06	1.02e-05	2.55e-06	1.32e-05	3.45e-06	0
k__Fungi;p__Mucoromycota;c__Mucoromycetes;o__Mucorales;f__Lichtheimiaceae;g__Lichtheimia;s__Lichtheimia_corymbifera	3.02e-05	7.76e-06	4.13e-05	1.63e-06	2.26e-05	1.59e-05	1.48e-05	2.11e-05	1.35e-05	8.73e-06	1.58e-05	2.79e-05	1.39e-05	6.01e-06	8.25e-06	8.93e-06	1.58e-05	1.01e-05	2.19e-05	5.99e-06	1.31e-05	1.16e-05	2.49e-06	1.1e-05	2.83e-05	4.98e-06	2.58e-05	2.51e-05	3.38e-05	2.32e-05	3.87e-05	4.94e-06	4.88e-06	1.22e-05	2.47e-06	1.53e-05	1.5e-05	3.23e-06	1.02e-05	8.39e-06	1.43e-05	6.89e-06	5.36e-06	9.27e-06	1.1e-05	1.05e-05	1.16e-05	6.78e-06
k__Fungi;p__Mucoromycota;c__Mucoromycetes;o__Mucorales;f__Lichtheimiaceae;g__Lichtheimia;s__Lichtheimia_ramosa	1.12e-05	5.19e-06	1.58e-05	1.39e-05	2.58e-05	7.76e-06	7.69e-06	1.55e-05	1.23e-05	3.71e-06	4.19e-06	2.04e-05	6.64e-06	1.29e-05	4.44e-06	1.29e-05	4.71e-06	6.06e-06	1.2e-05	9.59e-06	1.8e-05	1.04e-05	1.08e-05	8.48e-06	3.2e-05	1.13e-05	2.76e-05	2.79e-05	2.38e-05	4.9e-05	3.85e-05	1.17e-05	1.18e-05	8.37e-06	1.46e-05	3.06e-05	1.72e-05	4.57e-06	5.58e-06	0	1.52e-05	5.89e-06	8.17e-06	1.95e-05	8.9e-06	1.5e-05	5.19e-06	1.43e-05
k__Fungi;p__Mucoromycota;c__Mucoromycetes;o__Mucorales;f__Mucoraceae;g__Mucor;s__Mucor_ambiguus	6.21e-06	2.92e-06	3.43e-06	9.03e-06	1.3e-05	8.42e-06	4.43e-06	2.49e-06	3.7e-06	2.02e-06	0	0	4.45e-06	1.83e-06	0	5.55e-06	5.42e-06	6.53e-06	0	8.51e-06	6.16e-06	1.68e-06	1.25e-05	3.03e-06	1.62e-05	0	8.27e-06	9.88e-06	1.38e-05	6.09e-06	1.42e-05	4.68e-06	1.68e-06	0	1.64e-06	8.06e-06	2.7e-06	0	1.41e-06	5.98e-06	4.8e-06	5.59e-06	0	4.06e-06	9.92e-06	0	1.15e-05	0
k__Fungi;p__Mucoromycota;c__Mucoromycetes;o__Mucorales;f__Mucoraceae;g__Mucor;s__Mucor_circinelloides	6.78e-06	0	5.61e-06	1.81e-06	2.21e-06	4.53e-06	6.64e-06	0	0	0	0	1.79e-06	0	9.17e-06	1.3e-05	1.88e-06	0	7.07e-06	1e-05	0	0	1.11e-05	5.19e-06	8.09e-06	6.85e-06	0	3.5e-06	1.11e-05	8.18e-06	1.31e-05	1.45e-05	5.29e-06	5.21e-06	0	3.59e-06	5.43e-06	0	1.7e-06	4.85e-06	3.1e-06	2.51e-06	0	4.76e-06	0	7.88e-06	2.46e-06	1.87e-06	0
k__Fungi;p__Mucoromycota;c__Mucoromycetes;o__Mucorales;f__Mucoraceae;g__Mucor;s__Mucor_lusitanicus	2.6e-05	1.31e-06	1.46e-05	2.89e-06	5.9e-06	3.51e-06	0	4.84e-06	6.45e-06	0	4.51e-06	7.07e-06	1.34e-06	3.78e-06	1.08e-05	3.86e-06	2.13e-06	7.18e-06	1.58e-06	3.64e-06	6.05e-06	3.85e-06	2.04e-06	5.64e-06	1.92e-05	5.95e-06	1.64e-05	2.98e-05	1.15e-05	2.78e-05	1.71e-05	0	6e-06	4.39e-06	5.21e-06	5.58e-06	2.4e-06	4.44e-06	0	5.9e-06	2.54e-06	6.31e-06	1.44e-05	0	9.5e-06	1.96e-06	6.96e-06	5.47e-06
k__Fungi;p__Mucoromycota;c__Mucoromycetes;o__Mucorales;f__Mucoraceae;g__Parasitella;s__Parasitella_parasitica	1.02e-05	1.32e-06	9.16e-07	1.01e-05	0	0	0	1.33e-05	1.92e-06	7.87e-06	6.32e-06	0	1.43e-06	4.93e-06	1.57e-05	1.69e-06	1.18e-05	4.31e-06	1.85e-06	3.25e-06	0	1.74e-06	4.81e-06	1.41e-06	9.4e-06	5.84e-06	1.06e-06	1.01e-05	1e-05	6.73e-06	1.23e-05	1.62e-06	1.53e-06	2.04e-06	6.71e-06	2.53e-06	7.54e-06	0	0	2.72e-06	0	5.52e-06	1.48e-06	0	0	0	1.68e-06	3.68e-06
k__Fungi;p__Mucoromycota;c__Mucoromycetes;o__Mucorales;f__Phycomycetaceae;g__Phycomyces;s__Phycomyces_blakesleeanus	2.24e-05	3.03e-06	3.37e-05	2.97e-05	9.49e-06	2.22e-05	2.79e-05	1.88e-05	2.09e-05	2.48e-05	1.66e-05	1.04e-05	8.76e-06	1.4e-05	2.81e-05	1.54e-05	7.38e-06	1.46e-05	8.03e-06	1.84e-05	9.91e-06	5.49e-06	3.24e-05	2.35e-05	2.9e-05	1.54e-05	1.02e-05	3.07e-05	3.65e-05	3.51e-05	2.88e-05	9.54e-06	2.93e-05	8.98e-06	1.41e-05	1.58e-05	5.87e-05	7.73e-06	1.61e-05	1.79e-05	1.35e-05	4.35e-05	1.39e-05	3.02e-05	1.64e-05	3.7e-05	5.69e-06	1.44e-05
k__Fungi;p__Mucoromycota;c__Mucoromycetes;o__Mucorales;f__Rhizopodaceae;g__Rhizopus;s__Rhizopus_azygosporus	3.36e-06	0	4.75e-06	4.2e-06	1.16e-05	0	3.72e-06	7.67e-06	2.43e-06	3.89e-06	3.85e-06	5.38e-06	0	2.75e-06	0	1.45e-06	1.27e-05	8.36e-06	6.12e-06	4.62e-06	1.56e-06	2.84e-06	0	3.02e-06	1.36e-05	0	9.38e-06	1.19e-05	8.26e-06	8.72e-06	3.41e-06	1.32e-06	1.34e-05	3.5e-06	1.72e-06	0	8.84e-06	5.89e-06	3.01e-06	9.57e-06	6.55e-06	4.8e-06	1.22e-06	1.89e-06	1.97e-06	3.8e-06	3.59e-06	1.89e-05
k__Fungi;p__Mucoromycota;c__Mucoromycetes;o__Mucorales;f__Rhizopodaceae;g__Rhizopus;s__Rhizopus_delemar	4.17e-05	3.43e-06	1.62e-05	9.99e-06	2.05e-05	4.36e-06	1.98e-05	1.01e-05	2e-05	2.95e-06	2.16e-06	1.03e-05	8.96e-06	2.01e-05	1.03e-05	1.9e-06	5.66e-06	6.06e-06	0	2.26e-06	3.04e-05	1.68e-05	0	9.74e-06	2.28e-05	1.18e-05	1.7e-05	2.7e-05	2.1e-05	2.14e-05	4.98e-05	1.48e-05	1.66e-06	1.14e-05	1.06e-05	1.94e-05	1.9e-05	1.65e-06	7.97e-06	2.86e-06	1.21e-05	2.8e-05	3.09e-06	1.65e-05	1.31e-05	6.61e-06	7.18e-06	3.35e-06
k__Fungi;p__Mucoromycota;c__Mucoromycetes;o__Mucorales;f__Rhizopodaceae;g__Rhizopus;s__Rhizopus_microsporus	1.29e-05	9.21e-06	1.64e-05	1e-05	7.84e-06	4.34e-06	0	7.23e-06	5.88e-06	2.36e-05	2.23e-06	6.55e-06	2.59e-05	1.02e-05	6.46e-06	3.49e-06	0	1.94e-06	9.39e-06	7.94e-06	3.73e-06	4.55e-06	7.67e-06	1.57e-06	1.78e-05	6.43e-06	2.56e-05	3.39e-05	2.82e-05	3.53e-05	4.06e-05	1.16e-05	4.46e-06	2.17e-05	1.37e-06	2.57e-06	5.32e-06	4.7e-06	8.63e-06	0	1.19e-05	0	4.23e-06	8.05e-06	7.2e-06	4.7e-06	6.56e-06	1.42e-05
k__Fungi;p__Mucoromycota;c__Mucoromycetes;o__Mucorales;f__Rhizopodaceae;g__Rhizopus;s__Rhizopus_stolonifer	5.2e-05	6.5e-06	4.59e-05	2.11e-05	2.23e-05	1.8e-05	1e-05	1.01e-05	6.85e-06	9.67e-06	4.91e-06	1.01e-05	1.77e-05	1.18e-05	1.02e-05	6.22e-06	8.89e-06	1.2e-05	6.59e-06	1.23e-05	9.63e-06	1.5e-05	1.84e-05	1.24e-05	5.99e-05	1.11e-05	5.31e-05	4.9e-05	5.68e-05	4.99e-05	6.76e-05	1.51e-05	1.03e-05	1.58e-05	5.61e-06	9.03e-06	1.51e-05	1.89e-06	1.87e-05	9.39e-06	5.04e-06	1.41e-05	8.77e-06	9.81e-06	5.1e-06	1.35e-05	4.59e-06	1.12e-05
k__Fungi;p__Mucoromycota;c__Mucoromycetes;o__Mucorales;f__Syncephalastraceae;g__Syncephalastrum;s__Syncephalastrum_racemosum	3.74e-05	1.52e-05	2.16e-05	2.29e-05	2.64e-05	3.14e-05	1.99e-05	4.58e-05	1.97e-05	1.78e-05	1.89e-05	6.58e-06	3.25e-05	2.61e-05	6.02e-05	3.1e-05	2.21e-05	1.54e-05	3.07e-05	3.94e-05	1.88e-05	3.01e-05	2.79e-05	7.89e-06	4.65e-05	2.03e-05	3.1e-05	4.15e-05	3.72e-05	3.72e-05	4.03e-05	2.71e-05	1.41e-05	2.08e-05	1.8e-05	7.51e-06	2.87e-05	1.4e-05	1.23e-05	2.84e-05	1.24e-05	3.14e-05	1.95e-05	2.75e-05	3.28e-05	1.87e-05	2e-05	1.21e-05
k__Fungi;p__Zoopagomycota;c__Basidiobolomycetes;o__Basidiobolales;f__Basidiobolaceae;g__Basidiobolus;s__Basidiobolus_meristosporus	7.98e-05	7.13e-06	0.000115374	1.22e-05	3.58e-05	3.25e-05	2.79e-05	2.33e-05	1.8e-05	1.85e-05	2.01e-05	2.24e-05	1.38e-05	1.34e-05	1.45e-05	2.71e-05	1.96e-05	4.81e-05	2.36e-05	1.14e-05	2.28e-05	1.61e-05	2.52e-05	1.55e-05	9.64e-05	3.11e-05	0.000125626	0.000130949	9.64e-05	0.000164062	0.000163994	3.61e-05	1.44e-05	2.22e-05	1.21e-05	4.72e-05	1.85e-05	1.07e-05	2.38e-05	2.01e-05	2.24e-05	3.78e-05	1.29e-06	3.11e-05	2.16e-05	2.29e-05	1.83e-05	2.12e-05
k__Fungi;p__Zoopagomycota;c__Dimargaritomycetes;o__Dimargaritales;f__Dimargaritaceae;g__Dimargaris;s__Dimargaris_cristalligena	4.16e-06	2.87e-06	2.24e-06	5.68e-06	6.44e-06	0	0	2.26e-06	0	0	2.32e-06	1.82e-06	1.38e-06	0	2.32e-06	5.63e-06	2.79e-06	0	0	3.13e-06	3.68e-06	9.37e-06	0	3.28e-06	8.64e-06	4.6e-06	5.45e-06	8.78e-06	2.69e-06	4.15e-06	5.81e-06	9.36e-06	3.1e-06	0	1.88e-06	0	0	1.55e-06	4.71e-06	0	0	0	4.55e-06	4.43e-06	0	7.37e-06	0	7.3e-06
k__Fungi;p__Zoopagomycota;c__Entomophthoromycetes;o__Entomophthorales;f__Ancylistaceae;g__Conidiobolus;s__Conidiobolus_coronatus	7.08e-06	0	1.22e-05	7.05e-06	0	2.14e-06	0	2.42e-06	2e-06	0	0	0	0	0	0	0	2.6e-06	0	0	0	1.97e-06	1.79e-06	0	0	2.6e-05	2.14e-06	1.13e-05	1.81e-05	2.8e-05	2.84e-05	1.37e-05	0	2.3e-06	0	2.96e-06	5.5e-06	0	0	0	0	0	0	0	0	2.48e-06	2.39e-06	0	0
k__Fungi;p__Zoopagomycota;c__Harpellomycetes;o__Harpellales;f__Harpellaceae;g__Furculomyces;s__Furculomyces_boomerangus	0	0	0	0	0	0	0	0	0	0	0	0	0	0	0	1.88e-06	0	0	0	0	2.02e-06	1.84e-06	0	1.57e-06	0	0	0	0	0	0	0	0	0	0	0	0	0	0	0	0	0	3.11e-06	0	2.12e-06	0	0	9.34e-06	0
k__Fungi;p__Zoopagomycota;c__Harpellomycetes;o__Harpellales;f__Legeriomycetaceae;g__Smittium;s__Smittium_angustum	4.55e-06	1.03e-05	1.22e-06	0	0	8.81e-06	1.29e-05	0	0	2.24e-06	4.45e-06	0	0	0	0	1.88e-06	2.67e-06	0	3.97e-06	0	4.04e-06	5.53e-06	0	1.57e-06	4.19e-06	0	5.41e-06	2.12e-06	1.81e-06	3.87e-06	5.8e-06	6.86e-06	0	4.54e-06	0	0	2.7e-06	1.7e-06	0	0	0	0	1.59e-06	4.25e-06	0	2.46e-06	7.48e-06	4.01e-06
k__Fungi;p__Zoopagomycota;c__Harpellomycetes;o__Harpellales;f__Legeriomycetaceae;g__Smittium;s__Smittium_culicis	4.25e-05	1.42e-05	3.65e-05	4.3e-05	4.33e-05	3.49e-05	3.13e-05	5.2e-05	3.24e-05	2.59e-05	3.4e-05	5.07e-05	2.3e-05	3.75e-05	2.85e-05	3.16e-05	2.35e-05	2.54e-05	3.01e-05	4.52e-05	3.13e-05	1.91e-05	4.14e-05	1.39e-05	2.59e-05	3.85e-05	2.56e-05	4.54e-05	4.93e-05	4.03e-05	3.76e-05	3.37e-05	3.15e-05	2.57e-05	2.54e-05	2.79e-05	2.31e-05	1.04e-05	1.76e-05	6.18e-05	2.87e-05	2.33e-05	3.43e-05	3.92e-05	3.89e-05	3.38e-05	2.08e-05	4.03e-05
k__Fungi;p__Zoopagomycota;c__Harpellomycetes;o__Harpellales;f__Legeriomycetaceae;g__Smittium;s__Smittium_megazygosporum	1.24e-06	1.45e-06	0	0	2.12e-06	0	2.12e-06	0	0	0	0	0	1.49e-06	5.27e-06	0	0	1.05e-05	0	0	0	0	0	0	0	8.51e-07	0	8.3e-06	1.09e-06	0	2.74e-06	3.75e-06	0	0	0	0	2.68e-06	0	3.35e-06	0	0	0	0	0	0	0	4.85e-06	0	0
k__Fungi;p__Zoopagomycota;c__Harpellomycetes;o__Harpellales;f__Legeriomycetaceae;g__Smittium;s__Smittium_mucronatum	8.12e-06	0	4e-06	3.68e-06	6.12e-06	2.01e-05	1.04e-05	0	0	6.31e-06	4e-06	4.94e-06	4.22e-06	1.6e-06	2.35e-06	5.34e-06	1.29e-05	0	5.49e-06	4.81e-06	1e-05	0	9.61e-06	4.41e-06	8.41e-06	0	1.03e-05	5.27e-06	4.95e-06	1.62e-06	1.22e-05	1.6e-06	6.18e-06	4.22e-06	9.16e-06	7.51e-06	2.43e-06	3.12e-06	1.47e-06	1.13e-05	0	0	0	1.06e-05	5.18e-06	2.49e-06	1.72e-06	9.06e-06
k__Fungi;p__Zoopagomycota;c__Harpellomycetes;o__Harpellales;f__Legeriomycetaceae;g__Smittium;s__Smittium_simulii	1.15e-05	4.54e-06	5.91e-06	1.87e-06	8.84e-06	4.53e-06	0	1.02e-05	4.23e-06	6.93e-06	6.87e-06	3.59e-06	0	1.83e-06	5.24e-06	3.86e-06	1.1e-05	2.36e-06	0	0	2.08e-06	3.79e-06	0	3.24e-06	8.32e-06	2.27e-06	7.12e-07	1.1e-06	1.6e-05	7.89e-06	9.52e-06	7.06e-06	3.5e-06	0	0	5.58e-06	2.78e-06	1.75e-06	1.62e-06	3.19e-06	1e-05	0	1.63e-06	2.18e-06	1.05e-05	0	1.92e-06	2.06e-06
k__Fungi;p__Zoopagomycota;c__Harpellomycetes;o__Harpellales;f__Legeriomycetaceae;g__Zancudomyces;s__Zancudomyces_culisetae	0	0	0	0	0	2.27e-06	2.18e-06	4.47e-06	0	0	0	3.54e-06	6.23e-06	5.25e-06	2.58e-06	0	0	0	2.04e-06	3.09e-06	6.15e-06	6.84e-06	2.63e-06	0	1.34e-05	2.24e-06	7.48e-06	2.88e-06	1.05e-05	5.42e-06	3.86e-06	5.22e-06	0	0	0	8.25e-06	8.21e-06	0	3.19e-06	0	0	6.4e-06	1.13e-05	2.15e-06	2.59e-06	0	1.9e-06	0
k__Fungi;p__Zoopagomycota;c__Kickxellomycetes;o__Kickxellales;f__Kickxellaceae;g__Coemansia;s__Coemansia_reversa	1.82e-05	0	8.49e-06	1.57e-06	1.2e-05	1.55e-05	1.03e-05	7.5e-06	3.57e-06	1.98e-05	1.45e-05	6.72e-06	9.95e-07	1.37e-05	6.7e-06	9.26e-06	1.76e-06	9.23e-06	6.36e-06	1.62e-05	4.74e-06	9.96e-06	0	8.78e-06	1.38e-05	1.52e-05	1.43e-05	4.5e-06	1.31e-05	2.07e-05	1.83e-05	8.52e-06	1.18e-05	4.05e-06	5.91e-06	1.75e-05	1.06e-05	6.22e-06	1.78e-05	8.16e-06	1.6e-06	2.32e-05	1.89e-05	2.33e-05	1.68e-06	1.39e-05	6.53e-06	1.46e-05
k__Fungi;p__Zoopagomycota;c__Kickxellomycetes;o__Kickxellales;f__Kickxellaceae;g__Linderina;s__Linderina_pennispora	2.94e-05	1.51e-06	1.11e-05	7.04e-06	6.13e-06	1.56e-05	4.02e-06	0	1.17e-05	4.28e-06	4.06e-06	5.23e-06	5.57e-06	8.9e-06	2.66e-06	3.1e-06	2.21e-06	1.3e-05	3.89e-06	0	8.45e-06	1.87e-06	7.67e-06	1.62e-06	3.84e-05	2.24e-06	3.1e-05	2.26e-05	2.11e-05	4.53e-05	2.97e-05	4.99e-06	0	6.12e-06	6.81e-06	2.53e-06	1.83e-05	1.4e-06	4.29e-06	3.15e-06	2.47e-06	0	6.22e-06	2.18e-06	4.49e-06	2.53e-06	3.64e-06	1.87e-06
k__Fungi;p__Zoopagomycota;c__Zoopagomycetes;o__Zoopagales;f__Piptocephalidaceae;g__Piptocephalis;s__Piptocephalis_cylindrospora	1.34e-05	0	1.84e-05	3.48e-06	2.06e-06	0	0	0	0	0	0	0	1.45e-06	0	0	0	5.13e-06	0	0	0	0	0	0	0	1.39e-05	2.11e-06	1.46e-05	8.91e-06	9.68e-06	1.98e-05	1.35e-05	0	2.49e-06	1.66e-06	5.26e-06	0	1.98e-06	3.26e-06	0	0	0	0	0	0	0	0	0	3.85e-06
k__Fungi;p__Zoopagomycota;c__Zoopagomycetes;o__Zoopagales;f__Piptocephalidaceae;g__Syncephalis;s__Syncephalis_pseudoplumigaleata	4.25e-05	2.03e-06	1.94e-05	3.45e-06	8.2e-06	8.4e-06	0	4.9e-06	1.42e-06	7.74e-06	4.6e-06	8.36e-06	5.82e-06	2.46e-06	1.7e-05	8.56e-06	4.1e-06	1.29e-05	4.2e-06	2.37e-06	0	0	5.69e-06	1.57e-06	5.15e-05	1.52e-06	3.34e-05	2.34e-05	4.08e-05	2.77e-05	4.06e-05	6.71e-06	1.8e-06	0	6.56e-06	0	0	2.61e-06	4.08e-06	5.42e-06	1.68e-06	8.99e-06	5.43e-06	1.45e-05	8.12e-06	0	1.29e-06	2.77e-06
k__Fungi;p__Zoopagomycota;c__Zoopagomycetes;o__Zoopagales;f__Sigmoideomycetaceae;g__Thamnocephalis;s__Thamnocephalis_sphaerospora	1.77e-05	1.51e-05	1.62e-05	2.69e-05	3.95e-05	1.98e-05	1.45e-05	2.21e-06	1.12e-05	1.35e-05	1.67e-05	1.35e-05	1e-05	8.34e-06	1.96e-05	1.53e-05	6.06e-06	4.13e-06	4e-06	1.95e-05	1.9e-05	3.59e-06	4.11e-05	1.16e-05	2.9e-05	8.57e-06	2.68e-05	3.48e-05	2.66e-05	1.32e-05	2.4e-05	3.79e-06	1.39e-05	2.12e-05	1.92e-05	7.34e-06	1.56e-05	9.86e-06	6.25e-06	1.77e-05	1.23e-05	2.73e-05	1.49e-05	3.98e-06	9.76e-06	2.64e-05	9.14e-06	5.42e-06
k__Fungi;p__unclassified;c__unclassified;o__unclassified;f__unclassified;g__unclassified;s__fungal_sp._BT2	1.09e-06	0	5.39e-06	0	0	0	0	0	0	0	0	0	0	0	0	0	0	0	0	0	0	0	0	0	7.48e-06	0	3.11e-06	4.8e-06	2.73e-06	2.65e-06	2.2e-06	0	0	0	0	0	0	0	0	0	0	0	0	0	0	0	0	0

## Sheet: bacteria
species	CSD01	CSD02	CSD03	CSD06	CSD07	CSD08	CSD09	CSD10	CSD11	CSD12	CSD13	CSD14	CSD15	CSD16	CSD17	CSD18	CSD22	CSD23	CSD24	CSD25	CSD27	CSD28	CSD29	CSD30	CON03	CON04	CON05	CON06	CON07	CON09	CON10	CON11	CON13	CON14	CON15	CON16	CON17	CON18	CON19	CON20	CON21	CON22	CON23	CON25	CON26	CON27	CON29	CON30
k__Bacteria;p__Acidobacteria;c__Acidobacteriia;o__Acidobacteriales;f__Acidobacteriaceae;g__Occallatibacter;s__Occallatibacter_savannae	6	0	11	0	0	0	0	0	0	0	0	0	0	0	0	0	0	0	0	0	0	0	0	0	32	0	19	17	17	14	14	0	0	0	0	0	0	0	0	0	0	0	0	0	0	0	0	0
k__Bacteria;p__Acidobacteria;c__Acidobacteriia;o__Bryobacterales;f__unclassified;g__unclassified;s__Bryobacterales_bacterium	7	0	12.68	0	0	0	0	0	2	0	1	0	0	0	0	0	0	0	0	0	0	0	0	1	20	0	25.253	9	9.214	8	20	0	0	0	0	0	2	0	0	0	0	0	0	0	0	1	0	0
k__Bacteria;p__Acidobacteria;c__Blastocatellia;o__Blastocatellales;f__Pyrinomonadaceae;g__unclassified;s__Pyrinomonadaceae_bacterium	1	0	1	0	0	0	0	0	0	0	0	0	0	0	0	0	0	0	0	0	0	0	0	0	4	0	14	2	5	1	5	0	0	0	0	0	0	0	0	0	0	0	0	0	0	0	0	0
k__Bacteria;p__Acidobacteria;c__Blastocatellia;o__unclassified;f__unclassified;g__unclassified;s__Blastocatellia_bacterium	0	0	3	0	0	1	1	2	0	2	2.394	1	1	2	0	1	0	3	0	1	2	4	1	3	0	0	7	2	3	2	8	2	0	0	0	0	1	1	1	1	4	0	2	0	4	2	6	0
k__Bacteria;p__Acidobacteria;c__Holophagae;o__Holophagales;f__unclassified;g__unclassified;s__Holophagales_bacterium	2.563	0	7.692	0	0	0	0	0	0	0	0	0	0	0	0	0	0	0	0	0	0	1	0	0	9.389	0	12.587	13.795	26.591	12	19.395	0	0	0	0	0	0	0	0	0	0	0	0	0	0	0	0	0
k__Bacteria;p__Acidobacteria;c__Thermoanaerobaculia;o__unclassified;f__unclassified;g__unclassified;s__Thermoanaerobaculia_bacterium	2.648	4	0	1.974	0	2	4	1.951	1.479	1	0	0	3.54	1.632	3	0	1	1.484	0	7.46	0	0	0	0	0	0	1.48	4	0	0	0	2.651	1.932	0	2	0	1	2.139	0	0	1	0	0	0	0	0	0	0
k__Bacteria;p__Acidobacteria;c__Vicinamibacteria;o__unclassified;f__Vicinamibacteraceae;g__Luteitalea;s__Luteitalea_sp.	0	0	0	0	0	0	0	0	0	0	0	0	0	0	3	0	0	0	0	0	0	0	0	0	0	0	0	0	0	0	0	0	0	0	0	0	0	0	0	0	0	0	0	0	0	0	0	0
k__Bacteria;p__Acidobacteria;c__unclassified;o__unclassified;f__unclassified;g__unclassified;s__Acidobacteria_bacterium	6.744	2	7.455	5	4	0	5	3	2	1	5	4	4	6	3	2	0	1	4	2	1	0	1	2	20.265	4	33.936	19.039	18.001	25.243	25.422	4	3	1	5	0	1	1	1	1	0	3	1	1	0	0	0	1.268
k__Bacteria;p__Acidobacteria;c__unclassified;o__unclassified;f__unclassified;g__unclassified;s__Acidobacteria_bacterium_13_1_40CM_2_60_7	0	3	0	0	0	0	0	0	0	0	0	0	0	0	0	0	0	0	0	0	0	0	0	0	0	0	0	0	0	0	0	0	0	0	0	0	0	0	0	0	0	0	0	0	0	0	0	0
k__Bacteria;p__Acidobacteria;c__unclassified;o__unclassified;f__unclassified;g__unclassified;s__Acidobacteria_bacterium_RBG_13_68_16	0	0	0	0	0	0	0	0	0	0	0	0	0	0	0	0	0	0	0	0	0	0	0	0	1	0	4	1	5	0	0	0	0	0	0	0	0	0	0	0	0	0	0	0	0	0	0	0
k__Bacteria;p__Actinobacteria;c__Acidimicrobiia;o__Acidimicrobiales;f__Acidimicrobiaceae;g__unclassified;s__Acidimicrobiaceae_bacterium	2	0	0	0	0	0	0	0	0	0	0	0	0	0	0	0	0	0	0	0	0	0	0	0	0	0	2	1	0	1	3	0	0	0	0	0	0	0	0	0	0	0	0	0	0	0	0	0
k__Bacteria;p__Actinobacteria;c__Acidimicrobiia;o__Acidimicrobiales;f__unclassified;g__unclassified;s__Acidimicrobiales_bacterium	2	0	3	0	0	0	0	0	0	0	0	0	0	0	0	0	0	4	0	0	0	0	0	0	1.513	0	5	0	1	4	0	0	0	0	0	0	0	0	0	0	0	0	0	0	0	0	0	0
k__Bacteria;p__Actinobacteria;c__Acidimicrobiia;o__unclassified;f__unclassified;g__unclassified;s__Acidimicrobiia_bacterium	0	0	0	0	0	0	0	0	0	0	0	0	0	0	0	0	0	0	0	0	0	0	0	0	0	0	0	3	0	1	0	0	0	0	0	0	0	0	0	0	0	0	0	0	0	0	0	0
k__Bacteria;p__Actinobacteria;c__Actinobacteria;o__Actinomycetales;f__Actinomycetaceae;g__Fannyhessea;s__Fannyhessea_vaginae	0	2	5	3	1	0	0	0	1	1	0	6.046	1	0	4	1	1	5	2	0	12	0	2	131.278	6	3	0	3	3	1	1	5	5	1	2	2	0	1	1	0	1	0	0	3	2	1	0	2
k__Bacteria;p__Actinobacteria;c__Actinobacteria;o__Actinomycetales;f__Actinomycetaceae;g__Mobiluncus;s__Mobiluncus_mulieris	3	0	49	0	0	0	0	0	0	0	0	0	0	0	41	1	0	1	0	0	281.71	0	0	0	647.401	0	18	0	1	0	1	0	0	0	0	0	0	0	0	0	0	0	0	0	0	0	3	0
k__Bacteria;p__Actinobacteria;c__Actinobacteria;o__Bifidobacteriales;f__Bifidobacteriaceae;g__Bifidobacterium;s__Bifidobacterium_adolescentis	0	0	0	0	0	0	0	0	0	0	0	0	0	0	0	0	0	0	0	0	0	0	0	0	0	0	0	0	0	0	0	0	0	0	0	0	0	0	0	0	0	0	0	0	17	0	0	0
k__Bacteria;p__Actinobacteria;c__Actinobacteria;o__Bifidobacteriales;f__Bifidobacteriaceae;g__Bifidobacterium;s__Bifidobacterium_avesanii	0	0	1	0	0	0	0	0	0	0	0	0	0	0	4	0	0	0	0	0	0	0	0	0	0	0	0	0	0	0	0	0	0	0	0	0	0	0	0	0	0	0	0	0	0	0	0	0
k__Bacteria;p__Actinobacteria;c__Actinobacteria;o__Bifidobacteriales;f__Bifidobacteriaceae;g__Bifidobacterium;s__Bifidobacterium_bifidum	0	0	0	0	0	0	0	0	0	0	0	0	0	0	0	0	0	0	0	0	0	0	0	1	0	0	0	0	0	0	0	0	0	0	0	0	0	0	0	0	0	0	0	0	113.494	0	0	0
k__Bacteria;p__Actinobacteria;c__Actinobacteria;o__Bifidobacteriales;f__Bifidobacteriaceae;g__Bifidobacterium;s__Bifidobacterium_breve	3	0	2	0	1	0	0	4	0	2	0	4	5	1	1	0	0	0	0	4	0	0	0	0	4	0	1.175	4	2	4	3	0	1	0	0	1	0	1	0	0	1	0	0	1	4344.98	2	1	0
k__Bacteria;p__Actinobacteria;c__Actinobacteria;o__Bifidobacteriales;f__Bifidobacteriaceae;g__Bifidobacterium;s__Bifidobacterium_catenulatum	0	0	1	0	1	0	0	0	0	0	0	0	4	0	0	0	0	0	0	0	8	0	0	81.161	0	0	0	0	0	0	0	0	0	0	0	0	0	0	0	0	0	0	0	0	0	0	0	0
k__Bacteria;p__Actinobacteria;c__Actinobacteria;o__Bifidobacteriales;f__Bifidobacteriaceae;g__Bifidobacterium;s__Bifidobacterium_felsineum	0	0	0	0	0	0	0	0	0	0	0	0	0	0	0	0	0	0	0	0	0	0	0	0	0	0	0	0	0	0	0	0	0	0	0	0	0	0	0	0	0	0	0	0	8.64	0	0	0
k__Bacteria;p__Actinobacteria;c__Actinobacteria;o__Bifidobacteriales;f__Bifidobacteriaceae;g__Bifidobacterium;s__Bifidobacterium_gallinarum	0	0	0	0	0	0	0	0	0	0	0	0	0	0	0	0	0	0	0	0	0	0	0	0	0	0	0	0	0	0	0	0	0	0	0	0	0	0	0	0	0	0	0	0	2.427	0	0	0
k__Bacteria;p__Actinobacteria;c__Actinobacteria;o__Bifidobacteriales;f__Bifidobacteriaceae;g__Bifidobacterium;s__Bifidobacterium_imperatoris	0	0	0	0	0	0	0	0	0	0	0	0	0	0	0	0	0	0	0	0	0	0	0	0	0	0	0	0	0	0	0	0	0	0	0	0	0	0	0	0	0	0	0	0	6	0	0	0
k__Bacteria;p__Actinobacteria;c__Actinobacteria;o__Bifidobacteriales;f__Bifidobacteriaceae;g__Bifidobacterium;s__Bifidobacterium_lemurum	0	0	5	0	0	0	0	0	0	0	0	4	3	0	1	0	0	0	0	0	44	0	0	162.335	8	0	4	0	1	0	0	3	0	0	0	1	0	0	0	0	0	0	0	0	16	0	0	0
k__Bacteria;p__Actinobacteria;c__Actinobacteria;o__Bifidobacteriales;f__Bifidobacteriaceae;g__Bifidobacterium;s__Bifidobacterium_longum	2	0	1	0	0	0	0	0	0	0	0	0	0	0	0	0	0	0	0	0	36	0	0	145	14	0	1	0	0	0	0	0	0	0	0	0	0	0	0	0	0	0	0	0	677.392	0	0	0
k__Bacteria;p__Actinobacteria;c__Actinobacteria;o__Bifidobacteriales;f__Bifidobacteriaceae;g__Bifidobacterium;s__Bifidobacterium_margollesii	0	0	0	0	0	0	0	0	0	0	0	0	0	0	0	0	0	0	0	0	0	0	0	0	0	0	0	0	0	0	0	0	0	0	0	0	0	0	0	0	0	0	0	0	3	0	0	0
k__Bacteria;p__Actinobacteria;c__Actinobacteria;o__Bifidobacteriales;f__Bifidobacteriaceae;g__Bifidobacterium;s__Bifidobacterium_pseudocatenulatum	7.461	5.024	9.021	12.129	10.551	6.092	9.556	1.006	11.788	5.408	6	12.336	10.361	10.411	8.379	11.312	11.604	6.318	11.16	9.199	39.943	11.397	15.483	8.39	6.887	7.049	18.149	11.212	5.22	14.508	10.251	11.017	10.067	1.034	17.271	3	7.945	7.447	3.107	5.019	9.241	4.441	7.52	14.027	15.314	6.404	6.471	15.083
k__Bacteria;p__Actinobacteria;c__Actinobacteria;o__Bifidobacteriales;f__Bifidobacteriaceae;g__Bifidobacterium;s__Bifidobacterium_pseudolongum	0	0	0	0	0	0	0	0	0	0	0	0	0	0	0	0	0	0	0	0	0	0	0	0	0	0	0	0	0	0	0	0	0	0	0	0	0	0	0	0	0	0	0	0	9	0	0	0
k__Bacteria;p__Actinobacteria;c__Actinobacteria;o__Bifidobacteriales;f__Bifidobacteriaceae;g__Bifidobacterium;s__Bifidobacterium_reuteri	0	0	0	0	0	0	0	0	0	0	0	0	0	0	0	0	0	0	0	0	0	0	0	0	0	0	0	0	0	0	0	0	0	0	0	0	0	0	0	0	0	0	0	0	4	0	0	0
k__Bacteria;p__Actinobacteria;c__Actinobacteria;o__Bifidobacteriales;f__Bifidobacteriaceae;g__Bifidobacterium;s__Bifidobacterium_sp.	0	0	0	0	2	0	0	0	0	0	0	12	0	0	0	0	0	0	0	0	27	0	0	123	1	0	0	0	0	0	0	1	0	0	0	0	0	0	0	0	0	0	0	0	1	0	0	0
k__Bacteria;p__Actinobacteria;c__Actinobacteria;o__Bifidobacteriales;f__Bifidobacteriaceae;g__Bifidobacterium;s__Bifidobacterium_sp._DSM_109959	0	0	0	0	0	0	0	0	0	0	0	0	0	0	0	0	0	0	0	0	0	0	0	0	0	0	0	0	0	0	0	0	0	0	0	0	0	0	0	0	0	0	0	0	4	0	0	0
k__Bacteria;p__Actinobacteria;c__Actinobacteria;o__Bifidobacteriales;f__Bifidobacteriaceae;g__Bifidobacterium;s__Bifidobacterium_sp._DSM_109963	0	0	0	0	0	0	0	0	0	0	0	0	0	0	0	0	0	0	0	0	0	0	0	0	0	0	0	0	0	0	0	0	0	0	0	0	0	0	0	0	0	0	0	0	3	0	0	0
k__Bacteria;p__Actinobacteria;c__Actinobacteria;o__Bifidobacteriales;f__Bifidobacteriaceae;g__Bifidobacterium;s__Bifidobacterium_sp._GSD1FS	0	0	1	0	0	0	0	0	0	0	0	2	0	0	1	0	0	0	0	0	17	0	0	14	10	0	1	0	0	0	0	1	0	0	0	0	0	0	0	0	0	0	0	0	0	0	0	0
k__Bacteria;p__Actinobacteria;c__Actinobacteria;o__Bifidobacteriales;f__Bifidobacteriaceae;g__Bifidobacterium;s__Bifidobacterium_sp._LMG_31469	0	0	0	0	0	0	0	0	0	0	0	0	0	0	0	0	0	0	0	0	0	0	0	0	0	0	0	0	0	0	0	0	0	0	0	0	0	0	0	0	0	0	0	0	4	0	0	0
k__Bacteria;p__Actinobacteria;c__Actinobacteria;o__Bifidobacteriales;f__Bifidobacteriaceae;g__Bifidobacterium;s__Bifidobacterium_sp._SMA1	3335.52	3330.37	4004.86	4883.9	3792.49	3473.41	3873.23	3094.89	4739.83	3629.94	3282.83	3992.63	3827.63	6728.02	3074.16	4551.23	2128.04	3429	3846.13	5243.54	4257.45	4769.46	2286.26	4817.25	3556.97	2648.05	4053.14	4973.29	3874	5030.88	2937.62	5124.4	4761.18	4234.07	2990.91	2859.16	3257.14	2754.42	4086.74	2315.44	3110.31	2750.27	4497.31	4454.53	3440.55	2984.76	3416.16	4869.47
k__Bacteria;p__Actinobacteria;c__Actinobacteria;o__Bifidobacteriales;f__Bifidobacteriaceae;g__Bifidobacterium;s__Bifidobacterium_sp._UTBIF-56	0	0	0	0	0	0	0	0	0	0	0	0	0	0	0	0	0	0	0	0	0	0	0	0	0	0	0	0	0	0	0	0	0	0	0	0	0	0	0	0	0	0	0	0	3	0	0	0
k__Bacteria;p__Actinobacteria;c__Actinobacteria;o__Bifidobacteriales;f__Bifidobacteriaceae;g__Bifidobacterium;s__Bifidobacterium_sp._WCA-178-WT-4B	3	0	0	0	0	0	0	0	0	0	0	0	0	0	0	0	0	0	0	0	0	0	0	0	0	0	0	0	0	0	0	0	0	0	0	0	0	0	0	0	0	0	0	0	0	0	0	0
k__Bacteria;p__Actinobacteria;c__Actinobacteria;o__Bifidobacteriales;f__Bifidobacteriaceae;g__Bifidobacterium;s__Bifidobacterium_thermophilum	0	2	2.688	0	0	0	0	0	0	0	0	0	0	0	1	0	0	0	0	0	12.281	0	0	0	7	0	0	0	0	0	0	0	0	0	0	0	0	0	0	0	0	0	0	0	0	0	0	0
k__Bacteria;p__Actinobacteria;c__Actinobacteria;o__Bifidobacteriales;f__Bifidobacteriaceae;g__Bifidobacterium;s__Bifidobacterium_tibiigranuli	215.873	151.571	164.106	294.448	238.311	203.083	241.006	183.838	213.018	209.969	212.771	249.289	215.383	212.768	204.772	256.63	166.271	203.64	193.467	294.591	199.741	263.788	155.755	187.129	246.71	194.796	271.518	247.062	234.513	220.112	179.981	222.417	277.225	154.194	253.284	175.563	130.25	149.622	167.012	128.75	188.895	182.924	262.534	238.454	165.041	239.166	191.489	221.909
k__Bacteria;p__Actinobacteria;c__Actinobacteria;o__Bifidobacteriales;f__Bifidobacteriaceae;g__Gardnerella;s__Gardnerella_sp._26-12	0	0	12	0	5	0	0	0	0	0	0	0	55.16	0	0	2	0	0	0	0	347	0	3	2685.22	0	0	3	0	1	0	0	0	0	0	0	0	0	0	0	0	0	0	0	0	0	0	0	0
k__Bacteria;p__Actinobacteria;c__Actinobacteria;o__Bifidobacteriales;f__Bifidobacteriaceae;g__Gardnerella;s__Gardnerella_sp._DNF01162	6	0	87.5	0	36	0	0	0	0	0	1	2.238	273	0	15.2	14	0	8	1	1	1403.13	1	22	19251.4	110	0	28.981	0	1	0	0	8	0	0	0	0	0	0	0	0	0	0	0	0	0	0	0	0
k__Bacteria;p__Actinobacteria;c__Actinobacteria;o__Bifidobacteriales;f__Bifidobacteriaceae;g__Gardnerella;s__Gardnerella_sp._KA00735	0	0	4	0	0	0	0	0	0	0	0	15	1	0	1	0	0	0	0	0	44.685	0	0	526.914	67.549	0	1	0	0	0	0	0	0	0	0	0	0	0	0	0	0	0	0	0	0	0	0	0
k__Bacteria;p__Actinobacteria;c__Actinobacteria;o__Bifidobacteriales;f__Bifidobacteriaceae;g__Gardnerella;s__Gardnerella_vaginalis	390.01	5599.09	6140.12	11	835.193	5	5	23	51.984	18.733	28	22964.9	10429.6	79	3919.98	427.015	88.587	303.592	112	207.052	124718	121	947.951	435241	63244.2	3	2514.54	339	1187.63	58	342.456	348.419	27	85	433.317	1	51.313	1351.23	2392.01	1	346.424	34	3378.67	18	14	3	2316.55	411.793
k__Bacteria;p__Actinobacteria;c__Actinobacteria;o__Bifidobacteriales;f__Bifidobacteriaceae;g__Parascardovia;s__Parascardovia_denticolens	0	0	0	0	0	0	0	0	0	0	0	0	0	0	3	0	0	0	0	0	0	0	0	0	0	0	0	0	0	0	0	0	0	0	0	0	0	0	0	0	0	0	0	0	0	0	0	0
k__Bacteria;p__Actinobacteria;c__Actinobacteria;o__Bifidobacteriales;f__Bifidobacteriaceae;g__unclassified;s__Bifidobacteriaceae_bacterium_GH005	11	0	185.694	0	49	0	0	0	0	0	1	0	467.781	0	10.451	37	1	13	9	6	6556.23	1.5	32.069	27714.2	1	0	70	0	10	0	0	46	3	0	0	0	2	0	0	0	0	0	0	0	0	0	0	0
k__Bacteria;p__Actinobacteria;c__Actinobacteria;o__Bifidobacteriales;f__Bifidobacteriaceae;g__unclassified;s__Bifidobacteriaceae_bacterium_GH022	0	0	1	0	0	0	0	0	0	0	0	0	0	0	32	0	0	0	0	0	13.233	0	0	0	0	0	1	0	0	0	0	0	0	0	0	0	0	0	0	0	0	0	0	0	0	0	0	0
k__Bacteria;p__Actinobacteria;c__Actinobacteria;o__Bifidobacteriales;f__Bifidobacteriaceae;g__unclassified;s__Bifidobacteriaceae_bacterium_N170	0	0	26	0	0	0	0	0	0	0	0	8.029	0	0	116.553	1.985	0	0	0	0	5	0	0	0	0	0	7	0	0	0	0	0	0	0	0	0	0	0	0	0	0	0	0	0	0	0	0	0
k__Bacteria;p__Actinobacteria;c__Actinobacteria;o__Bifidobacteriales;f__Bifidobacteriaceae;g__unclassified;s__Bifidobacteriaceae_bacterium_NR003	8	0	0	0	0	0	0	0	0	0	0	0	0	0	0	0	0	0	0	0	8.273	0	31	0	0	0	0	0	0	0	0	0	0	0	0	0	0	0	0	0	0	0	0	0	0	0	0	12.496
k__Bacteria;p__Actinobacteria;c__Actinobacteria;o__Bifidobacteriales;f__Bifidobacteriaceae;g__unclassified;s__Bifidobacteriaceae_bacterium_NR015	0	0	8	0	3	0	0	0	0	0	0	5	21.818	0	3	0	0.5	2	0	0	53.108	0	0	1334.55	6	0	3	0	0	0	0	0	0	0	0	0	0	0	0	0	0	0	0	0	0	0	0	0
k__Bacteria;p__Actinobacteria;c__Actinobacteria;o__Bifidobacteriales;f__Bifidobacteriaceae;g__unclassified;s__Bifidobacteriaceae_bacterium_NR016	25	1	286.2	1	69	0	0	0	1	1	2	61.637	984.841	1	30.096	30	0	10	4	0	2681.08	4	47	39423	287.866	0	68.211	0	18	0	0	12	1	0	0	0	1	8	0	0	5	0	3	0	0	0	21	3
k__Bacteria;p__Actinobacteria;c__Actinobacteria;o__Bifidobacteriales;f__Bifidobacteriaceae;g__unclassified;s__Bifidobacteriaceae_bacterium_NR017	7	0	132.329	0	38	0	0	0	0	0	1	47.142	302	0	14	13	3	19	2	4	4932.1	6	21	17796.2	96.613	0	46	0	8	0	0	22	2	0	0	0	0	0	0	0	0	0	0	0	2	0	0	0
k__Bacteria;p__Actinobacteria;c__Actinobacteria;o__Bifidobacteriales;f__Bifidobacteriaceae;g__unclassified;s__Bifidobacteriaceae_bacterium_NR019	1	0	55.5	0	23	0	0	0	0	0	0	3.803	105	0	4	9	2	6	0	0	1962.84	2	11	7603.03	0	0	13	0	3	0	0	12	0	0	0	0	0	0	0	0	0	0	0	0	0	0	0	0
k__Bacteria;p__Actinobacteria;c__Actinobacteria;o__Bifidobacteriales;f__Bifidobacteriaceae;g__unclassified;s__Bifidobacteriaceae_bacterium_NR020	4	0	114	0	16	0	0	0	0	0	0	31.333	248.428	2	19.436	8	0	7	1	0	869.081	0	17	16642.2	73.386	0	518	0	1	0	0.5	2	0	0	0	0	0	1	1	0	0	0	0	0	0	0	0	36
k__Bacteria;p__Actinobacteria;c__Actinobacteria;o__Bifidobacteriales;f__Bifidobacteriaceae;g__unclassified;s__Bifidobacteriaceae_bacterium_NR021	2	0	33	0	6	0	0	0	0	0	0	3.692	96.358	0	3	3	1.913	1	1	1	1123.33	0	6	4876.06	0	0	16	0	1	0	0	6	0	0	0	0	0	0	0	0	0	0	0	0	0	0	0	0
k__Bacteria;p__Actinobacteria;c__Actinobacteria;o__Bifidobacteriales;f__Bifidobacteriaceae;g__unclassified;s__Bifidobacteriaceae_bacterium_NR026	0	0	16	0	0	0	0	0	0	0	0	2	15	0	87.03	0	0	0	1	0	117	0	0	0	1	0	11.432	0	0	0	0	1	0	0	0	0	0	0	0	0	0	0	0	0	0	0	0	0
k__Bacteria;p__Actinobacteria;c__Actinobacteria;o__Bifidobacteriales;f__Bifidobacteriaceae;g__unclassified;s__Bifidobacteriaceae_bacterium_NR047	2	0	1	0	0	0	0	0	0	0	0	0	4	0	0	1	0	0	0	1	307.191	0	1	427.417	0	0	0	0	0	0	0	1	0	0	0	0	0	0	0	0	0	0	0	0	0	0	0	0
k__Bacteria;p__Actinobacteria;c__Actinobacteria;o__Bifidobacteriales;f__Bifidobacteriaceae;g__unclassified;s__Bifidobacteriaceae_bacterium_VN002	0	0	24	0	0	0	0	0	0	0	0	42	5	0	70.729	0	0	0	0	0	113.931	0	0	125	64.146	0	9	0	1	0	0	0	0	0	0	0	0	0	0	0	0	0	0	0	0	0	0	0
k__Bacteria;p__Actinobacteria;c__Actinobacteria;o__Bifidobacteriales;f__Bifidobacteriaceae;g__unclassified;s__Bifidobacteriaceae_bacterium_VN003	8	0	154.003	0	56.807	0	0	0	0	0	0	10.97	351.42	0	29	19	6	14	4	1	5325.91	4	30	21091.1	1	0	39	0	5	0	2	30	4	0	0	0	0	1	0	0	0	0	0	0	0	0	1	0
k__Bacteria;p__Actinobacteria;c__Actinobacteria;o__Bifidobacteriales;f__Bifidobacteriaceae;g__unclassified;s__Bifidobacteriaceae_bacterium_WP012	0	0	4	0	0	0	0	0	0	0	0	0	7	0	4	0	0	0	0	0	56.499	0	0	0	0	0	0	0	0	0	0	0	0	0	0	0	0	0	0	0	0	0	0	0	0	0	0	0
k__Bacteria;p__Actinobacteria;c__Actinobacteria;o__Bifidobacteriales;f__Bifidobacteriaceae;g__unclassified;s__Bifidobacteriaceae_bacterium_WP021	11	0	133.594	0	23	0	0	0	0	0	0	2	470.593	0	14	11	0	9	0	1	775.067	0	25	22434.3	0	0	61.286	0	3	0	0	2	0	0	0	0	0	0	0	0	0	0	0	0	0	0	0	0
k__Bacteria;p__Actinobacteria;c__Actinobacteria;o__Bifidobacteriales;f__Bifidobacteriaceae;g__unclassified;s__Bifidobacteriaceae_bacterium_WP022	3	0	46.5	0	18	0	0	0	0	0	0	0	143.673	0	5	8	1	4	3	3	2741.48	1	6	6912.85	15	0	10	0	5	0	0	5	0	0	0	0	0	0	0	0	0	0	0	0	0	0	0	0
k__Bacteria;p__Actinobacteria;c__Actinobacteria;o__Corynebacteriales;f__Corynebacteriaceae;g__Corynebacterium;s__Corynebacterium_diphtheriae	659.674	476.905	677.839	744.491	595.9	593.128	641.648	529.098	550.014	621.447	674.91	591.738	615.13	783.433	535.718	718.854	525.024	617.294	659.409	734.709	615.913	754.326	498.128	745.562	731.568	569.236	686.969	707.767	607.848	776.993	627.818	747.483	832.065	603.835	621.96	593.061	535.493	460.399	641.289	444.503	596.569	476.978	706.71	708.742	554.157	523.742	576.091	631.187
k__Bacteria;p__Actinobacteria;c__Actinobacteria;o__Corynebacteriales;f__Corynebacteriaceae;g__Corynebacterium;s__Corynebacterium_glutamicum	3	0	0	0	3	0	0	2	0	0	0	2	1	2	1	2	1	0	0	1	0	0	2	0	0	0	3	0	1	1	1	2	0	0	0	1	7	2	0	1	0	0	2	3	0	4	0	1
k__Bacteria;p__Actinobacteria;c__Actinobacteria;o__Corynebacteriales;f__Corynebacteriaceae;g__Corynebacterium;s__Corynebacterium_jeikeium	2	0	2.312	0	0	0	0	0	0	0	0	0	0	0	3	0	0	0	0	0	65.719	0	0	0	41	0	0	0	0	0	0	0	0	0	0	0	0	0	0	0	0	0	0	0	0	0	0	0
k__Bacteria;p__Actinobacteria;c__Actinobacteria;o__Corynebacteriales;f__Corynebacteriaceae;g__Corynebacterium;s__Corynebacterium_pyruviciproducens	4	0	9	0	0	0	0	0	0	0	0	0	0	0	4	0	0	0	0	0	37	0	0	0	138.054	0	1	0	0	0	0	0	0	0	0	0	0	0	0	0	0	0	0	0	0	0	0	0
k__Bacteria;p__Actinobacteria;c__Actinobacteria;o__Corynebacteriales;f__Corynebacteriaceae;g__Corynebacterium;s__Corynebacterium_striatum	1	0	4	0	0	0	0	0	0	0	0	0	0	0	0	0	0	0	0	0	28	0	0	0	3	0	0	0	0	0	0	0	0	0	0	0	0	0	0	0	0	0	0	0	0	0	0	0
k__Bacteria;p__Actinobacteria;c__Actinobacteria;o__Corynebacteriales;f__Corynebacteriaceae;g__Corynebacterium;s__Corynebacterium_urealyticum	0	0	0	0	0	0	0	0	0	0	0	0	0	0	0	0	0	0	0	0	3	0	0	0	0	0	0	0	0	0	0	0	0	0	0	0	0	0	0	0	0	0	0	0	0	0	0	0
k__Bacteria;p__Actinobacteria;c__Actinobacteria;o__Corynebacteriales;f__Dietziaceae;g__Dietzia;s__Dietzia_maris	171.371	52	129.324	178.489	211.231	96.381	127.218	71	86.099	111	114.328	146.927	128.92	151	87	118.975	87.973	64	117.453	144.946	139.482	148.124	97	161.223	177.755	79	164.863	126.232	97	116.871	114.007	150.468	74	147	103	137.715	139.168	106.13	115.616	92	89.983	95	124.71	120	123.803	134.459	141.365	135.874
k__Bacteria;p__Actinobacteria;c__Actinobacteria;o__Corynebacteriales;f__Mycobacteriaceae;g__Mycobacterium;s__Mycobacterium_angelicum	28.934	19	29.875	37.628	30.772	38.614	17	32.172	32.2	27.952	38.448	20.056	32.286	32.332	35.175	22.979	21.302	31.899	31.467	23.124	28.101	42.885	18.429	25.539	49.929	26.834	26.626	45.93	29.274	29	18.049	21.713	48.083	22.834	38.426	29.187	34.084	22.73	30.043	20.8	16.572	14.331	31.028	28.208	34.502	34.006	35.126	39.818
k__Bacteria;p__Actinobacteria;c__Actinobacteria;o__Corynebacteriales;f__Mycobacteriaceae;g__Mycobacterium;s__Mycobacterium_gallinarum	4.003	0	0	0	0	0	0	0	0	0	0	0	0	1	0	0	0	0	0	0	0	0	0	0	8.036	0	7.068	2.478	3.136	5	1.264	0	0	0	0	0	0	0	0	0	0	0	0	0	0	0	0	0
k__Bacteria;p__Actinobacteria;c__Actinobacteria;o__Corynebacteriales;f__Mycobacteriaceae;g__Mycobacterium;s__Mycobacterium_kansasii	97.546	71.897	93.705	124.616	141.578	113.111	110.268	70.896	120.664	125.239	115.164	130.204	110.728	138.09	69.041	141.122	78.503	107.544	146.198	121.041	109.475	123.289	81.796	149.076	90.779	99.653	127.705	127.906	99.892	155.317	90.964	102.954	134.754	78.268	113.806	101.47	82.992	92.203	77.294	80.757	92.861	57.627	117.211	115.254	91.567	79.462	110.941	108.448
k__Bacteria;p__Actinobacteria;c__Actinobacteria;o__Corynebacteriales;f__Mycobacteriaceae;g__Mycobacterium;s__Mycobacterium_kubicae	875.298	653.438	908.756	1087.05	893.546	852.246	935.505	715.053	987.734	911.738	887.043	1070.93	973.651	1063.69	828.544	1108.72	773.376	752.781	996.601	1254.16	900.937	1175.42	732.523	999.431	999.16	870.083	1068.17	983.844	820.388	1051.37	773.73	1123.44	1223.78	799.332	800.935	763.259	702.917	577.065	835.92	576.127	768.859	640.951	1088.77	993.609	715.697	776.611	864.09	953.379
k__Bacteria;p__Actinobacteria;c__Actinobacteria;o__Corynebacteriales;f__Mycobacteriaceae;g__Mycobacterium;s__Mycobacterium_sp._1100029.7	88.892	83.736	119.068	118.706	77.237	100.84	91.296	96.526	120.155	105.834	88.458	128.895	103.584	110.431	81.166	126.76	77.489	94.29	108.913	125.773	88.009	118.329	77.91	113.89	117.853	94.031	103.921	106.025	75.042	79.481	76.714	116.669	119.286	90.38	86.731	75.283	79.387	82.871	112.291	56.176	77.228	59.467	85.346	110.016	89.038	80.173	79.97	97.644
k__Bacteria;p__Actinobacteria;c__Actinobacteria;o__Corynebacteriales;f__Mycobacteriaceae;g__Mycobacterium;s__Mycobacterium_sp._1554424.7	1479.43	1183.24	1397.55	1664.52	1366.47	1469.55	1452.45	1327.07	1524.02	1341.31	1411.62	1615.34	1493.48	1709.9	1205.13	1598.14	1224.02	1332.17	1388.31	1734.47	1373.98	1567.56	1201.92	1664.22	1560.27	1378.97	1582.22	1590.91	1329.82	1685.73	1263.21	1621.74	1783.92	1290.04	1327.69	1204.58	1093.06	1085.03	1437.9	940.731	1265.51	991.857	1589.79	1555.97	1177.93	1184.29	1374.9	1533.13
k__Bacteria;p__Actinobacteria;c__Actinobacteria;o__Corynebacteriales;f__Mycobacteriaceae;g__Mycobacterium;s__Mycobacterium_sp._KBS0706	4.69	0	1	0	0	0	0	0	0	0	0	0	0	0	0	0	0	0	0	0	0	0	0	0	7.596	0	6.797	4.859	1.427	3.542	1.501	0	0	0	0	0	0	0	0	0	0	0	0	0	0	0	0	0
k__Bacteria;p__Actinobacteria;c__Actinobacteria;o__Corynebacteriales;f__Mycobacteriaceae;g__Mycobacterium;s__Mycobacterium_tuberculosis	15463.2	14101.1	17822.5	20714.5	17694.3	16805.6	16454.9	15688.2	18837	16450	15777.6	20910	17357.6	21625.5	14389.7	20651.8	13076.4	16269.3	17712.2	21859	17427	21483	12148.7	19169.8	17965.9	15649.1	19306.2	20097.3	16945.5	20792.4	15040.2	19846.9	21873.2	16170.4	15029	14192.3	13249.9	12123.3	17485	10941.9	13738.2	11859.5	21064.7	18616	14179.5	14986.6	16780	18683.8
k__Bacteria;p__Actinobacteria;c__Actinobacteria;o__Corynebacteriales;f__Mycobacteriaceae;g__Mycobacteroides;s__Mycobacteroides_abscessus	3933.91	2896.66	3841.72	4793.31	3939.39	3509.22	3850.7	3186.79	4126.97	3373.81	3797.09	4034.13	4097.98	5030.28	3197.05	4675.89	2894.87	3219.72	4021.34	4979.8	3820.91	4285.94	2558.55	4032.06	4472.81	3113.92	4597.38	4278.75	3800.13	4644.86	3331.98	4501.69	5073.07	3556.78	3152.97	3036.51	3380.68	2732.46	3878.55	2547.63	3219.13	2383.04	4023.07	4217.31	3549.63	3245.22	3140.07	4349.54
k__Bacteria;p__Actinobacteria;c__Actinobacteria;o__Corynebacteriales;f__Mycobacteriaceae;g__Mycolicibacterium;s__Mycolicibacterium_gadium	3	0	1	0	0	0	0	0	0	0	0	0	0	0	0	0	0	0	0	0	0	0	0	0	2.268	0	3	9	8	4	1	0	0	0	0	0	0	0	0	0	0	0	0	0	0	0	0	0
k__Bacteria;p__Actinobacteria;c__Actinobacteria;o__Corynebacteriales;f__Mycobacteriaceae;g__unclassified;s__Mycobacteriaceae_bacterium_1482268.1	26.387	10.578	23	28.047	16.012	23.82	30.901	10.334	23.142	33	24.263	38.536	26.203	28.183	18	22.804	17.288	11	36.333	24.413	18.875	21.489	15.47	32	39.829	10.84	18.613	21.086	14.113	25.015	34.567	26.363	34.637	13.117	29.132	21	17.007	11.682	25.071	12	13.669	15.828	30.439	18.712	11	17.857	16.99	28.555
k__Bacteria;p__Actinobacteria;c__Actinobacteria;o__Corynebacteriales;f__Nocardiaceae;g__Nocardia;s__Nocardia_abscessus	0	0	4	0	0	0	0	0	0	0	0	0	0	0	0	0	0	0	0	0	0	0	0	0	2	0	4	2.917	3	1.636	1.511	0	0	0	0	0	0	0	0	0	0	0	0	0	0	0	0	0
k__Bacteria;p__Actinobacteria;c__Actinobacteria;o__Corynebacteriales;f__Nocardiaceae;g__Nocardia;s__Nocardia_cerradoensis	0	0	0	0	0	3	0	0	0	0	0	2	0	0	0	1	1	2	0	2	0	1	0	0	3	0	1	4	2	2	0	1	1	0	2	0	0	0	1	0	0	1	0	0	0	0	5	0
k__Bacteria;p__Actinobacteria;c__Actinobacteria;o__Corynebacteriales;f__Nocardiaceae;g__unclassified;s__Nocardiaceae_bacterium_YC2-7	18.106	0	26.798	0	0	0	0	0	0	0	0	1	0	0	0	0	0	0	0	0	0	0	0	0	66.735	0	63.852	34.947	46.522	49.423	57.742	0	0	0	0	0	0	0	0	0	0	0	0	0	0	0	0	0
k__Bacteria;p__Actinobacteria;c__Actinobacteria;o__Corynebacteriales;f__unclassified;g__Lawsonella;s__Lawsonella_clevelandensis	0	0	0	0	0	0	0	0	0	0	0	0	0	0	0	0	0	3	0	0	4	0	0	0	0	0	0	0	0	0	0	0	0	0	0	0	0	0	0	0	0	0	0	0	0	0	0	0
k__Bacteria;p__Actinobacteria;c__Actinobacteria;o__Frankiales;f__Frankiaceae;g__Frankia;s__Candidatus_Frankia_datiscae	0	0	0	0	0	0	0	0	0	0	0	0	0	0	0	0	0	0	0	0	0	0	0	0	0	0	0	0	0	0	0	0	0	15.86	18	0	0	0	0	0	0	0	0	0	0	0	0	0
k__Bacteria;p__Actinobacteria;c__Actinobacteria;o__Frankiales;f__Frankiaceae;g__Frankia;s__Candidatus_Frankia_meridionalis	0	0	1.356	0	0	0	0	0	0	0	0	0	0	0	0	0	0	0	0	0	0	0	0	0	1.481	0	5.447	0	5.956	3.958	0	0	0	0	0	0	0	0	0	0	0	0	0	0	0	0	0	0
k__Bacteria;p__Actinobacteria;c__Actinobacteria;o__Frankiales;f__Frankiaceae;g__Frankia;s__Frankia_canadensis	76.977	64.406	114.965	103.161	123.446	94.159	100.507	77.403	93.327	82.357	91.633	148.229	84.019	109.812	82.578	177.19	81.841	69.975	119.415	128.62	106.542	138.314	89.376	119.104	101.484	108.496	88.354	98.869	94.5	98.984	76.784	104.055	100.883	101.542	102.278	99.958	84	54.051	87.485	46.151	102.307	88.4	96.614	134.623	68.852	102.113	80.555	115.559
k__Bacteria;p__Actinobacteria;c__Actinobacteria;o__Frankiales;f__Frankiaceae;g__Frankia;s__Frankia_sp._Ea1.12	52.122	33	40.518	38.241	32.564	40.477	50.065	59.572	61.939	33	37.707	47.751	34.466	47.552	24	79.109	16.103	15.703	32.512	49.504	63.412	27.598	11.339	69.992	57	57.166	43	56	53.394	60.335	49.497	26.961	37.396	29.034	33.593	34.478	32.277	41.13	22.802	29.64	45.662	18	19	22.979	30.997	15	20.82	60.97
k__Bacteria;p__Actinobacteria;c__Actinobacteria;o__Frankiales;f__Frankiaceae;g__Frankia;s__Frankia_symbiont_of_Alnus_glutinosa	0	0	0	0	0	0	0	0	0	0	0	0	0	0	0	0	0	0	0	0	0	0	0	0	0	0	0	0	0	0	0	0	0	9	15	0	0	0	0	0	0	0	0	0	0	0	0	0
k__Bacteria;p__Actinobacteria;c__Actinobacteria;o__Micrococcales;f__Brevibacteriaceae;g__Spelaeicoccus;s__Spelaeicoccus_albus	1	1	3	4.188	0	2	0	0	0	0	0	3	0	5	1	0	0	0	0	1	0	0	0	1	1	1	2	2	1	0	0	0	3	1	2	1	0	0	1	0	0	0	0	0	0	1	5	1
k__Bacteria;p__Actinobacteria;c__Actinobacteria;o__Micrococcales;f__Dermabacteraceae;g__Brachybacterium;s__Brachybacterium_faecium	3	0	1	0	0	0	0	0	0	0	0	0	0	0	0	0	0	0	0	0	0	0	0	0	2	0	3	3	2	4	2	0	0	0	0	0	0	0	0	0	0	0	0	0	0	0	0	0
k__Bacteria;p__Actinobacteria;c__Actinobacteria;o__Micrococcales;f__Microbacteriaceae;g__Agromyces;s__Agromyces_bracchium	0	0	0	0	0	0	0	0	0	0	0	0	0	0	0	0	0	0	0	0	0	0	0	0	0	0	0	0	0	0	0	0	0	2	4	0	0	0	0	0	0	0	0	0	0	0	0	0
k__Bacteria;p__Actinobacteria;c__Actinobacteria;o__Micrococcales;f__Microbacteriaceae;g__Curtobacterium;s__Curtobacterium_flaccumfaciens	0	1	0	0	0	1	0	1	0	1	0	1	0	0	1	2	0	0	0	0	0	0	463.578	433.83	1	1	0	1	0	0	1	107	173.823	0	2	0	0	2	1	1	0	0	0	0	1	2	0	3
k__Bacteria;p__Actinobacteria;c__Actinobacteria;o__Micrococcales;f__Microbacteriaceae;g__Homoserinimonas;s__Homoserinimonas_sp._OAct_916	7	0	5	0	0	0	0	0	0	0	0	0	0	0	0	0	0	0	0	0	0	0	0	0	5	0	8	7	3	7	8	0	0	0	0	0	0	0	0	0	0	0	0	0	0	0	0	0
k__Bacteria;p__Actinobacteria;c__Actinobacteria;o__Micrococcales;f__Microbacteriaceae;g__Microbacterium;s__Microbacterium_arborescens	270.302	216.141	304.125	331.147	278.034	287.343	287.575	279.221	291.641	251.134	329.849	323.711	269.209	316.892	271.906	363.244	232.888	264.23	304.681	299.852	276.886	353.062	220.498	351.427	328.951	302.511	343.652	361.027	269.218	327.863	237.177	353.965	390.696	286.164	283.257	239.883	211.792	214.14	282.229	203.967	251.72	218.405	324.753	312.004	226.786	242.053	282.141	317.295
k__Bacteria;p__Actinobacteria;c__Actinobacteria;o__Micrococcales;f__Microbacteriaceae;g__Microbacterium;s__Microbacterium_esteraromaticum	169.209	167.951	188.831	178.457	175.498	160.632	150.862	184.147	160.601	153.174	136.026	165.882	175.505	206.608	128.448	199.082	163.049	150.975	159.57	194.694	161.31	176.111	124.046	169.078	166.895	175.957	162.222	200.055	163.311	194.228	134.529	188.779	215.861	155.476	159.308	136.636	146.046	110.232	157.542	112.266	126.489	115.08	205.117	197.119	154.952	148.608	162.418	173.492
k__Bacteria;p__Actinobacteria;c__Actinobacteria;o__Micrococcales;f__Microbacteriaceae;g__Microbacterium;s__Microbacterium_hatanonis	0	0	0	0	0	0	0	0	0	0	0	0	0	0	0	0	0	0	0	0	0	0	0	0	0	4	0	0	0	0	0	0	0	0	0	0	0	0	0	0	0	0	0	0	0	0	0	0
k__Bacteria;p__Actinobacteria;c__Actinobacteria;o__Micrococcales;f__Microbacteriaceae;g__Microbacterium;s__Microbacterium_mangrovi	0	0	0	0	0	0	0	0	3	0	0	0	0	0	0	0	0	0	0	0	0	0	0	0	0	0	0	0	0	0	0	0	0	0	0	0	0	0	0	0	0	0	0	0	0	0	0	0
k__Bacteria;p__Actinobacteria;c__Actinobacteria;o__Micrococcales;f__Microbacteriaceae;g__Microbacterium;s__Microbacterium_oleivorans	0	0	0	0	0	0	0	0	0	0	0	3	0	0	0	0	0	0	0	0	0	0	0	0	0	0	0	0	0	0	0	0	0	0	0	0	0	0	0	0	0	0	0	0	0	0	0	0
k__Bacteria;p__Actinobacteria;c__Actinobacteria;o__Micrococcales;f__Microbacteriaceae;g__Microbacterium;s__Microbacterium_sp.	0	0	0	0	0	0	0	0	0	0	3	0	0	0	0	0	0	0	0	0	0	0	0	0	0	0	0	0	0	0	0	0	0	0	0	0	0	0	0	0	0	0	0	0	0	0	0	0
k__Bacteria;p__Actinobacteria;c__Actinobacteria;o__Micrococcales;f__Microbacteriaceae;g__Microbacterium;s__Microbacterium_sp._ABRD_28	0	0	0	0	0	0	0	0	0	0	0	0	0	0	0	0	0	0	0	0	0	0	0	3	0	0	0	0	0	0	0	0	0	0	0	0	0	0	0	0	0	0	0	0	0	0	0	0
k__Bacteria;p__Actinobacteria;c__Actinobacteria;o__Micrococcales;f__Microbacteriaceae;g__Microbacterium;s__Microbacterium_sp._AG1240	0	0	0	0	0	0	0	0	3	0	0	0	0	0	0	0	0	0	0	0	0	0	0	0	0	0	0	0	0	0	0	0	0	0	0	0	0	0	0	0	0	0	0	0	0	0	0	0
k__Bacteria;p__Actinobacteria;c__Actinobacteria;o__Micrococcales;f__Microbacteriaceae;g__Microbacterium;s__Microbacterium_sp._AISO3	10	4	0	3	6	8	2	2	7	3	9	6	13	5	4	5	0	3	3	1	4	4.51	3	1	4	2	7	8	4.01	2	4	3	5	1	0	4	5	1	13	1	4	2	4	11	4	4	9	5
k__Bacteria;p__Actinobacteria;c__Actinobacteria;o__Micrococcales;f__Microbacteriaceae;g__Microbacterium;s__Microbacterium_sp._AK009	0	0	0	0	0	0	0	0	0	0	0	0	0	0	0	0	0	0	0	0	0	0	0	0	0	0	0	0	0	0	0	0	1	0	0	0	0	0	0	3	0	0	0	0	0	0	0	0
k__Bacteria;p__Actinobacteria;c__Actinobacteria;o__Micrococcales;f__Microbacteriaceae;g__Microbacterium;s__Microbacterium_sp._CFH_90308	0	0	0	0	0	0	0	0	0	0	0	0	0	0	0	0	0	0	0	0	0	0	0	0	0	0	0	0	0	3	0	0	0	0	0	0	0	0	0	0	0	0	0	0	0	0	0	0
k__Bacteria;p__Actinobacteria;c__Actinobacteria;o__Micrococcales;f__Microbacteriaceae;g__Microbacterium;s__Microbacterium_sp._CQ0110Y	16	0	18	0	0	0	0	0	0	0	0	0	0	0	0	0	0	0	0	0	0	0	0	0	51.657	0	66.499	40.48	32.47	41	32.498	0	0	0	0	0	0	0	0	0	0	0	0	0	0	0	0	0
k__Bacteria;p__Actinobacteria;c__Actinobacteria;o__Micrococcales;f__Microbacteriaceae;g__Microbacterium;s__Microbacterium_sp._HM58-2	2	0	2	0	0	0	0	0	0	0	0	0	0	0	0	0	0	0	0	0	0	0	0	0	5	0	12	4	5	7	3	0	0	0	0	0	0	0	0	0	0	0	0	0	0	0	0	0
k__Bacteria;p__Actinobacteria;c__Actinobacteria;o__Micrococcales;f__Microbacteriaceae;g__Microbacterium;s__Microbacterium_sp._SLBN-158	0	0	0	0	3	0	0	0	0	0	0	0	0	0	0	0	0	0	0	0	0	0	0	0	0	0	0	0	0	0	0	0	0	0	0	0	0	0	0	0	0	0	0	0	0	0	0	0
k__Bacteria;p__Actinobacteria;c__Actinobacteria;o__Micrococcales;f__Microbacteriaceae;g__Microbacterium;s__Microbacterium_sp._ST-M6	0	0	0	0	0	0	0	0	0	0	0	0	0	0	0	0	0	0	0	0	0	0	0	0	0	3	0	0	0	0	0	0	0	0	0	0	0	0	0	0	0	0	0	0	0	0	0	0
k__Bacteria;p__Actinobacteria;c__Actinobacteria;o__Micrococcales;f__Microbacteriaceae;g__Microbacterium;s__Microbacterium_yannicii	0	3	0	0	0	0	0	0	0	0	0	0	0	0	0	0	0	0	0	0	0	0	0	0	0	0	0	0	0	0	0	0	0	0	0	0	0	0	0	0	0	0	0	0	0	0	0	0
k__Bacteria;p__Actinobacteria;c__Actinobacteria;o__Micrococcales;f__Microbacteriaceae;g__Microcella;s__Microcella_alkaliphila	0	3	0	0	0	0	0	0	0	0	0	0	0	0	0	0	0	0	0	0	0	0	0	0	0	0	0	0	0	0	0	0	0	0	0	0	0	0	0	0	0	0	0	0	0	0	0	0
k__Bacteria;p__Actinobacteria;c__Actinobacteria;o__Micrococcales;f__Microbacteriaceae;g__Mycetocola;s__Mycetocola_lacteus	3	0	0	0	0	0	0	0	0	0	0	0	0	0	0	0	0	0	0	0	0	0	0	0	2	0	6	5	2	3	5	0	0	0	0	0	0	0	0	0	0	0	0	0	0	0	0	0
k__Bacteria;p__Actinobacteria;c__Actinobacteria;o__Micrococcales;f__Micrococcaceae;g__Arthrobacter;s__Arthrobacter_silviterrae	0	0	2	1	0	0	0	0	0	0	0	0	3	0	0	0	0	4	0	0	0	1	0	0	0	0	0	1	0	0	0	0	0	0	2	2	0	0	0	0	0	0	2	1	0	0	0	0
k__Bacteria;p__Actinobacteria;c__Actinobacteria;o__Micrococcales;f__Micrococcaceae;g__Arthrobacter;s__Arthrobacter_sp._B0490	11	0	5.55	0	0	0	0	0	0	0	0	0	0	0	0	0	0	0	0	0	0	0	0	0	22.721	0	21.154	19.908	10	12	14.922	0	0	0	0	0	0	0	0	0	0	0	0	0	0	0	0	0
k__Bacteria;p__Actinobacteria;c__Actinobacteria;o__Micrococcales;f__Micrococcaceae;g__Arthrobacter;s__Arthrobacter_sp._B1805	0	0	7	0	0	0	0	0	0	0	0	0	0	0	0	0	0	0	1	0	0	0	0	0	9.834	0	6.529	3	11.83	8	5.749	0	0	0	0	0	0	0	0	0	0	0	0	0	0	0	0	0
k__Bacteria;p__Actinobacteria;c__Actinobacteria;o__Micrococcales;f__Micrococcaceae;g__Arthrobacter;s__Arthrobacter_sp._D2	21	18	13	30	25	19	15	20	17	18	26	11	13	22	20	25	9	20	29	28	18	29	14	18	24.384	10	20	12	5	17	19	23	22	12.001	11	20.347	15	9	33	9	10	19	17	13	14	9	12	10
k__Bacteria;p__Actinobacteria;c__Actinobacteria;o__Micrococcales;f__Micrococcaceae;g__Arthrobacter;s__Arthrobacter_sp._D4	7	4	4	3	1	3	4	1	2	1	4	0	5	7	3	2	0	2	4	7	4	2	1	3	2	3	2	5	3	3	6	0	6	4	2	1	0	2	5	0	1	2	0	1	7	2	4	1
k__Bacteria;p__Actinobacteria;c__Actinobacteria;o__Micrococcales;f__Micrococcaceae;g__Arthrobacter;s__Arthrobacter_sp._DWC3	2	8	5	7	6	4	4	1	7	1	4	3	5	3	4	4	4	5	5	8	4	2	0	0	4	3	11	12	6	3	7	3	2	1	6	4	1	3	7	2	2	0	11	7	5	3	2	3
k__Bacteria;p__Actinobacteria;c__Actinobacteria;o__Micrococcales;f__Micrococcaceae;g__Arthrobacter;s__Arthrobacter_sp._SX1312	6	6	10	19.131	6	19	14	19	18	8	12	19	12	21	16	8	11	3	18	13	10	19	13	19	15	6	8	20	16	12	5	15	8	8	12	9	7	12	17	3	7	8	6	7	4	11	6	8
k__Bacteria;p__Actinobacteria;c__Actinobacteria;o__Micrococcales;f__Micrococcaceae;g__Arthrobacter;s__Arthrobacter_sp._Y81	5	0	3	0	0	0	0	0	0	0	0	0	0	0	0	0	0	0	0	0	0	0	0	0	4.166	0	5.471	6	6.17	2	3.251	0	0	0	0	0	0	0	0	0	0	0	0	0	0	0	0	0
k__Bacteria;p__Actinobacteria;c__Actinobacteria;o__Micrococcales;f__Micrococcaceae;g__Kocuria;s__Kocuria_rhizophila	0	0	0	0	0	0	0	0	0	0	0	0	0	0	0	0	0	0	0	0	0	0	0	0	3	0	1	3	0	4	6	0	0	0	0	0	0	0	0	0	0	0	0	0	0	0	0	0
k__Bacteria;p__Actinobacteria;c__Actinobacteria;o__Micrococcales;f__Micrococcaceae;g__Nesterenkonia;s__Nesterenkonia_sp._M8	99.635	76.047	110.103	140	94.041	123.47	113.702	77.998	111.944	101.706	77.472	103.388	103.117	107.649	82.005	105.336	95.602	76.548	91.563	115.193	104.903	110.912	73.803	113.42	94.374	98.517	112.612	99.373	71.865	108.743	109.378	113.998	100.641	75.328	116.463	72.385	62.521	64.354	106.352	63.941	79.564	76.766	119.593	81.285	81.118	85.753	84.782	88.295
k__Bacteria;p__Actinobacteria;c__Actinobacteria;o__Micrococcales;f__Micrococcaceae;g__Nesterenkonia;s__Nesterenkonia_sphaerica	1	0	2	0	0	0	0	0	0	0	0	0	0	0	0	0	0	0	0	0	0	0	0	0	3	0	0	10	5	3	1	0	0	0	0	0	3	0	0	0	0	0	0	0	0	0	0	0
k__Bacteria;p__Actinobacteria;c__Actinobacteria;o__Micrococcales;f__Micrococcaceae;g__Paenarthrobacter;s__Paenarthrobacter_nicotinovorans	0	0	0	0	0	0	0	0	0	0	0	0	0	0	0	0	0	0	0	0	0	0	0	0	0	0	0	0	0	0	0	0	0	8	12.55	0	0	0	0	0	0	0	0	0	0	0	0	0
k__Bacteria;p__Actinobacteria;c__Actinobacteria;o__Micrococcales;f__Micrococcaceae;g__Paeniglutamicibacter;s__Paeniglutamicibacter_antarcticus	511.92	418.159	469.448	665.845	450.884	480.546	477.756	436.213	509.03	444.931	542.771	583.997	476.141	572.547	413.395	598.947	385.935	482.114	492.708	603.417	507.311	621.966	437.94	569.554	529.165	519.711	573.088	544.001	452.701	475.575	429.464	566.531	648.851	411.763	461.512	399.554	378.071	393.399	486.709	322.344	374.081	293.138	599.452	487.144	428.763	414.965	476.711	447.341
k__Bacteria;p__Actinobacteria;c__Actinobacteria;o__Micrococcales;f__unclassified;g__unclassified;s__Micrococcales_bacterium	0	0	0	0	0	0	0	0	0	0	0	0	0	0	0	0	0	0	0	0	0	0	0	0	0	0	0	0	0	0	0	0	0	0	0	0	0	0	0	0	0	0	0	3	0	0	0	0
k__Bacteria;p__Actinobacteria;c__Actinobacteria;o__Micromonosporales;f__Micromonosporaceae;g__Actinoplanes;s__Actinoplanes_atraurantiacus	0	0	0	4	0	0	0	0	0	0	0	0	0	0	0	0	0	0	0	0	0	0	0	0	0	0	0	0	0	0	0	0	0	0	0	0	0	0	0	0	0	0	0	0	0	0	0	0
k__Bacteria;p__Actinobacteria;c__Actinobacteria;o__Micromonosporales;f__Micromonosporaceae;g__Actinoplanes;s__Actinoplanes_missouriensis	0	0	0	0	0	0	0	0	0	0	0	0	0	0	0	0	0	0	0	0	0	0	0	0	0	0	0	0	0	1	3	0	0	0	0	0	0	0	0	0	0	0	0	0	0	0	0	0
k__Bacteria;p__Actinobacteria;c__Actinobacteria;o__Micromonosporales;f__Micromonosporaceae;g__Longispora;s__Longispora_albida	3	0	0	0	0	0	0	0	0	0	0	0	0	0	0	0	0	0	0	0	0	0	0	0	0	0	0	0	0	0	0	0	0	0	0	0	0	0	0	0	0	0	0	0	0	0	0	0
k__Bacteria;p__Actinobacteria;c__Actinobacteria;o__Micromonosporales;f__Micromonosporaceae;g__Planosporangium;s__Planosporangium_flavigriseum	1.353	0	3.873	0	0	0	0	0	0	0	0	0	0	0	0	0	0	0	0	0	0	0	0	0	13.878	0	4.999	3.613	7.947	4.804	5.838	0	0	0	0	0	0	0	0	0	0	0	0	0	0	0	0	0
k__Bacteria;p__Actinobacteria;c__Actinobacteria;o__Propionibacteriales;f__Nocardioidaceae;g__Kribbella;s__Kribbella_sp._NEAU-SW521	65.813	0	48.726	0	0	0	0	0	0	0	0	0	1	0	0	0	0	0	1	0	0	0	0	0	153.025	0	150.765	116.66	89.769	123.997	134.37	0	0	0	0	0	0	0	0	0	0	0	0	0	0	0	0	0
k__Bacteria;p__Actinobacteria;c__Actinobacteria;o__Propionibacteriales;f__Nocardioidaceae;g__Nocardioides;s__Nocardioides_sp.	0	0	0	0	0	0	0	0	0	0	0	0	0	0	0	0	0	0	0	0	0	0	0	0	0	0	0	0	0	0	0	0	0	4	0	0	0	0	0	0	0	0	0	0	0	0	0	0
k__Bacteria;p__Actinobacteria;c__Actinobacteria;o__Propionibacteriales;f__Nocardioidaceae;g__Nocardioides;s__Nocardioides_sp._BN130099	3	4	6	0	0	2	1	7	2	0	4	0	1	3	0	1	0	1	0	1	0	2	1	1	1	3	0	0	2	0	1	0	2	2	2	0	1	2	0	0	2	0	2	0	1	0	1	1
k__Bacteria;p__Actinobacteria;c__Actinobacteria;o__Propionibacteriales;f__Nocardioidaceae;g__Nocardioides;s__Nocardioides_sp._SB3-45	0	0	0	0	0	0	0	0	0	0	0	0	0	0	0	0	0	0	0	0	0	3	0	0	0	0	0	0	0	0	0	0	0	0	0	0	0	0	0	0	0	0	0	0	0	0	0	0
k__Bacteria;p__Actinobacteria;c__Actinobacteria;o__Propionibacteriales;f__Nocardioidaceae;g__Nocardioides;s__Nocardioides_sp._YIM_123512	1.287	0	3.438	0	0	0	0	0	0	0	0	0	0	0	0	0	0	0	0	0	0	0	0	0	15.186	0	15.052	5.086	6.361	7.574	14.859	0	0	0	0	0	0	0	0	0	0	0	0	0	0	0	0	0
k__Bacteria;p__Actinobacteria;c__Actinobacteria;o__Propionibacteriales;f__Nocardioidaceae;g__unclassified;s__Nocardioidaceae_bacterium	0	0	0	4	0	0	0	0	0	0	0	0	0	0	0	0	0	0	0	0	0	0	0	0	0	0	0	0	0	0	0	0	0	0	0	0	0	0	0	0	0	0	0	0	0	0	0	0
k__Bacteria;p__Actinobacteria;c__Actinobacteria;o__Propionibacteriales;f__Propionibacteriaceae;g__Cutibacterium;s__Cutibacterium_acnes	76.038	91.183	100.456	98.365	100.474	94.773	106.677	76.047	60.935	89.106	98.645	100.717	100.575	67.173	82.633	87.847	71.384	85.625	114.389	114.003	80.08	79.837	88.265	72.436	106.82	92.889	106.062	74.021	70.826	120.074	112.872	68.874	79.102	65.799	63	72.811	80	41.883	90.791	67.243	32	63.565	105.311	82.465	108.303	60.219	76.303	78.451
k__Bacteria;p__Actinobacteria;c__Actinobacteria;o__Propionibacteriales;f__Propionibacteriaceae;g__Propionibacterium;s__Propionibacterium_freudenreichii	0	0	0	0	0	0	0	0	0	0	0	0	0	0	0	0	0	0	0	0	17	0	0	0	0	0	0	0	0	0	0	0	0	0	0	0	0	0	0	0	0	0	0	0	0	0	0	0
k__Bacteria;p__Actinobacteria;c__Actinobacteria;o__Pseudonocardiales;f__Pseudonocardiaceae;g__Amycolatopsis;s__Amycolatopsis_australiensis	2	0	0	3	0	4	1	2	0	1	0	2	0	1.206	2	8.262	3	1	1	0	0	0	1	3	2	1	1.201	0	4	5	1	2	2	3	0	0	2	3	2	1	1	0	3.603	4	0	4	0	1
k__Bacteria;p__Actinobacteria;c__Actinobacteria;o__Pseudonocardiales;f__Pseudonocardiaceae;g__Amycolatopsis;s__Amycolatopsis_vastitatis	148.514	215.541	111.969	166	134.607	146.03	273.035	184.909	220.312	163.302	216.699	440.323	157.718	226.238	103.913	198.031	88.024	139.752	316.353	105.573	224.945	198.866	142.498	141.994	127.519	93.628	140.643	227.237	430.645	188.593	101.96	353.261	185.728	243	61	129	111.824	194.781	129	134	127.565	162.618	216.224	147.195	103.047	98.576	177.218	133.964
k__Bacteria;p__Actinobacteria;c__Actinobacteria;o__Pseudonocardiales;f__Pseudonocardiaceae;g__Amycolatopsis;s__Amycolatopsis_xylanica	0	0	0	0	0	0	0	0	0	1	0	0	0	0	0	0	0	0	0	4	0	0	1	0	0	0	1	0	0	0	1	0	0	0	0	0	0	0	0	0	0	0	1	5	0	0	0	0
k__Bacteria;p__Actinobacteria;c__Actinobacteria;o__Pseudonocardiales;f__Pseudonocardiaceae;g__Goodfellowiella;s__Goodfellowiella_sp._AN110305	0	0	0	0	0	0	0	0	0	0	0	0	0	0	0	0	0	0	0	0	0	0	0	0	0	1	0	0	0	0	0	1	3	11	3	1	1	0	0	0	0	0	0	0	0	0	0	0
k__Bacteria;p__Actinobacteria;c__Actinobacteria;o__Pseudonocardiales;f__Pseudonocardiaceae;g__Lechevalieria;s__Lentzea_aerocolonigenes	0	0	0	1	1	0	0	0	1	0	2	0	0	0	0	0	0	0	0	0	0	0	0	0	0	0	0	1	0	0	0	0	0	0	0	0	0	1	0	3	0	0	1	0	0	0	0	5
k__Bacteria;p__Actinobacteria;c__Actinobacteria;o__Pseudonocardiales;f__Pseudonocardiaceae;g__Lentzea;s__Lentzea_sp._FXJ1.1311	0	0	0	0	0	0	0	0	0	0	0	0	0	0	0	0	0	0	0	0	0	0	0	0	0	0	0	0	0	0	0	0	0	3	0	0	0	0	0	0	0	0	0	0	0	0	0	0
k__Bacteria;p__Actinobacteria;c__Actinobacteria;o__Pseudonocardiales;f__Pseudonocardiaceae;g__Pseudonocardia;s__Pseudonocardia_sp._EV170527-09	0	0	0	0	0	0	0	0	0	0	0	0	0	0	0	0	0	0	0	0	0	0	0	0	0	0	0	0	0	0	0	0	0	3	0	0	0	0	0	0	0	0	0	0	0	0	0	0
k__Bacteria;p__Actinobacteria;c__Actinobacteria;o__Streptomycetales;f__Streptomycetaceae;g__Kitasatospora;s__Kitasatospora_cheerisanensis	0	0	0	0	0	0	0	0	0	0	0	0	0	0	0	3	0	1	0	0	0	1	0	0	0	0	0	0	1	0	0	0	0	0	0	0	0	0	0	0	0	0	2	0	0	0	0	1
k__Bacteria;p__Actinobacteria;c__Actinobacteria;o__Streptomycetales;f__Streptomycetaceae;g__Kitasatospora;s__Kitasatospora_sp._MMS16-CNU292	0	0	0	0	0	1	0	0	0	0	0	0	0	0	0	0	0	2	0	6	0	0	0	0	0	0	0	0	0	0	0	1	0	0	0	0	0	0	0	0	0	0	0	0	0	0	0	0
k__Bacteria;p__Actinobacteria;c__Actinobacteria;o__Streptomycetales;f__Streptomycetaceae;g__Streptacidiphilus;s__Streptacidiphilus_sp._PB12-B1b	1	0	0	0	0	0	0	0	0	0	0	0	0	0	0	0	0	0	0	0	0	0	0	0	1.306	0	3.873	0	0	2.781	0	0	0	0	0	0	0	0	0	0	0	0	0	0	0	0	0	0
k__Bacteria;p__Actinobacteria;c__Actinobacteria;o__Streptomycetales;f__Streptomycetaceae;g__Streptomyces;s__Streptomyces_albulus	0	0	0	1	0	3	0	0	1	0	0	3	0	0	1	0	0	0	1	0	0	0	0	5	0	0	1	0	0	0	0	2	0	0	0	0	0	0	0	1	1	0	0	0	1	0	0	0
k__Bacteria;p__Actinobacteria;c__Actinobacteria;o__Streptomycetales;f__Streptomycetaceae;g__Streptomyces;s__Streptomyces_gilvigriseus	1	0	1	0	0	0	0	0	0	0	0	0	0	0	0	0	0	0	0	0	0	0	0	0	6	0	1	1	1	5	2	0	0	0	0	0	0	0	0	0	0	0	0	0	0	0	0	0
k__Bacteria;p__Actinobacteria;c__Actinobacteria;o__Streptomycetales;f__Streptomycetaceae;g__Streptomyces;s__Streptomyces_iakyrus	1	0	0	0	0	0	0	0	0	0	0	0	0	0	0	0	0	0	0	0	0	0	0	0	0	0	3.235	0	0	1	0	0	0	0	0	0	0	0	0	0	0	0	0	0	0	0	0	0
k__Bacteria;p__Actinobacteria;c__Actinobacteria;o__Streptomycetales;f__Streptomycetaceae;g__Streptomyces;s__Streptomyces_kanasensis	1	2	0	0	0	1	1	5	1	0	1	0	0	0	1	0	2	0	1	0	5	0	0	0	0	2	0	0	0	0	0	4	1	0	0	0	0	1	1	3	0	0	5	0	0	1	5	0
k__Bacteria;p__Actinobacteria;c__Actinobacteria;o__Streptomycetales;f__Streptomycetaceae;g__Streptomyces;s__Streptomyces_monashensis	0	0	1	0	0	0	0	0	0	0	0	0	0	0	0	0	0	0	0	0	0	0	0	0	0	0	0	2	0	1	3	0	0	0	0	0	0	0	0	0	0	0	0	0	0	0	0	0
k__Bacteria;p__Actinobacteria;c__Actinobacteria;o__Streptomycetales;f__Streptomycetaceae;g__Streptomyces;s__Streptomyces_qinzhouensis	1	0	0	0	0	0	0	0	0	0	0	0	0	0	0	0	0	0	0	0	0	0	0	0	0	0	5.637	2	0	3	0	0	0	0	0	0	0	0	0	0	0	0	0	0	0	0	0	0
k__Bacteria;p__Actinobacteria;c__Actinobacteria;o__Streptomycetales;f__Streptomycetaceae;g__Streptomyces;s__Streptomyces_sp._MH60	242.767	219.945	290.969	329.508	258.033	246.9	235.32	273.269	262.624	271.518	277.145	298.366	324.673	332.664	249.134	368.323	224.784	224.837	309.99	361.127	288.116	330.337	224.156	338.807	294.162	247.042	288.401	315.773	277.057	313.484	282.097	299.776	354.075	259.331	289.409	224.416	230.6	181.916	298.391	190.252	246.454	171.541	286.22	272.038	247.824	274.201	249.978	245.198
k__Bacteria;p__Actinobacteria;c__Actinobacteria;o__Streptomycetales;f__Streptomycetaceae;g__Streptomyces;s__Streptomyces_sp._NEAU-H3	0	2.767	2	0	0	4	0	1.957	0	0	9.55	4.151	3.667	2.697	0	0	4.627	7.635	4.267	10.363	0	0	0	6	6.772	1.685	2	3.419	0	3.527	5.166	0	2.74	4.677	0	0	1.957	1	0	1.095	5.699	0	0	0	0	0	3.003	0
k__Bacteria;p__Actinobacteria;c__Actinobacteria;o__Streptomycetales;f__Streptomycetaceae;g__Streptomyces;s__Streptomyces_sp._NRRL_F-5135	0	0	0	0	0	0	0	0	0	0	0	0	0	0	0	0	0	0	0	0	0	0	0	0	1	0	4	0	2	0	1	0	0	0	0	0	0	0	0	0	0	0	0	0	0	0	0	0
k__Bacteria;p__Actinobacteria;c__Actinobacteria;o__Streptomycetales;f__Streptomycetaceae;g__Streptomyces;s__Streptomyces_sp._PT12	0	0	0	0	0	3	0	1	0	0	0	0	1	0	0	0	0	3	0	0	0	0	0	0	0	3	0	0	0	1	0	0	1	0	0	0	1	0	0	1	0	0	2	0	0	0	0	0
k__Bacteria;p__Actinobacteria;c__Actinobacteria;o__Streptomycetales;f__Streptomycetaceae;g__Streptomyces;s__Streptomyces_sp._S-2	0	4	0	0	0	0	0	0	0	0	0	0	0	0	0	0	0	0	0	0	0	0	0	0	0	0	0	0	0	0	0	0	0	0	0	0	0	0	0	0	0	0	0	0	0	0	0	0
k__Bacteria;p__Actinobacteria;c__Actinobacteria;o__Streptomycetales;f__Streptomycetaceae;g__Streptomyces;s__Streptomyces_sp._SID13031	3	0	0	0	0	0	0	0	0	0	0	0	0	0	0	0	0	0	0	0	0	0	0	0	0	0	0	0	0	0	0	0	0	0	0	0	0	0	0	0	0	0	0	0	0	0	0	0
k__Bacteria;p__Actinobacteria;c__Actinobacteria;o__Streptomycetales;f__Streptomycetaceae;g__Streptomyces;s__Streptomyces_sp._WAC_01420	0	0	0	1	1	0	0	0	0	0	0	2	0	0	0	1	0	0	3	0	0	0	1	0	0	0	1	0	0	0	1	0	1	1	4	0	0	0	0	1	0	0	2	0	0	0	0	2
k__Bacteria;p__Actinobacteria;c__Actinobacteria;o__Streptomycetales;f__Streptomycetaceae;g__Streptomyces;s__Streptomyces_sp._alain-838	909.926	683.981	919.477	1159.96	858.392	771.009	872.638	711.933	968.008	838.13	903.927	1035.96	948.101	1051.77	697.053	1064.04	700.389	807.022	962.848	1133.56	895.95	1044.9	683.58	1053.1	1001.32	757.061	1025.52	1095.97	822.25	1189.82	845.762	1100.14	1167.82	845.428	861.67	803.124	737.618	580.506	856.946	558.035	816.838	559.926	998.359	986.329	755.082	810.719	852.527	958.993
k__Bacteria;p__Actinobacteria;c__Actinobacteria;o__Streptomycetales;f__Streptomycetaceae;g__Streptomyces;s__Streptomyces_vinaceus	40	0	41.087	0	0	5	0	0	0	1	0	0	0	1	1	0	0	0	0	0	0	0	1	1	126.049	0	116.898	73.292	62.482	75.395	98.22	0	0	0	0	0	0	0	0	0	0	0	1	0	0	0	0	0
k__Bacteria;p__Actinobacteria;c__Actinobacteria;o__Streptosporangiales;f__Nocardiopsaceae;g__Nocardiopsis;s__Nocardiopsis_chromatogenes	0	0	1	0	0	0	0	0	0	0	0	0	0	0	0	0	0	0	0	0	0	0	0	0	5	0	2	1	3	4	5	0	0	0	0	0	0	0	0	0	0	0	0	0	0	0	0	0
k__Bacteria;p__Actinobacteria;c__Actinobacteria;o__Streptosporangiales;f__Streptosporangiaceae;g__Nonomuraea;s__Nonomuraea_coxensis	1	0	1	0	0	0	0	0	0	0	0	0	0	0	0	0	0	0	0	0	0	0	0	0	4	0	3.109	5	1	3	1	0	0	0	0	0	0	0	0	0	0	0	0	0	0	0	0	0
k__Bacteria;p__Actinobacteria;c__Actinobacteria;o__Streptosporangiales;f__Streptosporangiaceae;g__Nonomuraea;s__Nonomuraea_jiangxiensis	2.408	0	8.007	0	0	0	0	0	0	0	0	0	0	0	0	0	0	0	0	0	0	0	0	0	0	0	3.183	0	3.61	0	0.559	0	0	0	0	0	0	0	0	0	0	0	0	0	0	0	0	0
k__Bacteria;p__Actinobacteria;c__Actinobacteria;o__Streptosporangiales;f__Thermomonosporaceae;g__Actinomadura;s__Actinomadura_sp._DSM_109109	4	0	3	1	2	1	1	1	0	0	2	0	0	1	1	0	0	2	1	1	1	3	0	1	0	1	1	0	1	0	0	2	3	1	1.479	2	0	0	3	0	0	3	1.236	2	2	2	0	2
k__Bacteria;p__Actinobacteria;c__Actinobacteria;o__unclassified;f__unclassified;g__unclassified;s__Actinobacteria_bacterium	13	5	21	0	5	1	0	0	1	0	0	0	0	0	3	1	0	2	0	0	4	1	0	1	48	0	46	32	23	47	30	0	1	1	0	0	0	0	0	0	0	0	0	1	0	0	0	0
k__Bacteria;p__Actinobacteria;c__Coriobacteriia;o__Coriobacteriales;f__Atopobiaceae;g__Atopobium;s__Atopobium_minutum	0	0	2	0	0	0	0	0	0	0	0	0	0	0	2	0	0	0	0	0	24	0	0	0	16	0	2	0	0	0	0	0	0	0	0	0	0	0	0	0	0	0	0	0	0	0	0	0
k__Bacteria;p__Actinobacteria;c__Coriobacteriia;o__Coriobacteriales;f__Coriobacteriaceae;g__Collinsella;s__Collinsella_aerofaciens	0	0	0	0	0	0	0	0	0	0	0	8	0	0	1	0	0	1	0	0	28	0	0	75	22	0	0	0	0	0	0	0	0	0	0	0	0	0	0	0	0	0	0	0	11.121	0	0	0
k__Bacteria;p__Actinobacteria;c__Coriobacteriia;o__Coriobacteriales;f__Coriobacteriaceae;g__Collinsella;s__Collinsella_sp._AF33-16	0	0	0	0	0	0	0	0	0	0	0	0	0	0	0	0	0	0	0	0	0	0	0	0	0	0	0	0	0	0	0	0	0	0	0	0	0	0	0	0	0	0	0	0	6	0	0	0
k__Bacteria;p__Actinobacteria;c__Coriobacteriia;o__Coriobacteriales;f__Coriobacteriaceae;g__unclassified;s__Coriobacteriaceae_bacterium_BV3Ac1	1	168	1	0	1	0	1	0	3	0	0	1	83	3	1	0	0	0	0	11	9	2	0	151	22	2	160	0	38	3	7	0	0	12	0	0	2	163	94	0	34	1	38	0	0	0	53	7
k__Bacteria;p__Actinobacteria;c__Coriobacteriia;o__Coriobacteriales;f__unclassified;g__unclassified;s__Coriobacteriales_bacterium_DNF00809	0	1	1	0	0	0	0	0	1	0	0	0	5	0	0	0	0	0	0	0	0	0	3	0	2	0	0	4	4	0	0	0	0	2	0	0	0	0	5	0	1	0	17.773	0	0	0	28.576	1
k__Bacteria;p__Actinobacteria;c__Coriobacteriia;o__Eggerthellales;f__Eggerthellaceae;g__Enterorhabdus;s__Enterorhabdus_sp._P55	0	0	0	0	0	0	0	0	0	0	0	0	0	0	0	0	0	0	0	0	0	0	0	0	0	0	0	0	0	0	0	0	0	3	2	0	1	0	0	0	0	0	0	0	0	0	0	0
k__Bacteria;p__Actinobacteria;c__Nitriliruptoria;o__Nitriliruptorales;f__Nitriliruptoraceae;g__unclassified;s__Nitriliruptoraceae_bacterium_ZYF776	622.062	7	651.909	11	14	9	28	13	13.107	19	25	14	13	18	17	22	9	11	29	18	10	14	16	17	1582.71	18	1704.52	1093.31	1015.63	1198.85	1316.68	17	21	28.284	27	16	31	11.58	18	8	5	20	14	17	29	9	8.624	11
k__Bacteria;p__Actinobacteria;c__Rubrobacteria;o__Rubrobacterales;f__Rubrobacteraceae;g__Rubrobacter;s__Rubrobacter_sp.	2	0	0	0	0	0	0	0	0	0	0	0	0	0	0	0	0	0	0	0	0	0	0	0	1	0	5	2	1	1	4.409	0	0	0	0	0	0	0	0	0	0	0	0	0	0	0	0	0
k__Bacteria;p__Actinobacteria;c__Rubrobacteria;o__Rubrobacterales;f__Rubrobacteraceae;g__unclassified;s__uncultured_Rubrobacteraceae_bacterium	0	0	0	0	0	0	0	3	0	0	0	0	0	0	0	0	0	0	0	0	0	0	0	0	0	0	0	0	0	0	0	0	0	0	0	0	0	0	0	0	0	0	0	0	0	0	0	0
k__Bacteria;p__Actinobacteria;c__unclassified;o__unclassified;f__unclassified;g__Candidatus_Hakubanella;s__Candidatus_Hakubanella_thermoalkaliphilus	0	0	3	3	0	2	7	0	0	0	1	0	2	1	0	2	5	1	0	0	2	4	3	0	2	0	3	0	0	0	1	1	4	0	2	0	2	0	3	2	0	2	0	1	0	1	1	0
k__Bacteria;p__Aquificae;c__Aquificae;o__Aquificales;f__Aquificaceae;g__Aquifex;s__Aquifex_sp.	2	3	4	12	2	2	13	4	2	9	2	3	5	7	3	2	3	4	1	2	0	7	8	1	5	2	7	3	0	3	5	9.752	10	4	2	6	8	3	4	2	9	7	7.553	6	4	3	1	11
k__Bacteria;p__Armatimonadetes;c__Chthonomonadetes;o__Chthonomonadales;f__unclassified;g__unclassified;s__Chthonomonadales_bacterium	0	0	3	0	0	0	0	0	0	0	0	0	0	0	0	0	0	0	0	0	0	0	0	0	1	0	5	1.785	1	0	0	0	0	0	0	0	0	0	0	0	0	0	0	0	0	0	0	0
k__Bacteria;p__Armatimonadetes;c__unclassified;o__unclassified;f__unclassified;g__unclassified;s__Armatimonadetes_bacterium	1	0	0	0	0	0	0	0	0	0	0	0	0	0	0	0	0	0	0	0	0	0	0	0	0	0	0	3	0	2	0	0	0	0	0	0	0	0	0	0	0	0	0	0	0	0	0	0
k__Bacteria;p__Bacteroidetes;c__Bacteroidia;o__Bacteroidales;f__Bacteroidaceae;g__Bacteroides;s__Bacteroides_clarus	0	0	0	0	0	0	0	0	0	0	0	0	0	0	0	0	4	0	0	0	0	0	0	0	4	0	0	0	0	0	0	0	0	0	0	0	0	0	0	0	0	0	0	0	0	0	0	0
k__Bacteria;p__Bacteroidetes;c__Bacteroidia;o__Bacteroidales;f__Bacteroidaceae;g__Bacteroides;s__Bacteroides_faecis	0	3	0	0	0	0	0	0	0	0	0	0	0	0	0	0	0	0	0	0	0	0	0	0	1	0	0	0	0	0	0	0	0	0	0	0	0	0	0	0	0	0	0	0	0	0	0	0
k__Bacteria;p__Bacteroidetes;c__Bacteroidia;o__Bacteroidales;f__Bacteroidaceae;g__Bacteroides;s__Bacteroides_fragilis	32.553	15.184	10.838	17.036	25.561	23.815	20.502	15.269	27.627	24.527	20.283	24.582	20.266	20.24	17.138	17.783	15.863	14.051	21.183	21.738	14.907	35.199	13.332	17.249	23.159	24.241	31.105	26.231	13.512	15.611	12.072	20.362	35.555	13.248	32.356	18.095	6.439	19.563	14.161	11.734	14.614	9.136	23.104	19.654	15.169	12.466	21.126	22.321
k__Bacteria;p__Bacteroidetes;c__Bacteroidia;o__Bacteroidales;f__Bacteroidaceae;g__Bacteroides;s__Bacteroides_sp._51	2	0	0	1	0	0	1	2	2	0	0	1	0	0	1	2	0	0	2	1	1	1	0	0	1	0	0	0	5	6	1	0	0	2	0	0	1	1	0	1	0	1	1	0	0	0	0	0
k__Bacteria;p__Bacteroidetes;c__Bacteroidia;o__Bacteroidales;f__Bacteroidaceae;g__Bacteroides;s__Bacteroides_sp._CAG:661	0	0	0	1	0	0	0	0	0	0	3	1	1	0	0	0	1	0	0	2	3	2	0	1	0	0	0	1	0	0	1	0	1	2	0	8	0	0	0	1	1	0	1	0	0	0	0	0
k__Bacteria;p__Bacteroidetes;c__Bacteroidia;o__Bacteroidales;f__Bacteroidaceae;g__Bacteroides;s__Bacteroides_sp._CF01-10NS	0	2	0	0	0	0	0	0	0	0	0	0	0	0	0	0	3	0	0	0	2	0	0	0	70.52	0	0	0	0	0	0	0	0	0	0	0	0	0	0	0	0	0	0	0	0	0	0	0
k__Bacteria;p__Bacteroidetes;c__Bacteroidia;o__Bacteroidales;f__Bacteroidaceae;g__Bacteroides;s__Bacteroides_xylanisolvens	0	0	0	0	0	0	0	0	0	0	0	0	0	0	0	0	0	0	0	0	7	0	0	0	0	0	1	0	0	0	0	0	0	0	0	0	0	0	0	0	0	0	0	0	0	0	0	0
k__Bacteria;p__Bacteroidetes;c__Bacteroidia;o__Bacteroidales;f__Bacteroidaceae;g__unclassified;s__Bacteroidaceae_bacterium	707.351	532.959	659.724	758.383	647.792	647.599	642.312	627.231	684.02	643.217	614.953	678.892	667.976	770.848	548.961	804.132	536.688	577.868	699.907	778.393	633.345	673.867	484.272	756.562	659.786	590.23	763.345	763.298	578.323	774.734	554.069	750.384	757.06	517.333	580.825	494.361	494.776	440.737	577.828	434.604	530.176	429.587	730.079	696.217	564.641	572.69	553.249	648.99
k__Bacteria;p__Bacteroidetes;c__Bacteroidia;o__Bacteroidales;f__Dysgonomonadaceae;g__Dysgonomonas;s__Dysgonomonas_sp._216	2	1	7	2	5	5	2	9	8	9	3	4	6	7	4	5	4	4	11	7	2	8	9	4	5	8	2	10	3	2	2	7	9	10	5	6	5	2	1	3	4	4	3	9	1	7	2	4
k__Bacteria;p__Bacteroidetes;c__Bacteroidia;o__Bacteroidales;f__Muribaculaceae;g__unclassified;s__Muribaculaceae_bacterium	82.264	62.831	77.605	83.125	82.098	84.739	81.174	80.072	81.534	72.875	63.567	76.314	96.012	84.523	68.949	91.36	70.686	80.981	70.94	99.304	95.767	82.523	49.949	68.965	77.563	76.307	71.874	75.888	59.451	78.664	54	92.548	99.24	76.741	75.606	45.146	46.69	58.263	80.218	45.276	69.233	50.703	94.217	72.29	60.531	66.088	82.93	80.107
k__Bacteria;p__Bacteroidetes;c__Bacteroidia;o__Bacteroidales;f__Paludibacteraceae;g__Paludibacter;s__Paludibacter_sp.	0	0	0	0	0	0	0	0	0	0	0	0	0	0	0	0	0	0	0	0	0	0	0	0	0	0	0	0	0	0	0	3	2	21.845	16	27	5	0	0	0	0	0	0	0	0	0	0	0
k__Bacteria;p__Bacteroidetes;c__Bacteroidia;o__Bacteroidales;f__Porphyromonadaceae;g__Porphyromonas;s__Porphyromonas_gingivalis	5617.33	6019.62	4975.23	5685.06	5997.45	6377.64	8777.95	3799.76	10107.5	8234.37	6522.23	16333.9	6268.97	6449.3	4186.75	6995.95	4864.82	3265.78	10411.7	4468.88	9097.83	8449.29	3707.06	6039.91	5800.42	3657.57	7201.57	6875.41	11763.6	7459.04	4972.89	11082.1	9489.71	7888.29	4074.51	4793.39	4373.68	5456.89	4456.03	5169.1	3932.44	7990.09	8181.6	5437.05	6000.09	5117.83	6891.88	5215.05
k__Bacteria;p__Bacteroidetes;c__Bacteroidia;o__Bacteroidales;f__Porphyromonadaceae;g__Porphyromonas;s__Porphyromonas_macacae	5	0	1	0	0	0	0	0	0	0	0	0	0	0	0	0	0	0	0	0	0	0	0	0	1	0	1	1	1	0	1	0	0	0	0	0	0	0	0	0	0	0	0	0	0	0	0	0
k__Bacteria;p__Bacteroidetes;c__Bacteroidia;o__Bacteroidales;f__Porphyromonadaceae;g__Sanguibacteroides;s__Sanguibacteroides_justesenii	63.13	77.377	80.869	75.481	67.176	67.732	90.493	69.068	77.765	59.025	114.396	112.615	84.8	113.545	67.801	114.448	60.376	82.377	111.928	86.136	117.092	106.405	59.017	103.216	91.391	82.362	98.164	101.466	127.835	82.837	72.327	124.294	136.41	72.302	71	72.573	60.132	90.24	71.109	55.025	73.392	50.419	88.572	98.156	58.074	51.583	68.615	79.267
k__Bacteria;p__Bacteroidetes;c__Bacteroidia;o__Bacteroidales;f__Prevotellaceae;g__Prevotella;s__Prevotella_bivia	0	77	4	0	0	1	0	0	0	0	0	12	0	0	0	0	219.348	0	0	0	0	0	0	0	645.679	0	0	3	0	1	1	0	0	0	1	0	0	0	0	0	0	0	0	0	0	0	0	5
k__Bacteria;p__Bacteroidetes;c__Bacteroidia;o__Bacteroidales;f__Prevotellaceae;g__Prevotella;s__Prevotella_buccalis	0	0	3	0	0	0	0	0	0	0	0	0	0	0	0	0	0	0	0	0	3	0	0	0	24.435	0	0	0	0	1	0	0	0	0	0	0	0	0	0	0	0	0	0	0	0	0	0	0
k__Bacteria;p__Bacteroidetes;c__Bacteroidia;o__Bacteroidales;f__Prevotellaceae;g__Prevotella;s__Prevotella_copri	0	0	0	0	0	0	0	0	0	0	0	0	0	0	3	0	0	0	0	0	0	0	0	0	0	0	0	0	0	0	0	0	0	0	0	0	0	0	0	0	0	0	0	0	0	0	0	0
k__Bacteria;p__Bacteroidetes;c__Bacteroidia;o__Bacteroidales;f__Prevotellaceae;g__Prevotella;s__Prevotella_corporis	0	3	0	0	0	0	0	0	0	0	0	0	0	0	0	0	0	0	0	0	0	0	0	0	0	0	0	0	0	0	0	0	0	0	0	0	0	0	0	0	0	0	0	0	0	0	0	0
k__Bacteria;p__Bacteroidetes;c__Bacteroidia;o__Bacteroidales;f__Prevotellaceae;g__Prevotella;s__Prevotella_disiens	0	3	0	0	0	0	0	0	0	0	0	0	0	0	0	0	5	0	0	0	0	0	0	0	7	0	0	0	0	0	0	0	0	0	0	0	0	0	0	0	0	0	0	0	0	0	0	0
k__Bacteria;p__Bacteroidetes;c__Bacteroidia;o__Bacteroidales;f__Prevotellaceae;g__Prevotella;s__Prevotella_intermedia	0	0	0	0	0	0	0	0	0	0	0	0	0	0	0	0	8	0	0	0	3	0	0	0	0	0	0	0	0	0	0	0	0	0	0	0	0	0	0	0	0	0	0	0	0	0	0	0
k__Bacteria;p__Bacteroidetes;c__Bacteroidia;o__Bacteroidales;f__Prevotellaceae;g__Prevotella;s__Prevotella_sp.	0	0	0	0	0	0	0	0	0	0	0	0	0	0	0	0	3	0	0	0	0	0	0	0	2.406	0	0	0	0	0	0	0	0	0	0	0	0	0	0	0	0	0	0	0	0	0	0	0
k__Bacteria;p__Bacteroidetes;c__Bacteroidia;o__Bacteroidales;f__Prevotellaceae;g__Prevotella;s__Prevotella_sp._CAG:755	0	2	0	0	0	0	0	0	0	2	0	1	0	0	0	0	1	0	0	3	0	2	0	1	0	0	0	0	2	0	2	4	0	0	0	0	0	0	0	0	2	7	1	0	0	1	3	1
k__Bacteria;p__Bacteroidetes;c__Bacteroidia;o__Bacteroidales;f__Prevotellaceae;g__Prevotella;s__Prevotella_timonensis	0	0	0	0	0	0	0	0	0	0	0	0	0	0	0	3	10	0	0	0	9	0	0	0	53	0	0	0	0	0	0	0	0	0	0	0	0	0	0	0	0	0	0	0	0	0	0	3
k__Bacteria;p__Bacteroidetes;c__Bacteroidia;o__Bacteroidales;f__Prevotellaceae;g__Prevotella;s__Prevotella_veroralis	0	0	0	0	0	0	0	0	0	0	0	0	0	0	0	0	4	0	0	0	0	0	0	0	6	0	0	0	0	0	0	0	0	0	0	0	0	0	0	0	0	0	0	0	0	0	0	0
k__Bacteria;p__Bacteroidetes;c__Bacteroidia;o__Bacteroidales;f__Rikenellaceae;g__Alistipes;s__Alistipes_sp.	0	1	2	0	0	0	0	0	1	0	0	0	1	0	0	0	0	0	0	1	0	2	1	3	0	2	1	3	2	1	0	0	0	1	0	3	1	1	1	0	0	1	0	1	0	0	3	0
k__Bacteria;p__Bacteroidetes;c__Bacteroidia;o__Bacteroidales;f__Tannerellaceae;g__Parabacteroides;s__Parabacteroides_sp._52	888.701	730.067	989.108	1122.72	930.2	959.523	958.795	835.529	1049.66	896.692	989.086	1103.23	1018.87	1177.47	782.759	1136.49	830.598	907.229	1066.24	1272.9	984.515	1215.53	776.571	1087.65	1003.81	988.933	1023.79	1026.41	931.583	1242.32	804.161	1071.7	1145.09	917.893	873.517	829.204	788.144	657.075	965.416	670.185	695.726	659.757	1077.7	1014.29	807.346	810.152	877.248	985.689
k__Bacteria;p__Bacteroidetes;c__Bacteroidia;o__Bacteroidales;f__Tenuifilaceae;g__Tenuifilum;s__Tenuifilum_thalassicum	0	0	0	0	1	5	0	0	0	0	0	0	1	2	0	0	0	0	0	1	0	1	0	0	0	2	3	0	2	2	3	2	0	0	1	0	0	0	0	0	0	0	0	0	0	0	1	0
k__Bacteria;p__Bacteroidetes;c__Bacteroidia;o__Bacteroidales;f__Williamwhitmaniaceae;g__Williamwhitmania;s__Williamwhitmania_taraxaci	0	1	0	0	0	0	0	0	0	0	0	0	0	0	0	0	0	0	0	0	0	0	3	0	0	0	0	0	0	0	0	0	0	0	0	0	0	0	0	0	0	0	0	0	0	0	1	0
k__Bacteria;p__Bacteroidetes;c__Bacteroidia;o__Bacteroidales;f__unclassified;g__unclassified;s__Bacteroidales_bacterium	8.262	13.25	15.237	16.398	11.699	12	2	5.944	7.723	13.594	12	10	7.182	22.748	12.377	25.48	8.394	6.65	5.813	14	6.377	12.844	7.077	11.558	18.503	12	22.389	14.717	11	24.345	6.745	10.519	8.009	27.623	14.394	7.366	10.086	8	13.9	8.941	7	14.414	5.448	22.373	11.344	13.489	14.161	9.459
k__Bacteria;p__Bacteroidetes;c__Bacteroidia;o__Marinilabiliales;f__Marinifilaceae;g__Marinifilum;s__Marinifilum_breve	0	0	1	0	0	0	0	0	0	0	0	0	0	0	0	0	0	0	0	0	0	0	0	0	7	0	12	9	7	9	5	0	0	0	0	0	0	0	0	0	0	0	0	0	0	0	0	0
k__Bacteria;p__Bacteroidetes;c__Bacteroidia;o__Marinilabiliales;f__Marinifilaceae;g__unclassified;s__Marinifilaceae_bacterium_T3-2_S1-C	28.537	21	37	24.199	26.471	25	26.275	16	31	24	23	32.26	34	36	23	43	20.978	26.644	19	41.835	26	30	27	23	23	26	32	29	17	28	29	40.007	35	17	35	28	26.311	18	23	14	17	12	24	28	12.964	17	27	24
k__Bacteria;p__Bacteroidetes;c__Bacteroidia;o__Marinilabiliales;f__Marinilabiliaceae;g__Labilibacter;s__Labilibacter_sediminis	0	0	0	0	0	0	0	0	0	0	0	0	0	0	0	0	0	0	0	0	0	0	0	0	0	0	0	0	0	0	0	0	0	15	20.415	0	0	0	0	0	0	0	0	0	0	0	0	0
k__Bacteria;p__Bacteroidetes;c__Bacteroidia;o__Marinilabiliales;f__Marinilabiliaceae;g__Saccharicrinis;s__Saccharicrinis_aurantiacus	1	0	0	0	0	0	0	0	0	0	0	0	0	0	0	0	0	0	0	0	0	0	0	0	7	0	9	0	5	6	1	0	0	0	0	0	0	0	0	0	0	0	0	0	0	0	0	0
k__Bacteria;p__Bacteroidetes;c__Bacteroidia;o__Marinilabiliales;f__Marinilabiliaceae;g__Saccharicrinis;s__Saccharicrinis_carchari	0	0	0	0	0	0	0	0	0	0	0	0	0	0	0	0	0	0	0	0	0	0	0	0	0	0	0	0	0	3	0	0	0	0	0	0	0	0	0	0	0	2	0	0	0	0	0	0
k__Bacteria;p__Bacteroidetes;c__Bacteroidia;o__Marinilabiliales;f__Marinilabiliaceae;g__unclassified;s__Marinilabiliaceae_bacterium_JC017	0	0	0	0	0	0	0	0	0	0	0	0	0	0	0	0	0	0	0	0	0	0	0	0	0	0	0	0	0	0	0	0	0	10	17.45	0	0	0	0	0	0	0	0	0	0	0	0	0
k__Bacteria;p__Bacteroidetes;c__Bacteroidia;o__Marinilabiliales;f__Prolixibacteraceae;g__Maribellus;s__Maribellus_luteus	8.461	9	10	6	6	20	9	8	12	12	17	12	12	8	14	10.437	7	15.693	19.786	13	11	14	13	13	25	4.406	25	5	13	8	17	16	13	12	7	7	9	15	18.084	7	9	5	10.803	21.999	9	10	7.111	5
k__Bacteria;p__Bacteroidetes;c__Bacteroidia;o__Marinilabiliales;f__Prolixibacteraceae;g__Sunxiuqinia;s__Sunxiuqinia_sp._RC1_OXG_1F	0	0	0	0	0	0	0	0	0	0	0	0	0	0	0	0	0	0	0	0	0	0	3	0	0	0	0	0	0	0	0	0	0	0	0	0	0	0	1	0	0	0	0	0	0	0	0	0
k__Bacteria;p__Bacteroidetes;c__Bacteroidia;o__Marinilabiliales;f__Prolixibacteraceae;g__unclassified;s__Prolixibacteraceae_bacterium	3	3	0	0	0	0	0	0	1	0	0	0	0	0	0	0	0	1	0	0	0	0	0	3	0	0	0	0	0	0	0	0	0	0	0	0	0	0	0	0	0	0	0	0	0	0	0	0
k__Bacteria;p__Bacteroidetes;c__Bacteroidia;o__unclassified;f__unclassified;g__unclassified;s__Bacteroidia_bacterium	0	5	0	0	0	1	0	0	0	0	0	0	0	0	0	0	1	0	0	3	0	0	0	0	0	0	0	0	0	0	0	0	0	0	0	0	0	0	0	0	0	0	0	0	0	0	0	0
k__Bacteria;p__Bacteroidetes;c__Chitinophagia;o__Chitinophagales;f__Chitinophagaceae;g__Asinibacterium;s__Asinibacterium_sp._OR53	0	13	0	1	5	4	0	3	3	0	0	6	0	0	3	0	1	0	2	0	0	0	0	3	1	0	0	0	0	0	0	0	0	0	0	3	0	0	1	3	0	0	5	0	0	0	0	0
k__Bacteria;p__Bacteroidetes;c__Chitinophagia;o__Chitinophagales;f__Chitinophagaceae;g__Chitinophaga;s__Chitinophaga_ginsengisoli	0	2	0	0	0	0	0	1	0	0	0	0	0	0	0	0	3	0	0	0	0	0	0	0	0	0	0	0	0	0	0	0	0	0	0	0	0	0	0	2	0	0	0	0	0	0	0	0
k__Bacteria;p__Bacteroidetes;c__Chitinophagia;o__Chitinophagales;f__Chitinophagaceae;g__Chitinophaga;s__Chitinophaga_rupis	0	0	1	0	0	0	0	0	0	0	0	0	0	0	0	0	0	0	0	0	0	0	0	0	0	0	3	0	3	0	2	0	0	0	0	0	0	0	0	0	0	0	0	0	0	0	0	0
k__Bacteria;p__Bacteroidetes;c__Chitinophagia;o__Chitinophagales;f__Chitinophagaceae;g__Chitinophaga;s__Chitinophaga_skermanii	0	3	0	1	0	0	0	3	0	0	0	0	0	0	0	0	0	0	0	0	0	0	0	0	0	0	0	0	0	0	0	0	0	0	0	0	0	0	2	0	0	0	0	0	0	2	0	0
k__Bacteria;p__Bacteroidetes;c__Chitinophagia;o__Chitinophagales;f__Chitinophagaceae;g__Chitinophaga;s__Chitinophaga_sp.	0	30.023	3	0	0	0	1	3	0	0	0	3	0	0	1	0	0	1	0	0	1	0	6	0	0	4	0	0	0	0	2	1	2	0	0	0	0	1	0	4	0	0	0	1	0	4	1	0
k__Bacteria;p__Bacteroidetes;c__Chitinophagia;o__Chitinophagales;f__Chitinophagaceae;g__Chitinophaga;s__Chitinophaga_sp._K20C18050901	0	0	0	0	0	0	0	1	0	1	0	1	0	0	3	0	0	0	0	0	0	0	0	0	0	0	0	0	0	0	0	0	0	0	0	0	0	0	0	0	0	0	0	0	0	0	0	0
k__Bacteria;p__Bacteroidetes;c__Chitinophagia;o__Chitinophagales;f__Chitinophagaceae;g__Chitinophaga;s__Chitinophaga_sp._SYP-B3965	0	4	0	0	0	0	0	0	0	0	0	0	0	0	0	0	0	0	0	0	0	0	0	0	0	0	0	0	0	0	0	0	0	0	0	0	0	0	0	0	0	0	0	0	0	0	0	0
k__Bacteria;p__Bacteroidetes;c__Chitinophagia;o__Chitinophagales;f__Chitinophagaceae;g__Chitinophaga;s__Chitinophaga_sp._YR573	0	0	0	0	1	0	0	0	3	0	0	0	0	0	0	0	0	0	0	0	0	0	1	0	0	0	0	0	0	0	0	0	0	0	0	0	0	0	1	0	0	0	0	0	0	0	0	0
k__Bacteria;p__Bacteroidetes;c__Chitinophagia;o__Chitinophagales;f__Chitinophagaceae;g__Chitinophaga;s__Chitinophaga_sp._YR627	1	0	0	0	0	0	0	0	0	0	0	0	0	0	1	0	0	0	0	3	0	0	0	0	0	1	0	0	0	0	0	0	0	0	0	0	0	0	0	0	0	0	0	0	0	0	0	0
k__Bacteria;p__Bacteroidetes;c__Chitinophagia;o__Chitinophagales;f__Chitinophagaceae;g__Chitinophaga;s__Chitinophaga_sp._ysch24	4	1	0	2	0	1	2	4	3	3	1	0	1	1	1	0	3	1	2	1	1	0	5	3	1	2	2	5	0	4	3	6	4	0	1	4	1	2	0	1	5	0	1	3	5	0	2	0
k__Bacteria;p__Bacteroidetes;c__Chitinophagia;o__Chitinophagales;f__Chitinophagaceae;g__Cnuella;s__Cnuella_takakiae	0	0	0	2	0	2	0	0	0	0	3	0	0	0	0	0	0	0	0	0	0	0	8	0	0	1	0	0	0	0	0	0	0	0	0	0	0	0	0	0	0	0	0	0	0	0	0	0
k__Bacteria;p__Bacteroidetes;c__Chitinophagia;o__Chitinophagales;f__Chitinophagaceae;g__Ferruginibacter;s__Ferruginibacter_sp.	0	0	0	0	0	0	0	0	0	0	0	0	0	0	0	0	0	0	0	0	0	0	0	3	0	0	0	0	0	0	0	0	0	0	0	0	0	0	1	1	0	0	0	0	0	0	0	0
k__Bacteria;p__Bacteroidetes;c__Chitinophagia;o__Chitinophagales;f__Chitinophagaceae;g__Flaviaesturariibacter;s__Flaviaesturariibacter_sp._17J68-12	3	0	0	0	0	0	0	0	0	0	0	0	0	0	0	0	0	0	0	0	0	0	0	0	0	0	0	0	0	0	0	0	0	0	0	0	0	0	0	0	0	0	0	0	0	0	0	0
k__Bacteria;p__Bacteroidetes;c__Chitinophagia;o__Chitinophagales;f__Chitinophagaceae;g__Flavihumibacter;s__Flavihumibacter_sp._ZG627	2	0	0	0	0	0	0	3	0	0	0	0	0	0	0	0	0	0	0	0	0	0	0	0	0	0	0	0	0	0	0	0	0	0	0	0	0	0	0	0	0	0	0	0	0	0	0	0
k__Bacteria;p__Bacteroidetes;c__Chitinophagia;o__Chitinophagales;f__Chitinophagaceae;g__Flavisolibacter;s__Flavisolibacter_sp._BT320	0	4	0	0	0	2	0	0	0	0	0	0	0	0	0	0	0	0	0	0	0	0	0	0	0	0	0	0	0	0	0	0	0	0	0	0	0	0	0	0	0	0	0	0	0	0	0	0
k__Bacteria;p__Bacteroidetes;c__Chitinophagia;o__Chitinophagales;f__Chitinophagaceae;g__Flavisolibacter;s__Flavisolibacter_tropicus	0	8	0	0	0	0	0	0	0	0	0	0	0	0	0	0	0	1	0	0	0	0	0	1	0	0	0	0	0	0	3	0	0	0	0	0	1	0	0	0	0	0	1	0	0	0	0	0
k__Bacteria;p__Bacteroidetes;c__Chitinophagia;o__Chitinophagales;f__Chitinophagaceae;g__Hydrobacter;s__Hydrobacter_penzbergensis	0	7	0	0	4	0	0	0	0	0	0	0	0	0	3	0	0	0	1	0	0	0	0	0	0	0	0	0	0	0	0	0	0	0	0	0	0	0	0	0	1	0	0	1	0	0	0	0
k__Bacteria;p__Bacteroidetes;c__Chitinophagia;o__Chitinophagales;f__Chitinophagaceae;g__Hydrotalea;s__Hydrotalea_flava	0	4	0	1	0	2	0	0	0	0	0	0	0	0	0	1	0	1	4	0	0	0	0	4	0	1	0	0	2	0	1	0	0	0	0	0	0	0	3	3	0	0	0	1	1	0	2	0
k__Bacteria;p__Bacteroidetes;c__Chitinophagia;o__Chitinophagales;f__Chitinophagaceae;g__Panacibacter;s__Panacibacter_ginsenosidivorans	0	0	0	0	0	0	0	3	0	0	0	0	0	0	0	0	0	0	0	0	0	0	0	0	0	0	0	0	0	0	1	0	0	0	0	0	0	0	3	0	0	0	0	0	0	0	0	0
k__Bacteria;p__Bacteroidetes;c__Chitinophagia;o__Chitinophagales;f__Chitinophagaceae;g__Panacibacter;s__Panacibacter_sp._KCS-6	0	0	0	0	0	0	0	0	0	0	0	6	0	0	0	0	0	0	0	0	0	0	0	0	0	0	0	0	0	0	0	0	0	0	0	0	0	0	0	0	0	0	0	0	0	0	0	0
k__Bacteria;p__Bacteroidetes;c__Chitinophagia;o__Chitinophagales;f__Chitinophagaceae;g__Sediminibacterium;s__Sediminibacterium_ginsengisoli	3	10	0	1	3	0	0	6	0	0	0	1	0	0	1	0	0	6	2	1	0	0	3	0	0	0	0	0	0	1	7	0	1	0	0	0	0	0	0	1	1	0	2	0	0	2	0	0
k__Bacteria;p__Bacteroidetes;c__Chitinophagia;o__Chitinophagales;f__Chitinophagaceae;g__Sediminibacterium;s__Sediminibacterium_goheungense	0	17	0	0	0	0	0	9	0	0	0	1	1	1	1	0	1	9	0	6	3	0	2	0	0	6	0	0	0	0	4	0	0	0	0	0	0	0	4	0	0	0	0	0	3	0	0	0
k__Bacteria;p__Bacteroidetes;c__Chitinophagia;o__Chitinophagales;f__Chitinophagaceae;g__Sediminibacterium;s__Sediminibacterium_magnilacihabitans	0	3	0	0	0	0	0	1	0	1	1	0	4	0	0	0	0	0	0	0	0	0	3	0	0	0	0	0	0	0	0	0	0	0	0	0	2	0	1	0	0	0	0	1	0	0	0	0
k__Bacteria;p__Bacteroidetes;c__Chitinophagia;o__Chitinophagales;f__Chitinophagaceae;g__Sediminibacterium;s__Sediminibacterium_roseum	6	13	0	6	0	4	0	4	0	0	0	0	0	0	6.014	0	0	2	0	0	0	1	0	8	0	3	1	0	0	0	2	0	0	0	0	0	0	0	6	1	0	0	0	0	0	0	0	0
k__Bacteria;p__Bacteroidetes;c__Chitinophagia;o__Chitinophagales;f__Chitinophagaceae;g__Sediminibacterium;s__Sediminibacterium_salmoneum	0	27	0	0	2	3	0	4	0	3	1	0	0	0	3	0	0	6	8	0	0	0	6	0	1	5	1	0	3	0	5	2	0	0	0	0	0	0	12	1	0	0	1	0	0	1	0	0
k__Bacteria;p__Bacteroidetes;c__Chitinophagia;o__Chitinophagales;f__Chitinophagaceae;g__Sediminibacterium;s__Sediminibacterium_sp._C3	7	14	0	0	1	0	0	2	1	1	1	2	0	0	2	0	1	5	0	1	0	0	8	8	0	9	0	0	0	0	2	1	0	0	0	0	0	1	2	0	0	0	4	0	1	1	0	0
k__Bacteria;p__Bacteroidetes;c__Chitinophagia;o__Chitinophagales;f__Chitinophagaceae;g__Sediminibacterium;s__Sediminibacterium_sp._FEMGT703S	5	13	0	0	5	0	0	1	0	2	0	3	0	0	1	0	2	2	0	1	1	0	4	0	3	3	0	0	0	0	3	0	0	3	0	1	0	1	4	2	1	0	0	2	0	0	0	0
k__Bacteria;p__Bacteroidetes;c__Chitinophagia;o__Chitinophagales;f__Chitinophagaceae;g__Sediminibacterium;s__Sediminibacterium_sp._Gen4	0	17	0	5	0	1	1	3	1	1	1	0	3	0	3	0	0	4	0	0	0	0	5	3	0	1	0	0	0	0	1	0	3	0	0	0	0	0	3	1	0	1	0	0	0	0	0	3
k__Bacteria;p__Bacteroidetes;c__Chitinophagia;o__Chitinophagales;f__Chitinophagaceae;g__Sediminibacterium;s__Sediminibacterium_sp._WSJ-3	0	11	0	0	0	0	0	2	1	2	0	0	0	0	2	0	0	0	0	0	0	0	14	3	0	2	0	0	0	2	0	0	0	0	0	0	0	0	2	0	0	0	0	0	0	0	0	3
k__Bacteria;p__Bacteroidetes;c__Chitinophagia;o__Chitinophagales;f__Chitinophagaceae;g__Segetibacter;s__Segetibacter_aerophilus	0	0	0	1	0	0	0	0	0	0	0	0	0	0	0	0	0	0	0	0	3	0	0	0	0	0	0	0	0	0	0	0	0	0	0	0	0	0	0	0	0	0	0	0	0	0	0	0
k__Bacteria;p__Bacteroidetes;c__Chitinophagia;o__Chitinophagales;f__Chitinophagaceae;g__Segetibacter;s__Segetibacter_koreensis	0	4	0	0	0	0	0	0	0	0	0	0	0	0	0	0	0	0	0	0	0	0	0	0	0	0	0	0	0	0	1	0	0	0	0	0	0	0	0	0	0	0	0	0	2	0	0	0
k__Bacteria;p__Bacteroidetes;c__Chitinophagia;o__Chitinophagales;f__Chitinophagaceae;g__Segetibacter;s__Segetibacter_sp._3557_3	0	5	0	0	0.999	4	0	0	0	0	0	0	0	0	2	0	0	0	0	0	0	0	3	1	0	0	0	0	0	0	0	0	0	0	0	0	0	0	1	0	0	0	0	0	0	0	0	0
k__Bacteria;p__Bacteroidetes;c__Chitinophagia;o__Chitinophagales;f__Chitinophagaceae;g__Taibaiella;s__Taibaiella_soli	0	1	0	0	0	0	0	0	0	0	0	0	0	0	3	3	0	0	0	0	0	0	0	2	0	0	0	0	0	0	1	0	0	0	0	0	0	0	3	0	0	0	0	0	0	0	0	0
k__Bacteria;p__Bacteroidetes;c__Chitinophagia;o__Chitinophagales;f__Chitinophagaceae;g__Terrimonas;s__Terrimonas_sp._NS-102	0	5	1	0	0	0	0	2	0	0	0	0	0	0	0	0	0	0	0	0	0	0	2	0	0	0	0	0	0	0	2	0	0	0	0	0	0	0	3	0	0	0	0	0	0	0	0	0
k__Bacteria;p__Bacteroidetes;c__Chitinophagia;o__Chitinophagales;f__Chitinophagaceae;g__unclassified;s__Chitinophagaceae_bacterium	24	115.241	2	15	6	8	8	18	3	9	4	4	1	9	20	1	11	28	2	3	1	5	42	16	2	27	2	5	3	1	15	0	3	6	1	2	2	4	25	8	3	4	2	2	6	12	4	1
k__Bacteria;p__Bacteroidetes;c__Chitinophagia;o__Chitinophagales;f__Chitinophagaceae;g__unclassified;s__Chitinophagaceae_bacterium_BSSC1	0	14	0	1	0	2	1	3	0	0	0	0	0	0	1	0	0	0	0	4	0	1	5	2	0	0	0	0	0	0	1	0	0	0	4	0	0	0	2	0	0	0	0	0	0	0	2	0
k__Bacteria;p__Bacteroidetes;c__Chitinophagia;o__Chitinophagales;f__Chitinophagaceae;g__unclassified;s__Chitinophagaceae_bacterium_IBVUCB2	0	0	0	0	0	0	0	0	0	0	0	0	0	0	0	0	0	1	0	0	0	0	0	1	0	1	0	3	0	0	1	0	0	0	0	0	0	0	0	0	0	0	0	0	0	0	0	0
k__Bacteria;p__Bacteroidetes;c__Chitinophagia;o__Chitinophagales;f__Chitinophagaceae;g__unclassified;s__Chitinophagaceae_bacterium_PMP191F	0	1	0	0	0	1	0	0	0	0	0	3	0	0	0	0	0	1	0	0	0	0	0	0	0	0	0	1	0	0	0	0	0	0	0	0	0	0	0	0	0	0	0	0	0	0	0	0
k__Bacteria;p__Bacteroidetes;c__Chitinophagia;o__Chitinophagales;f__Chitinophagaceae;g__unclassified;s__Chitinophagaceae_bacterium_YG09	4	0	0	0	0	0	0	0	0	0	0	0	0	0	0	0	0	0	0	0	0	0	0	0	3.611	0	4.05	3	0	2	0	0	0	0	0	0	0	0	0	0	0	0	0	0	0	0	0	0
k__Bacteria;p__Bacteroidetes;c__Chitinophagia;o__Chitinophagales;f__unclassified;g__unclassified;s__Chitinophagales_bacterium	0	0	0	0	0	0	0	0	2	0	0	0	0	0	3	0	0	0	0	0	0	0	0	0	0	0	0	1	0	3	0	0	0	0	0	0	0	0	0	0	0	0	0	0	0	0	0	0
k__Bacteria;p__Bacteroidetes;c__Chitinophagia;o__unclassified;f__unclassified;g__unclassified;s__Chitinophagia_bacterium	0	17	1	2	0	2	0	5	0	0	0	4	0	0	4	1	0	8	0	1	0	0	6	2	1	0	1	0	0	0	0	0	1	0	0	0	0	1	1	0	0	0	0	0	0	0	0	0
k__Bacteria;p__Bacteroidetes;c__Cytophagia;o__Cytophagales;f__Bernardetiaceae;g__Hugenholtzia;s__Hugenholtzia_roseola	1	0	0	1	0	3	0	0	0	0	0	0	0	0	0	0	0	1	0	0	0	0	0	0	1	0	4	1	1	3	3	0	0	0	0	0	0	0	0	0	0	0	3	0	0	0	4	0
k__Bacteria;p__Bacteroidetes;c__Cytophagia;o__Cytophagales;f__Cesiribacteraceae;g__Nafulsella;s__Nafulsella_turpanensis	0	0	0	0	0	0	0	0	0	0	0	0	0	0	0	0	0	0	0	0	0	0	0	0	0	0	0	1	0	0	3	0	0	0	0	0	0	0	0	0	0	0	0	0	0	0	0	0
k__Bacteria;p__Bacteroidetes;c__Cytophagia;o__Cytophagales;f__Cyclobacteriaceae;g__Algoriphagus;s__Algoriphagus_ornithinivorans	0	1	0	0	0	0	0	0	0	0	0	0	0	0	0	0	0	0	4	0	0	0	0	0	0	1	0	0	0	0	0	0	0	0	0	0	0	0	2	0	0	0	0	0	0	0	0	0
k__Bacteria;p__Bacteroidetes;c__Cytophagia;o__Cytophagales;f__Cyclobacteriaceae;g__Algoriphagus;s__Algoriphagus_sp._A40	0	1	0	0	0	0	0	4	0	0	0	0	0	0	0	0	0	1	0	0	0	0	0	0	0	0	0	0	0	0	0	0	0	0	0	0	0	0	0	0	0	0	0	0	0	0	0	0
k__Bacteria;p__Bacteroidetes;c__Cytophagia;o__Cytophagales;f__Cyclobacteriaceae;g__Cecembia;s__Cecembia_lonarensis	0	4	0	0	0	0	0	0	0	0	0	0	0	0	1	0	0	2	0	0	0	0	0	0	0	0	0	0	0	0	0	0	0	0	0	0	0	0	0	0	0	0	0	0	0	0	0	0
k__Bacteria;p__Bacteroidetes;c__Cytophagia;o__Cytophagales;f__Cyclobacteriaceae;g__Cyclobacterium;s__Cyclobacterium_jeungdonense	79.023	40.289	66.155	72.572	63.185	62.56	72.56	40.51	67.935	62.209	63.647	73.859	61.964	74.769	43.262	59.96	45.81	62	75.859	92.374	84.26	76	49.403	65.771	67.086	57.237	61.344	79.933	60.063	74.886	57.478	97.158	62.24	42	59.874	41.357	65.356	41	66.405	41.624	44.658	38.591	61.745	52.023	52.018	43.54	56.326	69.168
k__Bacteria;p__Bacteroidetes;c__Cytophagia;o__Cytophagales;f__Cyclobacteriaceae;g__unclassified;s__Cyclobacteriaceae_bacterium_YHN15	5	2	2	3	5	6	3	4	4	2	2	1	3	2	3.407	2	5	3	4	1	2	3	5	6	2.264	5	6	7	1	1	1	4	4	4	3	3	1	4	6	1	1	6	10	8	2	3	3	4
k__Bacteria;p__Bacteroidetes;c__Cytophagia;o__Cytophagales;f__Cytophagaceae;g__Arcicella;s__Arcicella_aurantiaca	1	0	1	0	0	0	0	0	0	0	0	0	0	0	0	0	0	0	0	0	0	0	0	0	2	0	1	2	2	4	1	0	0	0	0	0	0	0	0	0	0	0	0	0	0	0	0	0
k__Bacteria;p__Bacteroidetes;c__Cytophagia;o__Cytophagales;f__Cytophagaceae;g__Arcicella;s__Arcicella_rosea	0	0	0	3	1	2	0	0	0	0	0	0	0	0	5	1	0	0	0	0	0	1	0	0	0	0	0	0	0	1	0	0	0	1	0	0	0	1	0	0	0	0	2	0	0	2	1	0
k__Bacteria;p__Bacteroidetes;c__Cytophagia;o__Cytophagales;f__Cytophagaceae;g__Cytophaga;s__Cytophaga_sp.	0	0	0	0	0	0	0	4	0	0	0	0	0	0	0	0	0	0	0	0	0	0	0	0	0	0	0	0	0	0	0	0	0	0	0	0	0	0	0	0	0	0	0	0	0	0	0	0
k__Bacteria;p__Bacteroidetes;c__Cytophagia;o__Cytophagales;f__Cytophagaceae;g__Dyadobacter;s__Dyadobacter_frigoris	2	4	0	0	0	0	0	0	0	0	0	0	0	0	0	0	0	0	0	0	0	0	2	0	0	0	0	0	0	0	0	0	0	0	0	0	0	0	0	0	0	0	0	0	0	0	0	0
k__Bacteria;p__Bacteroidetes;c__Cytophagia;o__Cytophagales;f__Cytophagaceae;g__Dyadobacter;s__Dyadobacter_jiangsuensis	0	0	1	0	0	0	0	0	0	0	0	0	0	0	0	0	0	0	0	0	0	0	0	0	1	0	1	0	0	0	4	0	0	0	0	0	0	0	0	0	0	0	0	0	0	0	0	0
k__Bacteria;p__Bacteroidetes;c__Cytophagia;o__Cytophagales;f__Cytophagaceae;g__Dyadobacter;s__Dyadobacter_psychrotolerans	0	6	0	1	0	0	1	0	0	0	1	0	0	0	0	0	0	0	0	0	0	0	0	0	0	0	0	0	0	0	0	0	0	0	0	0	0	0	0	0	0	0	0	0	0	0	1	0
k__Bacteria;p__Bacteroidetes;c__Cytophagia;o__Cytophagales;f__Cytophagaceae;g__Dyadobacter;s__Dyadobacter_soli	0	3	0	3	0	1	0	0	0	0	0	1	0	0	0	0	0	0	0	0	0	0	0	0	0	0	0	0	0	0	1	0	0	0	0	0	0	0	0	0	0	0	0	0	0	0	0	0
k__Bacteria;p__Bacteroidetes;c__Cytophagia;o__Cytophagales;f__Cytophagaceae;g__Larkinella;s__Larkinella_terrae	0	4	0	0	0	0	0	0	0	0	0	0	0	0	0	0	0	0	0	0	0	0	0	0	0	0	0	0	0	0	0	0	0	0	0	0	0	0	0	0	0	0	0	0	0	0	0	0
k__Bacteria;p__Bacteroidetes;c__Cytophagia;o__Cytophagales;f__Cytophagaceae;g__Rhodocytophaga;s__Rhodocytophaga_sp._172606-1	0	3	0	2	0	0	0	1	0	0	0	1	0	0	0	0	0	0	0	0	0	0	0	0	0	0	0	0	0	0	1	0	0	0	0	0	0	0	0	0	0	0	0	0	0	0	0	0
k__Bacteria;p__Bacteroidetes;c__Cytophagia;o__Cytophagales;f__Cytophagaceae;g__Runella;s__Runella_slithyformis	0	1	0	1	0	0	0	0	0	0	3	0	0	0	0	0	0	1	0	0	0	0	6	0	0	0	0	0	0	0	0	0	0	0	0	0	0	0	0	0	0	0	0	0	0	0	0	0
k__Bacteria;p__Bacteroidetes;c__Cytophagia;o__Cytophagales;f__Cytophagaceae;g__Spirosoma;s__Spirosoma_agri	0	0	0	0	0	0	0	0	0	0	0	0	0	0	0	0	0	3	0	0	0	0	0	0	0	0	0	0	0	0	1	0	0	0	0	0	0	0	3	0	0	0	0	0	0	0	0	0
k__Bacteria;p__Bacteroidetes;c__Cytophagia;o__Cytophagales;f__Cytophagaceae;g__Spirosoma;s__Spirosoma_panaciterrae	0	7	1	0	0	0	1	1	0	0	0	0	0	0	0	0	0	1	0	0	0	0	0	1	0	0	0	0	0	0	1	0	0	0	0	0	0	0	0	0	0	0	0	0	0	0	0	0
k__Bacteria;p__Bacteroidetes;c__Cytophagia;o__Cytophagales;f__Cytophagaceae;g__unclassified;s__Cytophagaceae_bacterium	0	0	0	0	0	0	1	0	0	0	1	0	0	2	0	0	1	0	0	0	0	0	0	0	0	0	3	0	0	0	2	0	0	2	1	1	1	2	1	1	0	0	0	0	1	0	0	0
k__Bacteria;p__Bacteroidetes;c__Cytophagia;o__Cytophagales;f__Flammeovirgaceae;g__Flammeovirga;s__Flammeovirga_sp._OC4	1	0	0	2	0	0	0	0	1	0	0	0	0	0	0	0	0	2	0	5	3	0	0	0	1	0	0	0	0	0	0	0	0	0	0	0	0	1	3	0	1	0	0	1	2	0	6	0
k__Bacteria;p__Bacteroidetes;c__Cytophagia;o__Cytophagales;f__Flammeovirgaceae;g__unclassified;s__Flammeovirgaceae_bacterium_311	0	3	0	0	0	0	0	0	0	0	0	0	0	0	0	0	0	0	0	0	0	0	0	0	0	0	0	0	0	0	0	0	0	0	0	0	0	0	1	0	0	0	0	0	0	0	0	0
k__Bacteria;p__Bacteroidetes;c__Cytophagia;o__Cytophagales;f__Fulvivirgaceae;g__Chryseolinea;s__Chryseolinea_serpens	0	0	0	0	0	0	0	0	0	0	0	0	0	0	0	0	0	0	0	0	3	0	0	0	0	0	0	0	0	0	0	0	0	0	0	0	0	0	0	0	0	0	0	0	0	0	0	0
k__Bacteria;p__Bacteroidetes;c__Cytophagia;o__Cytophagales;f__Fulvivirgaceae;g__Fulvivirga;s__Fulvivirga_imtechensis	0	0	1	1	0	0	0	0	0	0	0	0	0	0	0	0	0	0	0	0	0	0	0	0	0	0	5	1	2	1	2	0	0	0	0	0	0	0	0	0	0	0	0	0	0	0	0	0
k__Bacteria;p__Bacteroidetes;c__Cytophagia;o__Cytophagales;f__Hymenobacteraceae;g__Adhaeribacter;s__Adhaeribacter_sp._KUDC8001	0	0	0	0	0	0	0	0	0	0	0	0	0	0	0	0	0	0	0	0	0	0	0	0	0	0	3	0	0	0	1	0	0	0	0	0	0	0	0	0	0	0	0	0	0	0	0	0
k__Bacteria;p__Bacteroidetes;c__Cytophagia;o__Cytophagales;f__Hymenobacteraceae;g__Adhaeribacter;s__Adhaeribacter_sp._M2	1	0	0	0	0	0	0	0	0	0	0	3	0	0	0	0	0	1	1	0	0	1	0	0	0	0	0	2	1	0	2	2	1	0	0	0	0	0	0	0	5	0	0	0	2	0	0	0
k__Bacteria;p__Bacteroidetes;c__Cytophagia;o__Cytophagales;f__Hymenobacteraceae;g__Hymenobacter;s__Hymenobacter_mucosus	0	0	0	0	0	0	0	3	0	0	0	0	0	0	0	0	0	0	0	0	0	0	0	0	0	0	0	0	0	0	0	0	0	0	0	0	0	0	0	0	0	0	0	0	0	0	0	0
k__Bacteria;p__Bacteroidetes;c__Cytophagia;o__Cytophagales;f__Hymenobacteraceae;g__Hymenobacter;s__Hymenobacter_sedentarius	0	0	0	0	0	0	0	0	0	0	0	0	0	0	5	0	0	0	0	0	0	0	0	0	0	0	0	0	0	0	0	0	0	0	0	0	1	0	1	0	0	0	0	0	0	0	0	0
k__Bacteria;p__Bacteroidetes;c__Cytophagia;o__Cytophagales;f__Hymenobacteraceae;g__Hymenobacter;s__Hymenobacter_sediminis	0	4	0	0	0	0	0	0	0	0	0	0	0	0	0	0	0	0	0	0	2	0	0	0	0	0	0	0	0	0	0	0	0	0	0	0	0	0	0	0	0	0	0	0	0	0	0	0
k__Bacteria;p__Bacteroidetes;c__Cytophagia;o__Cytophagales;f__Hymenobacteraceae;g__Hymenobacter;s__Hymenobacter_sp.	1	0	2	0	0	0	0	0	0	0	0	0	0	0	0	0	0	0	0	0	0	0	0	0	4	0	4	0	1	0	2	0	0	0	0	0	0	0	0	0	0	0	0	0	0	0	0	0
k__Bacteria;p__Bacteroidetes;c__Cytophagia;o__Cytophagales;f__Marivirgaceae;g__Marivirga;s__Marivirga_lumbricoides	1	4	0	1	2	0	0	0	0	1	0	0	0	0	0	0	0	2	0	2	3	0	0	1	0	0	0	0	0	0	0	0	0	0	4	0	0	0	0	0	1	0	1	1	0	0	0	1
k__Bacteria;p__Bacteroidetes;c__Cytophagia;o__Cytophagales;f__Marivirgaceae;g__Marivirga;s__Marivirga_sp.	0	0	0	0	0	0	0	1	0	1	2	2	0	0	0	1	0	0	0	2	0	0	0	0	0	1	0	0	0	0	0	2	3	0	3	0	0	0	0	3	1	1	0	1	1	0	0	0
k__Bacteria;p__Bacteroidetes;c__Cytophagia;o__Cytophagales;f__Microscillaceae;g__Eisenibacter;s__Eisenibacter_elegans	0	0	1	0	1	4	0	1	0	1	0	0	0	0	1	0	0	0	0	0	1	0	0	0	0	0	0	1	0	0	2	2	0	0	3	0	0	0	0	0	0	0	0	0	0	0	0	0
k__Bacteria;p__Bacteroidetes;c__Cytophagia;o__Cytophagales;f__unclassified;g__unclassified;s__Cytophagales_bacterium	0	9	0	4	0	0	2	3	6	3	1	1	2	4	1	1	1	1	0	0	0	1	3	3	2	2	3	2	1	0	0	2	0	0	0	0	1	0	0	4	1	1	4	1	0	1	0	7
k__Bacteria;p__Bacteroidetes;c__Flavobacteriia;o__Flavobacteriales;f__Crocinitomicaceae;g__Crocinitomix;s__Crocinitomix_sp._SM1701	0	2	0	0	0	0	0	0	0	0	0	0	0	0	0	0	0	1	0	0	0	0	0	0	0	0	0	0	0	1	0	0	0	0	0	0	0	0	5	0	0	0	0	0	2	0	0	0
k__Bacteria;p__Bacteroidetes;c__Flavobacteriia;o__Flavobacteriales;f__Crocinitomicaceae;g__unclassified;s__Crocinitomicaceae_bacterium	7	0	5	0	0	0	0	0	0	0	0	0	0	0	0	0	0	0	0	0	0	0	0	0	1	0	5	3.685	0	2	2	0	0	0	0	0	0	0	0	0	0	0	0	0	0	0	0	0
k__Bacteria;p__Bacteroidetes;c__Flavobacteriia;o__Flavobacteriales;f__Flavobacteriaceae;g__Aequorivita;s__Aequorivita_lutea	447.48	338.139	487.328	435.811	337.483	416.71	515.042	334.423	314.935	976.435	281.441	653.866	403.803	581.819	357.007	267.037	470.332	282.868	616.032	431.571	503.486	382.656	416.484	502.306	543.826	369.869	415.867	376.509	332.238	591.185	453.771	566.609	398.939	218.38	339.431	276.524	435.786	213.651	351.998	312.885	263.101	286.57	520.754	430.675	299.256	278.106	257.446	292.631
k__Bacteria;p__Bacteroidetes;c__Flavobacteriia;o__Flavobacteriales;f__Flavobacteriaceae;g__Aequorivita;s__Aequorivita_sp._609	11	4	10	16	15	9	4	5	12.013	14	10	9	8	9	10	12	5	20	18	6	14	27.01	7	11	12	7	12	9	6	12	15	8	22	33	26	26	30	11	11	5	6	2	17	5	15	8	9	12
k__Bacteria;p__Bacteroidetes;c__Flavobacteriia;o__Flavobacteriales;f__Flavobacteriaceae;g__Aquimarina;s__Aquimarina_megaterium	1	0	0	0	0	0	0	0	0	0	0	0	0	0	0	0	0	0	0	0	0	0	0	0	2	0	3	0	0	1	1	0	0	0	0	0	0	0	0	0	0	0	0	0	0	0	0	0
k__Bacteria;p__Bacteroidetes;c__Flavobacteriia;o__Flavobacteriales;f__Flavobacteriaceae;g__Aquimarina;s__Aquimarina_spongiae	0	3	0	0	0	0	0	0	0	0	0	0	0	0	0	0	0	0	0	0	0	0	1	0	0	0	0	0	0	0	0	0	0	0	0	0	0	0	0	0	0	0	0	0	0	0	0	0
k__Bacteria;p__Bacteroidetes;c__Flavobacteriia;o__Flavobacteriales;f__Flavobacteriaceae;g__Flavobacterium;s__Flavobacterium_aquicola	0	2	0	0	0	1	0	0	0	0	0	0	1	0	0	0	0	4	0	0	1	0	0	0	0	0	0	0	0	0	0	0	0	0	0	0	0	0	0	0	1	0	1	0	0	0	0	0
k__Bacteria;p__Bacteroidetes;c__Flavobacteriia;o__Flavobacteriales;f__Flavobacteriaceae;g__Flavobacterium;s__Flavobacterium_aquidurense	0	3	0	0	0	0	0	0	0	0	0	0	0	0	0	0	1	0	0	0	0	0	0	0	0	0	0	0	0	0	0	0	0	0	0	0	0	0	0	0	0	0	0	0	0	0	0	0
k__Bacteria;p__Bacteroidetes;c__Flavobacteriia;o__Flavobacteriales;f__Flavobacteriaceae;g__Flavobacterium;s__Flavobacterium_johnsoniae	2	1	4	0	2	2	2	0	4	1	0	0	2	4	1	0	3	0	2	0	7	5	0	8	2	3	0	3	2	4	0	4	1	1	0	1	1	4	3	4	0	0	4	0	5	1	0	1
k__Bacteria;p__Bacteroidetes;c__Flavobacteriia;o__Flavobacteriales;f__Flavobacteriaceae;g__Flavobacterium;s__Flavobacterium_micromati	0	4	0	0	0	0	0	0	0	0	0	0	0	0	0	0	0	0	0	0	0	0	0	0	0	0	0	0	0	0	0	0	0	0	0	0	0	0	0	0	0	0	0	0	0	0	0	0
k__Bacteria;p__Bacteroidetes;c__Flavobacteriia;o__Flavobacteriales;f__Flavobacteriaceae;g__Flavobacterium;s__Flavobacterium_petrolei	0	5	0	0	0	0	0	0	0	0	0	0	0	0	0	0	0	2	0	0	3	0	0	3	0	0	0	0	0	0	0	0	0	0	0	0	0	0	0	0	0	0	0	0	0	0	0	0
k__Bacteria;p__Bacteroidetes;c__Flavobacteriia;o__Flavobacteriales;f__Flavobacteriaceae;g__Flavobacterium;s__Flavobacterium_psychrophilum	0	3	0	0	0	0	0	0	0	0	0	0	0	0	0	0	0	0	0	0	0	0	0	0	0	0	0	0	0	0	0	1	0	0	0	0	0	0	0	0	0	0	0	0	0	0	0	0
k__Bacteria;p__Bacteroidetes;c__Flavobacteriia;o__Flavobacteriales;f__Flavobacteriaceae;g__Flavobacterium;s__Flavobacterium_sp.	0	3	0	0	0	0	0	0	0	0	0	1	0	0	0	0	0	1	0	3	0	0	0	0	0	0	0	0	0	0	0	0	0	1	0	0	4	0	0	0	0	0	0	0	0	0	0	0
k__Bacteria;p__Bacteroidetes;c__Flavobacteriia;o__Flavobacteriales;f__Flavobacteriaceae;g__Flavobacterium;s__Flavobacterium_sp._F52	0	1	2	3	0	0	2	1	3	5	4	1	3	0	4	11	8	2	2	2	6	8	4	2	5	2	2	0	1	1	1	7	4	0	9	1	2	1	1	0	10	1	6.043	4	2	5	4	1
k__Bacteria;p__Bacteroidetes;c__Flavobacteriia;o__Flavobacteriales;f__Flavobacteriaceae;g__Flavobacterium;s__Flavobacterium_sp._GA093	1.352	0	5	2.026	0	1	0	2.049	1.521	0	0	1	0	3.368	1	2	1	1.516	0	1.54	4	4	6	0	0	1	1.52	0	2	5	2	1.349	8.068	1	0	1	0	6.861	2	0	3	0	2	1	2	3	1	1
k__Bacteria;p__Bacteroidetes;c__Flavobacteriia;o__Flavobacteriales;f__Flavobacteriaceae;g__Flavobacterium;s__Flavobacterium_sp._GT3R68	0	4	0	0	0	0	0	0	0	0	0	0	0	0	0	0	0	0	0	2	0	0	0	0	0	0	0	0	2	0	0	0	0	0	0	0	0	0	0	0	0	0	0	0	2	0	0	0
k__Bacteria;p__Bacteroidetes;c__Flavobacteriia;o__Flavobacteriales;f__Flavobacteriaceae;g__Flavobacterium;s__Flavobacterium_sp._IMCC34852	2	3	0	0	0	0	0	0	0	0	0	0	0	0	0	0	0	0	0	0	0	0	0	0	0	0	0	0	0	0	1	0	0	0	0	0	0	0	0	0	0	0	0	0	1	0	2	0
k__Bacteria;p__Bacteroidetes;c__Flavobacteriia;o__Flavobacteriales;f__Flavobacteriaceae;g__Flavobacterium;s__Flavobacterium_sp._LM5	0	5	0	0	0	0	0	0	0	0	0	0	0	0	0	0	0	0	0	0	0	0	0	0	0	0	0	0	0	0	0	0	0	0	0	0	0	0	0	0	0	1	0	0	0	0	0	0
k__Bacteria;p__Bacteroidetes;c__Flavobacteriia;o__Flavobacteriales;f__Flavobacteriaceae;g__Flavobacterium;s__Flavobacterium_sp._LaA7.5	0	0	0	4	0	3	8	2	2	3	0	0	1	0	1	3	0	4	2	3	7	0	1	2	1	1	4	2	0	0	1	4	4	0	1	1	0	6	0	1	1	4	0	2	4	0	1	2
k__Bacteria;p__Bacteroidetes;c__Flavobacteriia;o__Flavobacteriales;f__Flavobacteriaceae;g__Flavobacterium;s__Flavobacterium_sp._ZT4R6	0	0	0	0	0	0	0	0	0	0	0	0	0	0	0	0	0	4	0	0	2	0	0	0	0	0	0	0	0	0	0	0	0	0	0	0	0	0	0	0	0	0	0	0	0	0	0	0
k__Bacteria;p__Bacteroidetes;c__Flavobacteriia;o__Flavobacteriales;f__Flavobacteriaceae;g__Hanstruepera;s__Hanstruepera_crassostreae	0	2	1	0	2	0	0	0	0	2	3	0	1	0	0	0	2	1	0	3	0	0	0	0	1	0	0	1	0	0	0	0	0	1	1	0	0	1	2	2	0	0	7	1	1	0	0	1
k__Bacteria;p__Bacteroidetes;c__Flavobacteriia;o__Flavobacteriales;f__Flavobacteriaceae;g__Lutibacter;s__Lutibacter_sp.	5	0	8	0	0	0	0	0	0	0	0	1	0	0	0	0	0	0	0	0	0	0	3	0	8.879	0	16.256	16.505	16.63	12.729	12.06	0	0	0	0	0	0	0	0	0	0	0	0	0	0	0	0	0
k__Bacteria;p__Bacteroidetes;c__Flavobacteriia;o__Flavobacteriales;f__Flavobacteriaceae;g__Marixanthomonas;s__Marixanthomonas_ophiurae	0	0	0	0	0	0	0	0	0	0	0	0	0	0	0	0	0	4	0	0	0	0	0	0	0	0	0	0	0	0	0	0	0	0	0	0	0	0	0	0	0	0	0	0	0	4	0	0
k__Bacteria;p__Bacteroidetes;c__Flavobacteriia;o__Flavobacteriales;f__Flavobacteriaceae;g__Muricauda;s__Muricauda_alvinocaridis	0	0	0	0	0	0	0	0	0	0	0	0	0	0	0	0	0	0	0	0	0	0	0	0	0	0	0	0	0	0	0	0	0	4.468	5	0	0	0	0	0	0	0	0	0	0	0	0	0
k__Bacteria;p__Bacteroidetes;c__Flavobacteriia;o__Flavobacteriales;f__Flavobacteriaceae;g__Myroides;s__Myroides_guanonis	0	3	0	0	0	0	0	0	0	0	0	0	0	0	0	0	0	0	0	0	0	0	0	0	0	0	0	0	0	0	0	0	0	0	0	0	0	0	0	0	0	0	0	0	0	0	0	0
k__Bacteria;p__Bacteroidetes;c__Flavobacteriia;o__Flavobacteriales;f__Flavobacteriaceae;g__Polaribacter;s__Polaribacter_sp._20A6	0	0	1	8	7	0	0	2	1	0	0	3	1	0	1	0	3	0	0	4	0	1	0	2	4	2	3	4	0	0	0	0	2	3	3	1	1	0	1	0	0	0	4	0	1	0	0	2
k__Bacteria;p__Bacteroidetes;c__Flavobacteriia;o__Flavobacteriales;f__Flavobacteriaceae;g__Tamlana;s__Tamlana_crocina	293.868	381.19	268.555	288.181	342.891	320.292	535.409	232.589	500.505	399.351	351.421	865.207	344.222	309.295	251.867	383.911	250.251	192.2	647.603	258.345	472.666	428.286	244.548	308.511	279.198	214.072	338.612	390.362	694.096	319.747	259.452	600.135	411.423	388.849	192.149	232.092	215.66	273.779	267.47	283.015	210.172	393.336	447.182	290.671	295.317	256.824	342.119	321.779
k__Bacteria;p__Bacteroidetes;c__Flavobacteriia;o__Flavobacteriales;f__Flavobacteriaceae;g__Tenacibaculum;s__Tenacibaculum_ovolyticum	0	0	0	0	0	0	0	0	0	0	0	0	0	0	0	0	0	0	0	0	0	0	0	0	0	0	0	0	0	4	1.631	0	0	0	0	0	0	0	0	0	0	0	0	0	0	0	0	0
k__Bacteria;p__Bacteroidetes;c__Flavobacteriia;o__Flavobacteriales;f__Flavobacteriaceae;g__Tenacibaculum;s__Tenacibaculum_skagerrakense	0	0	0	0	0	0	0	0	0	0	0	0	0	0	0	0	0	0	0	0	0	0	0	0	1	0	4	1	1	1	0	0	0	0	0	0	0	0	0	0	0	0	0	0	0	0	0	0
k__Bacteria;p__Bacteroidetes;c__Flavobacteriia;o__Flavobacteriales;f__Flavobacteriaceae;g__Urechidicola;s__Urechidicola_croceus	0	0	0	0	0	0	0	0	0	0	0	0	0	0	0	0	0	0	0	0	0	0	0	0	0	0	0	0	0	3	1	0	0	0	0	0	0	0	0	0	0	0	0	0	0	0	0	0
k__Bacteria;p__Bacteroidetes;c__Flavobacteriia;o__Flavobacteriales;f__Flavobacteriaceae;g__Zhouia;s__Zhouia_amylolytica	0	0	0	0	0	0	0	0	0	0	0	0	0	0	0	0	0	0	0	0	0	0	0	0	1	0	1	3	0	0	0	0	0	0	0	0	0	0	0	0	0	0	0	0	0	0	0	0
k__Bacteria;p__Bacteroidetes;c__Flavobacteriia;o__Flavobacteriales;f__Flavobacteriaceae;g__Zobellia;s__Zobellia_laminariae	821.882	614.388	782.69	847.432	858.935	776.179	795.387	673.915	830.222	762.189	813.593	922.733	836.836	959.257	760.46	933.49	708.912	809.785	866.085	988.478	769.457	887.949	691.016	886.704	907.779	706.752	901.318	818.586	720.992	968.654	720.644	930.966	1015.19	745.638	716.674	607.55	693.763	568.989	770.343	535.193	610.578	549.315	862.782	795.072	761.124	693.527	729.676	799.958
k__Bacteria;p__Bacteroidetes;c__Flavobacteriia;o__Flavobacteriales;f__Flavobacteriaceae;g__unclassified;s__Flavobacteriaceae_bacterium	4	0	0	0	0	2	0	2	0	0	0	1.878	0	3	0	0	0	0	0	0	0	0	0	0	0	0	0	0	0	0	0	0	0	0	0	0	0	0	0	0	0	0	0.408	1	0	0	1	0
k__Bacteria;p__Bacteroidetes;c__Flavobacteriia;o__Flavobacteriales;f__Flavobacteriaceae;g__unclassified;s__Flavobacteriaceae_bacterium_R33	0	5	0	0	0	0	0	0	0	0	0	0	0	0	0	0	0	0	0	0	0	0	0	0	0	1	0	0	0	0	0	0	0	0	0	0	0	0	0	0	0	0	0	0	0	0	0	0
k__Bacteria;p__Bacteroidetes;c__Flavobacteriia;o__Flavobacteriales;f__Flavobacteriaceae;g__unclassified;s__Flavobacteriaceae_bacterium_UR159	0	1	2	1	3	0	0	1	0	0	0	0	0	0	0	0	0	0	0	0	0	0	2	0	0	0	0	1	0	0	0	0	0	0	0	0	0	0	0	1	0	0	2	0	1	0	1	0
k__Bacteria;p__Bacteroidetes;c__Flavobacteriia;o__Flavobacteriales;f__Schleiferiaceae;g__Thermaurantimonas;s__Thermaurantimonas_aggregans	0	4.478	0	0	0	0	0	3	0	0	0	0	0	0	0	0	0	0	0	0	0	0	0	0	0	0	0	0	0	0	0	0	0	0	0	0	0	0	0	0	0	0	0	0	0	0	0	0
k__Bacteria;p__Bacteroidetes;c__Flavobacteriia;o__Flavobacteriales;f__Weeksellaceae;g__Apibacter;s__Apibacter_sp._B3883	1.374	0	5	4.152	4	0	3	6	2	2	2	4.454	2	1	0	2	5	3	0	1	4	0	0	4	2	6	6	3	3	2.382	3	1	2	2	1	3	0	1	5	4	2	1	2	0	4	0	3	4
k__Bacteria;p__Bacteroidetes;c__Flavobacteriia;o__Flavobacteriales;f__Weeksellaceae;g__Apibacter;s__Apibacter_sp._B3935	0	0	0	0	1	0	0	0	0	0	0	0	0	0	1	0	6	2	2	0	0	0	0	0	1	0	0	0	0	0	0	0	0	0	0	0	2	0	1	0	0	0	0	0	0	0	0	3
k__Bacteria;p__Bacteroidetes;c__Flavobacteriia;o__Flavobacteriales;f__Weeksellaceae;g__Chryseobacterium;s__Chryseobacterium_sp._8AT	0	3	0	0	0	0	0	0	0	0	2	0	0	0	1	0	0	0	0	0	0	0	2	0	0	0	0	0	0	0	0	0	0	0	0	0	0	0	0	0	0	0	0	0	1	0	0	0
k__Bacteria;p__Bacteroidetes;c__Flavobacteriia;o__Flavobacteriales;f__Weeksellaceae;g__Chryseobacterium;s__Chryseobacterium_sp._IHB_B_17019	0	3	0	0	0	0	0	0	0	0	0	0	0	0	0	0	0	0	0	0	0	0	0	0	0	0	0	0	0	0	0	0	0	0	0	0	0	0	0	0	0	0	0	0	0	0	0	0
k__Bacteria;p__Bacteroidetes;c__Flavobacteriia;o__Flavobacteriales;f__Weeksellaceae;g__Chryseobacterium;s__Chryseobacterium_sp._NEB161	0	4	0	0	0	0	0	0	0	0	0	1	0	0	1	0	0	0	0	0	0	0	0	0	0	0	1	0	0	0	0	0	0	0	0	0	0	0	0	0	0	0	0	0	0	0	0	0
k__Bacteria;p__Bacteroidetes;c__Flavobacteriia;o__Flavobacteriales;f__Weeksellaceae;g__Cloacibacterium;s__Cloacibacterium_normanense	347.255	241.955	306.176	400.581	329.722	357.532	335.534	283.767	381.622	304.741	326.51	370.259	346.684	368.652	294.366	415.181	297.021	332.717	349.631	398.166	308.295	383.677	287.21	370.643	397.938	286.258	375.082	364.879	342.851	395.52	259.014	441.758	442.314	292.446	311.892	322.398	263.833	211.769	308.239	192.822	254.489	223.891	350.957	313.867	251.688	290.073	331.165	356.367
k__Bacteria;p__Bacteroidetes;c__Flavobacteriia;o__Flavobacteriales;f__Weeksellaceae;g__Riemerella;s__Riemerella_anatipestifer	7	7	12	18	9	17	15.798	5	11	13	9	6	11	15	12	11	8	13	8.843	22	9	12	5	10	5	14	9	13	10	12	8	12	12	8.173	9	9	8	3	5	9	7	4	13	8	7	5	13	11
k__Bacteria;p__Bacteroidetes;c__Flavobacteriia;o__Flavobacteriales;f__unclassified;g__unclassified;s__Flavobacteriales_bacterium	0	0	0	2	0	0	0	1	0	0	1	0	0	0	0	0	0	0	0	0	1	0	0	1	0	0	1	0	1	0	0	1	0	0	0	0	0	0	0	0	0	0	0	4	0	0	0	0
k__Bacteria;p__Bacteroidetes;c__Flavobacteriia;o__Flavobacteriales;f__unclassified;g__unclassified;s__Flavobacteriales_bacterium_CG_4_9_14_3_um_filter_40_17	0	2	0	0	0	0	0	2	0	0	0	0	0	0	3	0	0	0	0	0	0	0	0	0	0	0	0	0	0	0	0	0	0	0	0	0	0	0	0	0	0	0	0	0	0	0	0	0
k__Bacteria;p__Bacteroidetes;c__Saprospiria;o__Saprospirales;f__Haliscomenobacteraceae;g__Haliscomenobacter;s__Haliscomenobacter_hydrossis	0	0	0	0	0	0	0	0	0	0	2	0	0	0	0	0	4	0	0	0	0	0	0	0	1	0	0	2	0	0	0	0	0	0	0	0	0	0	0	0	0	1	0	0	0	0	0	0
k__Bacteria;p__Bacteroidetes;c__Saprospiria;o__Saprospirales;f__Saprospiraceae;g__unclassified;s__Saprospiraceae_bacterium	2	3	3	2	5	1	2	0	7	1	5	1	0	4	0	1	3	2	2	1	0	0	8	4	1	1	3	0	3	2	5	3	4	1	1	3	2	0	3	1	1	0	0	0	2	2	1	4
k__Bacteria;p__Bacteroidetes;c__Sphingobacteriia;o__Sphingobacteriales;f__Sphingobacteriaceae;g__Albibacterium;s__Albibacterium_bauzanense	20	0	20	0	0	0	0	0	0	0	0	0	0	0	0	1	0	0	0	0	0	0	0	0	56	0	47	49	35	36	40	0	0	0	0	0	0	0	0	0	0	0	0	0	0	0	0	0
k__Bacteria;p__Bacteroidetes;c__Sphingobacteriia;o__Sphingobacteriales;f__Sphingobacteriaceae;g__Mucilaginibacter;s__Mucilaginibacter_hurinus	1046.15	689.436	981.458	1062.27	934.322	826.211	1019.6	704.688	1101.81	917.672	862.626	1090.4	989.613	1200.8	891.057	1087.21	833.052	911.969	957.616	1232.24	1046.29	1066.54	777.646	1130.76	991.439	787.121	1110.43	1118.4	965.709	1049.34	918.083	1116.53	1178.32	955.396	836.623	877.733	808.061	719.205	901.001	626.564	764.054	673.728	1150.38	992.912	875.804	820.771	880.534	972.651
k__Bacteria;p__Bacteroidetes;c__Sphingobacteriia;o__Sphingobacteriales;f__Sphingobacteriaceae;g__Mucilaginibacter;s__Mucilaginibacter_kameinonensis	1	0	0	0	0	4	0	0	0	0	0	0	0	0	0	0	0	0	0	0	0	4	1	2	0	0	0	0	0	0	0	0	0	0	0	0	0	0	0	0	0	0	0	0	0	0	0	0
k__Bacteria;p__Bacteroidetes;c__Sphingobacteriia;o__Sphingobacteriales;f__Sphingobacteriaceae;g__Mucilaginibacter;s__Mucilaginibacter_paludis	0	0	0	0	0	0	0	0	0	0	0	0	0	0	0	0	0	0	0	0	0	0	0	0	0	0	1	0	1	3.971	1.904	0	0	0	0	0	0	0	0	0	0	0	0	0	0	0	0	0
k__Bacteria;p__Bacteroidetes;c__Sphingobacteriia;o__Sphingobacteriales;f__Sphingobacteriaceae;g__Mucilaginibacter;s__Mucilaginibacter_sp._JXJ_CY_39	0	0	0	0	0	0	0	0	0	0	0	0	0	0	0	0	0	0	0	0	0	0	0	0	0	0	0	0	0	0	0	0	0	0	0	0	0	0	0	0	0	0	0	3	0	0	0	0
k__Bacteria;p__Bacteroidetes;c__Sphingobacteriia;o__Sphingobacteriales;f__Sphingobacteriaceae;g__Pararcticibacter;s__Pararcticibacter_amylolyticus	4	0	2	0	0	0	0	0	0	0	0	0	0	0	0	0	0	0	0	0	0	0	0	0	0	0	1	0	2	0	1.736	0	0	0	0	0	0	0	0	0	0	0	0	0	0	0	0	0
k__Bacteria;p__Bacteroidetes;c__Sphingobacteriia;o__Sphingobacteriales;f__Sphingobacteriaceae;g__Pedobacter;s__Pedobacter_changchengzhani	0	3	0	0	0	0	0	0	0	0	0	0	0	0	1	0	0	0	0	1	0	0	1	2	0	0	0	0	0	0	0	0	0	0	0	0	0	0	0	0	0	0	0	0	0	0	1	0
k__Bacteria;p__Bacteroidetes;c__Sphingobacteriia;o__Sphingobacteriales;f__Sphingobacteriaceae;g__Pedobacter;s__Pedobacter_glucosidilyticus	0	1	0	0	0	0	0	0	1	0	4	0	0	0	0	0	1	0	0	0	0	0	1	0	0	0	0	0	0	0	0	1	0	0	0	0	0	0	6	0	0	0	0	0	0	0	0	0
k__Bacteria;p__Bacteroidetes;c__Sphingobacteriia;o__Sphingobacteriales;f__Sphingobacteriaceae;g__Pedobacter;s__Pedobacter_sp._OK628	0	3	0	0	0	0	1	0	0	0	0	0	0	0	0	0	0	0	0	0	0	0	0	0	0	0	0	1	0	0	0	0	0	0	0	0	0	0	0	0	0	0	0	0	0	0	0	0
k__Bacteria;p__Bacteroidetes;c__Sphingobacteriia;o__Sphingobacteriales;f__Sphingobacteriaceae;g__Pedobacter;s__Pedobacter_sp._RP-1-13	0	0	0	0	0	0	0	0	0	0	0	0	0	0	0	0	0	0	0	0	0	0	2	3	0	0	0	0	0	0	0	0	0	0	0	0	0	0	0	0	0	0	0	0	0	0	0	0
k__Bacteria;p__Bacteroidetes;c__Sphingobacteriia;o__Sphingobacteriales;f__Sphingobacteriaceae;g__Pedobacter;s__Pedobacter_steynii	0	0	0	0	0	3	0	0	0	0	0	0	0	0	0	0	0	2	0	0	0	0	0	0	0	0	0	0	0	0	0	0	0	0	0	0	0	0	1	0	0	0	0	0	0	0	0	0
k__Bacteria;p__Bacteroidetes;c__Sphingobacteriia;o__Sphingobacteriales;f__Sphingobacteriaceae;g__Pedobacter;s__Pedobacter_ureilyticus	0	0	0	0	0	0	0	0	0	0	0	0	0	0	0	0	0	3	0	0	0	0	1	0	0	0	0	1	0	0	0	0	0	0	0	0	0	0	0	0	0	0	0	0	0	0	0	0
k__Bacteria;p__Bacteroidetes;c__Sphingobacteriia;o__Sphingobacteriales;f__Sphingobacteriaceae;g__Pseudopedobacter;s__Pseudopedobacter_saltans	0	0	0	1	0	0	0	0	0	0	0	3	0	0	0	0	0	0	0	0	0	0	0	0	0	0	0	0	0	0	0	0	0	0	0	0	0	0	0	0	0	0	0	0	0	0	0	0
k__Bacteria;p__Bacteroidetes;c__Sphingobacteriia;o__Sphingobacteriales;f__Sphingobacteriaceae;g__Sphingobacterium;s__Sphingobacterium_alimentarium	2	0	0	0	0	0	0	0	0	0	0	0	0	0	0	0	0	0	0	0	0	0	0	0	4	0	1	3	0	2	1	0	0	0	0	0	0	0	0	0	0	0	0	0	0	0	0	0
k__Bacteria;p__Bacteroidetes;c__Sphingobacteriia;o__Sphingobacteriales;f__Sphingobacteriaceae;g__Sphingobacterium;s__Sphingobacterium_bovisgrunnientis	0	0	0	0	0	0	0	0	0	0	0	0	0	0	0	0	0	0	0	0	0	0	0	0	0	0	0	0	0	0	0	0	0	1	4	0	0	0	0	0	0	0	0	0	0	0	0	0
k__Bacteria;p__Bacteroidetes;c__Sphingobacteriia;o__Sphingobacteriales;f__Sphingobacteriaceae;g__unclassified;s__Sphingobacteriaceae_bacterium	0	0	0	0	1	0	1	0	0	0	0	0	0	0	0	0	5	0	1	0	0	0	0	0	0	0	0	0	0	1	0	0	1	8	6	0	2	0	1	0	0	0	0	0	0	0	0	0
k__Bacteria;p__Bacteroidetes;c__Sphingobacteriia;o__Sphingobacteriales;f__unclassified;g__unclassified;s__Sphingobacteriales_bacterium	3	5	0	0	0	0	1	2	0	1	0	1	0	2	1	0	2	1	0	0	0	0	3	0	0	1	0	0	0	3	0	0	0	1	0	0	0	0	0	0	0	0	4	0	0	1	0	0
k__Bacteria;p__Bacteroidetes;c__Sphingobacteriia;o__Sphingobacteriales;f__unclassified;g__unclassified;s__Sphingobacteriales_bacterium_48-107	0	4	0	0	0	0	0	0	0	0	0	0	0	0	0	0	0	0	0	0	0	0	0	0	0	0	0	0	0	0	1	0	0	0	0	0	0	0	0	0	0	0	0	0	1	0	0	0
k__Bacteria;p__Bacteroidetes;c__Sphingobacteriia;o__Sphingobacteriales;f__unclassified;g__unclassified;s__Sphingobacteriales_bacterium_UPWRP_1	0	3	0	0	0	0	0	0	0	0	0	0	0	0	0	0	0	0	0	0	0	0	0	0	2	1	0	0	0	0	0	0	0	0	0	0	0	0	0	0	0	0	0	0	0	0	0	0
k__Bacteria;p__Bacteroidetes;c__Sphingobacteriia;o__unclassified;f__unclassified;g__unclassified;s__Sphingobacteriia_bacterium	30	119.759	8	13	6	13	2	22	1	12	11	5	0	2	3	7	9	22	1	2	10	7	36	2	2	8	2	5	2	6	4	2	1	4	3	6	5	2	20	8	3	1	9	0	3	4	2	8
k__Bacteria;p__Bacteroidetes;c__Sphingobacteriia;o__unclassified;f__unclassified;g__unclassified;s__Sphingobacteriia_bacterium_28-36-52	3	21	0	3	0	2	0	4	0	0	0	0	0	0	2	0	0	5	0	1	2	1	6	5	0	0	0	0	0	0	0	1	0	0	0	0	0	3	8	4	0	0	1	0	0	0	0	1
k__Bacteria;p__Bacteroidetes;c__Sphingobacteriia;o__unclassified;f__unclassified;g__unclassified;s__Sphingobacteriia_bacterium_32-37-4	0	0	1	0	0	0	2	1	0	0	0	0	0	0	0	0	0	2	4	0	0	0	3	0	0	0	0	0	0	0	0	0	0	0	0	0	0	0	2	4	0	0	0	0	0	0	0	0
k__Bacteria;p__Bacteroidetes;c__Sphingobacteriia;o__unclassified;f__unclassified;g__unclassified;s__Sphingobacteriia_bacterium_35-40-8	0	0	0	0	0	0	0	3	0	0	0	3	0	0	0	0	0	0	0	0	0	0	0	0	0	0	0	0	0	0	0	0	0	0	0	0	0	0	0	0	0	0	0	0	0	0	0	0
k__Bacteria;p__Bacteroidetes;c__Sphingobacteriia;o__unclassified;f__unclassified;g__unclassified;s__Sphingobacteriia_bacterium_39-36-14	1	7	0	1	1	5	3	7	1	0	2	4	0	0	0	0	0	2	0	0	0	0	6	0	0	0	0	0	1	3	1	0	0	0	0	0	0	0	1	2	0	0	3	0	0	0	0	0
k__Bacteria;p__Bacteroidetes;c__Sphingobacteriia;o__unclassified;f__unclassified;g__unclassified;s__Sphingobacteriia_bacterium_39-39-8	2	3	0	0	0	0	0	0	0	0	1	0	0	0	0	0	0	0	0	0	0	0	0	0	0	0	0	0	0	0	1	0	0	0	0	0	0	0	3	0	0	0	0	0	0	0	0	0
k__Bacteria;p__Bacteroidetes;c__Sphingobacteriia;o__unclassified;f__unclassified;g__unclassified;s__Sphingobacteriia_bacterium_RIFOXYD2_FULL_35_12	2	21	0	3	3	3	0	0	0	0	1	0	0	0	8	0	0	0	0	0	0	0	3	4	0	0	1	0	0	0	1	0	0	0	0	0	0	0	0	0	0	0	1	0	0	0	0	0
k__Bacteria;p__Bacteroidetes;c__unclassified;o__Bacteroidetes_Order_II._Incertae_sedis;f__Rhodothermaceae;g__Rhodothermus;s__Rhodothermus_marinus	1	0	2	0	0	0	0	0	0	0	0	0	0	0	0	0	0	0	0	0	0	0	0	0	1	0	4	1	1	0	0	0	0	0	0	0	0	0	0	0	0	0	0	0	0	0	0	0
k__Bacteria;p__Bacteroidetes;c__unclassified;o__Bacteroidetes_Order_II._Incertae_sedis;f__Rhodothermaceae;g__Salinibacter;s__Salinibacter_sp._10B	0	1	0	0	1	1	0	0	0	10	0	0	4	0	0	0	0	2	0	0	0	0	0	3	1	2	2	0	0	0	0	0	0	0	1	1	0	0	1	1	0	1	0	0	0	0	0	0
k__Bacteria;p__Bacteroidetes;c__unclassified;o__Bacteroidetes_Order_II._Incertae_sedis;f__Rhodothermaceae;g__unclassified;s__Rhodothermaceae_bacterium	1	0	0	0	0	0	0	0	0	0	0	0	0	0	0	0	0	0	0	0	0	0	0	0	1	0	1.391	1	3	0	1.22	0	0	0	0	0	0	0	0	0	0	0	0	0	0	0	0	0
k__Bacteria;p__Bacteroidetes;c__unclassified;o__unclassified;f__unclassified;g__unclassified;s__Bacteriodetes_bacterium	0	0	1	0	0	0	0	0	0	0	0	0	0	0	0	0	0	0	0	0	0	0	0	0	1	0	0	1	0	0	4	0	0	0	0	0	0	0	0	0	0	0	0	0	0	0	0	0
k__Bacteria;p__Bacteroidetes;c__unclassified;o__unclassified;f__unclassified;g__unclassified;s__Bacteroidetes_bacterium	9	12	11.667	0	6	1	0	1	2	0	3	6	1	1	5	3	1	6	1	0	2	1	4	0	21.554	0	29.719	26.153	26.381	29.271	17.787	0	1	6	0	2	0	1	1	1	4	1	6	4	2	3	1	1
k__Bacteria;p__Bacteroidetes;c__unclassified;o__unclassified;f__unclassified;g__unclassified;s__Bacteroidetes_bacterium_46-16	0	3	0	0	0	0	0	0	0	0	0	0	0	0	0	0	0	0	0	0	0	0	0	0	0	0	0	0	0	0	0	0	0	0	0	0	0	0	0	0	0	0	0	0	0	0	1	0
k__Bacteria;p__Bacteroidetes;c__unclassified;o__unclassified;f__unclassified;g__unclassified;s__Bacteroidetes_bacterium_ADurb.Bin123	0	1	0	0	0	2	0	0	0	0	0	0	0	0	0	0	0	0	0	0	1	0	0	2	0	3	0	1	0	0	0	0	1	0	1	1	0	0	0	0	0	0	0	1	0	0	0	0
k__Bacteria;p__Bacteroidetes;c__unclassified;o__unclassified;f__unclassified;g__unclassified;s__Bacteroidetes_bacterium_GWF2_33_16	0	0	1	0	0	5	0	0	0	0	1	0	0	0	0	0	0	0	0	0	0	0	0	0	2	0	1	0	2	0	0	1	2	0	0	0	0	0	0	0	0	0	0	0	0	0	0	0
k__Bacteria;p__Balneolaeota;c__Balneolia;o__Balneolales;f__Balneolaceae;g__Aliifodinibius;s__Aliifodinibius_saliphilus	0	0	0	3	0	2	0	0	0	0	0	0	0	0	0	0	0	0	0	0	0	0	0	0	0	0	0	0	0	0	0	0	0	0	0	0	0	0	3	0	0	0	0	0	0	0	0	0
k__Bacteria;p__Balneolaeota;c__Balneolia;o__Balneolales;f__Balneolaceae;g__Balneola;s__Balneola_sp._EhC07	0	6	0	0	0	0	3	0	0	0	2	0	1	0	0	2	0	0	2	1	0	0	0	0	0	1	0	0	0	0	0	0	2	0	0	0	1	3	0	1	0	0	0	0	0	0	4	2
k__Bacteria;p__Balneolaeota;c__Balneolia;o__Balneolales;f__Balneolaceae;g__Gracilimonas;s__Gracilimonas_amylolytica	10	0	13	0	0	0	0	0	0	0	0	0	0	0	0	0	0	0	0	0	0	0	0	0	23	0	29	13	18	25	25	0	0	0	0	0	0	0	0	0	0	0	0	0	0	0	0	0
k__Bacteria;p__Balneolaeota;c__Balneolia;o__Balneolales;f__Balneolaceae;g__unclassified;s__Balneolaceae_bacterium	0	0	0	0	0	0	0	0	0	2	0	1	0	0	0	0	0	1	0	4	1	1	0	2.022	0	0	0	0	0	2	0	0	0	1	0	2	0	0	0	0	0	0	0	0	0	0	0	0
k__Bacteria;p__Calditrichaeota;c__Calditrichae;o__Calditrichales;f__Calditrichaceae;g__Caldithrix;s__Caldithrix_sp.	0	0	2	0	0	0	0	0	0	0	0	0	0	0	0	0	0	0	0	0	0	0	0	0	0	0	0	0	0	3	0	0	0	0	0	0	0	0	0	0	0	0	0	0	0	0	0	0
k__Bacteria;p__Calditrichaeota;c__Calditrichae;o__Calditrichales;f__unclassified;g__unclassified;s__Calditrichales_bacterium	2	0	1	0	0	0	0	0	0	0	0	0	0	0	0	0	0	0	0	0	0	0	0	0	2.323	0	6.662	4.125	0	0	2	0	0	0	0	0	0	0	0	0	0	0	0	0	0	0	0	0
k__Bacteria;p__Calditrichaeota;c__unclassified;o__unclassified;f__unclassified;g__unclassified;s__Calditrichaeota_bacterium	1	0	1	0	0	0	0	0	0	0	0	0	0	0	0	0	0	0	0	0	0	0	0	0	6.206	0	4	5	3	1	3.322	0	0	0	0	0	0	0	0	0	0	0	0	0	0	0	0	0
k__Bacteria;p__Candidatus_Aminicenantes;c__unclassified;o__unclassified;f__unclassified;g__unclassified;s__Candidatus_Aminicenantes_bacterium	5	0	4	1	0	0	0	0	0	0	0	0	0	0	0	0	0	0	0	0	0	0	0	0	10	0	18.275	8	7	18	8	0	0	0	0	0	0	0	0	0	0	0	0	0	0	0	0	0
k__Bacteria;p__Candidatus_Dadabacteria;c__unclassified;o__unclassified;f__unclassified;g__unclassified;s__Candidatus_Dadabacteria_bacterium	0	0	1	1	2	2	0	0	0	0	0	0	1	1	1	0	2	0	0	0	0	0	0	0	0	3	0	0	0	0	0	3	1	0	1	0	0	0	2	0	1	2	1	0	0	4	0	2
k__Bacteria;p__Candidatus_Daviesbacteria;c__unclassified;o__unclassified;f__unclassified;g__unclassified;s__Candidatus_Daviesbacteria_bacterium_RIFCSPLOWO2_01_FULL_43_38	5	0	5	0	0	0	0	0	0	0	0	0	0	0	0	0	0	0	0	0	0	0	0	0	9.322	0	12.957	8.266	6.235	13.238	11	0	0	0	0	0	0	0	0	0	0	0	0	0	0	0	0	0
k__Bacteria;p__Candidatus_Eremiobacteraeota;c__unclassified;o__Candidatus_Eremiobacterales;f__unclassified;g__Candidatus_Eremiobacter;s__Candidatus_Eremiobacter_sp._RRmetagenome_bin22	2	0	0	0	0	3	1	0	0	0	0	0	8	0	0	0	0	0	0	1	0	0	0	1	0	0	0	0	0	1	0	1	0	0	2	0	0	0	0	2	0	0	0	0	0	1	0	0
k__Bacteria;p__Candidatus_Giovannonibacteria;c__unclassified;o__unclassified;f__unclassified;g__unclassified;s__Candidatus_Giovannonibacteria_bacterium_RIFCSPLOWO2_12_FULL_44_15	0	0	0	0	0	1	4	0	0	0	0	0	0	0	0	0	1	0	1	2	0	2	1	0	0	0	0	2	1	0	1	1	1	0	0	0	0	3	0	1	0	0	0	0	1	0	1	0
k__Bacteria;p__Candidatus_Hydrogenedentes;c__unclassified;o__unclassified;f__unclassified;g__Candidatus_Hydrogenedens;s__Candidatus_Hydrogenedens_sp.	2	0	6	0	0	0	0	0	0	0	0	0	0	0	0	0	0	0	0	0	0	0	0	0	5	0	12	7	5	1	6	0	0	0	0	0	0	0	0	0	0	0	0	0	0	0	0	0
k__Bacteria;p__Candidatus_Hydrogenedentes;c__unclassified;o__unclassified;f__unclassified;g__unclassified;s__Candidatus_Hydrogenedentes_bacterium	3	0	1	0	0	0	0	0	0	0	0	0	0	0	0	0	0	0	0	0	0	0	0	0	3	0	8	3	3	5	1	0	0	0	0	0	0	0	0	0	0	0	0	0	0	0	0	0
k__Bacteria;p__Candidatus_Magasanikbacteria;c__unclassified;o__unclassified;f__unclassified;g__unclassified;s__Candidatus_Magasanikbacteria_bacterium_RIFCSPLOWO2_01_FULL_33_34	0	0	0	0	1	0	0	0	1	0	0	3	0	1	0	0	0	0	0	2	0	0	0	0	0	0	0	0	2	0	1	0	0	0	3	0	0	4	1	0	0	0	2	0	3	0	0	0
k__Bacteria;p__Candidatus_Magasanikbacteria;c__unclassified;o__unclassified;f__unclassified;g__unclassified;s__Candidatus_Magasanikbacteria_bacterium_RIFOXYA2_FULL_40_20	0	1	3	0	0	0	0	1	0	0	0	0	0	2	0	1	1	1	3	1	1	0	1	0	0	0	0	0	0	2	0	3	7	0	0	0	2	0	0	3	0	0	0	1	3	0	1	1
k__Bacteria;p__Candidatus_Marinimicrobia;c__unclassified;o__unclassified;f__unclassified;g__unclassified;s__Candidatus_Marinimicrobia_bacterium	10	0	8.271	1	2	2	0	0	0	1	2	4	1	1	0	0	0	0	2	0	1	2	0	2	18.181	0	12	11	20	6	11	0	1	3	0	1	0	0	0	1	0	0	1	0	2	1	0	0
k__Bacteria;p__Candidatus_Melainabacteria;c__unclassified;o__Candidatus_Gastranaerophilales;f__unclassified;g__unclassified;s__Candidatus_Gastranaerophilales_bacterium_HUM_23	0	0	0	0	0	0	0	5	0	0	0	0	1116.4	1	0	0	0	0	0	0	51	0	0	0	0	0	0	0	0	0	0	0	22	0	0	0	0	0	0	0	0	0	1	3	0	1	616.836	0
k__Bacteria;p__Candidatus_Melainabacteria;c__unclassified;o__unclassified;f__unclassified;g__unclassified;s__Candidatus_Melainabacteria_bacterium	1	0	1	0	0	0	0	0	0	0	0	0	0	0	0	0	0	0	0	0	0	0	0	0	7	0	5	3	1	1	1	0	0	0	0	0	0	0	0	0	0	0	0	0	0	0	0	0
k__Bacteria;p__Candidatus_Melainabacteria;c__unclassified;o__unclassified;f__unclassified;g__unclassified;s__Candidatus_Melainabacteria_bacterium_HGW-Melainabacteria-1	2	0	1	0	0	0	0	0	0	0	0	0	0	1	0	0	0	0	0	0	0	0	0	0	0	0	2	0	0	0	0	0	0	0	0	0	0	0	0	0	0	2	0	0	4	0	0	0
k__Bacteria;p__Candidatus_Nealsonbacteria;c__unclassified;o__unclassified;f__unclassified;g__unclassified;s__Candidatus_Nealsonbacteria_bacterium	4	0	5	0	0	0	0	0	0	0	0	0	0	0	0	0	0	0	0	0	0	0	0	0	2	0	5	5	3	6	2	0	0	0	0	0	0	0	0	0	0	0	0	0	0	0	0	0
k__Bacteria;p__Candidatus_Omnitrophica;c__unclassified;o__unclassified;f__unclassified;g__unclassified;s__Candidatus_Omnitrophica_bacterium	1	0	1	1	0	5	1	3	0	1	1	2	0	1	0	2	1	1	0	0	0	1	1	0	0	1	6	2.5	2	1.5	6	1	4	0	0	1	0	0	2	0	4	0	5	0	0	3	2	2
k__Bacteria;p__Candidatus_Omnitrophica;c__unclassified;o__unclassified;f__unclassified;g__unclassified;s__Omnitrophica_WOR_2_bacterium_RIFCSPHIGHO2_02_FULL_67_20	2	0	0	0	0	0	0	0	0	0	0	0	0	0	0	0	0	0	0	0	0	0	0	0	4	0	1	4	6	4.557	7	0	0	0	0	0	0	0	0	0	0	0	0	0	0	0	0	0
k__Bacteria;p__Candidatus_Omnitrophica;c__unclassified;o__unclassified;f__unclassified;g__unclassified;s__Omnitrophica_bacterium_OLB16	3	0	2	0	0	0	0	0	0	0	0	0	0	0	0	0	0	0	0	0	0	0	0	0	3	0	1	3	3	3	1	0	0	0	0	0	0	0	0	0	0	0	0	0	0	0	0	0
k__Bacteria;p__Candidatus_Parcubacteria;c__unclassified;o__unclassified;f__unclassified;g__unclassified;s__Candidatus_Parcubacteria_bacterium	2	1	0	1	2	1	2	0	2	0	0	1	0	1	1	1	4	1	0	1	0	0	0	2	2	3	0	0	2	1	0	1	1	0	0	0	1	0	2	1	0	2	1	0	1	0	0	3
k__Bacteria;p__Candidatus_Peregrinibacteria;c__unclassified;o__unclassified;f__unclassified;g__unclassified;s__Candidatus_Peregrinibacteria_bacterium_CG_4_10_14_0_2_um_filter_43_11	3	0	3	0	0	0	0	0	0	0	0	0	0	0	0	0	0	0	0	0	0	0	0	0	7	0	21.723	6	9	3.266	8	0	0	0	0	0	0	0	0	0	0	0	0	0	0	0	0	0
k__Bacteria;p__Candidatus_Poribacteria;c__unclassified;o__unclassified;f__unclassified;g__unclassified;s__Candidatus_Poribacteria_bacterium	19	0	17	0	2	0	0	1	1	4	0	1	5	1	0	0	0	3	1	2	0	1	2	2	54.36	0	55.498	40	32	39	35	0	0	0	0	1	0	1	0	0	1	0	0	4	1	0	0	1
k__Bacteria;p__Candidatus_Roizmanbacteria;c__unclassified;o__unclassified;f__unclassified;g__unclassified;s__Candidatus_Roizmanbacteria_bacterium_GW2011_GWC2_37_13	2	0	0	0	0	0	0	0	0	0	0	0	0	0	0	0	0	0	0	0	0	0	0	0	6.678	0	1	2.18	1	2.126	0	0	0	0	0	0	0	0	0	0	0	0	0	0	0	0	0	0
k__Bacteria;p__Candidatus_Rokubacteria;c__unclassified;o__unclassified;f__unclassified;g__unclassified;s__Candidatus_Rokubacteria_bacterium	4	0	0	1	1	0	0	0	0	0	0	0	2	1	0	0	0	6	0	0	1	0	2	0	3	0	0	1	0	0	1	0	2	0	1	4	3	3	1	2	0	0	2	0	0	0	1	6
k__Bacteria;p__Candidatus_Saccharibacteria;c__unclassified;o__unclassified;f__unclassified;g__unclassified;s__Candidatus_Saccharibacteria_bacterium	0	0	0	2	0	0	2	0	0	0	4	0	0	0	0	0	0	0	0	0	1	0	0	1	0	1	0	0	0	0	1	0	0	0	0	0	0	5	0	0	0	0	2	1	0	2	0	0
k__Bacteria;p__Candidatus_Sumerlaeota;c__unclassified;o__unclassified;f__unclassified;g__unclassified;s__candidate_division_BRC1_bacterium_ADurb.BinA292	0	0	2	0	0	0	0	0	0	0	0	0	0	0	0	0	0	0	0	0	0	0	0	0	0	0	2	4	5	0	3	0	0	0	0	0	0	0	0	0	0	0	0	0	0	0	0	0
k__Bacteria;p__Candidatus_Tectomicrobia;c__unclassified;o__unclassified;f__unclassified;g__Candidatus_Entotheonella;s__Candidatus_Entotheonella_factor	13.844	3	2	4	6	3	4	5	5	5	4	12	9	7	5	2	7	6	3	4	4	3	3	8	7	2	8	7	4	7	6	5	7	8	6	0	3	7	4	4	4	12	8	8	4	8	10	3
k__Bacteria;p__Candidatus_Tectomicrobia;c__unclassified;o__unclassified;f__unclassified;g__Candidatus_Entotheonella;s__Candidatus_Entotheonella_gemina	0	0	0	1	7	0	0	1	0	0	1	0	0	2	0	0	0	0	0	1	0	0	0	0	0	0	0	0	1	0	0	0	0	0	1	1	3	0	0	0	0	0	0	0	0	0	0	0
k__Bacteria;p__Candidatus_Uhrbacteria;c__unclassified;o__unclassified;f__unclassified;g__unclassified;s__Candidatus_Uhrbacteria_bacterium	0	0	0	0	0	0	0	0	0	0	0	0	0	0	0	0	0	0	0	0	0	0	0	0	0	0	3	0	0	0	0	0	0	0	0	0	0	0	0	0	0	0	0	0	0	0	0	0
k__Bacteria;p__Chlamydiae;c__Chlamydiia;o__Chlamydiales;f__Chlamydiaceae;g__Candidatus_Rubidus;s__Candidatus_Rubidus_massiliensis	0	0	0	0	0	0	0	0	0	0	0	0	0	0	0	0	0	0	0	0	0	0	0	0	4	0	3	4	1	6	7	0	0	0	0	0	0	0	0	0	0	0	0	0	0	0	0	0
k__Bacteria;p__Chlamydiae;c__Chlamydiia;o__Chlamydiales;f__Chlamydiaceae;g__Chlamydia;s__Chlamydia_abortus	2798.33	2099.8	2863.09	3271.82	3009.26	3299.2	2982.87	2608.38	2825.79	2556.8	2649.54	2806.56	2733.09	3035.33	2619.23	2989.46	2993.8	2945.64	3021.4	3221.05	2531.77	3051.54	2758.69	3101.18	2780.22	2619.78	2862.62	2926.77	2813.54	3115.63	2663.8	3076.59	3475.23	2380.83	2619.02	2456.08	2221.97	2025.08	3090.08	1966.08	2167.74	1850.58	3090.74	2711.22	2318.31	2379.31	2477.47	2755.91
k__Bacteria;p__Chlamydiae;c__Chlamydiia;o__Chlamydiales;f__Chlamydiaceae;g__Chlamydia;s__Chlamydia_avium	0	0	0	0	0	0	0	0	0	0	0	0	0	0	0	0	0	0	0	0	0	0	0	0	0	0	1	1	3	2	3	0	0	0	0	0	0	0	0	0	0	0	0	0	0	0	0	0
k__Bacteria;p__Chlamydiae;c__Chlamydiia;o__Chlamydiales;f__Chlamydiaceae;g__Chlamydia;s__Chlamydia_psittaci	1461.38	1028.87	1413.91	1802.57	1418.98	1346.46	1334.35	1172.5	1596.92	1304.62	1429.39	1778.87	1557.07	1685.23	1312.44	1806.34	1258.01	1297.78	1595.31	1894.43	1424.75	1735.9	1130.58	1622.77	1630.42	1387.9	1605.93	1642.11	1390.61	1629.16	1267.69	1735.24	1834.67	1261.18	1437.47	1106.19	1083.65	1031.11	1445.5	896.543	1139.79	975.886	1544.65	1521.28	1209.43	1229.66	1301.48	1440.26
k__Bacteria;p__Chlamydiae;c__Chlamydiia;o__Chlamydiales;f__Chlamydiaceae;g__Chlamydia;s__Chlamydia_trachomatis	5025.78	15999.2	6422.93	7197.63	6083.51	5709.33	5744.23	5415.07	6755.31	5621.25	5725.49	9138.93	13766	7507.12	4973.77	6941.54	4204.99	6263.37	7682.07	7680.53	8707.54	7259.22	5807.75	7471.95	10378.5	9091.65	17708.1	6741.86	10159	6747.19	8377.6	9087.98	7675.35	6066.11	11032.4	5008.48	4903.68	14429.5	11749.6	4550.17	6418.57	4155.7	9443.49	5865.73	4598.56	6507.47	9421.56	6842.61
k__Bacteria;p__Chlamydiae;c__Chlamydiia;o__Chlamydiales;f__unclassified;g__unclassified;s__Chlamydiales_bacterium_SCGC_AG-110-M15	3	0	0	0	0	0	0	0	0	0	0	0	0	0	0	0	0	0	0	0	0	0	0	0	0	0	1	2	0	0	2	0	0	0	0	0	0	0	0	0	0	0	0	0	0	0	0	0
k__Bacteria;p__Chlamydiae;c__Chlamydiia;o__Parachlamydiales;f__Parachlamydiaceae;g__Candidatus_Protochlamydia;s__Candidatus_Protochlamydia_amoebophila	0	0	1	0	0	0	0	0	0	0	0	0	0	0	0	0	0	0	0	0	0	0	0	0	0	0	1	3	0	1	0	0	0	0	0	0	0	0	0	0	0	0	0	0	0	0	0	0
k__Bacteria;p__Chlamydiae;c__Chlamydiia;o__Parachlamydiales;f__Parachlamydiaceae;g__Neochlamydia;s__Neochlamydia_sp._EPS4	0	0	0	0	0	0	0	0	0	0	0	0	0	0	0	0	0	0	0	0	0	0	0	0	0	0	4	2	0	2	1	0	0	0	0	0	0	0	0	0	0	0	0	0	0	0	0	0
k__Bacteria;p__Chlamydiae;c__Chlamydiia;o__Parachlamydiales;f__Parachlamydiaceae;g__Parachlamydia;s__Parachlamydia_acanthamoebae	1	0	1	0	0	0	0	0	0	0	0	0	0	0	0	0	0	0	0	0	0	0	0	0	3	0	5	0	1	0	0	0	0	0	0	0	0	0	0	0	0	0	0	0	0	0	0	0
k__Bacteria;p__Chlamydiae;c__Chlamydiia;o__Parachlamydiales;f__Parachlamydiaceae;g__Parachlamydia;s__Parachlamydia_sp.	3	0	3	0	0	0	0	0	0	0	0	0	0	0	0	0	0	0	0	0	0	0	0	0	8	0	6	6	5	5	4	0	0	0	0	0	0	0	0	0	0	0	0	0	0	0	0	0
k__Bacteria;p__Chlamydiae;c__Chlamydiia;o__Parachlamydiales;f__Parachlamydiaceae;g__unclassified;s__Parachlamydiaceae_bacterium	0	0	0	0	0	0	0	0	0	0	0	0	0	0	0	0	0	0	0	0	0	0	0	0	0	0	1	0	0	0	5	0	0	0	0	0	0	0	0	0	0	0	0	0	0	0	0	0
k__Bacteria;p__Chlamydiae;c__Chlamydiia;o__Parachlamydiales;f__Waddliaceae;g__Waddlia;s__Waddlia_chondrophila	77.214	29	55.679	82.483	85.142	117.952	79.056	47.593	29.44	38.511	36.591	32	30.003	35.745	66.782	49.457	118.338	109.495	51.363	28.682	51.564	52.304	90.244	32.883	34.267	39.686	29	33.53	67.475	44.704	96.448	24.72	47.493	31.624	20.206	59.344	42.532	19.438	90.995	56.101	27.277	34.116	59.723	47.669	58.42	53.44	24.678	37.765
k__Bacteria;p__Chlamydiae;c__Chlamydiia;o__Parachlamydiales;f__unclassified;g__unclassified;s__Parachlamydiales_bacterium	0	0	0	0	0	0	0	0	0	0	0	0	0	0	0	0	0	0	0	0	0	0	0	0	1	0	8	4	1	2	3	0	0	0	0	0	0	0	0	0	0	0	0	0	0	0	0	0
k__Bacteria;p__Chlamydiae;c__unclassified;o__unclassified;f__unclassified;g__unclassified;s__Chlamydiae_bacterium	0	0	3	0	0	0	0	0	0	0	0	0	0	0	0	0	0	0	0	0	0	0	0	0	7.776	0	3.735	4.38	0	3	6	0	0	0	0	0	0	0	0	0	0	0	0	0	0	0	0	0
k__Bacteria;p__Chlorobi;c__Chlorobia;o__Chlorobiales;f__Chlorobiaceae;g__Chlorobaculum;s__Chlorobaculum_tepidum	0	0	0	0	0	0	0	0	0	0	0	0	0	0	0	0	0	0	0	0	0	0	0	0	0	0	0	0	0	0	0	0	0	1	3	0	0	0	0	0	0	0	0	0	0	0	0	0
k__Bacteria;p__Chlorobi;c__Chlorobia;o__Chlorobiales;f__unclassified;g__unclassified;s__Chlorobiales_bacterium	0	0	0	0	0	0	0	0	0	0	0	0	0	0	0	0	0	0	0	0	0	0	0	0	0	0	0	0	0	0	0	0	4	2.543	2	6	3	0	0	0	0	0	0	0	0	0	0	0
k__Bacteria;p__Chlorobi;c__unclassified;o__unclassified;f__unclassified;g__unclassified;s__Chlorobi_bacterium_OLB7	0	0	0	0	0	0	0	0	0	0	0	0	0	0	0	0	0	0	0	0	0	0	0	0	1	0	0	0	0	0	3	0	0	0	0	0	0	0	0	0	0	0	0	0	0	0	0	0
k__Bacteria;p__Chloroflexi;c__Anaerolineae;o__Anaerolineales;f__Anaerolineaceae;g__unclassified;s__Anaerolineaceae_bacterium	3	0	0	3	0	0	0	2	0	0	0	0	0	1	0	1	0	0	0	1	0	0	0	0	0	0	0	0	0	0	2	0	0	0	0	2	0	0	0	0	0	1	0	0	0	0	1	0
k__Bacteria;p__Chloroflexi;c__Anaerolineae;o__Anaerolineales;f__Anaerolineaceae;g__unclassified;s__Anaerolineaceae_bacterium_4572_78	0	0	0	0	0	0	0	0	0	0	0	0	1	1	0	0	0	2	0	0	0	0	0	0	0	0	0	0	3	0	0	4	0	0	2	0	0	0	0	0	0	0	0	0	0	0	0	0
k__Bacteria;p__Chloroflexi;c__Anaerolineae;o__Anaerolineales;f__unclassified;g__unclassified;s__Anaerolineales_bacterium	2	0	1	0	0	0	0	0	0	0	0	0	0	0	0	0	0	0	0	0	0	0	0	0	1	0	7	2	1	1	3	0	0	0	0	0	0	0	0	0	0	0	0	0	0	0	0	0
k__Bacteria;p__Chloroflexi;c__Anaerolineae;o__unclassified;f__unclassified;g__unclassified;s__Anaerolineae_bacterium	8	1	13.187	0	2	2	5	0	4	0	0	3	0	0	4	1	3	4	1	3	2	1	6	4	9.447	3	7.271	7	6	10	8.268	0	4	1	0	0	4	1	2	0	1	0	6	2	0	2	0	2
k__Bacteria;p__Chloroflexi;c__Anaerolineae;o__unclassified;f__unclassified;g__unclassified;s__Anaerolineae_bacterium_UTCFX5	0	3	2	0	0	0	0	0	0	0	0	1	0	0	0	0	1	0	0	0	0	0	0	0	0	0	1	0	0	1	0	0	0	0	0	0	3	0	0	0	0	0	0	1	0	2	2	1
k__Bacteria;p__Chloroflexi;c__Anaerolineae;o__unclassified;f__unclassified;g__unclassified;s__anaerobic_bacterium_MO-CFX2	4	0	4	0	0	0	0	0	0	0	0	0	0	0	0	0	0	0	0	0	0	0	0	0	16	0	14	15	7	13	6	0	0	0	0	0	0	0	0	0	0	0	0	0	0	0	0	0
k__Bacteria;p__Chloroflexi;c__Ardenticatenia;o__Ardenticatenales;f__Ardenticatenaceae;g__Ardenticatena;s__Ardenticatena_maritima	2	0	4	0	0	0	0	0	0	0	0	0	0	0	0	0	0	0	0	0	0	0	0	0	6.455	0	3	8	8.771	3	7	0	0	0	0	0	0	0	0	0	0	0	0	0	0	0	0	0
k__Bacteria;p__Chloroflexi;c__Caldilineae;o__Caldilineales;f__Caldilineaceae;g__unclassified;s__Caldilineaceae_bacterium_SB0661_bin_32	0	0	1	0	0	0	0	0	0	0	0	0	0	0	0	0	0	0	0	0	0	0	0	0	4.448	0	3.63	4.262	0.114	3.266	3.452	0	0	0	0	0	0	0	0	0	0	0	0	0	0	0	0	0
k__Bacteria;p__Chloroflexi;c__Caldilineae;o__unclassified;f__unclassified;g__unclassified;s__Caldilineae_bacterium	1	0	1	0	0	0	0	0	0	0	0	0	0	0	0	0	0	0	0	0	0	0	0	0	9.545	0	6	3	3.229	2	4	0	0	0	0	0	0	0	0	0	0	0	0	0	0	0	0	0
k__Bacteria;p__Chloroflexi;c__Candidatus_Thermofonsia;o__unclassified;f__unclassified;g__unclassified;s__Candidatus_Thermofonsia_Clade_1_bacterium	2.628	0	1.414	0	0	0	0	0	0	0	0	0	0	0	0	0	0	0	0	0	0	0	0	0	1	0	4	3.422	5.625	5	1	0	0	0	0	0	0	0	0	0	0	0	0	0	0	0	0	0
k__Bacteria;p__Chloroflexi;c__Chloroflexia;o__Chloroflexales;f__Chloroflexaceae;g__unclassified;s__Chloroflexaceae_bacterium	1	0	0	0	0	0	0	0	0	0	0	0	0	0	0	0	0	0	0	0	0	0	0	0	3.831	0	2	4	3	1	0	0	0	0	0	0	0	0	0	0	0	0	0	0	0	0	0	0
k__Bacteria;p__Chloroflexi;c__Chloroflexia;o__Chloroflexales;f__Roseiflexaceae;g__Kouleothrix;s__Kouleothrix_aurantiaca	0	0	0	0	1	0	1	0	0	2	0	0	2	4	3	0	1	0	0	0	0	0	1	0	0	1	1	0	0	2	2	0	0	1	0	0	0	1	0	0	0	0	1	0	0	0	0	0
k__Bacteria;p__Chloroflexi;c__Chloroflexia;o__Herpetosiphonales;f__Herpetosiphonaceae;g__unclassified;s__Herpetosiphonaceae_bacterium	3	2	0	1	1	3	2	0	1	0	2	8	2.015	1	0	5	0	1	1	4	1	1	0	8	1	1	0	1	1	0	0	0	0	3	1	2	1	3	0	0	1	1	0	10	2	1	2	1
k__Bacteria;p__Chloroflexi;c__Dehalococcoidia;o__unclassified;f__unclassified;g__unclassified;s__Dehalococcoidia_bacterium	61	7	80	2	3	2	0	4	2	2	2	0	5	3	0	1	1	3	0	0	3	8	3	1	156.519	0	139.659	95	106	133.205	121	2	1	0	2	1	3	0	3	1	0	0	2	2	2	0	0	2
k__Bacteria;p__Chloroflexi;c__Ktedonobacteria;o__Ktedonobacterales;f__Dictyobacteraceae;g__Dictyobacter;s__Dictyobacter_aurantiacus	0	0	3	0	0	0	0	0	0	0	0	0	0	0	0	0	0	0	0	0	0	0	0	0	4	0	4	7	4	4	5	0	0	0	0	0	0	0	0	0	0	0	0	0	0	0	0	0
k__Bacteria;p__Chloroflexi;c__Ktedonobacteria;o__Ktedonobacterales;f__Dictyobacteraceae;g__Dictyobacter;s__Dictyobacter_sp._Uno17	1.19	0	0	0	0	0	0	0	0	0	0	0	0	0	0	0	0	0	0	0	0	0	0	0	4	0	2	1	2	0	5.591	0	0	0	0	0	0	0	0	0	0	0	0	0	0	0	0	0
k__Bacteria;p__Chloroflexi;c__Ktedonobacteria;o__Ktedonobacterales;f__Ktedonobacteraceae;g__Ktedonobacter;s__Ktedonobacter_sp.	1.07	0	3	0	0	0	0	0	0	0	0	0	0	0	0	0	0	0	0	0	0	0	0	0	13.446	0	19	11.209	4	5	6.977	0	0	0	0	0	0	0	0	0	0	0	0	0	0	0	0	0
k__Bacteria;p__Chloroflexi;c__Ktedonobacteria;o__Ktedonobacterales;f__Ktedonobacteraceae;g__unclassified;s__Ktedonobacteraceae_bacterium	3	0	2	0	0	0	0	0	0	0	0	0	0	0	0	0	0	0	0	0	0	0	0	0	15	0	12.643	8	1	9.422	7	0	0	0	0	0	0	0	0	0	0	0	0	0	0	0	0	0
k__Bacteria;p__Chloroflexi;c__unclassified;o__unclassified;f__unclassified;g__unclassified;s__Chloroflexi_bacterium	246.454	65.945	328.048	239.594	441.676	577.635	300.839	142.502	98.722	184.999	175.733	29.279	78.385	64.97	282.89	96.549	768.63	489.85	397.775	114.527	64.514	87.312	376.836	64.865	157.372	149.767	169.031	100.01	448.546	167.079	375.067	66.713	78.508	69.464	42.538	219.832	95.711	27.103	463.643	254.667	49.89	60.726	191.017	55.398	200.578	131.309	34.508	53.149
k__Bacteria;p__Chloroflexi;c__unclassified;o__unclassified;f__unclassified;g__unclassified;s__Chloroflexi_bacterium_13_1_40CM_2_68_14	0	0	0	0	4	0	0	0	0	0	0	0	0	0	0	1	0	1	0	0	0	0	0	1	2	0	0	0	0	1	1	1	0	0	0	0	0	0	0	0	0	0	0	0	0	2	1	3
k__Bacteria;p__Chloroflexi;c__unclassified;o__unclassified;f__unclassified;g__unclassified;s__Chloroflexi_bacterium_54-19	1	0	1	0	0	0	0	0	0	0	0	0	0	0	0	0	0	0	0	0	0	0	0	0	3.637	0	3	0	2	6	0.023	0	0	0	0	0	0	0	0	0	0	0	0	0	0	0	0	0
k__Bacteria;p__Chloroflexi;c__unclassified;o__unclassified;f__unclassified;g__unclassified;s__Chloroflexi_bacterium_RBG_13_68_17	0	0	0	0	0	0	0	0	0	0	1	0	0	0	1	3	1	0	0	0	0	0	1	0	0	0	0	0	0	0	0	0	0	0	0	0	0	0	0	0	0	0	0	0	0	0	0	0
k__Bacteria;p__Chloroflexi;c__unclassified;o__unclassified;f__unclassified;g__unclassified;s__SAR202_cluster_bacterium	3	0	0	0	0	0	0	0	0	0	0	0	0	0	0	0	0	0	0	0	0	0	0	0	0	0	1	0	1	0	1	0	0	0	0	0	0	0	0	0	0	0	0	0	0	0	0	0
k__Bacteria;p__Chloroflexi;c__unclassified;o__unclassified;f__unclassified;g__unclassified;s__SAR202_cluster_bacterium_Io17-Chloro-G7	1	0	1	0	0	0	0	0	0	0	0	0	0	0	0	0	0	0	0	0	0	0	0	0	2	0	2	1	0	4	0	0	0	0	0	0	0	0	0	0	0	0	0	0	0	0	0	0
k__Bacteria;p__Cyanobacteria;c__Gloeobacteria;o__Gloeobacterales;f__Gloeobacteraceae;g__Gloeobacter;s__Gloeobacter_violaceus	0	0	0	0	1	0	0	0	0	5	0	0	0	0	0	0	0	0	0	0	0	0	0	0	0	0	1	0	0	1	0	0	0	0	1	0	0	0	0	0	0	0	0	0	0	0	1	0
k__Bacteria;p__Cyanobacteria;c__Oscillatoriophycideae;o__Chroococcales;f__Aphanothecaceae;g__Aphanothece;s__Aphanothece_hegewaldii	396.112	282.333	341.645	355.954	359.208	336.98	361.145	381.513	357.507	316.855	403.554	441.142	439.643	520.284	327.701	456.822	325.518	371.066	437.088	546.59	473.326	584.074	235.029	441.172	434.576	500.436	411.996	423.644	580.609	438.755	278.696	474.258	451.361	350.974	299.712	304.975	275.104	252.182	344.254	228.436	332.21	287.222	471.021	422.167	307.085	274.433	372.215	333.723
k__Bacteria;p__Cyanobacteria;c__Oscillatoriophycideae;o__Chroococcales;f__Aphanothecaceae;g__Crocosphaera;s__Crocosphaera_chwakensis	325.37	238.969	305.143	349.89	305.905	288.451	319.508	271.298	320.905	317.929	286.066	330.026	342.862	376.135	253.383	364.401	251	307.205	323.536	384.529	332.735	326.896	242.691	328.564	317.41	289.056	344.016	387.264	283.969	395.598	279.688	379.936	409.23	300.505	267.292	246.101	261.495	212.634	302.659	230.184	222.945	201.236	290.91	350.917	250.025	236.804	289.797	301.542
k__Bacteria;p__Cyanobacteria;c__Oscillatoriophycideae;o__Chroococcales;f__Aphanothecaceae;g__Euhalothece;s__Euhalothece_sp._KZN_001	1	0	0	0	0	0	0	0	0	0	0	0	0	0	0	0	0	0	0	0	0	0	0	0	2	0	8	2	2.383	0	4.45	0	0	0	0	0	0	0	0	0	0	0	0	0	0	0	0	0
k__Bacteria;p__Cyanobacteria;c__Oscillatoriophycideae;o__Chroococcales;f__Microcystaceae;g__Microcystis;s__Microcystis_aeruginosa	6	2	5	0	3	4	3	0	3	2	2	1	0	1	3	4	3	1	0	4	0	1	1	7	8	1	10.415	4	2	4	8.78	3	0	8	0	0	0	1	1	1	2	2	3	0	5	1	1	0
k__Bacteria;p__Cyanobacteria;c__Oscillatoriophycideae;o__Oscillatoriales;f__Coleofasciculaceae;g__Geitlerinema;s__Geitlerinema_sp._FC_II	0	0	0	0	0	0	0	0	0	0	0	0	0	0	0	0	0	0	0	0	0	0	0	0	0	0	1	4	3	4	7	0	0	0	0	0	0	0	0	0	0	0	0	0	0	0	0	0
k__Bacteria;p__Cyanobacteria;c__Oscillatoriophycideae;o__Oscillatoriales;f__Coleofasciculaceae;g__Geitlerinema;s__Geitlerinema_sp._PCC_7407	2	0	4	0	0	0	0	0	0	0	0	0	0	0	0	0	0	0	0	0	0	0	0	0	10	0	7	2	3	9.226	10.376	0	0	0	0	0	0	0	0	0	0	0	0	0	0	0	0	0
k__Bacteria;p__Cyanobacteria;c__Oscillatoriophycideae;o__Oscillatoriales;f__Coleofasciculaceae;g__Roseofilum;s__Roseofilum_reptotaenium	0	1	0	0	0	0	0	0	0	0	0	0	3	0	0	0	0	0	0	0	0	0	0	0	0	0	0	0	1	0	0	0	0	0	0	0	0	0	2	0	1	0	4	0	0	0	0	0
k__Bacteria;p__Cyanobacteria;c__Oscillatoriophycideae;o__Oscillatoriales;f__Coleofasciculaceae;g__unclassified;s__Coleofasciculaceae_cyanobacterium_RL_1_1	8	0	4	0	0	0	0	0	0	0	0	0	0	0	0	0	0	0	0	0	0	0	0	0	16	0	15	14	7	13	9	0	0	0	0	0	0	0	0	0	0	0	0	0	0	0	0	0
k__Bacteria;p__Cyanobacteria;c__Oscillatoriophycideae;o__Oscillatoriales;f__Cyanothecaceae;g__Cyanothece;s__Cyanothece_sp._UBA12306	0	0	0	0	0	0	0	0	0	0	0	0	0	0	0	0	0	0	0	0	0	0	0	0	0	0	0	0	0	3	1	0	0	0	0	0	0	0	0	0	0	0	0	0	0	0	0	0
k__Bacteria;p__Cyanobacteria;c__Oscillatoriophycideae;o__Oscillatoriales;f__Gomontiellaceae;g__Crinalium;s__Crinalium_epipsammum	0	0	0	0	0	0	0	0	0	0	0	0	0	0	0	0	0	0	0	0	0	0	0	0	0	0	0	0	0	0	0	1	1	3	0	4	0	0	0	0	0	0	0	0	0	0	0	0
k__Bacteria;p__Cyanobacteria;c__Oscillatoriophycideae;o__Oscillatoriales;f__Microcoleaceae;g__Kamptonema;s__Kamptonema_sp._PCC_6506	1	0	0	0	0	0	0	0	0	0	0	0	0	0	0	0	0	0	0	0	0	0	0	0	0	0	0	0	0	1	6	0	0	0	0	0	0	0	0	0	0	0	0	0	0	0	0	0
k__Bacteria;p__Cyanobacteria;c__Oscillatoriophycideae;o__Oscillatoriales;f__Microcoleaceae;g__Kamptonema;s__Kamptonema_sp._SIO4C4	1	0	1	0	0	0	0	0	0	0	0	0	2	2	0	1	0	0	0	1	0	4	2	2	0	0	0	0	2	0	1	0	6	0	0	0	0	0	0	0	1	0	1	4	0	0	0	0
k__Bacteria;p__Cyanobacteria;c__Oscillatoriophycideae;o__Oscillatoriales;f__Microcoleaceae;g__Microcoleus;s__Microcoleus_sp._SIO2G3	1	0	0	0	0	0	0	0	0	0	0	0	0	0	0	0	0	0	0	0	0	0	0	0	2	0	1	3	3	1.292	2	0	0	0	0	0	0	0	0	0	0	0	0	0	0	0	0	0
k__Bacteria;p__Cyanobacteria;c__Oscillatoriophycideae;o__Oscillatoriales;f__Microcoleaceae;g__Microcoleus;s__uncultured_Microcoleus_sp.	0	0	0	0	0	0	0	0	0	0	0	0	0	0	0	0	0	0	0	0	0	0	0	0	9	0	9	3	5	3	9	0	0	0	0	0	0	0	0	0	0	0	0	0	0	0	0	0
k__Bacteria;p__Cyanobacteria;c__Oscillatoriophycideae;o__Oscillatoriales;f__Microcoleaceae;g__Planktothricoides;s__Planktothricoides_sp._SR001	4.773	0	6.704	0	0	0	0	0	0	0	0	0	0	1	0	0	0	0	0	0	0	0	0	0	8.656	0	17.297	4.817	5	6.367	6.115	0	0	0	0	0	0	0	0	0	0	0	0	0	0	0	0	0
k__Bacteria;p__Cyanobacteria;c__Oscillatoriophycideae;o__Oscillatoriales;f__Microcoleaceae;g__Planktothrix;s__Planktothrix_paucivesiculata	0	0	1	0	0	0	0	0	0	0	0	0	0	0	0	0	0	0	0	0	0	0	0	0	1	0	1	2	1	6	4	0	0	0	0	0	0	0	0	0	0	0	0	0	0	0	0	0
k__Bacteria;p__Cyanobacteria;c__Oscillatoriophycideae;o__Oscillatoriales;f__Microcoleaceae;g__Planktothrix;s__Planktothrix_prolifica	0	0	3	0	0	0	0	0	0	0	0	0	0	0	0	0	0	1	0	0	0	0	0	0	0	0	0	0	0	0	0	0	0	0	0	0	0	0	0	0	0	0	0	0	0	0	0	0
k__Bacteria;p__Cyanobacteria;c__Oscillatoriophycideae;o__Oscillatoriales;f__Microcoleaceae;g__Planktothrix;s__Planktothrix_sp._UBA10369	15.394	0	17.146	0	0	0	0	0	0	0	0	0	0	0	0	0	0	0	0	0	0	0	0	0	21.649	0	23.8	20.462	19.215	29.11	15.151	0	0	0	0	0	0	0	0	0	0	0	0	0	0	0	0	0
k__Bacteria;p__Cyanobacteria;c__Oscillatoriophycideae;o__Oscillatoriales;f__Microcoleaceae;g__Planktothrix;s__Planktothrix_tepida	3	0	4	0	0	0	0	1	0	0	0	0	0	0	0	0	0	0	1	1	1	0	0	0	4.167	0	6	6	6	9.96	5.396	0	1	0	0	0	4	0	0	0	0	0	0	0	0	1	0	0
k__Bacteria;p__Cyanobacteria;c__Oscillatoriophycideae;o__Oscillatoriales;f__Microcoleaceae;g__Symploca;s__Symploca_sp._SIO1A3	8	0	3	0	0	0	0	0	0	0	0	0	0	0	0	0	0	0	0	0	0	0	0	0	10.305	0	4	6	6.594	2	2.318	0	0	0	0	0	0	0	0	0	0	0	0	0	0	0	0	0
k__Bacteria;p__Cyanobacteria;c__Oscillatoriophycideae;o__Oscillatoriales;f__Microcoleaceae;g__Symploca;s__Symploca_sp._SIO1C4	1	0	3	0	0	0	0	0	0	0	0	0	0	0	0	0	0	0	0	0	0	0	0	0	4	0	0	5	0	0	3.555	0	0	0	0	0	0	0	0	0	0	0	0	0	0	0	0	0
k__Bacteria;p__Cyanobacteria;c__Oscillatoriophycideae;o__Oscillatoriales;f__Microcoleaceae;g__Symploca;s__Symploca_sp._SIO2B6	0	0	0	0	0	0	0	0	0	0	0	0	0	2	1	1	0	0	0	0	1	1	0	0	0	2	0	0	0	0	0	4	0	0	0	0	0	0	0	0	0	0	0	0	0	1	0	1
k__Bacteria;p__Cyanobacteria;c__Oscillatoriophycideae;o__Oscillatoriales;f__Oscillatoriaceae;g__Moorea;s__Moorea_sp._SIO3C2	0	0	2.976	0	0	0	0	0	0	0	0	0	0	0	0	0	0	0	0	0	0	0	0	0	23.265	0	10.148	3.836	10.451	14.577	16.258	0	0	0	0	0	0	0	0	0	0	0	0	0	0	0	0	0
k__Bacteria;p__Cyanobacteria;c__Oscillatoriophycideae;o__Oscillatoriales;f__Oscillatoriaceae;g__Moorea;s__Moorea_sp._SIO4G2	1	0	3	0	0	0	0	0	0	0	0	0	0	1	0	0	0	0	0	0	0	0	0	0	2.169	0	5	0	5	4	0	0	0	0	0	0	0	0	0	0	0	0	0	0	0	0	0	0
k__Bacteria;p__Cyanobacteria;c__Oscillatoriophycideae;o__Oscillatoriales;f__Oscillatoriaceae;g__Moorea;s__Moorea_sp._SIOASIH	3.894	0	1.226	0	0	0	0	0	0	0	0	0	0	0	0	0	0	0	0	0	0	0	0	0	0	0	0	6.217	0.028	0	0	0	0	0	0	0	0	0	0	0	0	0	0	0	0	0	0	0
k__Bacteria;p__Cyanobacteria;c__Oscillatoriophycideae;o__Oscillatoriales;f__Oscillatoriaceae;g__Okeania;s__Okeania_sp._SIO3B5	1	0	5	1	1	1	0	1	0	0	0	0	0	0	0	0	0	0	0	0	3	0	0	0	0	1	0	1	0	0	0	0	0	0	0	0	0	0	2	0	1	0	0	1	0	0	0	0
k__Bacteria;p__Cyanobacteria;c__Oscillatoriophycideae;o__Oscillatoriales;f__Oscillatoriaceae;g__Oscillatoria;s__Oscillatoria_sp._PCC_10802	0	0	0	0	0	0	0	0	0	0	0	0	0	0	0	0	0	0	0	0	0	0	0	0	4	0	1.267	4.212	2	2	1.403	0	0	0	0	0	0	0	0	0	0	0	0	0	0	0	0	0
k__Bacteria;p__Cyanobacteria;c__Oscillatoriophycideae;o__Oscillatoriales;f__Oscillatoriaceae;g__Phormidium;s__Phormidium_ambiguum	3	0	4	0	0	0	0	0	0	0	0	0	0	0	0	0	0	0	0	0	0	0	0	0	3	0	6	2	1	3	1	0	0	0	0	0	0	0	0	0	0	0	0	0	0	0	0	0
k__Bacteria;p__Cyanobacteria;c__Oscillatoriophycideae;o__Oscillatoriales;f__unclassified;g__unclassified;s__Oscillatoriales_cyanobacterium_MTP1	0	0	1	0	0	0	0	0	0	0	0	0	0	0	0	0	0	0	0	0	0	0	0	0	0	0	4	3	2	3.674	2	0	0	0	0	0	0	0	0	0	0	0	0	0	0	0	0	0
k__Bacteria;p__Cyanobacteria;c__Oscillatoriophycideae;o__Oscillatoriales;f__unclassified;g__unclassified;s__Oscillatoriales_cyanobacterium_USR001	1	0	4	0	0	0	0	0	0	0	0	0	0	0	0	0	0	0	0	0	0	0	0	0	11	0	8	3	4	4	4	0	0	0	0	0	0	0	0	0	0	0	0	0	0	0	0	0
k__Bacteria;p__Cyanobacteria;c__unclassified;o__Chroococcidiopsidales;f__Chroococcidiopsidaceae;g__Chroococcidiopsis;s__Chroococcidiopsis_sp._CCALA_051	0	0	0	0	0	0	0	0	0	0	0	0	0	0	0	0	0	0	0	0	0	0	0	0	1	0	7	5	2	3	2	0	0	0	0	0	0	0	0	0	0	0	0	0	0	0	0	0
k__Bacteria;p__Cyanobacteria;c__unclassified;o__Chroococcidiopsidales;f__Chroococcidiopsidaceae;g__Chroococcidiopsis;s__Chroococcidiopsis_thermalis	1	0	2	0	0	0	0	0	0	0	0	0	0	0	0	0	0	0	0	0	0	0	0	0	0	0	3	3	0	2	1	0	0	0	0	0	0	0	0	0	0	0	0	0	0	0	0	0
k__Bacteria;p__Cyanobacteria;c__unclassified;o__Gloeoemargaritales;f__Gloeomargaritaceae;g__Gloeomargarita;s__Gloeomargarita_lithophora	0	0	0	0	0	0	0	0	0	0	0	0	0	0	0	0	0	0	0	0	0	0	0	0	0	0	3	1	1	0	0	0	0	0	0	0	0	0	0	0	0	0	0	0	0	0	0	0
k__Bacteria;p__Cyanobacteria;c__unclassified;o__Nostocales;f__Aphanizomenonaceae;g__Aphanizomenon;s__Aphanizomenon_sp._UHCC_0183	0	0	2	0	0	0	0	0	0	0	0	0	0	0	0	0	0	0	0	0	0	0	0	0	3	0	6.192	3	5.404	1.535	0	0	0	0	0	0	0	0	0	0	0	0	0	0	0	0	0	0
k__Bacteria;p__Cyanobacteria;c__unclassified;o__Nostocales;f__Aphanizomenonaceae;g__Cuspidothrix;s__Cuspidothrix_issatschenkoi	6	0	2	1	0	0	0	0	0	1	0	0	0	1	0	0	1	1	0	0	0	1	0	0	1	0	3	7	2	0	4	1	1	1	0	6	1	0	0	0	1	0	0	0	0	0	0	0
k__Bacteria;p__Cyanobacteria;c__unclassified;o__Nostocales;f__Aphanizomenonaceae;g__Cylindrospermopsis;s__Cylindrospermopsis_raciborskii	2	0	1	0	0	0	0	0	0	0	0	0	0	0	0	0	0	0	0	0	0	0	0	0	2	0	2	1	1	3	0	0	0	0	0	0	0	0	0	0	0	0	0	0	0	0	0	0
k__Bacteria;p__Cyanobacteria;c__unclassified;o__Nostocales;f__Calotrichaceae;g__Calothrix;s__Calothrix_brevissima	0	0	0	0	0	0	0	0	0	0	0	0	0	0	0	0	0	0	0	0	0	0	0	0	0	0	3	1	0	0	1	0	0	0	0	0	0	0	0	0	0	0	0	0	0	0	0	0
k__Bacteria;p__Cyanobacteria;c__unclassified;o__Nostocales;f__Calotrichaceae;g__Calothrix;s__Calothrix_sp._NIES-4101	0	0	0	0	0	0	0	0	0	0	0	0	0	0	0	0	0	0	0	0	0	0	0	0	2	0	0	3	0	0	0	0	0	0	0	0	0	0	0	0	0	0	0	0	0	0	0	0
k__Bacteria;p__Cyanobacteria;c__unclassified;o__Nostocales;f__Chlorogloeopsidaceae;g__Chlorogloeopsis;s__Chlorogloeopsis_fritschii	1	0	1	0	0	0	0	0	0	0	0	0	0	0	0	0	0	0	0	0	0	0	0	0	0	0	1	0	3	0	3	0	0	0	0	0	0	0	0	0	0	0	0	0	0	0	0	0
k__Bacteria;p__Cyanobacteria;c__unclassified;o__Nostocales;f__Hapalosiphonaceae;g__Fischerella;s__Fischerella_sp._PCC_9605	1	0	1	0	0	0	0	0	0	0	0	0	0	0	0	0	0	0	0	0	0	0	0	0	8.438	0	5	3	3	1	3	0	0	0	0	0	0	0	0	0	0	0	0	0	0	0	0	0
k__Bacteria;p__Cyanobacteria;c__unclassified;o__Nostocales;f__Hapalosiphonaceae;g__Mastigocoleus;s__Mastigocoleus_testarum	1	0	1	0	0	0	0	0	0	0	0	0	0	0	0	0	0	0	0	0	0	0	0	0	6	0	4	3	1	5	6	0	0	0	0	0	0	0	0	0	0	0	0	0	0	0	0	0
k__Bacteria;p__Cyanobacteria;c__unclassified;o__Nostocales;f__Nostocaceae;g__Anabaena;s__Anabaena_sp._PCC_7108	0	0	0	0	0	0	0	0	0	0	0	0	0	0	0	0	0	0	0	0	0	0	0	0	0	0	3	1	2	1	2	0	0	0	0	0	0	0	0	0	0	0	0	0	0	0	0	0
k__Bacteria;p__Cyanobacteria;c__unclassified;o__Nostocales;f__Nostocaceae;g__Nostoc;s__Nostoc_calcicola	1	0	0	5	0	0	0	0	0	0	0	0	0	0	0	0	1	2	0	1	0	0	0	0	0	0	1	0	0	0	0	0	0	0	0	0	0	0	0	2	0	1	0	0	0	0	0	0
k__Bacteria;p__Cyanobacteria;c__unclassified;o__Nostocales;f__Nostocaceae;g__Nostoc;s__Nostoc_commune	0	0	0	0	0	0	0	0	0	0	0	0	0	0	0	0	0	0	0	0	0	0	0	0	0	0	0	0	0	4	1	0	0	0	0	0	0	0	0	0	0	0	0	0	0	0	0	0
k__Bacteria;p__Cyanobacteria;c__unclassified;o__Nostocales;f__Nostocaceae;g__Nostoc;s__Nostoc_sp._2RC	46.637	21	42	77	36	50	54	44	46	42	42	63	56	53	39	55.003	40	43.024	31	54.017	47.807	60	36	38	34	35	73	34	57	63.037	37	61.063	51.868	29	44.469	32	38	40	33	34	30	39	51	33.583	34	43	44	38
k__Bacteria;p__Cyanobacteria;c__unclassified;o__Nostocales;f__Nostocaceae;g__Nostoc;s__Nostoc_sp._C052	0	0	0	0	0	0	0	0	0	0	0	0	0	0	0	0	0	0	0	0	0	0	0	0	0	0	1	0	1	1	3	0	0	0	0	0	0	0	0	0	0	0	0	0	0	0	0	0
k__Bacteria;p__Cyanobacteria;c__unclassified;o__Nostocales;f__Nostocaceae;g__Nostoc;s__Nostoc_sp._T09	1	0	1	0	3	0	0	1	1	0	0	0	0	0	0	1	0	0	0	0	0	0	0	0	0	0	3	2	4	1	0	1	0	0	0	0	0	1	0	0	0	0	0	0	4	1	0	0
k__Bacteria;p__Cyanobacteria;c__unclassified;o__Nostocales;f__Nostocaceae;g__Nostoc;s__Nostoc_sp._UCD122	64.344	64.879	88.343	88.651	82.108	87.877	81.884	65.905	111.88	89.112	84.956	87.5	89.847	113.421	88.789	103.5	79.642	73.033	90.883	89.858	72.589	116.642	67.652	98.858	101.3	76.333	103.061	92.849	75.871	106.354	63.392	110.92	93.595	76.815	72.58	94.505	71.653	79.281	85.574	50.58	73.119	72.31	85.685	88.003	80.831	68.178	79.509	88.852
k__Bacteria;p__Cyanobacteria;c__unclassified;o__Nostocales;f__Nostocaceae;g__Richelia;s__Richelia_sp._CSU_2_1	6.36	0	14.558	0	0	0	0	0	0	0	0	0	0	0	0	0	0	0	0	0	0	0	0	0	15.529	0	30.185	11.88	21.332	20.267	11.323	0	0	0	0	0	0	0	0	0	0	0	0	0	0	0	0	0
k__Bacteria;p__Cyanobacteria;c__unclassified;o__Nostocales;f__Nostocaceae;g__Trichormus;s__Trichormus_variabilis	2	0	1	0	0	0	0	0	0	0	0	0	0	0	0	0	0	0	0	0	0	0	0	0	2.833	0	3	0	1	2	2	0	0	0	0	0	0	0	0	0	0	0	0	0	0	0	0	0
k__Bacteria;p__Cyanobacteria;c__unclassified;o__Nostocales;f__Scytonemataceae;g__Brasilonema;s__Brasilonema_bromeliae	0	0	3	0	0	0	0	0	0	0	0	0	0	0	0	0	0	0	0	0	0	0	0	0	0	0	1.733	2.788	0	0	4.597	0	0	0	0	0	0	0	0	0	0	0	0	0	0	0	0	0
k__Bacteria;p__Cyanobacteria;c__unclassified;o__Nostocales;f__Scytonemataceae;g__Scytonema;s__Scytonema_hofmannii	0	0	0	0	0	0	0	0	0	0	0	0	0	0	0	0	0	0	0	0	0	0	0	0	1.631	0	3	1	0	0	0	0	0	0	0	0	0	0	0	0	0	0	0	0	0	0	0	0
k__Bacteria;p__Cyanobacteria;c__unclassified;o__Nostocales;f__Scytonemataceae;g__Scytonema;s__Scytonema_sp._RU_4_4	0	3	0	0	0	0	0	0	0	2	0	0	0	1	0	0	0	0	0	0	1	0	1	1	3	0	0	0	0	0	1	2	0	0	0	0	0	1	0	0	0	3	0	0	0	0	0	0
k__Bacteria;p__Cyanobacteria;c__unclassified;o__Nostocales;f__Symphyonemataceae;g__Mastigocladopsis;s__Mastigocladopsis_repens	7	0	5	0	0	0	0	0	0	1	0	1	0	0	0	0	0	0	0	0	0	0	0	0	8.928	0	19	4.567	6	6	9	0	0	0	0	0	0	0	0	0	0	0	0	0	0	0	0	0
k__Bacteria;p__Cyanobacteria;c__unclassified;o__Nostocales;f__Tolypothrichaceae;g__Tolypothrix;s__Tolypothrix_sp._NQAIF319	1	0	0	0	0	0	0	0	0	0	0	0	0	0	0	0	0	0	0	0	0	0	0	0	1.436	0	1	1	1	2.443	0	0	0	0	0	0	0	0	0	0	0	0	0	0	0	0	0	0
k__Bacteria;p__Cyanobacteria;c__unclassified;o__Nostocales;f__Tolypothrichaceae;g__Tolypothrix;s__[Scytonema_hofmanni]_UTEX_B_1581	1	0	0	0	0	0	0	0	0	0	0	0	0	0	0	0	0	0	0	0	0	0	0	0	4	0	3	1	2	1	1	0	0	0	0	0	0	0	0	0	0	0	0	0	0	0	0	0
k__Bacteria;p__Cyanobacteria;c__unclassified;o__Pleurocapsales;f__Hyellaceae;g__Myxosarcina;s__Myxosarcina_sp._GI1	11	0	8	0	1	0	0	0	0	0	0	0	0	0	0	0	0	0	0	0	0	0	0	0	35	0	35	26	24	22	19	0	0	0	0	0	0	0	0	0	0	0	0	0	0	0	0	0
k__Bacteria;p__Cyanobacteria;c__unclassified;o__Pleurocapsales;f__Xenococcaceae;g__Xenococcus;s__Xenococcus_sp._PCC_7305	0	0	0	0	0	0	0	0	0	0	0	0	0	0	0	0	0	0	0	0	0	0	0	0	0	0	1	0	0	3	0	0	0	0	0	0	0	0	0	0	0	0	0	0	0	0	0	0
k__Bacteria;p__Cyanobacteria;c__unclassified;o__Spirulinales;f__Spirulinaceae;g__Spirulina;s__Spirulina_major	0	0	2	0	0	0	0	0	0	0	0	0	0	0	0	0	0	0	0	0	0	0	0	0	1	0	0	1	0	1	3	0	0	0	0	0	0	0	0	0	0	0	0	0	0	0	0	0
k__Bacteria;p__Cyanobacteria;c__unclassified;o__Spirulinales;f__Spirulinaceae;g__Spirulina;s__Spirulina_subsalsa	1	0	1	0	0	0	0	0	0	0	0	0	0	0	0	0	0	0	0	0	0	0	0	0	7	0	4	0	2	4	5	0	0	0	0	0	0	0	0	0	0	0	0	0	0	0	0	0
k__Bacteria;p__Cyanobacteria;c__unclassified;o__Synechococcales;f__Acaryochloridaceae;g__Acaryochloris;s__Acaryochloris_sp._SU_5_25	2	0	1	0	0	0	0	0	0	0	0	0	0	0	0	0	0	0	0	0	0	0	0	0	8	0	4	1	2	1	3	0	0	0	0	0	0	0	0	0	0	0	0	0	0	0	0	0
k__Bacteria;p__Cyanobacteria;c__unclassified;o__Synechococcales;f__Acaryochloridaceae;g__unclassified;s__Acaryochloridaceae_cyanobacterium_RU_4_10	0	0	0	0	0	0	0	0	0	0	0	0	0	0	0	0	0	0	0	0	0	0	0	0	0	0	1	0	0	0	6	0	0	0	0	0	0	0	0	0	0	0	0	0	0	0	0	0
k__Bacteria;p__Cyanobacteria;c__unclassified;o__Synechococcales;f__Leptolyngbyaceae;g__Alkalinema;s__Alkalinema_sp._RU_4_3	0	0	0	0	0	0	0	0	0	0	0	0	0	0	0	0	0	0	0	0	0	0	0	0	5	0	1	2	0	2	4	0	0	0	0	0	0	0	0	0	0	0	0	0	0	0	0	0
k__Bacteria;p__Cyanobacteria;c__unclassified;o__Synechococcales;f__Leptolyngbyaceae;g__Leptolyngbya;s__Leptolyngbya_sp._DLM2.Bin15	14.64	0	9.442	0	0	0	0	0	0	0	0	0	0	0	1	0	0	0	0	0	0	0	0	0	37.471	0	21.815	14.12	17.668	22.733	16.677	0	0	0	0	0	0	0	0	0	0	0	0	0	0	0	0	0
k__Bacteria;p__Cyanobacteria;c__unclassified;o__Synechococcales;f__Leptolyngbyaceae;g__Leptolyngbya;s__Leptolyngbya_sp._LCM1.Bin17	6	0	0	0	0	0	0	0	0	0	0	0	0	0	0	0	0	0	0	0	0	0	0	0	0	0	1.808	0	4.596	3.465	5	0	0	0	0	0	0	0	0	0	0	0	0	0	0	0	0	0
k__Bacteria;p__Cyanobacteria;c__unclassified;o__Synechococcales;f__Leptolyngbyaceae;g__Leptolyngbya;s__Leptolyngbya_sp._SIO1D8	1.227	0	11.296	0	0	0	0	0	0	0	0	0	0	0	0	0	0	0	0	0	0	0	0	0	15.344	0	9.299	11.183	3	9.633	8.885	0	0	0	0	0	0	0	0	0	0	0	0	0	0	0	0	0
k__Bacteria;p__Cyanobacteria;c__unclassified;o__Synechococcales;f__Leptolyngbyaceae;g__Phormidesmis;s__Phormidesmis_priestleyi	3	0	2	0	0	0	0	0	0	0	0	0	0	0	0	0	0	0	0	0	0	0	0	0	5	0	4	4	0	6.184	5.049	0	0	0	0	0	0	0	0	0	0	0	0	0	0	0	0	0
k__Bacteria;p__Cyanobacteria;c__unclassified;o__Synechococcales;f__Leptolyngbyaceae;g__Stenomitos;s__Stenomitos_frigidus	1	0	0	0	0	0	0	0	0	0	0	0	0	0	0	0	0	0	0	0	0	0	0	0	2	0	0	0	1	4	0	0	0	0	0	0	0	0	0	0	0	0	0	0	0	0	0	0
k__Bacteria;p__Cyanobacteria;c__unclassified;o__Synechococcales;f__Leptolyngbyaceae;g__unclassified;s__Leptolyngbyaceae_cyanobacterium_CSU_1_3	1	0	2	0	0	0	0	0	0	0	0	0	0	0	0	0	0	0	0	0	0	0	0	0	8	0	7	3	7	2	5	0	0	0	0	0	0	0	0	0	0	0	0	0	0	0	0	0
k__Bacteria;p__Cyanobacteria;c__unclassified;o__Synechococcales;f__Leptolyngbyaceae;g__unclassified;s__Leptolyngbyaceae_cyanobacterium_CSU_1_4	3	0	3	0	0	0	0	0	0	0	0	0	0	0	0	0	0	0	0	0	0	0	0	0	6.564	0	6	1	6	12	8	0	0	0	0	0	0	0	0	0	0	0	0	0	0	0	0	0
k__Bacteria;p__Cyanobacteria;c__unclassified;o__Synechococcales;f__Leptolyngbyaceae;g__unclassified;s__Leptolyngbyaceae_cyanobacterium_RM2_2_4	1	0	3	0	0	0	0	0	0	0	0	0	0	0	0	0	0	0	0	0	0	0	0	0	4	0	2	4.245	1	9	2	0	0	0	0	0	0	0	0	0	0	0	0	0	0	0	0	0
k__Bacteria;p__Cyanobacteria;c__unclassified;o__Synechococcales;f__Merismopediaceae;g__Aphanocapsa;s__Aphanocapsa_montana	4.07	0	1	0	0	0	0	0	0	0	0	0	0	0	0	0	0	0	0	0	0	0	0	0	10.451	0	14	12.541	7	4	13	0	0	0	0	0	0	0	0	0	0	0	0	0	0	0	0	0
k__Bacteria;p__Cyanobacteria;c__unclassified;o__Synechococcales;f__Merismopediaceae;g__Synechocystis;s__Synechocystis_sp._CACIAM_05	0	0	1	0	0	0	0	0	0	0	0	0	0	0	0	0	0	0	0	0	0	0	0	0	3	0	0	0	2	3	1	0	0	0	0	0	0	0	0	0	0	0	0	0	0	0	0	0
k__Bacteria;p__Cyanobacteria;c__unclassified;o__Synechococcales;f__Merismopediaceae;g__Synechocystis;s__Synechocystis_sp._PCC_7509	0	0	1	0	0	0	0	0	0	0	0	0	0	0	0	0	0	0	0	0	0	0	0	0	0	0	1	3	3	0	0	0	0	0	0	0	0	0	0	0	0	0	0	0	0	0	0	0
k__Bacteria;p__Cyanobacteria;c__unclassified;o__Synechococcales;f__Oculatellaceae;g__Thermoleptolyngbya;s__Thermoleptolyngbya_sp._PKUAC-SCTA183	0	0	1	0	0	0	0	0	0	0	0	0	0	0	0	0	0	0	0	0	0	0	0	0	7	0	5	6	3.13	4	3	0	0	0	0	0	0	0	0	0	0	0	0	0	0	0	0	0
k__Bacteria;p__Cyanobacteria;c__unclassified;o__Synechococcales;f__Prochloraceae;g__Prochlorococcus;s__Prochlorococcus_sp._MIT_0702	3	0	1	0	0	0	0	0	0	0	0	0	0	0	0	0	0	0	0	0	0	0	0	0	18	0	21	13	10	11	9	0	0	0	0	0	0	0	0	0	0	0	0	0	0	0	0	0
k__Bacteria;p__Cyanobacteria;c__unclassified;o__Synechococcales;f__Prochlorotrichaceae;g__Halomicronema;s__Halomicronema_hongdechloris	3	0	0	0	0	0	0	0	0	0	0	0	0	0	0	3	0	0	0	0	0	0	0	0	1	4	1	0	0	0	0	0	0	0	0	0	0	0	0	0	0	0	0	0	0	0	0	0
k__Bacteria;p__Cyanobacteria;c__unclassified;o__Synechococcales;f__Pseudanabaenaceae;g__Limnothrix;s__Limnothrix_rosea	2	0	1	0	0	0	0	0	0	0	0	0	0	0	0	0	0	0	0	0	0	0	0	0	1	0	8	0	2	1	2	0	0	0	0	0	0	0	0	0	0	0	0	0	0	0	0	0
k__Bacteria;p__Cyanobacteria;c__unclassified;o__Synechococcales;f__Pseudanabaenaceae;g__Pseudanabaena;s__Pseudanabaena_sp.	4	0	1.23	0	0	0	0	0	0	0	0	0	0	0	0	0	0	0	0	0	0	0	0	0	0	0	5	4	0	1.422	5.325	0	0	0	0	0	0	0	0	0	0	0	0	0	0	0	0	0
k__Bacteria;p__Cyanobacteria;c__unclassified;o__Synechococcales;f__Pseudanabaenaceae;g__Pseudanabaena;s__Pseudanabaena_sp._PCC_6802	0	0	8.77	0	0	0	0	0	0	0	0	0	0	0	0	0	0	0	0	0	0	0	0	0	16	0	9	0	7	9.578	7.675	0	0	0	0	0	0	0	0	0	0	0	0	0	0	0	0	0
k__Bacteria;p__Cyanobacteria;c__unclassified;o__Synechococcales;f__Pseudanabaenaceae;g__Pseudanabaena;s__Pseudanabaena_sp._PCC_7367	0	0	1.5	0	0	0	0	0	0	0	0	0	0	0	0	0	0	0	0	0	0	0	0	0	0	0	0	0	1	3	2	0	0	0	0	0	0	0	0	0	0	0	0	0	0	0	0	0
k__Bacteria;p__Cyanobacteria;c__unclassified;o__Synechococcales;f__Pseudanabaenaceae;g__Pseudanabaena;s__Pseudanabaena_sp._UWO310	3	0	3	0	2	0	0	2	0	0	0	0	0	0	0	2	2	0	2	0	0	0	0	0	0	0	0	0	1	0	0	0	7	0	0	0	1	0	0	0	0	0	1	0	0	0	0	0
k__Bacteria;p__Cyanobacteria;c__unclassified;o__Synechococcales;f__Synechococcaceae;g__Cyanobium;s__Cyanobium_sp.	9.606	0	9.854	0	0	0	0	0	0	0	0	0	0	0	0	0	0	0	0	0	0	0	0	0	27.351	0	18.2	29.538	19.785	8.89	18.849	0	0	0	0	0	0	0	0	0	0	0	0	0	0	0	0	0
k__Bacteria;p__Cyanobacteria;c__unclassified;o__Synechococcales;f__Synechococcaceae;g__Cyanobium;s__Cyanobium_sp._SAT1300	4	0	0	0	0	0	0	0	0	0	0	0	0	0	0	0	0	0	0	0	0	0	0	0	0	0	0	0	2	1	1	0	0	0	0	0	0	0	0	0	0	0	0	0	0	0	0	0
k__Bacteria;p__Cyanobacteria;c__unclassified;o__Synechococcales;f__Synechococcaceae;g__Synechococcus;s__Synechococcus_elongatus	0	0	1	0	0	0	0	0	0	0	0	0	0	0	0	0	0	0	0	0	0	0	0	0	2	0	2	1	0	3	5	0	0	0	0	0	0	0	0	0	0	0	0	0	0	0	0	0
k__Bacteria;p__Cyanobacteria;c__unclassified;o__Synechococcales;f__Synechococcaceae;g__Synechococcus;s__Synechococcus_sp.	2	0	0	0	0	0	0	0	0	0	0	0	0	0	0	0	0	0	0	0	0	0	0	0	6	0	6	1	0	2	2	0	0	0	0	0	0	0	0	0	0	0	0	0	0	0	0	0
k__Bacteria;p__Cyanobacteria;c__unclassified;o__Synechococcales;f__Synechococcaceae;g__Synechococcus;s__Synechococcus_sp._ARS1019	21.666	0	31.293	0	0	0	0	0	0	0	0	0	0	0	0	0	0	0	1	0	0	0	0	0	70.8	0	77.469	40.033	44.837	54.72	69.913	0	0	0	0	0	0	0	0	0	0	0	0	0	0	0	0	0
k__Bacteria;p__Cyanobacteria;c__unclassified;o__Synechococcales;f__Synechococcaceae;g__Synechococcus;s__Synechococcus_sp._N5	0	0	2	0	0	0	0	0	0	0	0	0	0	0	0	0	0	0	0	0	0	0	0	0	0	0	1	0	2	4	0	0	0	0	0	0	0	0	0	0	0	0	0	0	0	0	0	0
k__Bacteria;p__Cyanobacteria;c__unclassified;o__Synechococcales;f__Synechococcaceae;g__Synechococcus;s__Synechococcus_sp._TMED187	4.612	3	4	1	0	0	0	1	0	1	0	0	0	0	0	1	0	1	0	0	0	1	3	1	15.808	1	10.407	8.592	4.784	5.242	13.436	1	1	1	0	3	0	3	0	0	0	0	0	0	0	1	0	1
k__Bacteria;p__Cyanobacteria;c__unclassified;o__Synechococcales;f__Synechococcaceae;g__Thermosynechococcus;s__Thermosynechococcus_vulcanus	0	0	0	0	0	0	0	0	0	0	0	0	0	0	0	0	0	0	0	0	0	0	0	0	0	0	0	0	0	0	0	1	2	0	5	2	0	0	0	0	0	0	0	0	0	0	0	0
k__Bacteria;p__Cyanobacteria;c__unclassified;o__Synechococcales;f__Synechococcaceae;g__unclassified;s__Synechococcaceae_cyanobacterium_SM2_3_1	3.929	0	0	0	0	0	0	0	0	0	0	0	0	0	0	0	0	0	0	0	0	0	0	0	4	0	3	6	0	4	4	0	0	0	0	0	0	0	0	0	0	0	0	0	0	0	0	0
k__Bacteria;p__Cyanobacteria;c__unclassified;o__Synechococcales;f__unclassified;g__unclassified;s__Synechococcales_cyanobacterium_RM1_1_8	4.93	0	0	0	0	0	0	0	0	0	0	0	0	0	0	0	0	0	0	0	0	0	0	0	0.549	0	2	1.459	0	2	0	0	0	0	0	0	0	0	0	0	0	0	0	0	0	0	0	0
k__Bacteria;p__Cyanobacteria;c__unclassified;o__Synechococcales;f__unclassified;g__unclassified;s__uncultured_Synechococcales_cyanobacterium	1	0	0	0	0	0	0	0	0	0	0	0	0	0	0	0	0	0	0	0	0	0	0	0	3	0	4	1	2	1	1	0	0	0	0	0	0	0	0	0	0	0	0	0	0	0	0	0
k__Bacteria;p__Cyanobacteria;c__unclassified;o__unclassified;f__unclassified;g__unclassified;s__Cyanobacteria_bacterium_J069	0	0	0	0	0	0	0	0	0	0	0	0	0	0	0	0	0	0	0	0	0	0	0	0	0	0	3	0	0	0	0	0	0	0	0	0	0	0	0	0	0	0	0	0	0	0	0	0
k__Bacteria;p__Cyanobacteria;c__unclassified;o__unclassified;f__unclassified;g__unclassified;s__Cyanobacteria_bacterium_QS_1_48_34	7	0	11.484	0	0	0	0	0	0	1	0	0	0	0	0	0	0	0	0	0	0	0	0	0	16.652	0	19.746	12.316	5.385	13.099	10.168	0	0	0	0	0	0	0	0	0	0	0	0	0	0	0	0	0
k__Bacteria;p__Cyanobacteria;c__unclassified;o__unclassified;f__unclassified;g__unclassified;s__Cyanobacteria_bacterium_UBA11148	0	0	0	0	0	0	0	0	0	0	0	0	0	0	0	0	0	0	0	0	0	0	0	0	0	0	2	2	0	0	3	0	0	0	0	0	0	0	0	0	0	0	0	0	0	0	0	0
k__Bacteria;p__Cyanobacteria;c__unclassified;o__unclassified;f__unclassified;g__unclassified;s__Cyanobacteria_bacterium_UBA11149	1	0	2	0	0	0	0	0	0	0	0	0	0	0	0	0	0	0	0	0	0	0	0	0	7	0	1.237	1.563	3	0	0	0	0	0	0	0	0	0	0	0	0	0	0	0	0	0	0	0
k__Bacteria;p__Cyanobacteria;c__unclassified;o__unclassified;f__unclassified;g__unclassified;s__Cyanobacteria_bacterium_UBA11371	0	0	0	0	0	0	0	0	0	0	0	0	0	0	0	0	0	0	0	0	0	0	0	0	2	0	4	0	1	0	1	0	0	0	0	0	0	0	0	0	0	0	0	0	0	0	0	0
k__Bacteria;p__Cyanobacteria;c__unclassified;o__unclassified;f__unclassified;g__unclassified;s__Cyanobacteria_bacterium_UBA11372	4	0	2	0	0	0	0	0	0	0	0	0	0	0	0	0	0	0	0	0	0	0	0	0	11.221	0	6	5.358	3	6.198	5	0	0	0	0	0	0	0	0	0	0	0	0	0	0	0	0	0
k__Bacteria;p__Cyanobacteria;c__unclassified;o__unclassified;f__unclassified;g__unclassified;s__Cyanobacteria_bacterium_UBA8553	3	0	7	0	0	0	0	0	0	0	0	0	0	0	0	0	0	0	0	0	0	0	0	0	5	0	4	1	4	6.708	1	0	0	0	0	0	0	0	0	0	0	0	0	0	0	0	0	0
k__Bacteria;p__Cyanobacteria;c__unclassified;o__unclassified;f__unclassified;g__unclassified;s__Cyanobacteria_bacterium_WB6_1B_304	0	0	0	0	0	0	0	0	0	0	0	0	0	0	0	0	0	0	0	0	0	0	0	0	2.072	0	3	4.188	4	0	1	0	0	0	0	0	0	0	0	0	0	0	0	0	0	0	0	0
k__Bacteria;p__Cyanobacteria;c__unclassified;o__unclassified;f__unclassified;g__unclassified;s__cyanobacterium_G8-9	492.796	295.968	448.259	506.408	417.064	470.731	440.894	402.29	420.346	428.295	449.329	525.109	423.809	493.931	387.696	534.477	400.682	417.242	486.677	561.46	413.308	482.304	314.072	491.68	404.622	393.171	456.21	505.339	377.818	505.813	394.265	507.62	605.827	412.275	465.209	385.438	361.464	310.833	424.459	286.173	351.02	325.373	483.581	457.714	365.049	369.883	399.509	434.914
k__Bacteria;p__Cyanobacteria;c__unclassified;o__unclassified;f__unclassified;g__unclassified;s__cyanobacterium_PCC_7702	8.607	0	4.565	0	0	0	0	0	0	0	0	0	0	0	0	0	0	0	0	0	0	0	0	0	20.655	0	13.763	5.523	11.426	7.381	15.106	0	0	0	0	0	0	0	0	0	0	0	0	0	0	0	0	0
k__Bacteria;p__Cyanobacteria;c__unclassified;o__unclassified;f__unclassified;g__unclassified;s__unicellular_cyanobacterium_SU3	0	0	0	0	0	0	0	0	0	0	0	0	0	0	0	0	0	0	0	0	0	0	0	0	0	0	0	0	0	0	0	4	2	2.204	4	7	7	0	0	0	0	0	0	0	0	0	0	0
k__Bacteria;p__Deinococcus-Thermus;c__Deinococci;o__Deinococcales;f__Deinococcaceae;g__Deinococcus;s__Deinococcus_alpinitundrae	0	0	0	0	0	0	0	0	1	0	0	0	0	0	0	0	0	0	0	0	0	0	1	0	1	0	3	0	0	0	2	0	1	0	0	0	0	0	0	0	0	0	0	2	0	0	1	3
k__Bacteria;p__Deinococcus-Thermus;c__Deinococci;o__Deinococcales;f__Deinococcaceae;g__Deinococcus;s__Deinococcus_budaensis	0	0	0	0	0	0	0	0	0	0	0	0	0	0	0	0	0	0	0	0	0	0	0	0	2	0	3	1	1.626	1	2	0	0	0	0	0	0	0	0	0	0	0	0	0	0	0	0	0
k__Bacteria;p__Deinococcus-Thermus;c__Deinococci;o__Deinococcales;f__Deinococcaceae;g__Deinococcus;s__Deinococcus_misasensis	2	0	4	0	0	0	0	0	0	0	0	0	0	0	0	0	0	0	0	0	0	0	0	0	3	0	6	5	2	7.715	4	0	0	0	0	0	0	0	0	0	0	0	0	0	0	0	0	0
k__Bacteria;p__Deinococcus-Thermus;c__Deinococci;o__Thermales;f__Thermaceae;g__Thermus;s__Thermus_tengchongensis	0	0	0	0	0	0	0	0	0	0	0	0	0	0	0	0	0	0	0	0	0	0	0	0	4	0	4	3.277	1	0	0	0	0	0	0	0	0	0	0	0	0	0	0	0	0	0	0	0
k__Bacteria;p__Elusimicrobia;c__unclassified;o__unclassified;f__unclassified;g__unclassified;s__Elusimicrobia_bacterium_CG_4_9_14_3_um_filter_62_55	0	0	0	0	0	0	0	0	0	0	0	0	0	0	0	0	0	0	0	0	0	0	0	0	0	0	3	0	0	2	0	0	0	0	0	0	0	0	0	0	0	0	0	0	0	0	0	0
k__Bacteria;p__Elusimicrobia;c__unclassified;o__unclassified;f__unclassified;g__unclassified;s__Elusimicrobia_bacterium_RIFOXYA2_FULL_58_8	0	5	1	3	1	0	0	0	0	2	0	0	0	0	0	0	1	0	2	0	0	1	1	1	0	0	0	1	0	1	0	0	0	2	0	1	1	0	0	1	0	0	0	0	0	0	0	0
k__Bacteria;p__Fibrobacteres;c__Fibrobacteria;o__Fibrobacterales;f__Fibrobacteraceae;g__Fibrobacter;s__Fibrobacter_sp.	0	0	1	0	0	0	0	0	0	0	0	0	0	0	0	0	0	0	0	0	0	0	0	0	1	0	0	2.568	0	0	2	0	0	0	0	0	0	0	0	0	0	0	0	0	0	0	0	0
k__Bacteria;p__Fibrobacteres;c__Fibrobacteria;o__Fibrobacterales;f__Fibrobacteraceae;g__Fibrobacter;s__Fibrobacter_succinogenes	3.963	2	3	3	0	2	0	0	1	0	0	0	1	4	0	0	0	1	0	4	1	3	0	0	0	1	1	0	2	0	0	0	0	0	0	0	0	2	0	0	0	0	1	0	0	0	0	0
k__Bacteria;p__Firmicutes;c__Bacilli;o__Bacillales;f__Alicyclobacillaceae;g__Alicyclobacillus;s__Alicyclobacillus_vulcanalis	3.899	0	3.525	0	0	0	0	0	0	0	0	0	0	0	0	0	0	0	0	0	0	0	0	0	3.688	0	9.184	1.556	1.556	2.8	7.263	0	0	0	0	0	0	0	0	0	0	0	0	0	0	0	0	0
k__Bacteria;p__Firmicutes;c__Bacilli;o__Bacillales;f__Alicyclobacillaceae;g__Effusibacillus;s__Effusibacillus_lacus	1	0	4	0	0	0	0	0	0	0	0	0	0	0	0	0	0	0	0	0	0	0	0	0	3.375	0	6	2	1.268	6	0	0	0	0	0	0	0	0	0	0	0	0	0	0	0	0	0	0
k__Bacteria;p__Firmicutes;c__Bacilli;o__Bacillales;f__Alicyclobacillaceae;g__Tumebacillus;s__Tumebacillus_permanentifrigoris	0	0	2	0	0	0	0	0	0	0	0	0	0	0	0	0	0	0	0	0	0	0	0	0	5	0	3	3	3	5	1.102	0	0	0	0	0	0	0	0	0	0	0	0	0	0	0	0	0
k__Bacteria;p__Firmicutes;c__Bacilli;o__Bacillales;f__Bacillaceae;g__Alkalihalobacillus;s__Alkalihalobacillus_pseudofirmus	2	0	3	0	0	0	0	0	0	0	0	0	0	0	0	0	0	0	0	0	0	0	0	0	6	0	2	2	1	2	5	0	0	0	0	0	0	0	0	0	0	0	0	0	0	0	0	0
k__Bacteria;p__Firmicutes;c__Bacilli;o__Bacillales;f__Bacillaceae;g__Anoxybacillus;s__Anoxybacillus_calidus	0	0	1	0	0	0	0	0	4	0	0	0	1	2	0	0	0	4	0	0	1	0	2	2	2	2	1	0	0	0	0	0	1	0	3	0	0	0	0	0	0	0	0	2	0	0	0	1
k__Bacteria;p__Firmicutes;c__Bacilli;o__Bacillales;f__Bacillaceae;g__Bacillus;s__Bacillus_aciditolerans	13	0	9	1	3	0	0	1	1	0	0	0	2	1	3	0	0	2	0	2	3	2	3	0	44.251	0	56.336	28	33.821	32.711	32.804	1.594	0	2	0	0	0	5	0	0	0	0	1	0	0	2	6	1
k__Bacteria;p__Firmicutes;c__Bacilli;o__Bacillales;f__Bacillaceae;g__Bacillus;s__Bacillus_aerius	0	0	0	0	0	0	0	0	0	0	0	0	0	0	0	0	0	0	0	0	0	0	0	0	0	0	0	0	0	0	0	0	0	0	0	0	0	0	0	0	0	0	0	0	4	0	0	0
k__Bacteria;p__Firmicutes;c__Bacilli;o__Bacillales;f__Bacillaceae;g__Bacillus;s__Bacillus_altitudinis	0	138.404	0	0	0	0	0	0	3	0	0	0	72.046	6	0	0	0	0	0	4	1	0	14.34	0	1	0	105.102	0	46	0	4.637	0	4	3	55.341	0	3	127.146	88	0	34.372	1	42	0	0	0	53.107	15.738
k__Bacteria;p__Firmicutes;c__Bacilli;o__Bacillales;f__Bacillaceae;g__Bacillus;s__Bacillus_amyloliquefaciens	0	0	0	0	0	0	1	0	0	0	1	1	3	1	0	0	2	0	1	4	0	0	2	1	1	0	0	0	0	0	0	1	0	0	4	0	0	0	0	2	1	0	0	0	0	1	0	1
k__Bacteria;p__Firmicutes;c__Bacilli;o__Bacillales;f__Bacillaceae;g__Bacillus;s__Bacillus_anthracis	4	0	3	6	4	0	5.551	7.901	7	0	3	2.384	5	3	4	2	5	4	4.481	11.945	1	2	3	4	2	3.168	5	4	5	6	0	8	4	6	6	4	2	1	8	3	5	5	7	1	1	1.5	4	5.994
k__Bacteria;p__Firmicutes;c__Bacilli;o__Bacillales;f__Bacillaceae;g__Bacillus;s__Bacillus_cereus	6047.52	4378.07	5767.18	7047.57	6227.16	5674.58	6148.74	4874.7	6341.1	5979.45	6132.16	7315.33	6306.76	7342.45	5322.6	7015.85	4972.04	5618.5	6617.01	7656.57	6293.08	7243.21	4882.36	6998.46	6408.9	5526.04	7067.28	6815.45	5820.1	6989.77	5592.8	7352.1	7296.82	5689.02	5486.71	4948.39	4964.52	4480.76	5885.11	4109.1	4909.41	4098.53	6896.36	6234.69	4872.39	5122.81	5617.97	6090.51
k__Bacteria;p__Firmicutes;c__Bacilli;o__Bacillales;f__Bacillaceae;g__Bacillus;s__Bacillus_coahuilensis	4	0	0	0	0	0	0	0	0	0	0	0	0	0	0	0	0	0	0	0	0	0	0	0	5	0	7.689	1.574	2	1	4	0	0	0	0	0	0	0	0	0	0	0	0	0	0	0	0	0
k__Bacteria;p__Firmicutes;c__Bacilli;o__Bacillales;f__Bacillaceae;g__Bacillus;s__Bacillus_licheniformis	44.229	33.304	44.253	57.056	66.938	47.48	42.131	46.006	42.837	33.279	60.191	42.602	51.213	49.792	52.418	65.085	32.204	38.84	70.261	41.037	52.601	59.613	45.555	38.418	60.783	58.222	67.64	53.113	37.776	77.394	65.232	52.425	65.894	46.104	60.498	50.244	36.61	35.281	51.884	41.029	25.106	40.565	66.29	63.158	39.92	53.988	61.648	59.437
k__Bacteria;p__Firmicutes;c__Bacilli;o__Bacillales;f__Bacillaceae;g__Bacillus;s__Bacillus_megaterium	15.088	7	28.381	23	20.436	20	25	27	12	24	28.971	31	22	32	25.429	28.628	20.144	25.191	26.149	23	30.334	30	11.706	20.37	24.036	22	31	21	17.189	24.75	14	21	33	21.101	20.342	23	17.623	17.333	27	20.403	23.333	15	12.052	28.368	14	25	19	16
k__Bacteria;p__Firmicutes;c__Bacilli;o__Bacillales;f__Bacillaceae;g__Bacillus;s__Bacillus_natronophilus	54.409	55.85	83.126	80.815	78.593	62.568	64.501	48.274	63.301	51.556	76.273	79.396	69.165	89.208	46.76	78.857	66.129	70.607	46.619	75.046	59.685	61.214	47.781	64.244	75.219	52.324	72.913	74.27	68	69.782	61.807	58.853	87.222	53.928	63.09	51.028	47.782	38.229	85.596	31.973	46.936	46.502	70.641	86.689	38.917	49.996	45.947	73.712
k__Bacteria;p__Firmicutes;c__Bacilli;o__Bacillales;f__Bacillaceae;g__Bacillus;s__Bacillus_paralicheniformis	444.069	332.432	387.576	481.453	401.042	340.81	417.608	344.482	390.814	371.933	347.773	374.441	391.676	455.99	325.745	462.671	344.193	396.043	386.864	485.643	396.474	480.873	323.373	433.904	404.022	394.79	492.411	507.013	374.609	462.111	375.075	430.296	447.382	387.519	357.876	349.708	302.881	267.965	387.972	247.073	303.37	248.098	439.438	423.714	337.044	338.86	375.026	460.718
k__Bacteria;p__Firmicutes;c__Bacilli;o__Bacillales;f__Bacillaceae;g__Bacillus;s__Bacillus_pseudomycoides	2413.36	1776.31	2317.44	2785.01	2368.9	2108.63	2339.59	1877.04	2383.39	2237.71	2335.98	2723.26	2548.31	2712.46	2214.41	2750.21	2110.78	2384.06	2509.03	2978.04	2340.95	2871.67	1888.15	2594.68	2657.15	2018.3	2716.49	2458.38	2212.58	2815.1	2214.72	2813.43	3037.71	2114	2182.8	1914.66	1823.08	1684.17	2321.74	1572.26	1961.57	1580.68	2607.8	2434.89	1979.95	2007.21	2209.42	2339.36
k__Bacteria;p__Firmicutes;c__Bacilli;o__Bacillales;f__Bacillaceae;g__Bacillus;s__Bacillus_sp._7504-2	0	0	1	0	0	0	0	0	0	0	0	0	0	0	0	0	0	0	0	0	0	0	0	0	5	0	1	1	4	2	4	0	0	0	0	0	0	0	0	0	0	0	0	0	0	0	0	0
k__Bacteria;p__Firmicutes;c__Bacilli;o__Bacillales;f__Bacillaceae;g__Bacillus;s__Bacillus_sp._AFS054943	183.054	137.544	198.031	219.899	199.022	222.471	187.216	159.137	230.602	185.345	157.589	202.311	201.181	211.097	176.385	195.073	146.117	191.024	190.029	220.905	199.723	207.24	126.942	240.667	206.919	177.591	233.91	236.81	172.112	239.61	135.997	231.837	231.332	200.188	193.727	153.72	147.641	141.82	177.354	128.617	171.993	97.438	253.984	189.416	161.612	179.278	188.958	188.571
k__Bacteria;p__Firmicutes;c__Bacilli;o__Bacillales;f__Bacillaceae;g__Bacillus;s__Bacillus_sp._FJAT-27245	0	0	0	0	0	0	0	6	0	0	0	0	0	0	0	0	0	1	0	0	0	0	0	0	0	0	0	0	0	0	0	0	0	0	0	0	0	0	1	1	0	0	0	0	0	0	0	4
k__Bacteria;p__Firmicutes;c__Bacilli;o__Bacillales;f__Bacillaceae;g__Bacillus;s__Bacillus_sp._SRB_28	0	0	1	2	2	0	1	0	0	1	0	0	0	0	1	0	0	0	0	1	5	0	0	0	0	0	0	0	0	2	0	0	1	0	1	0	2	0	0	0	0	0	0	0	2	0	0	0
k__Bacteria;p__Firmicutes;c__Bacilli;o__Bacillales;f__Bacillaceae;g__Bacillus;s__Bacillus_sp._SRB_336	13.242	4	14.259	11.021	5.683	9.866	10	7	6.606	6.101	12.091	13.318	6.511	9.892	5.145	8.426	3.35	9.396	17.767	7.023	6.01	7.699	7.435	9.239	8.539	16.712	19.063	2.232	4	14.646	4.568	10.157	17.623	8	5.417	6.643	7	2	13	4.479	4.084	8.553	16	12.225	7.178	4.08	6.327	10
k__Bacteria;p__Firmicutes;c__Bacilli;o__Bacillales;f__Bacillaceae;g__Bacillus;s__Bacillus_sp._VT-16-64	3	9	3	2	8	2	10	7	5	10	3	8	7	6	15	9	8	6	2	15	2	11	8	5	6	2	10	8	6	10	7	7	9	4	1	2	3	9	8	3	8	8	13	6	9	5	16	8
k__Bacteria;p__Firmicutes;c__Bacilli;o__Bacillales;f__Bacillaceae;g__Bacillus;s__Bacillus_stratosphericus	0	0	2	0	0	0	0	0	0	0	0	0	0	0	0	0	0	0	0	0	15.286	0	0	63.883	8	0	0	0	0	0	0	0	0	0	0	0	0	0	0	0	0	0	0	0	0	0	0	0
k__Bacteria;p__Firmicutes;c__Bacilli;o__Bacillales;f__Bacillaceae;g__Bacillus;s__Bacillus_subtilis	250.799	218.715	259.939	345.155	231.176	211.131	278.438	188.953	293.162	274.25	274.3	303.143	265.389	291.426	234.709	290.723	253.837	271.015	249.903	288.648	213.12	320.371	222.614	322.592	286.05	239.593	274.674	288.633	268.785	322.228	248.149	258.457	307.636	246.525	245.801	181.816	238.734	187.854	236.53	175.191	220.205	170.29	301.381	249.937	226.363	194.175	209.691	281.505
k__Bacteria;p__Firmicutes;c__Bacilli;o__Bacillales;f__Bacillaceae;g__Bacillus;s__Bacillus_tequilensis	922.153	772.195	922.727	1201.89	987.704	977.538	970.467	969.383	1057.02	887.474	1019.34	1168.13	1140.81	1195.24	854.76	1176.04	832.644	884.839	1061.12	1226.36	945.608	1215.83	741.53	1111.88	1050.54	916.515	1225.68	1087.97	1002.66	1170.55	860.851	1207.65	1298.41	1039.6	1213.29	786.262	785.214	701.014	986.746	661.045	796.431	673.553	1096.3	1165.18	844.64	824.628	938.45	1047.77
k__Bacteria;p__Firmicutes;c__Bacilli;o__Bacillales;f__Bacillaceae;g__Bacillus;s__Bacillus_thuringiensis	10134.3	7704.47	9846.28	11473.2	10311.9	10182.1	10191.5	8907.27	9667.58	9993.97	9005.51	11251.4	10012.4	11466.4	8701	10574.5	9125.64	9612.11	10761.9	11855.8	9750.7	10968.4	8030.1	10736.7	10495.5	9563.48	10602.5	10639.9	9806.66	11070.4	9298.19	11527.6	12298.7	8600.61	8653.09	8066.7	7836.49	6753.45	10584.9	6805.25	7567.01	6684.17	11090.7	10149.6	7858.37	8375.53	8606.28	9592.43
k__Bacteria;p__Firmicutes;c__Bacilli;o__Bacillales;f__Bacillaceae;g__Bacillus;s__Bacillus_toyonensis	335.939	236.563	323.332	424.091	316.241	334.924	351.713	281.762	334.911	359.064	319.306	376.063	353.79	439.308	286.341	450.871	303.282	335.321	373.828	435.886	354.449	400.437	311.451	363.567	390.465	268.179	390.954	354.244	337.582	428.771	331.455	395.544	398.506	333.273	300.158	300.632	306.326	259.969	306.661	213.53	254.9	201.153	409.593	371.118	278.006	318.87	307.552	299.324
k__Bacteria;p__Firmicutes;c__Bacilli;o__Bacillales;f__Bacillaceae;g__Bacillus;s__Bacillus_wiedmannii	6753.13	5339.01	6916.45	8262.91	6853.33	6795	6918.99	6277.71	7473.89	6749.99	6517.12	8023.05	7291.21	8364.55	5854.09	8333.08	5677.9	6579.38	7276.33	8952.17	6643.62	8075.16	5407.09	8070.44	7428.5	6481.92	7556.79	7777.85	6609.51	8184.83	6176.58	8115.69	8889.94	6290.14	6461.37	5592.62	5511.46	4980.94	6773.19	4660.8	5565.37	4700.24	7735.55	7287.95	5743.44	5888.2	6514.48	7264.6
k__Bacteria;p__Firmicutes;c__Bacilli;o__Bacillales;f__Bacillaceae;g__Fictibacillus;s__Fictibacillus_macauensis	0	0	0	0	0	0	0	0	0	0	0	0	0	0	0	0	0	0	0	0	0	0	0	0	0	0	0	0	0	0	0	0	1	1.798	6.126	0	0	0	0	0	0	0	0	0	0	0	0	0
k__Bacteria;p__Firmicutes;c__Bacilli;o__Bacillales;f__Bacillaceae;g__Gracilibacillus;s__Gracilibacillus_thailandensis	0	0	0	0	0	0	0	0	0	0	0	0	0	0	0	0	0	0	0	0	6.739	0	0	0	0	0	0	0	0	0	0	0	0	0	0	0	0	0	0	0	0	0	0	0	0	0	0	0
k__Bacteria;p__Firmicutes;c__Bacilli;o__Bacillales;f__Bacillaceae;g__Lentibacillus;s__Lentibacillus_sp._SSKP1-9	0	2	0	0	0	0	1	1	1	1	0	0	0	0	0	1	0	0	0	0	1	1	0	1	0	0	0	0	4	2	0	0	1	1	1	0	0	0	0	1	0	0	0	0	0	2	0	0
k__Bacteria;p__Firmicutes;c__Bacilli;o__Bacillales;f__Bacillaceae;g__Lysinibacillus;s__Lysinibacillus_chungkukjangi	0	0	0	0	0	0	0	0	0	1	0	0	0	0	0	0	0	0	0	1	0	0	0	0	1	0	0	1	0	0	0	1	0	0	0	4	0	1	0	0	1	1	0	2	0	0	0	0
k__Bacteria;p__Firmicutes;c__Bacilli;o__Bacillales;f__Bacillaceae;g__Paraliobacillus;s__Paraliobacillus_sp._PM-2	0	0	0	0	0	0	0	0	0	0	0	0	0	0	0	0	0	0	0	0	0	0	0	0	0	0	3	0	0	0	1	0	0	0	0	0	0	0	0	0	0	0	0	0	0	0	0	0
k__Bacteria;p__Firmicutes;c__Bacilli;o__Bacillales;f__Bacillaceae;g__Peribacillus;s__Peribacillus_simplex	2	0	0	0	0	0	4	0	0	1	0	2	0	3	1	0	0	0	0	0	0	0	0	0	0	0	0	0	0	0	0	0	0	1	0	0	1	0	0	0	0	0	0	0	0	2	1	0
k__Bacteria;p__Firmicutes;c__Bacilli;o__Bacillales;f__Bacillaceae;g__Pontibacillus;s__Pontibacillus_marinus	8	0	8	0	0	0	0	0	0	0	0	0	0	0	0	0	0	0	0	0	0	0	0	0	24	0	20	9	9	6	12	0	0	0	0	0	0	0	0	0	0	0	0	0	0	0	0	0
k__Bacteria;p__Firmicutes;c__Bacilli;o__Bacillales;f__Bacillaceae;g__Virgibacillus;s__Virgibacillus_indicus	0	0	0	0	0	0	0	0	1	2	2	1	1	0	0	0	0	0	0	4	0	1	0	1	0	0	1	0	0	4	1	1	0	0	1	0	0	0	0	0	1	0	0	0	0	1	0	0
k__Bacteria;p__Firmicutes;c__Bacilli;o__Bacillales;f__Bacillaceae;g__Virgibacillus;s__Virgibacillus_profundi	700.678	600.474	834.665	1000.14	801.599	793.719	816.68	776.69	764.729	750.321	784.403	900.676	813.802	963.322	752.051	940.411	596.327	672.54	779.921	912.262	790.985	888.186	616.966	846.711	840.919	769.381	878.91	874.619	850.249	936.225	659.751	887.64	980.482	672.978	740.031	656.663	625.441	520.426	942.688	528.454	591.766	510.442	921.722	785.347	681.08	627.028	723.546	800.546
k__Bacteria;p__Firmicutes;c__Bacilli;o__Bacillales;f__Listeriaceae;g__Listeria;s__Listeria_booriae	0	0	0	0	0	0	0	0	0	0	0	0	0	0	0	0	0	0	0	0	10	0	0	0	0	0	0	0	0	0	0	0	0	0	0	0	0	0	0	0	0	0	0	0	0	0	0	0
k__Bacteria;p__Firmicutes;c__Bacilli;o__Bacillales;f__Listeriaceae;g__Listeria;s__Listeria_monocytogenes	4341.87	3385.77	4426.91	5327.16	4588.26	4336.79	4457.96	3871.39	4630.32	4141.51	4395.92	4924.92	4549.1	5303.89	3740.65	5258.46	3756.95	4219.32	4713.36	5486.83	4278.14	5245.76	3455.98	4981.1	4824.25	4310.07	4956.64	5047.42	4343.88	5416.33	4140.96	5011.9	5660.75	3963.36	4179.45	3679.21	3534.56	3173.37	4462.37	3025.71	3718.28	3086.38	5060.12	4628.28	3730.33	3917.92	4084.28	4788.79
k__Bacteria;p__Firmicutes;c__Bacilli;o__Bacillales;f__Listeriaceae;g__Listeria;s__Listeria_welshimeri	33.406	39.234	56.328	17.282	50.247	44	76	34.342	42.882	82	51.298	78.804	41.047	63	18.892	37.991	22	30.686	78	67.456	66.809	61.323	36.823	73	24	48	46.67	36	100.423	57.249	31.286	78.007	45	48.374	41.28	53	39	20	60.981	57.876	16	50	59.938	52	36	27.221	38.273	41.012
k__Bacteria;p__Firmicutes;c__Bacilli;o__Bacillales;f__Paenibacillaceae;g__Brevibacillus;s__Brevibacillus_laterosporus	0	0	1.238	0	0	0	0	0	0	0	0	0	0	0	0	0	0	0	0	0	0	0	0	0	3	0	7	7	6	0	0	0	0	0	0	0	0	0	0	0	0	0	0	0	0	0	0	0
k__Bacteria;p__Firmicutes;c__Bacilli;o__Bacillales;f__Paenibacillaceae;g__Brevibacillus;s__Brevibacillus_sp._LEMMJ03	0	0	0	0	0	0	0	0	0	0	0	0	0	0	0	0	0	0	0	0	0	0	0	0	0	0	0	0	0	0	0	0	0	0	0	0	0	0	0	0	0	0	0	0	3	0	0	0
k__Bacteria;p__Firmicutes;c__Bacilli;o__Bacillales;f__Paenibacillaceae;g__Chengkuizengella;s__Chengkuizengella_sediminis	13	0	3.507	2	0	1	1	1	0	0	1	0	0	1	0	2	2	1	1	0	0	0	0	0	17.436	0	30.171	5.442	11.693	8.692	14.986	0	1	0	0	0	0	0	1	1	0	0	0	0	0	0	2	0
k__Bacteria;p__Firmicutes;c__Bacilli;o__Bacillales;f__Paenibacillaceae;g__Paenibacillus;s__Paenibacillus_amylolyticus	2559.15	1895.76	3335.83	4125.82	2844.1	3789.41	2744.42	2900.68	2690.09	3189.48	3084.4	3107.18	2715.03	3170.78	2135.99	3151.15	2296.91	2267.41	2500.42	3248.08	2643.39	3330.26	2569.06	4691.88	2847.32	2851.81	3108.34	3703.04	3026.1	3600.31	2210.13	3038.28	5467.58	3110.25	2155.34	3047.62	2076.63	2005.11	2817.56	2230.54	2167.8	2120.54	2718.83	2962.47	2949.44	2432.15	2263.01	3332.7
k__Bacteria;p__Firmicutes;c__Bacilli;o__Bacillales;f__Paenibacillaceae;g__Paenibacillus;s__Paenibacillus_azotifigens	3	0	0	0	0	0	0	0	0	0	0	0	0	0	0	0	0	0	0	0	0	0	0	0	2	0	4	1	3.141	4	1	0	0	0	0	0	0	0	0	0	0	0	0	0	0	0	0	0
k__Bacteria;p__Firmicutes;c__Bacilli;o__Bacillales;f__Paenibacillaceae;g__Paenibacillus;s__Paenibacillus_jilunlii	83.971	71.678	74.319	79.782	87.727	79.578	77.495	97.284	55.807	83.789	75.451	104.355	81.03	96.287	71.226	85.546	72.07	97.961	92.353	107.893	81.257	87.342	85.417	107.091	86.177	93.162	108.431	98.497	61.883	97.444	74.081	80.548	96.846	63.933	60.417	53.716	72.973	63.726	106.217	53.52	61.483	42.318	76.343	67.44	56.72	73.886	80.697	60.932
k__Bacteria;p__Firmicutes;c__Bacilli;o__Bacillales;f__Paenibacillaceae;g__Paenibacillus;s__Paenibacillus_lautus	1537.55	1214.59	1681.75	1758.09	1949.99	1868.7	2146.08	1852.99	2451.78	1866.42	1702.31	3039.97	2254.29	2137.21	1410.66	2460.68	1303.45	1258.29	2823.42	2871.25	1657.75	2077.08	1329.07	2999.92	1881.57	2057.05	2258.38	1827.2	1557.83	2835.52	1442.64	2742.97	2102.2	1479.81	1650.14	1523.58	1399.46	1312.48	2221.62	1067.64	1882.31	1328.54	1769.78	1722.73	1671.68	1447.08	1624.23	1889.04
k__Bacteria;p__Firmicutes;c__Bacilli;o__Bacillales;f__Paenibacillaceae;g__Paenibacillus;s__Paenibacillus_mesophilus	1	0	0	0	0	0	0	0	0	0	0	0	0	0	0	0	0	0	0	0	0	0	0	0	1	0	0	0	0	0	3	0	0	0	0	0	0	0	0	0	0	0	0	0	0	0	0	0
k__Bacteria;p__Firmicutes;c__Bacilli;o__Bacillales;f__Paenibacillaceae;g__Paenibacillus;s__Paenibacillus_odorifer	9572.56	8498.95	10696.7	11918.3	10678.6	10663.7	9689.1	10082.7	11989.9	10344.1	10234.1	12653.7	11449.3	12781.2	8624.68	12547.9	8043.99	8614.63	10649.7	13545.3	11059.9	13146.4	7602.13	12391.4	12282.3	9575.3	11420.6	11833.1	10803.5	12945.4	8960.3	11720	13391.7	9300.76	8983.86	8580.1	8142.43	7084.63	10364.6	6693.41	8929.26	7078.08	12081.1	10674.5	8468.03	9462.45	9934.79	11162.9
k__Bacteria;p__Firmicutes;c__Bacilli;o__Bacillales;f__Paenibacillaceae;g__Paenibacillus;s__Paenibacillus_pabuli	159.2	119.217	172.301	191.778	140.393	124.427	166.763	137.708	158.944	131.141	158.77	164.448	153.472	187.454	145.25	152.05	135.79	125.237	155.363	191.834	111.267	223.044	141.838	148.793	165.396	144.686	159.135	171.931	149.145	184.234	121.639	203.443	175.657	154.142	139.721	106.445	125.884	115.407	145.048	101.172	132.612	91.867	199.53	151.615	140.167	119.601	137.419	135.787
k__Bacteria;p__Firmicutes;c__Bacilli;o__Bacillales;f__Paenibacillaceae;g__Paenibacillus;s__Paenibacillus_polymyxa	0	0	2.729	0	0	0	0	0	0	0	0	0	0	0	0	0	0	0	0	0	0	0	0	0	1.684	0	2	1	1	0	5	0	0	0	0	0	0	0	0	0	0	0	0	0	0	0	0	0
k__Bacteria;p__Firmicutes;c__Bacilli;o__Bacillales;f__Paenibacillaceae;g__Paenibacillus;s__Paenibacillus_sp._FSL_H8-0259	26.815	12.407	12.868	33.232	23.305	14.707	17.592	9.005	21.893	18.65	9.6	22.664	26.02	26.092	28.118	24.147	15.708	23.998	31.738	27.275	20.169	21	20.763	11.963	22.491	14.164	28.639	24.21	23.989	27	23.407	13.679	41.024	11.809	16.192	24.669	21.877	9.127	8.264	14.991	22.822	14.227	25.984	20.378	16.552	20.629	15.241	15.754
k__Bacteria;p__Firmicutes;c__Bacilli;o__Bacillales;f__Paenibacillaceae;g__Paenibacillus;s__Paenibacillus_sp._FSL_H8-0548	37.164	26.642	22.545	38.335	35	33.026	24.736	25	29.204	22.375	25.338	22.519	34.178	25.822	20	42.462	23.062	27.501	31.973	42.493	32.391	45.815	21	30.23	30	24	37.82	33	25	40.533	28.087	48.451	35.353	34	22.298	27	23.182	21.122	23.483	15.214	9	33	40.493	51.967	39.6	28.716	22.149	46.148
k__Bacteria;p__Firmicutes;c__Bacilli;o__Bacillales;f__Paenibacillaceae;g__Paenibacillus;s__Paenibacillus_sp._IHB_B_3415	134.043	0	140	0	0	0	0	0	0	0	1	0	0	0	0	0	0	0	0	0	0	0	0	0	380.089	0	416.532	275.347	263.115	308.588	285.813	0	0	0	0	0	0	0	0	0	0	0	0	0	0	0	0	0
k__Bacteria;p__Firmicutes;c__Bacilli;o__Bacillales;f__Paenibacillaceae;g__Paenibacillus;s__Paenibacillus_sp._Y412MC10	0	0	0	0	0	0	0	0	0	0	0	0	0	0	0	0	0	0	0	0	6.261	0	0	0	0	0	0	0	0	0	0	0	0	0	0	0	0	0	0	0	0	0	0	0	0	0	0	0
k__Bacteria;p__Firmicutes;c__Bacilli;o__Bacillales;f__Paenibacillaceae;g__Paenibacillus;s__Paenibacillus_wynnii	3	0	1	0	0	0	0	0	0	0	0	0	0	0	0	0	0	0	0	0	0	0	0	0	2.322	0	7	2	0	3	5	0	0	0	0	0	0	0	0	0	0	0	0	0	0	0	0	0
k__Bacteria;p__Firmicutes;c__Bacilli;o__Bacillales;f__Planococcaceae;g__Planococcus;s__Planococcus_faecalis	0	0	0	0	0	0	0	0	0	0	0	0	0	0	0	0	0	0	0	0	0	0	0	0	0	0	0	0	0	0	0	0	0	3	0	0	0	0	0	0	0	0	0	0	0	0	0	0
k__Bacteria;p__Firmicutes;c__Bacilli;o__Bacillales;f__Planococcaceae;g__Sporosarcina;s__Sporosarcina_sp._EUR3_2.2.2	1	0	0	0	0	0	0	1	0	0	0	3	2	0	0	0	0	0	5	1	0	0	0	0	2	0	0	0	0	1	0	0	0	0	0	0	0	0	0	0	0	0	0	0	0	0	2	0
k__Bacteria;p__Firmicutes;c__Bacilli;o__Bacillales;f__Sporolactobacillaceae;g__Sporolactobacillus;s__Sporolactobacillus_sp._THM19-2	269.449	228.59	257.336	324.226	252.016	269.232	301.851	247.421	315.224	265.023	264.292	339.796	315.836	363.398	270.529	325.079	249.369	244.205	313.405	358.653	235.058	333.687	233.598	355.742	322.038	261.442	289.071	343.148	258.813	325.873	230.492	277.843	371.182	260.631	233.913	195.44	197.839	173.999	285.72	164.497	225.092	178.635	324.407	296.987	243.407	200.782	249.066	287.413
k__Bacteria;p__Firmicutes;c__Bacilli;o__Bacillales;f__Sporolactobacillaceae;g__Sporolactobacillus;s__Sporolactobacillus_sp._THM7-7	0	0	0	0	1	0	0	1	0	0	1	0	0	0	1	0	1	2	0	0	0	3	0	0	6	0	0	4	1	1	1	2	1	2.682	0	1	1	0	0	0	0	0	2	1	0	0	0	0
k__Bacteria;p__Firmicutes;c__Bacilli;o__Bacillales;f__Staphylococcaceae;g__Macrococcus;s__Macrococcus_caseolyticus	128.652	112.402	123.713	154.678	148.179	152.685	109.043	119.548	125.61	124.896	110.224	135.484	117.589	160.091	104.703	149.312	104.378	150.231	109.805	202.411	128.9	164.392	94.756	176.402	122.809	111.774	157.955	152.182	106.126	127.873	134.477	148.336	170.09	148.876	139.177	114.905	110.505	89.93	131.007	82.052	125.523	81.731	138.841	123.701	123.738	100.403	127.541	143.711
k__Bacteria;p__Firmicutes;c__Bacilli;o__Bacillales;f__Staphylococcaceae;g__Staphylococcus;s__Staphylococcus_aureus	7694.42	7885.38	7286.55	9451.49	8187.01	7214.55	7523.8	6561.83	7960.69	7168.78	7378.98	9251.38	9274.43	9393.71	6601.64	8805.68	5850.79	6631.82	7844.28	9731.26	7853.22	9386.29	6218.75	8868.3	8391.65	6969.46	10261.2	8488.17	7006.26	8726.98	6985.2	8993.46	9467.86	7456.98	7871.58	6117.57	6170.67	7095.19	8972.49	5151.35	6541.95	5439.17	8615.24	8006.34	6317.53	6327.89	7680.78	8329.48
k__Bacteria;p__Firmicutes;c__Bacilli;o__Bacillales;f__Staphylococcaceae;g__Staphylococcus;s__Staphylococcus_capitis	6468.43	7466.88	5742.94	6410.1	7058.62	7874.23	10286	4779.49	10462.1	9101.98	7312.91	17852.4	7034.02	7680.11	5061.15	8043.76	5542.76	4061.35	11634.7	5368.94	10455.7	9662.57	4286.96	7306.97	6322.64	4702.34	8148.31	7845.37	13604.1	8376.93	5618.56	12232.6	10562.4	8255.16	4547.68	5775.47	4901.04	6397.22	5538.36	5562.44	4501.46	8727.78	9360.57	6354.05	6615.69	5749.3	7905.06	6142.56
k__Bacteria;p__Firmicutes;c__Bacilli;o__Bacillales;f__Staphylococcaceae;g__Staphylococcus;s__Staphylococcus_chromogenes	224.33	138.199	235.551	303.305	180.747	198.442	196.792	195.189	227.569	195.17	202.893	198.161	218.068	256.376	168.868	254.298	182.621	219.66	218.406	296.482	204.51	200.502	169.498	256.411	245.933	185.948	273.471	188.343	221.155	248.447	205.772	231.426	256.94	189.662	213.305	200.841	185.94	130.74	213.948	145.534	187.756	138.737	219.945	209.042	186.616	177.993	211.619	192.468
k__Bacteria;p__Firmicutes;c__Bacilli;o__Bacillales;f__Staphylococcaceae;g__Staphylococcus;s__Staphylococcus_epidermidis	2	6.061	3	3	1	1	4.897	3	1	1	3	5	4	2	2	0	0	1.232	4	3.472	2.295	5	2	0	4.46	1	0	4.926	5	4.294	3.634	1	0	0	0	3.79	3	3	5	2	2	1	3	2	1	2	0	7
k__Bacteria;p__Firmicutes;c__Bacilli;o__Bacillales;f__Staphylococcaceae;g__Staphylococcus;s__Staphylococcus_haemolyticus	182.094	130.939	129.785	206.294	125.662	165.553	161.838	142.577	167.458	176.487	166.805	188.924	189.139	181.831	124.878	199.797	137.28	157.393	167.815	207.589	164.891	223.163	122.126	182.438	169.899	172.323	168.731	198.742	152.867	184.637	152.898	192.753	222.268	140.388	170.526	122.325	136.886	112.345	199.945	106.793	130.861	104.042	205.774	168.563	127.752	163.792	136.544	202.607
k__Bacteria;p__Firmicutes;c__Bacilli;o__Bacillales;f__Staphylococcaceae;g__Staphylococcus;s__Staphylococcus_hominis	809.797	720.092	886.895	1119.09	1122.84	974.859	874.743	1003	1076.58	875.824	949.854	1098.66	1130.43	1127.08	702.909	1232.68	685.25	803.289	1026.47	1202.66	880.366	1131.97	672.716	1171.71	998.719	890.162	998.677	1098.53	1112.47	1162.01	735.062	1126.12	1246.11	834.437	797.967	940.341	769.044	629.642	995.142	618.578	919.211	555.082	1077.55	1026.49	774.821	901.022	838.046	1188.89
k__Bacteria;p__Firmicutes;c__Bacilli;o__Bacillales;f__Staphylococcaceae;g__Staphylococcus;s__Staphylococcus_pseudintermedius	1125.95	1883.59	1234.09	1725.92	1108.47	1306.83	1279.82	1035.75	1239.85	1155.48	1189.62	1576.21	2009.8	1514.91	965.331	1540.91	924.176	1074.69	1185.36	1264.22	1170.36	1472.28	1074.43	1424.85	1134.39	1083.93	1976.29	1397.03	1231.59	1800.66	963.735	1507.86	1378.66	1091.48	1461.42	925.359	963.334	1600.83	1859.56	620.629	1122.57	786.87	1351.71	1374.43	999.911	1058.58	1509.26	1308.24
k__Bacteria;p__Firmicutes;c__Bacilli;o__Bacillales;f__Staphylococcaceae;g__Staphylococcus;s__Staphylococcus_sciuri	80.16	56.076	66.152	72.022	57.886	36.259	69.863	47.715	67.706	67.158	73.139	61.298	66.286	66.181	50.018	86.859	53.209	57.636	64.414	85.877	77.718	110.1	36.57	89.311	62.54	83.148	71.069	93	58.302	78.132	67.695	85.039	89.036	56.257	62.895	45.111	62.7	51.727	66.094	47.296	48.126	39.314	71.745	58.373	52	54.813	55.94	52.745
k__Bacteria;p__Firmicutes;c__Bacilli;o__Bacillales;f__Staphylococcaceae;g__Staphylococcus;s__Staphylococcus_simulans	1420.92	1271.2	1487.17	1726.67	1560.88	1571.13	1472.44	1356.74	1522.29	1271.07	1491.1	1779.65	1571.27	1842.42	1276	1687.61	1173.54	1271.33	1586.13	1778.42	1376.18	1764.47	1132.12	1742.01	1529.07	1326.59	1537.49	1651.09	1305.3	1733.27	1328.02	1669.27	1785.57	1303.21	1346.37	1153.94	1199.2	1012.6	1539.23	906.089	1210.13	971.083	1615.36	1555.34	1215.32	1226.32	1321.95	1474.47
k__Bacteria;p__Firmicutes;c__Bacilli;o__Bacillales;f__Staphylococcaceae;g__Staphylococcus;s__Staphylococcus_warneri	221.34	175.991	259.013	275.798	262.665	220.935	235.69	200.547	248.054	205.538	216.576	256.073	239.45	275.958	177.337	295.234	203.324	197.37	231.793	305.621	208.658	282.214	180.533	254.033	289.978	222.614	315.062	278.513	239.484	313.251	239.015	273.31	309.9	187.661	176.335	198.551	164.038	147.979	184.297	160.062	184.139	144.78	228.573	258.92	177.905	189.756	223.61	220.032
k__Bacteria;p__Firmicutes;c__Bacilli;o__Bacillales;f__Thermoactinomycetaceae;g__Paludifilum;s__Paludifilum_halophilum	0	0	0	0	2	3	1	0	1	0	0	0	1	0	0	0	1	0	3	4	1	0	0	0	0	0	0	0	0	0	0	0	0	0	1	3	0	1	0	0	0	0	0	0	0	0	0	2
k__Bacteria;p__Firmicutes;c__Bacilli;o__Bacillales;f__unclassified;g__Gemella;s__Gemella_asaccharolytica	0	0	0	0	0	0	0	5	0	0	0	0	0	0	0	0	0	0	0	0	0	0	0	0	0	0	0	0	0	0	0	0	0	0	0	0	0	0	0	0	0	0	1	0	1	0	463.623	1
k__Bacteria;p__Firmicutes;c__Bacilli;o__Lactobacillales;f__Aerococcaceae;g__Aerococcus;s__Aerococcus_christensenii	1	36	0	0	0	0	0	2	0	1	0	1	858.566	39	0	0	0	1	0	73.699	23.932	0	4	128	1	0	41	2	415	8	36.553	0	2	39.968	85	0	19	120	164	0	201	21	419.463	1	0	0	127	196.107
k__Bacteria;p__Firmicutes;c__Bacilli;o__Lactobacillales;f__Aerococcaceae;g__Aerococcus;s__Aerococcus_sanguinicola	0	0	0	0	0	8	0	0	0	0	0	0	0	0	0	0	0	0	0	0	0	0	0	0	0	0	0	0	0	0	0	0	0	0	0	0	0	0	0	0	0	0	0	0	0	0	0	0
k__Bacteria;p__Firmicutes;c__Bacilli;o__Lactobacillales;f__Aerococcaceae;g__Aerococcus;s__Aerococcus_sp._HMSC23C02	94.557	96.737	108.348	124.396	112.302	125.071	120.186	117.617	124.299	100.227	107.128	106.533	93.755	124.521	75.794	120.253	101.837	130.452	110.252	135.636	106.79	133.788	94.095	139.719	109.034	109.527	140.803	115.928	100.959	127.025	94.066	116.484	113.865	94.184	111.561	98.493	73.677	75.46	106.317	81.225	96.977	84.643	126.239	118.654	101.463	109.345	115.911	89.454
k__Bacteria;p__Firmicutes;c__Bacilli;o__Lactobacillales;f__Carnobacteriaceae;g__Atopobacter;s__Atopobacter_sp._AH10	1	0	0	0	0	0	28	2	0	0	0	0	559.946	28	0	2	0	1	0	233	1	4.058	144	0	0	0	65.037	11	286.609	7	38	0	0	1	498.083	0	120.108	0	0	0	0	0	0	0	0	0	360.528	6.19
k__Bacteria;p__Firmicutes;c__Bacilli;o__Lactobacillales;f__Carnobacteriaceae;g__Carnobacterium;s__Carnobacterium_divergens	0	0	0	0	0	0	4	0	0	0	0	0	0	0	0	0	0	0	0	79	0	0	0	0	0	0	0	0	0	0	0	0	0	0	0	0	55.896	0	0	0	0	0	0	0	0	0	0	0
k__Bacteria;p__Firmicutes;c__Bacilli;o__Lactobacillales;f__Carnobacteriaceae;g__Carnobacterium;s__Carnobacterium_sp._17-4	0	0	0	0	0	0	0	0	0	3	1	2	0	2	2	0	4	0	0	0	0	0	0	0	1	0	1	0	0	0	0	0	0	0	0	0	0	0	0	0	0	0	0	0	0	0	0	0
k__Bacteria;p__Firmicutes;c__Bacilli;o__Lactobacillales;f__Carnobacteriaceae;g__Dolosigranulum;s__Dolosigranulum_pigrum	0	0	0	0	0	0	0	0	0	0	0	0	0	0	0	0	0	0	0	0	0	0	0	0	0	0	0	0	0	0	0	0	0	0	79.032	0	0	0	0	0	0	0	0	0	0	0	0	0
k__Bacteria;p__Firmicutes;c__Bacilli;o__Lactobacillales;f__Carnobacteriaceae;g__Granulicatella;s__Granulicatella_sp._HMSC31F03	0	0	0	0	0	6	0	0	0	0	0	0	0	0	0	0	0	0	0	0	0	0	0	0	0	0	0	0	0	0	0	0	0	0	0	0	0	0	0	0	0	0	0	0	0	0	0	0
k__Bacteria;p__Firmicutes;c__Bacilli;o__Lactobacillales;f__Enterococcaceae;g__Enterococcus;s__Enterococcus_casseliflavus	129.515	114.063	160.843	140.441	120.057	159	147.526	117.999	140.766	122.296	126.728	133.054	138.982	166.485	112.98	122.663	126.401	127.973	118	158.068	121.998	141.515	102.938	131.652	153.082	156.125	142.56	108.162	109.45	182.716	113.224	151.387	172.25	97.271	102.864	81.786	73.024	71.002	121.626	72.474	86	94.234	170.131	132.883	109.434	102.12	120.256	140.619
k__Bacteria;p__Firmicutes;c__Bacilli;o__Lactobacillales;f__Enterococcaceae;g__Enterococcus;s__Enterococcus_cecorum	12	1502.87	23	1	0	3	6	11	31	3	12	59	940	36	0	1	0	31	25	62	24	22	207.123	62	446	57.961	1288.83	42	502	8	142	44.048	17	116	747	3	19	1319	920.997	38	222	47	471.992	3	2	35	566.551	150
k__Bacteria;p__Firmicutes;c__Bacilli;o__Lactobacillales;f__Enterococcaceae;g__Enterococcus;s__Enterococcus_faecalis	15499.1	11967.4	15840.2	19321.5	17116.8	15757.1	16193	14267.4	17900.2	16125.1	16010.9	19291.6	17511.3	19389.7	13809	19396.7	12896.5	14080.9	17783.3	21301.8	16190.5	19715.7	12851	19342.8	17867.5	15374.4	18263.9	18449	16177.3	20679.9	14295.4	19676.3	20496.2	14636.5	14768.3	13698.8	12770.6	11598.4	16860.3	10754	14067	11198.3	17961	17037.7	13752.1	14332.2	14579.9	17318.3
k__Bacteria;p__Firmicutes;c__Bacilli;o__Lactobacillales;f__Enterococcaceae;g__Enterococcus;s__Enterococcus_faecium	802.109	765.246	891.72	854.669	763.216	807.051	802.875	624.918	804.084	719.956	779.944	843.767	924.164	899.099	619.191	885.636	768.001	789.335	829.699	929.604	705.842	876.539	680.213	1327.47	902.772	711.236	1014.05	864.534	766.244	947.18	882.713	900.17	926.259	691.181	1665.53	636.5	561.783	9306.86	946.689	501.866	568.522	516.271	846.193	734.241	630.529	711.186	694.128	740.653
k__Bacteria;p__Firmicutes;c__Bacilli;o__Lactobacillales;f__Enterococcaceae;g__Enterococcus;s__Enterococcus_hirae	607.208	413.093	691.415	669.086	488.835	624.209	644.921	481.45	583.111	718.978	603.876	951.243	731.37	664.41	421.362	650.545	344.699	511.877	577.86	618.242	525.159	790.956	427.625	594.837	521.077	490.575	467.313	616.984	643.548	765.319	424.117	825.937	720.431	371.108	455.499	353.149	468.923	363.567	533.443	264.688	473.159	398.229	507.761	844.851	433.373	343.159	632.144	626.518
k__Bacteria;p__Firmicutes;c__Bacilli;o__Lactobacillales;f__Enterococcaceae;g__Enterococcus;s__Enterococcus_sp.	18	3160.95	0	0	2	8	17.289	7	51.706	13	0	2	1838.75	66.796	4	0	1	0	0	152.048	29.907	1	372.657	0	31.043	8	2301.62	97.61	1	21.713	103.132	0	71.696	211.399	1501.26	2	83.376	2687.43	1874.26	0	496.838	56.353	0	3	0	0	1196.77	292.338
k__Bacteria;p__Firmicutes;c__Bacilli;o__Lactobacillales;f__Lactobacillaceae;g__Lactiplantibacillus;s__Lactiplantibacillus_plantarum	8	342	3	5	6	9	9	2	9	3	9	10	204	20	1	3	1	1	2	20	11	20	25	3	7	8	235	18	105	7	68.257	5	14	25	149	3	11	255	202.991	5	35	10	82	7	6	1	123	35
k__Bacteria;p__Firmicutes;c__Bacilli;o__Lactobacillales;f__Lactobacillaceae;g__Lactobacillus;s__Lactobacillus_acetotolerans	0	0	0	0	0	0	0	3	0	0	0	0	0	0	0	0	0	0	0	0	0	0	0	0	0	0	0	0	0	0	0	0	0	0	0	0	0	0	0	0	0	0	0	0	0	0	0	0
k__Bacteria;p__Firmicutes;c__Bacilli;o__Lactobacillales;f__Lactobacillaceae;g__Lactobacillus;s__Lactobacillus_acidophilus	1	1	846.078	0	0	2	0	382.495	0	48.046	183.808	4	0	413.682	3	5	2.935	1358.1	1364.56	5	1	15	0	0	10	3198.02	1270.81	3	2	20	3647.4	2103.83	0	49	0	16	0	2	3	1818.63	1	0	2	1	2	1390.15	697.242	1
k__Bacteria;p__Firmicutes;c__Bacilli;o__Lactobacillales;f__Lactobacillaceae;g__Lactobacillus;s__Lactobacillus_amylolyticus	0	0	2.345	0	0	0	0	4	0	0	2	0	0	2	0	0	0	7	6	0	0	0	0	0	0	13	6.318	0	0	0	13.908	7	0	0	0	0	0	0	0	7.782	0	0	0	0	0	7.697	0	0
k__Bacteria;p__Firmicutes;c__Bacilli;o__Lactobacillales;f__Lactobacillaceae;g__Lactobacillus;s__Lactobacillus_amylovorus	3	733.489	225.118	0	0	0	0	185.686	12	27.466	105.935	1	437	261.206	1	2	0	425.569	309.534	34	9	1	84	2	2	2298.92	923.896	3	1	8	1079.76	795.494	13	34	358.398	5.515	21	599	393	734.583	114	16	0	1	0	374.785	235	66
k__Bacteria;p__Firmicutes;c__Bacilli;o__Lactobacillales;f__Lactobacillaceae;g__Lactobacillus;s__Lactobacillus_animalis	0	0	3	0	0	0	0	0	0	0	0	0	0	0	1	0	1	0	2	1	0	1	0	0	1	2	0	0	0	6	1	0	0	0	0	0	0	0	0	0	0	1	0	0	1	1	0	0
k__Bacteria;p__Firmicutes;c__Bacilli;o__Lactobacillales;f__Lactobacillaceae;g__Lactobacillus;s__Lactobacillus_antri	0	0	0	0	0	0	0	0	0	0	0	0	3	0	0	0	0	0	0	0	0	0	0	0	0	0	0	0	0	0	0	0	0	0	0	0	0	0	0	0	0	0	0	0	0	0	0	0
k__Bacteria;p__Firmicutes;c__Bacilli;o__Lactobacillales;f__Lactobacillaceae;g__Lactobacillus;s__Lactobacillus_bombicola	0	0	0	0	0	0	0	0	0	0	0	0	0	0	0	0	0	0	0	0	0	0	0	0	0	0	0	0	0	0	0	0	0	0	0	0	0	0	0	27	0	0	0	0	0	0	0	0
k__Bacteria;p__Firmicutes;c__Bacilli;o__Lactobacillales;f__Lactobacillaceae;g__Lactobacillus;s__Lactobacillus_brevis	0	49	6	0	0	0	0	1	2	0	0	12	56	4	0	0	0	2	3	4	0	0	12	0	17	15	61	3	19	0	20	5	1	4	32	0	2	53	28	6	8	1	17	0	1	5	25	13
k__Bacteria;p__Firmicutes;c__Bacilli;o__Lactobacillales;f__Lactobacillaceae;g__Lactobacillus;s__Lactobacillus_coleohominis	0	0	0	0	0	0	0	0	0	0	0	0	41	0	0	0	0	3	0	0	0	0	0	0	0	0	0	0	0	0	2	0	0	0	0	0	0	0	0	0	0	0	0	0	0	0	3	0
k__Bacteria;p__Firmicutes;c__Bacilli;o__Lactobacillales;f__Lactobacillaceae;g__Lactobacillus;s__Lactobacillus_crispatus	13346.9	13684.4	45850.4	18602.9	18228.5	16993.8	17317.3	31382.6	20011.4	17345.8	26082.6	22477.6	19251.9	38944.2	12910.3	20494.8	11639	68237	68884.9	19548	18205.3	24135.1	11645.8	20849.8	21738.8	146732	72787.1	19374.9	15928.6	23457.1	137657	111398	23866.6	19692.8	17585.5	15960.6	13181.1	15268.9	17666.2	81886.1	12962.9	11622.9	21822	18899.7	18377.9	73451.8	14899.4	18193.9
k__Bacteria;p__Firmicutes;c__Bacilli;o__Lactobacillales;f__Lactobacillaceae;g__Lactobacillus;s__Lactobacillus_delbrueckii	0	0	7	0	0	0	0	4	0	1	7	0	0	6	0	0	0	15	8	0	1	0	0	0	20	32	27	0	0	0	47	15	0	0	0	0	0	0	0	30	0	0	1	0	1	10	0	0
k__Bacteria;p__Firmicutes;c__Bacilli;o__Lactobacillales;f__Lactobacillaceae;g__Lactobacillus;s__Lactobacillus_equicursoris	0	0	3	0	0	0	0	0	0	0	0	0	0	0	0	0	0	9	5	0	0	0	0	0	0	4	0	0	0	0	0	6	0	0	0	3	0	0	0	4	0	0	0	0	0	3	0	0
k__Bacteria;p__Firmicutes;c__Bacilli;o__Lactobacillales;f__Lactobacillaceae;g__Lactobacillus;s__Lactobacillus_equigenerosi	0	0	0	0	0	0	0	0	0	1	0	0	0	0	0	0	0	0	0	0	8	0	0	443	0	0	0	0	0	0	0	0	0	0	499.513	0	0	848.068	0	1	0	1	0	0	0	0	0	0
k__Bacteria;p__Firmicutes;c__Bacilli;o__Lactobacillales;f__Lactobacillaceae;g__Lactobacillus;s__Lactobacillus_farciminis	0	0	0	0	0	0	0	0	0	0	0	0	0	0	0	0	0	0	0	0	0	0	0	0	0	0	178.12	0	0	0	0	0	0	0	0	0	0	0	0	0	0	0	0	0	0	0	0	0
k__Bacteria;p__Firmicutes;c__Bacilli;o__Lactobacillales;f__Lactobacillaceae;g__Lactobacillus;s__Lactobacillus_frumenti	0	0	0	0	0	0	0	0	0	0	0	0	14	0	0	0	0	0	0	0	0	0	0	0	0	0	0	0	0	0	0	0	0	0	0	0	0	0	0	0	0	0	306	0	0	0	3	0
k__Bacteria;p__Firmicutes;c__Bacilli;o__Lactobacillales;f__Lactobacillaceae;g__Lactobacillus;s__Lactobacillus_gallinarum	0	0	2.838	0	0	0	0	7.506	0	0	1.867	0	0	2	0	0	0	1	2.811	0	0	0	0	0	0	4.494	0	0	0	0	1.343	85.995	0	0	0	0	0	0	0	32	0	0	0	0	0	1.897	0	0
k__Bacteria;p__Firmicutes;c__Bacilli;o__Lactobacillales;f__Lactobacillaceae;g__Lactobacillus;s__Lactobacillus_gasseri	25	8671.45	11	6	0	8	4	22	22	21	7	4065.06	4462.18	167	14	6	0	15.917	3.875	471.472	3	166	804	5	37845.2	7.947	9019.23	218.657	490.634	80.694	288	9.217	42	975.502	589.747	8	34	1211	3743.22	0	211	25	4031.99	14	2046.12	23.448	2576.88	1582.77
k__Bacteria;p__Firmicutes;c__Bacilli;o__Lactobacillales;f__Lactobacillaceae;g__Lactobacillus;s__Lactobacillus_helveticus	0	59	91.845	0	0	0	8	117.053	9	4	21.914	0	0	40.105	0	0	0	222.305	76.458	3.52	0	0	14	0	1	452.911	366.198	2	18	0	250.374	222.912	0	9.685	35	1	0	45	38	438.437	18	1	14	0	0	145.144	1	138.73
k__Bacteria;p__Firmicutes;c__Bacilli;o__Lactobacillales;f__Lactobacillaceae;g__Lactobacillus;s__Lactobacillus_hokkaidonensis	0	0	0	0	0	0	0	0	0	0	0	0	3	0	0	0	0	1	0	0	0	0	0	0	0	0	0	0	0	0	0	0	0	0	0	0	0	0	0	0	0	0	0	0	0	0	0	0
k__Bacteria;p__Firmicutes;c__Bacilli;o__Lactobacillales;f__Lactobacillaceae;g__Lactobacillus;s__Lactobacillus_hominis	0	0	0	0	0	0	0	0	0	0	0	0	0	0	0	0	0	0	0	0	0	0	0	0	0	0	0	0	0	5	0	0	0	0	0	0	0	0	0	0	0	0	0	0	7	0	0	0
k__Bacteria;p__Firmicutes;c__Bacilli;o__Lactobacillales;f__Lactobacillaceae;g__Lactobacillus;s__Lactobacillus_iners	7090.9	1.45319e+06	40.867	44	192.5	482.001	4300.2	4933.57	24242.4	3623.36	665.984	909.445	788307	28557.5	207	612.999	117	482.009	75.984	67528.3	653.389	15217	153039	1931.73	1920.74	1165.74	1.04084e+06	46971.4	427912	8220.16	50601.6	34.161	25926.8	94328.6	666504	554.942	28869.1	1.18487e+06	770381	1316.69	219396	25105.8	320993	2677.87	293.137	409.001	498447	129055
k__Bacteria;p__Firmicutes;c__Bacilli;o__Lactobacillales;f__Lactobacillaceae;g__Lactobacillus;s__Lactobacillus_intestinalis	48	0	0	0	0	0	0	0	0	0	0	0	0	0	0	0	0	0	0	0	0	0	0	0	0	0	0	0	0	0	0	0	0	0	0	0	0	0	0	31.544	0	0	0	0	0	0	0	0
k__Bacteria;p__Firmicutes;c__Bacilli;o__Lactobacillales;f__Lactobacillaceae;g__Lactobacillus;s__Lactobacillus_jensenii	65.008	3189	353.927	146	26	3.002	34.964	212.951	122	242.221	200.726	117910	2290.11	335.208	302	78	3	559.989	523.279	266.97	4	86.674	484	23	701256	1608.29	174344	696.076	1654.02	4885.62	2394.71	1004.27	160.38	16660.7	5471.2	40.863	61	2834.74	1807	929.743	531	57	187180	51	95	1085.16	1762.94	19625.3
k__Bacteria;p__Firmicutes;c__Bacilli;o__Lactobacillales;f__Lactobacillaceae;g__Lactobacillus;s__Lactobacillus_johnsonii	0	0	17.164	0	0	0	4	4	2	0	3	89.751	1192.4	6	0	0	0	12.433	14.059	0	0	11	227	0	0	27.605	78.757	1.343	1	0	95.649	10.573	0	0	3.663	0	0	0	0	28.174	0	0	385.609	0	85.252	16	174.158	3.063
k__Bacteria;p__Firmicutes;c__Bacilli;o__Lactobacillales;f__Lactobacillaceae;g__Lactobacillus;s__Lactobacillus_kalixensis	0	0	0	0	0	0	0	1.085	0	0	0	0	0	0	0	0	0	0	0	0	0	0	0	0	0	0	0	0	0	0	0	0	0	0	0	0	0	0	0	12	0	0	0	0	0	0	0	0
k__Bacteria;p__Firmicutes;c__Bacilli;o__Lactobacillales;f__Lactobacillaceae;g__Lactobacillus;s__Lactobacillus_kefiranofaciens	0	0	44.081	0	0	0	0	8.488	0	3	10.197	0	1	12.1	0	0	0	39.366	48.613	0	0	0	0	0	0	80.655	38.124	0	0	0	182.548	70.215	0	0	0	0	0	0	0	66.31	0	0	0	0	0	59	0	0
k__Bacteria;p__Firmicutes;c__Bacilli;o__Lactobacillales;f__Lactobacillaceae;g__Lactobacillus;s__Lactobacillus_kitasatonis	0	1	3	0	0	0	0	2.956	0	11	39	0	0	158	0	0	0	0	0	0	0	0	0	0	0	1683.99	0	0	0	0	11.265	228	0	0	0	0	0	0	1	27.553	0	0	0	0	0	0	1	0
k__Bacteria;p__Firmicutes;c__Bacilli;o__Lactobacillales;f__Lactobacillaceae;g__Lactobacillus;s__Lactobacillus_kullabergensis	0	0	0	0	0	0	0	0	0	0	0	0	0	0	0	0	0	0	0	0	0	0	0	0	0	0	0	0	0	0	0	0	0	0	0	0	0	0	0	0	0	0	0	0	14	0	0	0
k__Bacteria;p__Firmicutes;c__Bacilli;o__Lactobacillales;f__Lactobacillaceae;g__Lactobacillus;s__Lactobacillus_mudanjiangensis	218.365	159.999	194.299	242.381	226.986	211.601	200.859	173.847	243.436	204.471	205.386	257.764	220.97	260.673	219.208	262.509	180.124	199.234	253.921	287.05	224.582	263.957	171.876	227.76	249.897	169.53	242.94	237.812	177.547	249.806	212.755	239.103	291.7	186.3	152.737	207.754	153.198	128.551	202.195	108.704	165.391	135.646	250.347	225.257	192.469	149.006	200.519	206.592
k__Bacteria;p__Firmicutes;c__Bacilli;o__Lactobacillales;f__Lactobacillaceae;g__Lactobacillus;s__Lactobacillus_mulieris	0	0	0	0	5	0	0	0	2	0	2.274	673.422	2	0	0	12	0	0	0	0	0	2	0	5	146.312	0	23938.1	19	16	732.17	11	0	0	8.858	615.397	0	0	0	0	0	0	0	49	0	1	0	0	11.388
k__Bacteria;p__Firmicutes;c__Bacilli;o__Lactobacillales;f__Lactobacillaceae;g__Lactobacillus;s__Lactobacillus_nodensis	0	0	0	0	0	0	0	0	0	0	0	0	5	0	0	0	0	0	0	0	0	0	0	0	0	0	0	0	0	0	0	0	0	0	0	0	0	0	0	0	0	0	0	0	0	0	0	0
k__Bacteria;p__Firmicutes;c__Bacilli;o__Lactobacillales;f__Lactobacillaceae;g__Lactobacillus;s__Lactobacillus_oris	0	0	0	0	0	0	0	0	0	0	0	0	21	0	0	0	0	0	0	0	0	0	0	0	0	0	0	0	0	0	6	0	0	0	0	0	0	0	0	0	0	0	0	0	0	0	0	0
k__Bacteria;p__Firmicutes;c__Bacilli;o__Lactobacillales;f__Lactobacillaceae;g__Lactobacillus;s__Lactobacillus_panis	0	0	0	0	0	0	0	0	0	0	0	0	3	0	0	0	0	0	0	0	0	0	0	0	0	0	0	0	0	0	0	0	0	0	0	0	0	0	0	0	0	0	0	0	1	0	0	0
k__Bacteria;p__Firmicutes;c__Bacilli;o__Lactobacillales;f__Lactobacillaceae;g__Lactobacillus;s__Lactobacillus_parabuchneri	0	0	2	0	0	0	0	1	0	0	0	0	67	0	0	0	0	0	0	0	0	0	0	0	0	0	0	0	0	0	2	0	0	0	0	0	0	0	0	0	0	1	0	0	0	0	19	0
k__Bacteria;p__Firmicutes;c__Bacilli;o__Lactobacillales;f__Lactobacillaceae;g__Lactobacillus;s__Lactobacillus_paragasseri	1	480	2	0	0	0	2	7	8	3	0	160	359	12	0	1	0	6	0	32	0	57.39	74	0	261	5.739	469	20	173	6	29	0	9	29	252	0	10	464.428	274	2	85	13	753.8	1	1390.61	3	188	52
k__Bacteria;p__Firmicutes;c__Bacilli;o__Lactobacillales;f__Lactobacillaceae;g__Lactobacillus;s__Lactobacillus_psittaci	0	0	0	0	0	0	0	0	0	0	0	140.815	0	0	0	0	0	2	0	0	0	0	0	0	809.797	0	1	0	0	1	0	0	0	18	0	0	0	0	0	0	0	0	243.217	0	0	0	1	24.4
k__Bacteria;p__Firmicutes;c__Bacilli;o__Lactobacillales;f__Lactobacillaceae;g__Lactobacillus;s__Lactobacillus_reuteri	0	1	8	2	2	4	0	2	1	0	2	7	155.049	1	0	7	4	4	3	2	0	0	1	14	0	1	101.644	1	0	3	92	0	2	1	1	2	0	1	3	3	3	1	1421.81	1	11.555	1	195	4
k__Bacteria;p__Firmicutes;c__Bacilli;o__Lactobacillales;f__Lactobacillaceae;g__Lactobacillus;s__Lactobacillus_rhamnosus	15.248	13.977	16.346	25.924	17.047	18.201	16.193	9.408	14.571	12.531	20.242	20.662	15.225	21.95	8	32.171	16.917	13	15	24.38	31.163	30.329	8.543	32.715	12.836	13	26.363	21.729	28.702	28.139	20.082	25.155	17.884	19.813	7	11.242	24.274	14	11.958	15.512	25.991	12.531	12.241	19.418	13.944	11	19.14	8.734
k__Bacteria;p__Firmicutes;c__Bacilli;o__Lactobacillales;f__Lactobacillaceae;g__Lactobacillus;s__Lactobacillus_ruminis	2	302	0	0	0	0	2	0	7	0	0	0	176	10	0	0	0	0	0	27	0	4	31	0	1	2	231.102	10	92	3	13	1	9	8	120	0	5	252	150	0	44	10	52	0	1	0	105	33
k__Bacteria;p__Firmicutes;c__Bacilli;o__Lactobacillales;f__Lactobacillaceae;g__Lactobacillus;s__Lactobacillus_salivarius	0	0	0	0	0	0	0	0	0	0	0	0	7	0	0	0	0	0	0	0	0	0	0	0	0	0	0	0	0	0	0	0	0	0	0	0	0	0	0	0	0	0	0	0	0	0	0	0
k__Bacteria;p__Firmicutes;c__Bacilli;o__Lactobacillales;f__Lactobacillaceae;g__Lactobacillus;s__Lactobacillus_sanfranciscensis	0	0	0	0	0	0	0	0	0	0	0	0	0	0	0	0	0	0	0	0	4	0	0	0	0	0	0	0	0	0	0	0	0	0	0	0	0	0	0	0	0	0	0	0	0	0	0	0
k__Bacteria;p__Firmicutes;c__Bacilli;o__Lactobacillales;f__Lactobacillaceae;g__Lactobacillus;s__Lactobacillus_silagei	0	0	2	0	0	0	0	0	0	0	0	8	0	0	0	0	0	2	1	0	0	0	0	0	47	7	21	0	0	0	6	3	0	1	0	0	0	0	0	1	0	0	19	0	0	1	0	0
k__Bacteria;p__Firmicutes;c__Bacilli;o__Lactobacillales;f__Lactobacillaceae;g__Lactobacillus;s__Lactobacillus_sp._ESL0225	0	0	0	0	0	0	0	0	0	0	0	0	0	0	0	0	0	0	0	0	0	0	0	0	0	0	0	0	0	0	0	0	0	0	0	0	0	259	0	1	0	0	0	0	0	0	0	0
k__Bacteria;p__Firmicutes;c__Bacilli;o__Lactobacillales;f__Lactobacillaceae;g__Lactobacillus;s__Lactobacillus_sp._HT06-2	0	0	0	0	0	0	0	0	0	0	1	0	0	0	0	0	0	4	0	0	0	0	0	0	0	0	0	0	0	0	0	0	0	0	0	0	0	0	0	0	0	0	0	0	0	0	0	0
k__Bacteria;p__Firmicutes;c__Bacilli;o__Lactobacillales;f__Lactobacillaceae;g__Lactobacillus;s__Lactobacillus_sp._HT170-2	0	0	0	0	0	0	0	0	0	0	0	0	0	0	0	0	0	0	0	0	0	0	0	0	0	0	0	0	0	0	0	0	0	0	0	0	0	0	0	4.201	0	0	0	0	0	0	0	0
k__Bacteria;p__Firmicutes;c__Bacilli;o__Lactobacillales;f__Lactobacillaceae;g__Lactobacillus;s__Lactobacillus_sp._JM1	0	0	0	0	0	0	0	0	0	0	0	0	0	0	0	0	0	0	0	0	0	2	0	0	0	0	0	0	0	0	0	0	0	0	0	0	0	0	0	0	0	0	0	0	32.552	0	0	0
k__Bacteria;p__Firmicutes;c__Bacilli;o__Lactobacillales;f__Lactobacillaceae;g__Lactobacillus;s__Lactobacillus_sp._UMNPBX1	0	0	6	0	0	0	0	0	0	1	5	0	0	2.833	0	0	0	42.146	6	0	0	0	0	0	0	51.396	15	0	1	0	56.275	0	0	0	0	0	0	0	0	0	0	0	0	0	0	0.941	0	0
k__Bacteria;p__Firmicutes;c__Bacilli;o__Lactobacillales;f__Lactobacillaceae;g__Lactobacillus;s__Lactobacillus_sp._UMNPBX11	0	0	48.148	0	0	0	0	29.174	0	0	6.784	0	0	4	0	0	0	48.674	22.41	0	0	0	0	0	1	48	30.856	0	1	2	126.543	51.458	0	0	0	0	0	0	0	88.404	0	0	0	0	0	33.235	0	0
k__Bacteria;p__Firmicutes;c__Bacilli;o__Lactobacillales;f__Lactobacillaceae;g__Lactobacillus;s__Lactobacillus_sp._UMNPBX12	2	0	21.472	0	0	0	0	3.413	0	2	3	0	0	9	0	0	0	33.614	28.187	0	0	1	0	0	0	81.56	44	0	0	0	88.124	76.761	0	0	0	0	0	0	0	41.312	0	0	0	0	0	29	0	0
k__Bacteria;p__Firmicutes;c__Bacilli;o__Lactobacillales;f__Lactobacillaceae;g__Lactobacillus;s__Lactobacillus_sp._UMNPBX17	1	1	1	0	1	3	1	0	0	1	0	1	0	2	2	0	1	0	0	0	1	0	541.673	3	0.37	0	0	16.06	2	0	0	0	0	460.456	4.265	1	1	0	0	0	0	1	2	0	0	0	0	0
k__Bacteria;p__Firmicutes;c__Bacilli;o__Lactobacillales;f__Lactobacillaceae;g__Lactobacillus;s__Lactobacillus_sp._UMNPBX19	0	0	0	0	0	0	0	0	0	0	0	0	0	0	0	0	0	0	0	0	0	0	0	0	0	0	0	0	0	0	0	0	0	0	0	0	0	0	0	0	0	0	0	0	4	0	0	0
k__Bacteria;p__Firmicutes;c__Bacilli;o__Lactobacillales;f__Lactobacillaceae;g__Lactobacillus;s__Lactobacillus_sp._UMNPBX5	0	0	0	0	0	0	0	0	0	0	0	0	115.477	0	0	0	0	2	0	0	1	4	0	0	0	0	0	0	0	0	12	0	0	0	0	0	0	0	0	0	0	0	0	0	0	0	5	0
k__Bacteria;p__Firmicutes;c__Bacilli;o__Lactobacillales;f__Lactobacillaceae;g__Lactobacillus;s__Lactobacillus_sp._UMNPBX6	0	0	0	0	0	0	0	18	0	0	0	0	0	0	0	0	0	0	0	0	0	0	0	0	0	0	0	0	0	0	0	0	0	0	0	0	0	0	0	33.806	0	0	0	0	0	0	0	0
k__Bacteria;p__Firmicutes;c__Bacilli;o__Lactobacillales;f__Lactobacillaceae;g__Lactobacillus;s__Lactobacillus_sp._UMNPBX7	0	0	0	0	0	0	0	0	0	0	0	0	44.951	0	0	0	0	0	0	0	0	0	0	0	0	0	0	0	0	0	2	0	0	0	0	0	0	0	0	0	0	0	0	0	0	0	11	0
k__Bacteria;p__Firmicutes;c__Bacilli;o__Lactobacillales;f__Lactobacillaceae;g__Lactobacillus;s__Lactobacillus_sp._UMNPBX8	0	0	4.864	0	0	0	0	13.696	0	0	0	0	0	0	0	0	0	0	0	0	0	0	0	0	0	0	0	0	0	0	0	0	0	0	0	0	0	0	0	8.101	0	0	0	0	0	0	0	0
k__Bacteria;p__Firmicutes;c__Bacilli;o__Lactobacillales;f__Lactobacillaceae;g__Lactobacillus;s__Lactobacillus_sp._c10Ua232AE	0	0	0	0	0	0	0	0	0	0	0	0	0	0	0	0	0	0	0	0	0	0	0	0	0	0	238.112	0	0	16	0	0	0	0	7	0	0	0	0	0	0	0	0	0	0	0	0	0
k__Bacteria;p__Firmicutes;c__Bacilli;o__Lactobacillales;f__Lactobacillaceae;g__Lactobacillus;s__Lactobacillus_taiwanensis	0	0	0	0	0	0	0	1	0	0	0	0	0	0	0	0	0	0	0	0	0	0	0	0	0	0	0	0	0	0	0	0	0	0	0	0	0	0	0	8.401	0	0	0	0	43	0	0	0
k__Bacteria;p__Firmicutes;c__Bacilli;o__Lactobacillales;f__Lactobacillaceae;g__Lactobacillus;s__Lactobacillus_ultunensis	0	0	0	0	0	0	0	0	0	0	0.373	0	0	0	0	0	0	1.486	2.818	0	0	0	0	0	0	0	0	0	0	0	0	8.094	0	0	0	0	0	0	0	0.02	0	0	0	0	0	2.412	0	0
k__Bacteria;p__Firmicutes;c__Bacilli;o__Lactobacillales;f__Lactobacillaceae;g__Lactobacillus;s__Lactobacillus_vaginalis	0	0	0	0	0	0	0	0	0	0	0	0	256.795	0	0	0	0	3	0	0	0	1	0	0	0	0	0	0	0	0	88	0	0	0	0	0	0	0	0	0	0	0	0	0	3	0	35	0
k__Bacteria;p__Firmicutes;c__Bacilli;o__Lactobacillales;f__Lactobacillaceae;g__Limosilactobacillus;s__Limosilactobacillus_fermentum	0	0	15	0	0	0	0	0	0	0	0	0	12	0	0	0	0	0	0	0	0	0	0	0	0	0	0	0	0	0	6	0	0	0	0	0	0	0	0	17.025	0	0	392.332	0	0	0	0	1
k__Bacteria;p__Firmicutes;c__Bacilli;o__Lactobacillales;f__Lactobacillaceae;g__Limosilactobacillus;s__Limosilactobacillus_sp._BG-AF3-A	0	0	0	0	0	0	0	0	0	0	0	0	3	0	0	0	0	0	0	0	0	0	0	0	0	0	0	0	0	0	0	0	0	0	0	0	0	0	0	0	0	0	0	0	0	0	0	0
k__Bacteria;p__Firmicutes;c__Bacilli;o__Lactobacillales;f__Lactobacillaceae;g__Limosilactobacillus;s__Limosilactobacillus_sp._RRLNB_1_1	0	0	0	0	0	0	0	1	0	0	0	0	86	0	0	0	0	0	0	0	0	0	0	0	0	0	0	0	0	0	1	0	0	0	0	0	0	0	0	0	0	0	0	0	0	0	28	0
k__Bacteria;p__Firmicutes;c__Bacilli;o__Lactobacillales;f__Lactobacillaceae;g__Limosilactobacillus;s__Limosilactobacillus_sp._WF-MA3-C	0	0	0	0	0	0	0	0	0	0	0	0	19	0	0	0	0	0	0	0	0	0	0	0	0	0	0	0	0	0	14	0	0	0	0	0	0	0	0	0	0	0	0	0	0	0	0	0
k__Bacteria;p__Firmicutes;c__Bacilli;o__Lactobacillales;f__Lactobacillaceae;g__Limosilactobacillus;s__Limosilactobacillus_sp._WF-MO7-1	0	0	0	0	0	0	0	0	0	0	0	0	87	0	0	0	0	1	0	0	0	0	0	0	0	0	0	0	0	0	11	0	0	0	0	0	0	0	0	0	0	0	0	0	0	0	5.179	0
k__Bacteria;p__Firmicutes;c__Bacilli;o__Lactobacillales;f__Lactobacillaceae;g__Limosilactobacillus;s__Limosilactobacillus_sp._pH52_RY	0	0	0	0	0	0	0	0	0	0	0	0	12	0	0	0	0	0	0	0	0	0	0	0	0	0	0	0	0	0	0	0	0	0	0	0	0	0	0	0	0	0	0	0	0	0	0	0
k__Bacteria;p__Firmicutes;c__Bacilli;o__Lactobacillales;f__Lactobacillaceae;g__Pediococcus;s__Pediococcus_acidilactici	0	0	0	0	0	0	0	0	0	0	0	0	14	0	0	0	0	0	0	0	0	0	0	0	0	0	0	0	0	0	0	0	0	0	0	0	0	0	0	0	0	0	387.37	0	0	0	1	0
k__Bacteria;p__Firmicutes;c__Bacilli;o__Lactobacillales;f__Lactobacillaceae;g__Pediococcus;s__Pediococcus_pentosaceus	0	0	8	0	0	0	0	0	0	0	0	0	0	0	0	0	0	0	0	0	0	0	0	0	0	0	0	0	0	0	0	0	0	0	0	0	0	0	0	0	0	0	0	0	0	0	0	0
k__Bacteria;p__Firmicutes;c__Bacilli;o__Lactobacillales;f__Leuconostocaceae;g__Leuconostoc;s__Leuconostoc_citreum	0	0	0	0	0	3	0	0	0	0	0	0	0	0	0	0	0	0	0	0	0	0	0	0	0	0	0	0	0	0	0	0	0	0	0	0	0	0	0	0	0	0	0	0	0	0	0	0
k__Bacteria;p__Firmicutes;c__Bacilli;o__Lactobacillales;f__Leuconostocaceae;g__Leuconostoc;s__Leuconostoc_mesenteroides	446.986	292.355	465.498	504.784	402.479	410.888	410.495	351.51	448.411	376.747	393.988	560.831	464.823	497.019	397.417	553.148	359.741	401.828	403.594	511.603	385.475	443.304	331.163	502.967	470.056	359.959	455.684	486.712	406.34	525.183	355.316	511.19	518.818	366.529	372.986	358.429	322.809	302.998	389.79	271.404	308.083	281.846	500.291	438.827	336.25	353.624	382.655	478.287
k__Bacteria;p__Firmicutes;c__Bacilli;o__Lactobacillales;f__Leuconostocaceae;g__Leuconostoc;s__Leuconostoc_sp._DORA_2	167.468	157.285	209.338	229.472	137.925	193.844	171.993	163.084	160.841	152.258	206.018	152.008	140.299	150.437	116.772	208.677	169.913	111.369	131.878	217.44	132.179	124.512	121.898	190.881	162.033	194.385	160.903	201.687	204.973	166.394	121.751	233.073	192.684	127.67	183.105	160.956	176.647	203.96	169.064	125.639	165.196	88.738	144.816	124	116.733	129.945	151.768	189.672
k__Bacteria;p__Firmicutes;c__Bacilli;o__Lactobacillales;f__Streptococcaceae;g__Lactococcus;s__Lactococcus_lactis	2	0	0	2	0	0	0	3	2	0	9	1	2	4	4	0	4	1	2	3	4	1.49	1	1	0	3	4	5	1	2	5	0	5	1	4	0	0	0	6	2	0	3	0	5	2	1	0	0
k__Bacteria;p__Firmicutes;c__Bacilli;o__Lactobacillales;f__Streptococcaceae;g__Streptococcus;s__Streptococcus_agalactiae	1893.58	2918.08	1939.96	2307.65	2063.46	1758.38	2039.09	1540.58	2046.8	1831.26	1917.62	2437.17	2978.64	2384.74	1604.65	2237.76	1599.73	1631.52	2090.61	2402	2044.57	2456.22	1707.98	2290.39	2324.58	1867.63	3767.92	2113.74	2162.38	2311.14	1850.31	2253.12	2302.86	1968.49	3063.36	1577.67	1490.55	3369.97	2874.68	1340.95	1891.97	1280.28	2443.14	2034.58	1593.2	1640.4	2158.16	2159.91
k__Bacteria;p__Firmicutes;c__Bacilli;o__Lactobacillales;f__Streptococcaceae;g__Streptococcus;s__Streptococcus_anginosus	21.44	793.616	2	0	0	353	0	11	3	1	0	3	1850.08	79	0	1	0	0	1	164	5	1	364.443	1	6	2	2489.93	117.934	3	13.616	0	0	0	202.035	1674.47	0	1	2741.61	0	2	1	0	0	4	0	0	1050.71	2
k__Bacteria;p__Firmicutes;c__Bacilli;o__Lactobacillales;f__Streptococcaceae;g__Streptococcus;s__Streptococcus_canis	0	0	0	0	0	0	0	0	0	0	0	0	0	0	0	0	0	0	0	0	6.172	0	0	0	0	0	0	0	0	0	0	0	0	0	0	0	0	0	0	0	0	0	0	0	0	0	0	0
k__Bacteria;p__Firmicutes;c__Bacilli;o__Lactobacillales;f__Streptococcaceae;g__Streptococcus;s__Streptococcus_constellatus	0	0	0	0	0	10	0	0	0	5	0	0	265.157	9	0	0	0	0	0	0	1	0	0	0	1	0	1	0	141	3	75	0	0	2	929.469	0	0	1548.93	0	3	351.423	10	435.379	2	0	0	3	1
k__Bacteria;p__Firmicutes;c__Bacilli;o__Lactobacillales;f__Streptococcaceae;g__Streptococcus;s__Streptococcus_cristatus	0	0	0	0	0	3	0	0	0	0	0	0	0	0	0	0	0	0	0	0	0	0	0	0	0	0	0	0	0	0	0	0	0	0	0	0	0	0	0	0	0	0	0	0	0	0	0	0
k__Bacteria;p__Firmicutes;c__Bacilli;o__Lactobacillales;f__Streptococcaceae;g__Streptococcus;s__Streptococcus_dysgalactiae	0	0	0	0	0	0	0	0	0	0	0	0	0	0	0	0	0	0	0	0	3	0	0	0	0	0	0	0	0	0	0	0	0	0	0	0	0	0	0	0	0	0	0	0	0	0	0	0
k__Bacteria;p__Firmicutes;c__Bacilli;o__Lactobacillales;f__Streptococcaceae;g__Streptococcus;s__Streptococcus_gordonii	100.151	89.505	87.98	142.81	94.936	132.675	145.11	110.92	83.08	115.964	122.007	166.114	129.793	155.285	72.061	159.685	115.785	120.536	134.327	174.309	139.194	175.923	63.862	160.062	113.4	127.475	138.305	121.219	186.192	155.198	104.234	157.458	133.744	100.849	86.994	117.065	83.528	74.3	82.493	60.138	104.368	82.83	128.856	107.827	96.276	88.22	149.539	98.834
k__Bacteria;p__Firmicutes;c__Bacilli;o__Lactobacillales;f__Streptococcaceae;g__Streptococcus;s__Streptococcus_halichoeri	0	0	0	0	0	0	0	0	0	0	0	0	0	0	0	0	0	0	0	0	0	0	0	0	0	0	0	0	0	0	0	0	0	0	0	0	0	0	62	0	0	0	0	0	0	0	0	0
k__Bacteria;p__Firmicutes;c__Bacilli;o__Lactobacillales;f__Streptococcaceae;g__Streptococcus;s__Streptococcus_intermedius	85.186	142.738	46.735	61.427	86.133	109.775	76.899	91.651	61.207	87.343	116.143	150.523	109.733	128.766	62.928	122.069	83.381	101.302	132.67	131.016	186.723	140.985	77.876	124.627	76.365	131.17	103.921	101.791	255.678	123.662	63.907	183.511	92.345	128.776	84.201	80.515	68.037	76.329	65.698	52.437	59.272	86.78	139.607	122.594	59.109	51.408	101.104	82.789
k__Bacteria;p__Firmicutes;c__Bacilli;o__Lactobacillales;f__Streptococcaceae;g__Streptococcus;s__Streptococcus_merionis	0	0	0	0	0	0	0	0	0	0	0	0	0	0	0	0	0	0	0	0	0	0	0	0	0	0	0	0	0	0	0	0	0	0	0	0	0	968.844	0	0	0	0	0	0	0	0	0	0
k__Bacteria;p__Firmicutes;c__Bacilli;o__Lactobacillales;f__Streptococcaceae;g__Streptococcus;s__Streptococcus_milleri	0	0	0	0	0	3	0	0	0	0	0	0	0	0	0	0	0	0	0	0	0	0	0	0	0	0	0	0	0	0	0	0	0	0	0	0	0	0	0	0	0	0	0	0	0	0	0	0
k__Bacteria;p__Firmicutes;c__Bacilli;o__Lactobacillales;f__Streptococcaceae;g__Streptococcus;s__Streptococcus_mitis	0	193.25	4	0	0	3	0	0	0	0	0	0	0	0	0	0	0	0	0	0	0	0	0	0	0	0	0	0	0	2	7	0	0	0	0	0	0	0	0	0	43	0	50	0	0	0	0	0
k__Bacteria;p__Firmicutes;c__Bacilli;o__Lactobacillales;f__Streptococcaceae;g__Streptococcus;s__Streptococcus_oralis	1878.21	1447.88	2160.46	2723.65	2064.3	2461.79	2313.5	1968.85	2249.62	2217.4	1853.44	2707.97	2434.78	2892.52	1580.68	2787.29	1779.62	1868.35	2657.92	2619.88	2303.53	2483.65	1469	2355.95	2177.31	2048.79	2694.43	2224.94	1996.33	2927.56	1872.69	2622.31	2666.38	2258.51	2125.69	1919.43	1727.67	1870	2032.37	1280.15	1793.5	1578.65	2341.47	2295.49	1872.32	2199.2	1886.81	2203.07
k__Bacteria;p__Firmicutes;c__Bacilli;o__Lactobacillales;f__Streptococcaceae;g__Streptococcus;s__Streptococcus_pasteurianus	0	0	0	0	0	3	0	0	0	0	0	0	0	0	0	0	0	0	0	0	0	0	0	0	0	0	0	0	0	0	0	0	0	0	0	0	0	0	0	0	0	0	0	0	0	0	0	0
k__Bacteria;p__Firmicutes;c__Bacilli;o__Lactobacillales;f__Streptococcaceae;g__Streptococcus;s__Streptococcus_periodonticum	0	0	0	0	0	6	0	0	0	0	0	0	0	0	0	0	0	0	0	0	0	0	0	0	0	0	0	0	0	0	0	0	0	0	0	0	0	0	0	0	0	0	0	0	0	0	0	0
k__Bacteria;p__Firmicutes;c__Bacilli;o__Lactobacillales;f__Streptococcaceae;g__Streptococcus;s__Streptococcus_pneumoniae	16306.7	17339.4	15629.2	21641.9	18862.8	14901.6	17829.1	13215.4	17288.7	14186.8	15427	18187.9	20540.6	23600.6	13533.5	20698.5	12359.9	12646.1	19360	21283.8	17216.4	18405	11679.6	17212.5	17732.1	12624.4	22306.3	16332.5	15689.2	18401.2	13453.8	19637.1	21086.2	14774.5	15310.9	12149.1	14689.7	16354.6	19033	11065	12644.4	10183.8	14629.8	17741.5	16126.7	13090.3	14089.7	19167.2
k__Bacteria;p__Firmicutes;c__Bacilli;o__Lactobacillales;f__Streptococcaceae;g__Streptococcus;s__Streptococcus_pyogenes	34.121	36.087	60	54.159	36.01	46.638	42	55.447	36	22.602	43.567	34.024	50.375	55	38.061	44.548	26.285	43.289	46.933	59.747	52.141	59	36	172.936	70.242	34	53	49.44	36.345	42.007	52.316	43.29	42.796	39	32.483	41.903	21	28	29.588	38.472	40.369	22.054	48.435	46	34.004	44.483	34.267	51.252
k__Bacteria;p__Firmicutes;c__Bacilli;o__Lactobacillales;f__Streptococcaceae;g__Streptococcus;s__Streptococcus_salivarius	171.89	1332.93	142.923	174.733	198.999	161.41	168.475	148.458	192.607	146.025	158.215	166.759	900.715	192.335	155.853	227	141.672	159.999	171.813	331.651	158.825	205	302.788	182	189.704	144.371	1173.77	198.521	145.596	229.943	196.002	192	253	203.883	756.891	145	197.948	1188.85	916.736	114.369	311.234	152.259	180.009	184	121.289	141.136	602.283	266.647
k__Bacteria;p__Firmicutes;c__Bacilli;o__Lactobacillales;f__Streptococcaceae;g__Streptococcus;s__Streptococcus_sp.	0	1	0	0	0	0	0	0	0	0	0	0	0	0	0	0	0	0	0	0	43	0	0	0	0	0	3	0	0	0	0	0	0	0	0	0	0	0	0	0	0	0	0	0	0	0	0	0
k__Bacteria;p__Firmicutes;c__Bacilli;o__Lactobacillales;f__Streptococcaceae;g__Streptococcus;s__Streptococcus_sp._ACC21	0	0	0	0	0	7	0	0	0	0	0	0	0	0	0	0	0	0	0	0	0	0	0	0	0	0	0	0	0	0	0	0	0	0	0	0	0	0	0	0	0	0	0	0	0	0	0	0
k__Bacteria;p__Firmicutes;c__Bacilli;o__Lactobacillales;f__Streptococcaceae;g__Streptococcus;s__Streptococcus_sp._BCA20	0	0	0	0	0	0	0	0	0	0	0	0	0	0	0	0	3	0	0	0	0	0	0	0	0	0	0	0	0	0	0	0	0	0	0	0	0	0	0	0	0	0	0	0	0	0	0	0
k__Bacteria;p__Firmicutes;c__Bacilli;o__Lactobacillales;f__Streptococcaceae;g__Streptococcus;s__Streptococcus_sp._F0442	0	0	0	0	0	0	11	0	0	0	0	0	0	0	0	0	0	0	0	144.849	0	0	0	0	0	0	0	0	0	0	0	0	0	0	0	0	74.53	0	0	0	0	0	0	0	0	0	0	0
k__Bacteria;p__Firmicutes;c__Bacilli;o__Lactobacillales;f__Streptococcaceae;g__Streptococcus;s__Streptococcus_sp._HMSC034A12	0	50	0	0	0	7	0	0	0	0	0	0	0	0	0	0	0	0	0	0	0	0	0	0	0	0	0	0	0	0	0	0	0	0	0	0	0	0	0	0	0	0	0	0	0	0	0	0
k__Bacteria;p__Firmicutes;c__Bacilli;o__Lactobacillales;f__Streptococcaceae;g__Streptococcus;s__Streptococcus_sp._HMSC034B03	0	0	0	0	0	3	0	0	0	0	0	0	0	0	0	0	0	0	0	0	0	0	0	0	0	0	0	0	0	0	0	0	0	0	0	0	0	0	0	0	0	0	0	0	0	0	0	3
k__Bacteria;p__Firmicutes;c__Bacilli;o__Lactobacillales;f__Streptococcaceae;g__Streptococcus;s__Streptococcus_sp._HMSC034E12	0	0	0	0	0	15	0	0	0	0	0	0	0	0	0	0	0	0	0	0	0	0	0	0	0	0	0	0	0	0	0	0	0	0	0	0	0	0	0	0	0	0	0	0	0	0	0	0
k__Bacteria;p__Firmicutes;c__Bacilli;o__Lactobacillales;f__Streptococcaceae;g__Streptococcus;s__Streptococcus_sp._HMSC034F02	0	0	0	0	0	5	0	0	0	0	0	0	0	0	0	0	0	0	0	0	0	0	0	0	0	0	0	0	0	0	0	0	0	0	0	0	0	0	0	0	0	0	0	0	0	0	0	0
k__Bacteria;p__Firmicutes;c__Bacilli;o__Lactobacillales;f__Streptococcaceae;g__Streptococcus;s__Streptococcus_sp._HMSC034F03	0	0	0	0	0	3	0	0	0	0	0	0	0	0	0	0	0	0	0	0	0	0	0	0	0	0	0	0	0	0	0	0	0	0	0	0	0	0	0	0	0	0	0	0	0	0	0	0
k__Bacteria;p__Firmicutes;c__Bacilli;o__Lactobacillales;f__Streptococcaceae;g__Streptococcus;s__Streptococcus_sp._HMSC056D07	0	0	0	0	0	3	0	0	0	0	0	0	0	0	0	0	0	0	0	0	0	0	0	0	0	0	0	0	0	0	0	0	0	0	0	0	0	0	0	0	0	0	0	0	0	0	0	0
k__Bacteria;p__Firmicutes;c__Bacilli;o__Lactobacillales;f__Streptococcaceae;g__Streptococcus;s__Streptococcus_sp._HMSC057E02	0	0	0	0	0	3	0	0	0	0	0	0	0	0	0	0	0	0	0	0	0	0	0	0	0	0	0	0	0	0	0	0	0	0	0	0	0	0	0	0	0	0	0	0	0	0	0	0
k__Bacteria;p__Firmicutes;c__Bacilli;o__Lactobacillales;f__Streptococcaceae;g__Streptococcus;s__Streptococcus_sp._HMSC066E07	0	0	0	0	0	6	0	0	0	0	0	0	0	0	0	0	0	0	0	0	0	0	0	0	0	0	0	0	0	0	0	0	0	0	0	0	0	0	0	0	0	0	0	0	0	0	0	0
k__Bacteria;p__Firmicutes;c__Bacilli;o__Lactobacillales;f__Streptococcaceae;g__Streptococcus;s__Streptococcus_sp._HMSC072D03	1	1	0	1	0	4	1	0	3	3	0	1.231	1	5	0	2	1	1	0	0	2	1	2	1	3	0	3	1	0	2	1	0	0	2	1	1	2	0	0	2	0	1	1	3	0	0	0	2
k__Bacteria;p__Firmicutes;c__Bacilli;o__Lactobacillales;f__Streptococcaceae;g__Streptococcus;s__Streptococcus_sp._HMSC073A12	0	0	0	0	0	3	0	0	0	0	0	0	0	0	0	0	0	0	0	0	0	0	0	0	0	0	0	0	0	0	0	0	0	0	0	0	0	0	0	0	0	0	0	0	0	0	0	0
k__Bacteria;p__Firmicutes;c__Bacilli;o__Lactobacillales;f__Streptococcaceae;g__Streptococcus;s__Streptococcus_sp._KR	0	0	0	0	0	0	4	0	0	0	0	0	1	0	0	0	0	0	0	0	0	0	0	0	0	0	0	0	0	0	0	0	0	0	0	0	32	0	0	0	0	0	0	0	0	0	0	0
k__Bacteria;p__Firmicutes;c__Bacilli;o__Lactobacillales;f__Streptococcaceae;g__Streptococcus;s__Streptococcus_sp._Marseille-P7375	0	0	0	0	0	0	2	0	0	0	0	0	0	0	0	0	0	0	0	29	0	0	0	0	0	0	0	0	0	0	0	0	0	0	0	0	5	0	0	0	0	0	0	0	0	0	0	0
k__Bacteria;p__Firmicutes;c__Bacilli;o__Lactobacillales;f__Streptococcaceae;g__Streptococcus;s__Streptococcus_sp._OBRC6	0	0	0	0	0	3	0	0	0	0	0	0	0	0	0	0	0	0	0	0	0	0	0	0	0	0	0	0	0	0	0	0	0	0	0	0	0	0	0	0	0	0	0	0	0	0	0	0
k__Bacteria;p__Firmicutes;c__Bacilli;o__Lactobacillales;f__Streptococcaceae;g__Streptococcus;s__Streptococcus_sp._WM07	13	8	4	10	13	11	1	5	8	5	6	7	2	7	3	13	2	7	6	7.269	7	6	2	7	5	3	6	6	4	7.267	10	6.071	5	7	9	6	4	5	3	3.323	5	1	2	4	5	7	9.133	3
k__Bacteria;p__Firmicutes;c__Bacilli;o__Lactobacillales;f__Streptococcaceae;g__Streptococcus;s__Streptococcus_sp._group_G	0	0	0	0	1	3	2	1	0	0	0	1	1	0	0	0	0	0	1	0	0	0	0	2	0	0	0	3	0	0	3	0	1	0	0	0	0	0	1	0	0	0	0	2	0	0	0	0
k__Bacteria;p__Firmicutes;c__Bacilli;o__Lactobacillales;f__Streptococcaceae;g__Streptococcus;s__Streptococcus_sp._oral_taxon_431	8.56	0	0	0	0	0	0	7	0	1	2	1	1515.14	71	0	2	0	0	0	120	1	0	321.386	0	2	3	2102.38	82.474	0	9.384	1	0	0	162.314	1323.67	1	1	2320.89	2	2	1	3	1	2	0	0	858.868	1
k__Bacteria;p__Firmicutes;c__Bacilli;o__Lactobacillales;f__Streptococcaceae;g__Streptococcus;s__Streptococcus_suis	0	0	0	0	0	0	0	0	0	0	0	0	0	0	0	0	0	0	0	6	0	0	515.011	1	0	0	184	1	0	0	0	0	0	0	0	1	3	0	0	0	0	0	0	0	0	0	0	15
k__Bacteria;p__Firmicutes;c__Bacilli;o__Lactobacillales;f__Streptococcaceae;g__Streptococcus;s__Streptococcus_thermophilus	9	1267.25	7	5	10	12	4	6	23.299	10	5	7	700.737	27	5	12	6	12	5	81	18	11	163.242	10	52	12	1001.58	57	5	19	43.456	10.763	41	85	658.364	4	28	1029.55	694.93	5	163	27	1	8	5	4	414.117	119
k__Bacteria;p__Firmicutes;c__Bacilli;o__Lactobacillales;f__Streptococcaceae;g__Streptococcus;s__Streptococcus_vestibularis	104.303	84.37	109.53	121.304	113	131.23	120.44	92.349	139.475	119.482	101.642	117.465	104	131	92.173	115.52	85.054	109.127	135	148.287	88.702	107.85	84.11	129.447	110.252	133.071	123.324	112	92.367	129.346	90.382	126.376	138.198	87.646	175.122	73.642	90.766	275.649	106.791	61.716	77.143	85.266	124.978	91.531	97.963	83.087	90.488	109.973
k__Bacteria;p__Firmicutes;c__Bacilli;o__Lactobacillales;f__Streptococcaceae;g__Streptococcus;s__Streptococcus_viridans	0	0	0	0	0	0	1	0	0	0	0	0	0	0	0	0	0	0	0	15.059	0	0	0	0	0	0	0	0	0	0	0	0	0	0	184	0	9	242.372	0	0	0	0	0	0	0	0	0	0
k__Bacteria;p__Firmicutes;c__Bacilli;o__Lactobacillales;f__unclassified;g__unclassified;s__Lactobacillaceae_bacterium	0	0	0	0	0	1	0	20	0	0	0	1	69	0	0	0	0	2	0	0	0	0	0	0	1	0	0	0	0	0	19	0	0	0	129.268	0	0	0	0	1	0	1	121.639	2	0	0	1100.53	3
k__Bacteria;p__Firmicutes;c__Clostridia;o__Clostridiales;f__Clostridiaceae;g__Clostridium;s__Clostridium_beijerinckii	0	0	0	0	0	0	0	0	0	0	0	0	0	0	0	0	0	0	0	0	6	0	0	0	0	0	0	0	0	0	0	0	0	0	0	0	0	0	0	0	0	0	0	0	0	0	0	0
k__Bacteria;p__Firmicutes;c__Clostridia;o__Clostridiales;f__Clostridiaceae;g__Clostridium;s__Clostridium_botulinum	50.016	60.343	60.746	79.066	65.055	67.406	54.722	56.651	53.915	56.392	69.81	112.43	58.902	56.494	40.588	62.024	42.304	81.03	87.217	79.215	67.263	98.663	42.077	70.715	79.886	65.721	77.439	56.711	78.889	96.874	68.869	77.892	83.628	50.315	50.588	48.837	39.089	51.683	101.473	45.242	69.56	58.658	49.613	67.964	59.113	47.537	55.383	70.413
k__Bacteria;p__Firmicutes;c__Clostridia;o__Clostridiales;f__Clostridiaceae;g__Clostridium;s__Clostridium_butyricum	3	8.304	5.694	8.733	11	5	11	4.448	10.56	3.559	5	10.733	3	10	7	3.99	6	4.616	4	6.293	10	3	1	11.425	10.633	10	4.744	4.576	13.589	6	3	12	11.37	1	12	5.337	1.148	7	4.621	8.764	4	1.16	10.371	6	13	5	4.258	7.702
k__Bacteria;p__Firmicutes;c__Clostridia;o__Clostridiales;f__Clostridiaceae;g__Clostridium;s__Clostridium_ljungdahlii	0	0	0	0	0	0	0	0	0	0	0	0	0	0	0	0	0	0	0	0	0	0	0	0	1	0	7	1	0	2	0	0	0	0	0	0	0	0	0	0	0	0	0	0	0	0	0	0
k__Bacteria;p__Firmicutes;c__Clostridia;o__Clostridiales;f__Clostridiaceae;g__Clostridium;s__Clostridium_perfringens	71.58	51.519	72.433	89.794	48.714	33.384	78.977	64.793	85.545	68.023	80.156	69.625	71.106	71.473	58.718	89.793	42.495	85.865	83.572	82.232	66.236	78.185	45.298	56.179	65.357	62.833	66.673	70.727	64.446	93.367	64.56	73.727	86.073	63.669	54.044	62.162	59.801	37.238	62.636	50.688	65.092	34.627	59.482	60.664	51.863	33.344	61.826	60.452
k__Bacteria;p__Firmicutes;c__Clostridia;o__Clostridiales;f__Clostridiaceae;g__Clostridium;s__Clostridium_sp.	0	1	7	0	0	1	0	2	0	0	3	0	0	0	0	4	0	0	0	0	0	3	0	0	8	0	9	5	4	11	6	0	2	0	1	0	0	1	0	1	0	0	0	0	0	0	1	1
k__Bacteria;p__Firmicutes;c__Clostridia;o__Clostridiales;f__Clostridiaceae;g__Clostridium;s__Clostridium_sp._C2-6-12	0	0	0	0	0	0	0	0	0	0	0	0	0	0	0	0	0	0	0	0	0	0	0	0	1	0	0	0	1	3	1	0	0	0	0	0	0	0	0	0	0	0	0	0	0	0	0	0
k__Bacteria;p__Firmicutes;c__Clostridia;o__Clostridiales;f__Clostridiaceae;g__Clostridium;s__Clostridium_sp._NSJ-49	0	0	0	0	0	0	0	0	0	0	0	0	4	0	0	0	0	0	0	0	0	0	0	0	0	0	0	0	0	0	0	0	0	0	0	0	0	0	0	0	0	0	0	0	0	0	0	0
k__Bacteria;p__Firmicutes;c__Clostridia;o__Clostridiales;f__Clostridiaceae;g__Clostridium;s__Clostridium_sp._W14A	26.318	9	37.2	28.093	24.695	19	23.363	17.474	27	21.039	28.06	26.877	22.44	24.477	23.644	27.148	13	33	27.064	19.005	23.561	27.298	19.913	39.658	33.532	36.687	32	29.266	23	27	26.347	32.525	34.817	16.897	31.131	36.549	17	22	20.247	20	20.825	11	30.737	27	27	24.756	23.312	15
k__Bacteria;p__Firmicutes;c__Clostridia;o__Clostridiales;f__Clostridiaceae;g__unclassified;s__Clostridiaceae_bacterium	67	1	51.271	4	0	1	1	0	2	0	0	1	2	0	0	1	3	1	0	0	0	0	0	1	144.171	0	162.572	122	83.809	114.352	136.376	5	0	3	8	2	7	2	1	4	0	1	1	0	1	0	0	0
k__Bacteria;p__Firmicutes;c__Clostridia;o__Clostridiales;f__Clostridiales_Family_XIII._Incertae_Sedis;g__Emergencia;s__Emergencia_sp._1XD21-50	5	0	7	0	0	0	0	0	0	0	0	0	0	0	0	0	0	0	0	0	0	0	0	0	16	0	24	12	16	14	14	0	0	0	0	0	0	0	0	0	0	0	0	0	0	0	0	0
k__Bacteria;p__Firmicutes;c__Clostridia;o__Clostridiales;f__Clostridiales_Family_XIII._Incertae_Sedis;g__unclassified;s__[Eubacterium]_saphenum	0	0	0	0	0	0	0	0	0	0	0	0	0	0	0	0	0	0	0	0	0	0	0	0	0	0	11	0	0	0	0	0	0	0	0	0	0	0	0	0	0	0	0	0	0	0	0	0
k__Bacteria;p__Firmicutes;c__Clostridia;o__Clostridiales;f__Clostridiales_Family_XIII._Incertae_Sedis;g__unclassified;s__[Eubacterium]_sulci	0	0	0	0	0	0	0	0	0	0	0	0	0	0	0	0	0	0	0	0	0	0	0	0	0	0	0	0	0	0	0	0	0	0	0	0	0	0	0	0	0	3	0	0	0	0	0	0
k__Bacteria;p__Firmicutes;c__Clostridia;o__Clostridiales;f__Eubacteriaceae;g__Eubacterium;s__Eubacterium_callanderi	0	0	0	0	0	0	0	0	0	0	0	0	1.369	0	0	0	0	0	0	0	0	0	0	140.806	0	0	0	0	0	2	19	0	0	0	0	0	0	0	0	0	107.818	0	152.414	0	0	0	1	1
k__Bacteria;p__Firmicutes;c__Clostridia;o__Clostridiales;f__Hungateiclostridiaceae;g__Fastidiosipila;s__Fastidiosipila_sanguinis	2	0	0	0	0	0	0	0	0	0	0	0	0	0	0	0	0	0	0	0	0	0	0	0	0	0	3	4.576	0	0	0	0	1.254	0	0	0	0	0	0	0	0	0	0	0	0	0	0	11
k__Bacteria;p__Firmicutes;c__Clostridia;o__Clostridiales;f__Hungateiclostridiaceae;g__Mageeibacillus;s__Mageeibacillus_indolicus	0	1196.8	0	0	0	0	0	7	0	0	0	6.954	7	19	0	0	0	0	0	0	17	0	0	297.952	1	1	2	0	0	0	19.148	0	0	0	0	0	0	0	1	0	0	0	1	0	0	0	402.855	0
k__Bacteria;p__Firmicutes;c__Clostridia;o__Clostridiales;f__Hungateiclostridiaceae;g__Ruminiclostridium;s__Ruminiclostridium_papyrosolvens	0	0	0	0	0	0	0	0	0	0	0	0	0	0	0	0	0	0	0	0	0	0	0	0	0	0	6	0	0	0	0	0	0	0	0	0	0	0	0	0	0	0	0	0	0	0	0	0
k__Bacteria;p__Firmicutes;c__Clostridia;o__Clostridiales;f__Lachnospiraceae;g__Blautia;s__Blautia_wexlerae	1	1	1	0	0	1	1	1	3	0	3	0	0	3	1	5	0	0	2	4	1	1	0	0	0	0	0	0	2	2	0	1	1	0	0	0	0	0	0	2	1	0	1	0	4	0	1	0
k__Bacteria;p__Firmicutes;c__Clostridia;o__Clostridiales;f__Lachnospiraceae;g__Blautia;s__uncultured_Blautia_sp.	3	0	0	0	0	0	0	1	0	1	0	2	0	0	1	0	1	0	0	0	0	0	0	1	0	1	0	0	0	0	0	0	1	0	0	0	0	0	0	1	1	0	2	1	1	0	0	0
k__Bacteria;p__Firmicutes;c__Clostridia;o__Clostridiales;f__Lachnospiraceae;g__Butyrivibrio;s__Butyrivibrio_sp._XB500-5	188.127	177.713	156.544	230.904	182.097	234.204	191.019	199.217	160.303	162.533	177.284	211.143	180.392	174.706	154.711	169.477	161.085	163.487	185.565	212.245	188.736	210.028	182.569	158.692	181.537	178.791	191.599	187.928	192.023	228.965	143.317	184.612	162.891	109.175	163.493	181.273	105.198	133.587	289.013	142.388	135.323	101.021	186.999	137.496	172.097	161.346	139.178	138.463
k__Bacteria;p__Firmicutes;c__Clostridia;o__Clostridiales;f__Lachnospiraceae;g__Dorea;s__Dorea_sp._5-2	0	0	0	0	0	0	0	0	0	0	0	0	0	0	0	0	0	0	0	0	0	0	0	0	0	0	0	0	0	0	0	3	0	0	0	0	0	0	0	0	0	0	0	0	0	0	0	0
k__Bacteria;p__Firmicutes;c__Clostridia;o__Clostridiales;f__Lachnospiraceae;g__Epulopiscium;s__Epulopiscium_sp._AS2M-Bin001	1	0	1	1	0	0	0	2	0	2	2	0	0	0	0	0	5	4	0	0	0	0	1	0	0	0	0	1	0	0	2	0	0	0	0	0	0	0	0	0	1	2	1	0	0	0	0	0
k__Bacteria;p__Firmicutes;c__Clostridia;o__Clostridiales;f__Lachnospiraceae;g__Epulopiscium;s__Epulopiscium_sp._Nele67-Bin001	0	1	1	1	1	1	0	1	1	0	1	0	0	0	1	1	1	1	1	1	0	0	0	0	1	0	0	1	0	0	1	0	0	1	1	0	0	1	8	0	1	0	0	2	0	0	0	0
k__Bacteria;p__Firmicutes;c__Clostridia;o__Clostridiales;f__Lachnospiraceae;g__Epulopiscium;s__Epulopiscium_sp._SCG-B11WGA-EpuloA1	0	6	5	2	0	2	1	2	3	0	8	4	0	2	0	2	1	1	0	3	0	2	0	4	0	3	2	0	1.093	2	0	3	1	1	0	0	0	1	2	1	0	2	6	1	2	0	0	0
k__Bacteria;p__Firmicutes;c__Clostridia;o__Clostridiales;f__Lachnospiraceae;g__Lacrimispora;s__Lacrimispora_aerotolerans	4	0	1	0	0	0	0	2	1	0	1	0	1	7	0	1.594	0	0	1	0	0	0	0	2	4	0	0	0	0	2	3	1	1	0	0	0	0	0	1	0	1	0	2	0	0	0	0	0
k__Bacteria;p__Firmicutes;c__Clostridia;o__Clostridiales;f__Lachnospiraceae;g__Mobilisporobacter;s__Mobilisporobacter_senegalensis	0	0	0	0	0	0	0	0	0	0	0	0	0	0	0	0	0	0	0	0	5	0	0	0	0	0	0	0	0	0	0	0	0	0	0	0	0	0	0	0	0	0	0	0	0	0	0	0
k__Bacteria;p__Firmicutes;c__Clostridia;o__Clostridiales;f__Lachnospiraceae;g__Oribacterium;s__Oribacterium_sp._oral_taxon_102	0	0	0	0	0	0	0	0	0	3	0	0	0	0	0	0	0	0	0	0	0	0	0	0	2	0	0	0	0	0	0	0	0	1	936.482	0	0	1386.7	0	0	1	0	0	0	0	0	1	0
k__Bacteria;p__Firmicutes;c__Clostridia;o__Clostridiales;f__Lachnospiraceae;g__unclassified;s__Lachnospiraceae_bacterium	26	2	29	3	4	0	1	1	2	1	2	0	0	2	0	4	2	0	0	4	0	0	0	2	45.543	3	56.201	33.472	34.471	51.736	59.322	2	1	0	1	0	4	2	3	1	33	1	46	1	1	0	0	6
k__Bacteria;p__Firmicutes;c__Clostridia;o__Clostridiales;f__Lachnospiraceae;g__unclassified;s__Lachnospiraceae_bacterium_oral_taxon_082	2	0	0	0	0	0	0	0	0	0	0	0	0	0	0	0	0	0	0	1.255	0	0	22	0	0	0	0	15.804	0	0	0	0	0	0	0	0	2.718	0	0	0	0	0	0	0	0	0	0	22
k__Bacteria;p__Firmicutes;c__Clostridia;o__Clostridiales;f__Lachnospiraceae;g__unclassified;s__[Eubacterium]_rectale	0	0	0	0	0	0	0	0	0	0	0	0	0	0	0	0	0	0	0	0	0	0	0	0	0	0	0	0	0	0	0	0	0	0	0	3	0	0	0	0	0	0	0	0	0	0	0	0
k__Bacteria;p__Firmicutes;c__Clostridia;o__Clostridiales;f__Peptococcaceae;g__Desulfitobacterium;s__Desulfitobacterium_hafniense	0	0	0	1	2	0	0	1	0	1	0	0	0	1	0	0	0	0	0	0	0	0	3	0	0	0	0	2	0	1	0	0	0	2	2	0	0	3	0	1	3	0	0	0	2	1	5	1
k__Bacteria;p__Firmicutes;c__Clostridia;o__Clostridiales;f__Peptococcaceae;g__Desulfocucumis;s__Desulfocucumis_palustris	1	0	0	2	0	0	1	3	0	1	3	2	3	0	0	1	2	0	0	0	0	1	0	2	1	0	1	2	0	2	2	8	2	1	0	0	0	0	1.022	0	0	0	0	0	0	0	2	1
k__Bacteria;p__Firmicutes;c__Clostridia;o__Clostridiales;f__Peptococcaceae;g__Desulfosporosinus;s__Desulfosporosinus_sp._BRH_c37	1	0	3.506	0	0	0	0	0	0	0	0	0	0	0	0	0	0	0	0	0	0	0	0	0	6	0	7.239	3.495	5.362	5.581	4	0	0	0	0	0	0	0	0	0	0	0	0	0	0	0	0	0
k__Bacteria;p__Firmicutes;c__Clostridia;o__Clostridiales;f__Peptostreptococcaceae;g__Clostridioides;s__Clostridioides_difficile	1308.04	1006.73	1239.02	1473.65	1175.54	1214.17	1235.01	1073.95	1322.79	1208.68	1286.6	1407.58	1402.43	1575.88	1153.72	1445.81	1091.01	1215.48	1298.75	1604.02	1266.78	1453.26	1084.34	1411.8	1381.25	1107.02	1550.88	1410.09	1255.43	1520.84	1169.71	1510.03	1582.49	1037.85	1220.93	1011.37	963.206	986.872	1316.5	882.906	1027.94	879.376	1459.73	1352.88	1031.05	1082.94	1128	1329.06
k__Bacteria;p__Firmicutes;c__Clostridia;o__Clostridiales;f__Peptostreptococcaceae;g__Filifactor;s__Filifactor_alocis	0	158.836	0	0	0	0	2	0	0	0.096	0	0	0	1.413	0	0	0	0	0	1	3	0	0	0	0	0	121.727	0	0	2	41	0	0	21.646	82.797	0	0	119.848	0	0	273	1	383	0	1	0	0	1
k__Bacteria;p__Firmicutes;c__Clostridia;o__Clostridiales;f__Peptostreptococcaceae;g__Paeniclostridium;s__Paeniclostridium_sordellii	2	0	0	4	2	4	1	5	1	1	1	1	3	0	2	0	4	1	3	0	3	0	3	8	0	1	0	6	0	2	1	7	1	1	0	1	0	1	1	0	1	1	0	1	1	6	1	0
k__Bacteria;p__Firmicutes;c__Clostridia;o__Clostridiales;f__Peptostreptococcaceae;g__Paraclostridium;s__Paraclostridium_benzoelyticum	33.488	22.094	36.361	50.197	19.782	23.622	45.186	27.19	22.471	23.518	34.671	40.125	33.934	51.091	22.321	28.217	34.195	34.49	26.665	51.808	29.586	33.684	28.627	29.093	44.438	40.619	31.272	35.39	28.049	24.686	25.84	42.253	34.809	26.448	37.172	34.998	28.552	36.352	25.293	19.313	29.423	16.344	26.414	31.847	33.019	25.293	26.68	26.163
k__Bacteria;p__Firmicutes;c__Clostridia;o__Clostridiales;f__Peptostreptococcaceae;g__Paraclostridium;s__Paraclostridium_sp._SKVG24	3	0	4	0	4	1	0	2	4	2	0	4	1	6	0	2	3	1	3	4	2	1	6	2	5	2	4	1	2	7	2	3	6	0	3	4	3	0	1	4	0	0	4	1	2	2	4	4
k__Bacteria;p__Firmicutes;c__Clostridia;o__Clostridiales;f__Peptostreptococcaceae;g__Peptostreptococcus;s__Peptostreptococcus_anaerobius	4	91.862	0	0	0	0	0	0	4	0	0	0	54.168	4	1	0	0	0	0	2.505	2.502	0	253.049	1	0	0	73.865	2	0	1	1	0	0	8	61.558	0	3.694	81.097	43.281	0	6.381	0	0	0	0	0	32.654	7.621
k__Bacteria;p__Firmicutes;c__Clostridia;o__Clostridiales;f__Peptostreptococcaceae;g__Terrisporobacter;s__Terrisporobacter_glycolicus	0	0	0	1	0	3	0	0	0	0	0	0	0	0	0	0	0	0	0	0	0	0	0	0	0	1	0	0	0	0	0	0	0	1	0	0	2	0	1	1	0	1	0	0	0	0	0	0
k__Bacteria;p__Firmicutes;c__Clostridia;o__Clostridiales;f__Peptostreptococcaceae;g__unclassified;s__Peptostreptococcaceae_bacterium_oral_taxon_929	0	0	0	0	0	0	0	0	0	0	0	0	0	0	0	0	0	0	0	0	0	0	0	0	0	0	3	0	0	0	0	0	0	0	0	0	0	0	0	0	0	0	0	0	0	0	0	0
k__Bacteria;p__Firmicutes;c__Clostridia;o__Clostridiales;f__Ruminococcaceae;g__Acutalibacter;s__Acutalibacter_muris	0	0	0	0	0	0	0	0	0	0	0	8	0	0	0	0	0	0	0	0	0	0	0	0	0	0	0	0	0	0	0	0	0	0	0	0	0	0	0	0	0	0	0	0	0	0	0	0
k__Bacteria;p__Firmicutes;c__Clostridia;o__Clostridiales;f__Ruminococcaceae;g__Anaerofilum;s__Anaerofilum_sp._BX8	0	0	0	0	0	0	0	0	0	0	0	0	0	0	0	0	0	0	0	0	0	0	0	0	0	0	3	0	0	0	1	0	0	0	0	0	0	0	0	0	0	0	0	0	0	0	0	0
k__Bacteria;p__Firmicutes;c__Clostridia;o__Clostridiales;f__Ruminococcaceae;g__Anaerotruncus;s__Anaerotruncus_sp._1XD22-93	0	0	0	0	0	0	0	0	0	0	0	0	0	39.488	0	0	0	0	0	0	0	0	0	0	0	0	0	0	0	0	0	0	0	0	0	0	0	0	0	0	0	0	0	0	0	0	0	0
k__Bacteria;p__Firmicutes;c__Clostridia;o__Clostridiales;f__Ruminococcaceae;g__Neglecta;s__Neglecta_sp._X58	0	0	0	0	0	0	0	0	0	0	0	0	0	0	0	0	0	0	0	0	0	0	0	0	0	0	0	0	0	0	0	0	1	7	10	3	4	0	0	0	0	0	0	0	0	0	0	0
k__Bacteria;p__Firmicutes;c__Clostridia;o__Clostridiales;f__Ruminococcaceae;g__Ruminococcus;s__Ruminococcus_bromii	0	0	0	0	0	0	0	0	0	0	0	1	383.923	0	0	0	0	0	0	0	0	0	0	0	0	0	0	0	0	0	0	0	0	0	0	0	0	0	0	0	0	0	0	0	0	0	0	0
k__Bacteria;p__Firmicutes;c__Clostridia;o__Clostridiales;f__Ruminococcaceae;g__Ruminococcus;s__Ruminococcus_gauvreauii	2	1	1	2	0	0	0	1	1	0	1	0	0	0	0	0	1	2	5	1	0	0	0	1	0	0	2	0	1	0	0	0	0	0	0	0	0	1	0	0	1	0	0	0	0	0	0	1
k__Bacteria;p__Firmicutes;c__Clostridia;o__Clostridiales;f__Ruminococcaceae;g__Ruminococcus;s__Ruminococcus_sp._AM22-14LB	0	0	0	0	0	0	0	0	0	0	0	0	0	1	0	0	0	0	0	0	0	0	0	0	0	0	4	0	0	0	0	0	0	0	0	0	0	0	0	0	0	0	0	0	0	0	0	0
k__Bacteria;p__Firmicutes;c__Clostridia;o__Clostridiales;f__Ruminococcaceae;g__Ruminococcus;s__Ruminococcus_sp._NSJ-71	0	0	0	0	0	0	0	0	0	0	1	0	406.78	1	0	0	0	0	0	0	0	0	0	0	0	0	0	0	0	0	0	0	0	0	0	0	0	0	0	0	0	0	0	0	0	0	0	0
k__Bacteria;p__Firmicutes;c__Clostridia;o__Clostridiales;f__Ruminococcaceae;g__unclassified;s__Ruminococcaceae_bacterium	0	0	0	0	0	0	0	0	3	0	0	0	0	0	0	3	0	2	1	7	0	0	0	0	0	0	0	0	1	0	0	0	1	1	0	0	0	4	0	0	0	0	0	0	0	1	0	1
k__Bacteria;p__Firmicutes;c__Clostridia;o__Clostridiales;f__Ruminococcaceae;g__unclassified;s__Ruminococcaceae_bacterium_HV4-5-B5C	15.22	10.175	26.738	26	22	15	12.708	8.829	17.831	20.819	22	19.728	26.425	19	11.256	19.128	19.303	16.387	29.267	14.856	15.587	31.192	10.201	27	12.18	20.857	14.343	19.627	25.857	34.715	11	25.126	24.488	22.209	23.382	18.148	7.272	13	12.386	12	16	9	8.945	19	25.678	22.336	17	16.811
k__Bacteria;p__Firmicutes;c__Clostridia;o__Clostridiales;f__Syntrophomonadaceae;g__unclassified;s__Syntrophomonadaceae_bacterium	3	0	0	0	0	0	0	0	0	0	0	0	0	0	0	0	0	0	0	0	0	0	0	0	1	0	0	0	0	0	2	0	0	0	0	0	0	0	0	0	0	0	0	0	0	0	0	0
k__Bacteria;p__Firmicutes;c__Clostridia;o__Clostridiales;f__unclassified;g__Fenollaria;s__Fenollaria_timonensis	4	0	0	0	0	0	0	0	0	1	0	0	0	0	0	0	0	0	0	0	0	0	0	0	0	0	1	25	0	5	0	0	0	0	0	0	0	0	0	0	0	14.734	0	1	0	0	0	0
k__Bacteria;p__Firmicutes;c__Clostridia;o__Clostridiales;f__unclassified;g__Neofamilia;s__Neofamilia_massiliensis	0	0	0	0	0	0	0	1	2.281	1	0	0	94.961	6.535	0	0	0	0	0	0	0	1	0	0	0	0	0	3	55.666	0	8.291	0	5	0	0	0	0	0	125.967	0	29.947	3	35	0	0	0	86.997	1
k__Bacteria;p__Firmicutes;c__Clostridia;o__Clostridiales;f__unclassified;g__unclassified;s__Clostridiales_bacterium	475.315	262.057	289.981	594.609	651.1	450.676	369.396	333.926	384.785	392.964	418.241	708.285	484.457	580.492	362.094	458.618	307.174	223.872	480.934	504.242	589.433	625.995	350.594	648.876	543.264	463.932	461.898	402.84	295.681	365.772	403.323	394.158	248.546	467.106	342.645	394.011	348.916	282.977	644.012	305.565	345.212	280.415	395.22	412.351	346.739	361.948	320.923	346.994
k__Bacteria;p__Firmicutes;c__Clostridia;o__Clostridiales;f__unclassified;g__unclassified;s__Clostridiales_bacterium_1_7_47FAA	1	1	7	4	4	2	1	1	2	7	4	1	3	8	4	0	0	8	6	5	2	2	5	1	14	2	0	3	3	3.001	4	2	3	3	4	4	1	1	1	0	0	2	7	5	3	6	3	5
k__Bacteria;p__Firmicutes;c__Clostridia;o__Clostridiales;f__unclassified;g__unclassified;s__Clostridiales_bacterium_KA00274	1	0	0	0	0	0	0	0	0	0	1	1	0	0	0	1	0	0	0	0	30	0	0	59	0	0	0	0	0	0	0	0	0	0	0	0	0	0	0	0	0	0	0	1	0	0	0	0
k__Bacteria;p__Firmicutes;c__Clostridia;o__Thermoanaerobacterales;f__Thermoanaerobacteraceae;g__unclassified;s__Thermoanaerobacteraceae_bacterium	0	0	0	0	0	0	0	0	0	0	0	0	0	0	0	0	0	0	0	0	0	0	0	0	0	0	0	0	1	3	0	0	0	0	0	0	0	0	0	0	0	0	0	0	0	0	0	0
k__Bacteria;p__Firmicutes;c__Clostridia;o__Thermoanaerobacterales;f__Zhaonellaceae;g__Zhaonella;s__Zhaonella_formicivorans	0	0	0	0	0	0	0	0	0	0	0	0	0	0	0	0	0	0	0	0	0	0	0	0	4	0	1	0	1	0	6	0	0	0	0	0	0	0	0	0	0	0	0	0	0	0	0	0
k__Bacteria;p__Firmicutes;c__Clostridia;o__unclassified;f__unclassified;g__unclassified;s__Clostridia_bacterium	0	0	0	0	0	0	0	0	0	0	0	0	0	0	0	0	0	0	0	0	21.571	0	0	0	0	0	0	0	0	0	0	0	0	0	0	0	0	0	0	0	0	0	0	0	0	0	0	0
k__Bacteria;p__Firmicutes;c__Erysipelotrichia;o__Erysipelotrichales;f__Erysipelotrichaceae;g__Eggerthia;s__Eggerthia_catenaformis	0	0	0	0	0	0	0	0	0	0	0	0	0	0	0	0	0	0	0	0	5	0	0	0	0	0	97.651	0	0	2	2	0	0	0	0	0	0	0	0	0	0	0	0	0	0	0	0	0
k__Bacteria;p__Firmicutes;c__Erysipelotrichia;o__Erysipelotrichales;f__Erysipelotrichaceae;g__Erysipelothrix;s__Erysipelothrix_rhusiopathiae	0	0	0	3	0	2	1	0	1	1	1	2	0	1	2	0	0	0	0	2	0	0	0	0	0	1	0	2	0	5	2	1	0	0	0	0	0	2	1	0	0	0	0	0	0	0	0	0
k__Bacteria;p__Firmicutes;c__Erysipelotrichia;o__Erysipelotrichales;f__Erysipelotrichaceae;g__Holdemania;s__Holdemania_sp._Marseille-P2844	0	0	0	0	0	0	0	0	0	0	0	0	0	0	0	0	0	0	0	0	13.704	0	0	0	0	0	0	0	0	0	0	0	0	0	0	0	0	0	0	0	0	0	0	0	0	0	0	0
k__Bacteria;p__Firmicutes;c__Erysipelotrichia;o__Erysipelotrichales;f__Erysipelotrichaceae;g__unclassified;s__Erysipelotrichaceae_bacterium	0	0	0	0	0	0	0	0	0	1	2	0	0	0	0	4	0	0	1	0	1	2	1	0	0	0	0	2	0	0	0	1	0	1	0	0	1	1	0	0	1	0	0	0	1	1	0	0
k__Bacteria;p__Firmicutes;c__Erysipelotrichia;o__unclassified;f__unclassified;g__unclassified;s__Erysipelotrichia_bacterium	0	0	3	0	0	0	0	0	0	0	0	0	0	0	0	0	0	0	0	0	0	0	0	0	0	0	0	2	0	0	0	0	0	0	0	0	0	0	0	0	0	0	0	0	0	0	0	0
k__Bacteria;p__Firmicutes;c__Negativicutes;o__Acidaminococcales;f__Acidaminococcaceae;g__unclassified;s__Acidaminococcaceae_bacterium	0	0	0	0	0	0	0	0	0	0	0	0	0	0	0	0	0	0	0	0	3.429	0	0	0	0	0	0	0	0	0	0	0	0	0	0	0	0	0	0	0	0	0	0	0	0	0	0	0
k__Bacteria;p__Firmicutes;c__Negativicutes;o__Selenomonadales;f__Selenomonadaceae;g__Megamonas;s__Megamonas_funiformis	0	0	0	0	0	0	0	0	0	0	0	0	0	0	0	0	0	0	0	0	3.828	0	0	0	0	0	0	0	0	0	0	0	0	0	0	0	0	0	0	0	0	0	0	0	0	0	0	0
k__Bacteria;p__Firmicutes;c__Negativicutes;o__Selenomonadales;f__Selenomonadaceae;g__Mitsuokella;s__Mitsuokella_sp._AF21-1AC	6	0	2	0	0	0	0	0	0	0	0	0	1	0	1	0	0	0	0	0	0	0	0	0	0	0	0	0	0	0	0	0	0	0	0	0	0	0	0	0	0	0	0	2	0	0	0	0
k__Bacteria;p__Firmicutes;c__Negativicutes;o__Selenomonadales;f__Selenomonadaceae;g__Pectinatus;s__Pectinatus_frisingensis	0	0	0	0	0	0	0	0	0	0	0	0	0	0	0	0	0	0	0	0	0	0	0	0	1	0	1	1	695.814	1	0	0	0	0	0	0	0	0	0	0	0	0	0	0	0	0	0	0
k__Bacteria;p__Firmicutes;c__Negativicutes;o__Selenomonadales;f__Selenomonadaceae;g__Selenomonas;s__Selenomonas_artemidis	0	0	0	0	0	0	0	0	0	0	0	0	0	0	0	0	0	0	0	0	3	0	0	0	0	0	0	0	0	0	0	0	0	0	0	0	0	0	0	0	0	0	0	0	0	0	0	0
k__Bacteria;p__Firmicutes;c__Negativicutes;o__Veillonellales;f__Veillonellaceae;g__Anaeroglobus;s__Anaeroglobus_geminatus	0	0	0	0	0	0	0	0	0	0	0	0	0	0	0	0	0	0	0	0	5	0	0	0	0	0	0	0	0	0	0	0	0	0	0	0	0	0	0	0	0	0	0	0	0	0	0	0
k__Bacteria;p__Firmicutes;c__Negativicutes;o__Veillonellales;f__Veillonellaceae;g__Dialister;s__Dialister_micraerophilus	0	6	3	1	0	0	0	0	0	0	0	3	0	0	0	0	0	0	0	0	11.413	0	0	0	8	0	0	0	0	0	0	0	0	0	0	0	0	0	0	0	0	0	0	0	0	0	0	0
k__Bacteria;p__Firmicutes;c__Negativicutes;o__Veillonellales;f__Veillonellaceae;g__Dialister;s__Dialister_sp.	0	3	0	0	0	0	0	0	0	0	0	0	0	0	0	0	0	0	0	0	0	0	0	0	0	0	0	0	0	0	0	0	0	0	0	0	0	0	0	0	0	0	0	0	0	0	0	0
k__Bacteria;p__Firmicutes;c__Negativicutes;o__Veillonellales;f__Veillonellaceae;g__Megasphaera;s__Megasphaera_genomosp._type_2	0	0	0	0	0	0	0	0	0	0	0	0	0	0	0	0	0	0	0	0	18.31	0	0	0	0	0	7	0	0	0	0	0	0	0	0	0	0	0	0	0	0	0	0	0	0	0	0	0
k__Bacteria;p__Firmicutes;c__Negativicutes;o__Veillonellales;f__Veillonellaceae;g__Megasphaera;s__Megasphaera_micronuciformis	0	0	0	0	0	0	0	0	0	0	0	0	0	0	0	0	0	0	0	0	8	0	0	0	0	0	0	0	0	0	0	0	0	0	0	0	0	0	0	0	0	0	0	0	0	0	0	0
k__Bacteria;p__Firmicutes;c__Negativicutes;o__Veillonellales;f__Veillonellaceae;g__Megasphaera;s__Megasphaera_sp._ASD88	0	0	0	0	0	0	0	0	0	0	0	0	0	0	0	0	0	0	0	0	4	0	0	0	0	0	0	0	0	0	0	0	0	0	0	0	0	0	0	0	0	0	0	0	0	0	0	0
k__Bacteria;p__Firmicutes;c__Negativicutes;o__Veillonellales;f__Veillonellaceae;g__Megasphaera;s__Megasphaera_sp._BV3C16-1	0	0	0	0	0	0	0	0	0	0	0	0	0	0	0	0	0	0	0	0	7	0	0	0	0	0	0	0	0	0	0	0	0	0	0	0	0	0	0	0	0	0	0	0	0	0	0	0
k__Bacteria;p__Firmicutes;c__Negativicutes;o__Veillonellales;f__Veillonellaceae;g__Megasphaera;s__Megasphaera_sp._UPII_135-E	0	0	0	0	0	0	0	0	0	0	0	0	0	0	0	0	0	0	0	0	11.231	0	0	0	0	0	1	0	0	0	0	0	0	0	0	0	0	0	0	0	0	0	0	0	0	0	0	0
k__Bacteria;p__Firmicutes;c__Negativicutes;o__Veillonellales;f__Veillonellaceae;g__Megasphaera;s__Megasphaera_sp._UPII_199-6	0	0	0	0	0	0	0	0	0	0	0	0	0	0	0	0	0	0	0	0	4	0	0	0	0	0	0	0	0	0	0	0	0	0	0	0	0	0	0	0	0	0	0	0	0	0	0	0
k__Bacteria;p__Firmicutes;c__Negativicutes;o__Veillonellales;f__Veillonellaceae;g__Veillonella;s__Veillonella_atypica	0	0	0	0	0	0	0	0	0	0	0	0	0	0	0	0	0	0	0	0	5	0	0	0	0	0	0	0	0	0	0	0	0	0	0	0	0	0	0	0	0	0	0	0	0	0	0	0
k__Bacteria;p__Firmicutes;c__Negativicutes;o__Veillonellales;f__Veillonellaceae;g__Veillonella;s__Veillonella_caviae	0	0	0	0	0	0	0	0	0	0	0	0	0	0	0	0	0	0	0	0	0	0	0	0	0	0	3	0	0	0	0	0	0	0	0	0	0	0	0	0	0	0	0	0	0	0	0	0
k__Bacteria;p__Firmicutes;c__Negativicutes;o__Veillonellales;f__Veillonellaceae;g__Veillonella;s__Veillonella_denticariosi	0	0	0	0	0	0	0	0	0	0	0	0	0	0	0	0	0	0	0	0	23	0	0	0	0	0	3	0	0	0	0	0	0	0	0	0	0	0	0	0	0	0	0	0	0	0	0	0
k__Bacteria;p__Firmicutes;c__Negativicutes;o__Veillonellales;f__Veillonellaceae;g__Veillonella;s__Veillonella_dispar	0	0	0	0	0	0	0	0	0	0	0	0	0	0	0	0	0	0	0	0	4	0	0	0	0	0	4	0	0	0	0	0	0	0	0	0	0	0	0	0	0	0	0	0	0	0	0	0
k__Bacteria;p__Firmicutes;c__Negativicutes;o__Veillonellales;f__Veillonellaceae;g__Veillonella;s__Veillonella_magna	0	0	0	0	0	0	0	0	0	0	0	0	0	0	0	0	0	0	0	0	6	0	0	0	0	0	0	0	0	0	0	0	0	0	0	0	0	0	0	0	0	0	0	0	0	0	0	0
k__Bacteria;p__Firmicutes;c__Negativicutes;o__Veillonellales;f__Veillonellaceae;g__Veillonella;s__Veillonella_montpellierensis	0	16	1	0	0	0	0	0	0	0	0	0	1	0	2	1	2	5	0	2	4826.05	4	0	0	3	0	907.782	0	2	0	0	0	0	0	0	0	0	0	0	0	0	0	0	0	0	0	0	0
k__Bacteria;p__Firmicutes;c__Negativicutes;o__Veillonellales;f__Veillonellaceae;g__Veillonella;s__Veillonella_parvula	0	0	0	0	0	0	0	0	0	0	0	0	0	0	0	0	0	0	0	0	26	0	0	0	0	0	25	0	0	0	0	0	0	0	0	0	0	0	0	0	0	0	0	0	0	0	0	0
k__Bacteria;p__Firmicutes;c__Negativicutes;o__Veillonellales;f__Veillonellaceae;g__Veillonella;s__Veillonella_sp.	0	0	0	0	0	0	0	0	0	0	0	0	0	0	0	0	0	0	0	0	10	0	0	0	0	0	0	0	0	0	0	0	0	0	0	0	0	0	0	0	0	0	0	0	0	0	0	0
k__Bacteria;p__Firmicutes;c__Negativicutes;o__Veillonellales;f__Veillonellaceae;g__Veillonella;s__Veillonella_sp._T34266-5	0	0	0	0	0	0	0	0	0	0	0	0	0	0	0	0	0	0	0	0	8	0	0	0	0	0	1	0	0	0	0	0	0	0	0	0	0	0	0	0	0	0	0	0	0	0	0	0
k__Bacteria;p__Firmicutes;c__Negativicutes;o__Veillonellales;f__Veillonellaceae;g__Veillonella;s__Veillonella_sp._VA137	0	0	0	0	0	0	0	0	0	0	0	0	0	0	0	0	0	0	0	0	0	0	0	0	0	0	12	0	0	0	0	0	0	0	0	0	0	0	0	0	0	0	0	0	0	0	0	0
k__Bacteria;p__Firmicutes;c__Negativicutes;o__Veillonellales;f__Veillonellaceae;g__Veillonella;s__Veillonella_sp._VA139	0	0	0	0	0	0	0	0	0	0	0	0	0	0	0	0	0	0	0	0	0	0	0	0	0	0	10	0	0	0	0	0	0	0	0	0	0	0	0	0	0	0	0	0	0	0	0	0
k__Bacteria;p__Firmicutes;c__Negativicutes;o__Veillonellales;f__Veillonellaceae;g__Veillonella;s__Veillonella_sp._VA141	0	0	0	0	0	0	0	0	0	0	0	0	0	0	0	0	0	0	0	0	7	0	0	0	0	0	0	0	0	0	0	0	0	0	0	0	0	0	0	0	0	0	0	0	0	0	0	0
k__Bacteria;p__Firmicutes;c__Negativicutes;o__Veillonellales;f__Veillonellaceae;g__Veillonella;s__Veillonella_tobetsuensis	0	0	0	0	0	0	0	0	0	0	0	0	0	0	0	0	0	0	0	0	11	0	0	0	0	0	0	0	0	0	0	0	0	0	0	0	0	0	0	0	0	0	0	0	0	0	0	0
k__Bacteria;p__Firmicutes;c__Negativicutes;o__Veillonellales;f__Veillonellaceae;g__unclassified;s__Veillonellaceae_bacterium	0	0	0	0	0	0	0	0	0	0	0	0	0	0	0	0	0	0	0	0	3	0	0	0	1	0	0	0	0	0	0	0	0	0	0	0	0	0	0	0	0	0	0	0	0	0	0	0
k__Bacteria;p__Firmicutes;c__Negativicutes;o__Veillonellales;f__Veillonellaceae;g__unclassified;s__Veillonellaceae_bacterium_DNF00626	0	0	0	0	0	0	0	0	0	0	0	0	0	0	0	0	0	0	0	0	55.822	0	0	0	0	0	2	0	0	0	0	0	0	0	0	0	0	0	0	0	0	0	0	0	0	0	0	0
k__Bacteria;p__Firmicutes;c__Negativicutes;o__Veillonellales;f__Veillonellaceae;g__unclassified;s__Veillonellaceae_bacterium_DNF00751	0	0	0	0	0	0	0	0	0	0	0	0	0	0	0	0	0	0	0	0	11	0	0	0	0	0	0	0	0	0	0	0	0	0	0	0	0	0	0	0	0	0	0	0	0	0	0	0
k__Bacteria;p__Firmicutes;c__Negativicutes;o__Veillonellales;f__Veillonellaceae;g__unclassified;s__Veillonellaceae_bacterium_KA00182	0	0	0	0	0	0	0	0	0	0	0	0	0	0	0	0	0	0	0	0	7.587	0	0	0	0	0	0	0	0	0	0	0	0	0	0	0	0	0	0	0	0	0	0	0	0	0	0	0
k__Bacteria;p__Firmicutes;c__Negativicutes;o__Veillonellales;f__Veillonellaceae;g__unclassified;s__Veillonellaceae_bacterium_M1-70	0	0	0	0	0	0	0	0	0	0	0	0	0	0	0	0	0	0	0	0	3	0	0	0	0	0	0	0	0	0	0	0	0	0	0	0	0	0	0	0	0	0	0	0	0	0	0	0
k__Bacteria;p__Firmicutes;c__Negativicutes;o__Veillonellales;f__Veillonellaceae;g__unclassified;s__Veillonellaceae_bacterium_M2-4	0	0	0	0	0	0	0	0	0	0	0	0	0	0	0	0	0	0	0	0	5	0	0	0	0	0	5	0	0	0	0	0	0	0	0	0	0	0	0	0	0	0	0	0	0	0	0	0
k__Bacteria;p__Firmicutes;c__Negativicutes;o__Veillonellales;f__Veillonellaceae;g__unclassified;s__Veillonellaceae_bacterium_M2-8	0	0	0	0	0	0	0	0	0	0	0	0	0	0	0	0	0	0	0	0	37.357	0	0	0	0	0	1	0	0	0	0	0	0	0	0	0	0	0	0	0	0	0	0	0	0	0	0	0
k__Bacteria;p__Firmicutes;c__Negativicutes;o__unclassified;f__unclassified;g__unclassified;s__Negativicutes_bacterium	0	0	0	0	0	0	0	0	0	0	0	0	0	0	0	0	0	0	0	0	10	0	0	0	0	0	0	0	0	0	0	0	0	0	0	0	0	0	0	0	0	0	0	0	0	0	0	0
k__Bacteria;p__Firmicutes;c__Tissierellia;o__Tissierellales;f__Peptoniphilaceae;g__Anaerococcus;s__Anaerococcus_hydrogenalis	0	0	0	0	0	0	0	0	0	0	0	0	0	0	0	0	0	0	0	0	8	0	0	0	0	0	0	0	0	0	0	0	0	0	0	0	0	0	0	0	0	0	0	0	0	0	0	0
k__Bacteria;p__Firmicutes;c__Tissierellia;o__Tissierellales;f__Peptoniphilaceae;g__Anaerococcus;s__Anaerococcus_mediterraneensis	0	0	0	0	0	0	0	0	0	0	0	0	0	0	0	0	0	0	0	0	0	0	0	0	0	0	0	0	0	0	71	0	0	0	0	0	0	0	0	0	0	0	0	0	0	0	0	0
k__Bacteria;p__Firmicutes;c__Tissierellia;o__Tissierellales;f__Peptoniphilaceae;g__Anaerococcus;s__Anaerococcus_nagyae	0	0	0	0	0	0	0	0	0	0	0	0	0	0	0	0	0	0	0	0	0	0	0	0	0	0	0	0	0	1	15	0	0	0	0	0	0	0	0	0	61	0	64	0	0	0	0	0
k__Bacteria;p__Firmicutes;c__Tissierellia;o__Tissierellales;f__Peptoniphilaceae;g__Anaerococcus;s__Anaerococcus_octavius	0	0	0	0	0	0	2	2	4	0	0	0	0	0	0	0	0	0	0	11.651	0	0	9	0	1	0	148.138	1	0	0	0	1	0	8	0	0	8	230.638	0	0	0	1	0	0	0	0	32.398	11
k__Bacteria;p__Firmicutes;c__Tissierellia;o__Tissierellales;f__Peptoniphilaceae;g__Anaerococcus;s__Anaerococcus_prevotii	0	0	0	0	0	0	0	0	0	0	0	0	0	0	0	0	0	0	0	0	0	0	0	0	0	0	0	0	0	0	0	0	0	0	0	0	0	0	0	0	0	0	471.576	0	0	0	0	1
k__Bacteria;p__Firmicutes;c__Tissierellia;o__Tissierellales;f__Peptoniphilaceae;g__Anaerococcus;s__Anaerococcus_senegalensis	0	0	3	0	0	0	0	0	0	0	0	0	0	0	0	0	0	0	0	0	0	0	0	0	0	0	0	0	0	0	0	0	0	0	0	0	0	0	0	0	0	0	0	0	0	0	0	0
k__Bacteria;p__Firmicutes;c__Tissierellia;o__Tissierellales;f__Peptoniphilaceae;g__Anaerococcus;s__Anaerococcus_sp._HMSC068A02	0	0	3	0	0	0	0	0	0	0	0	0	0	0	0	0	0	0	0	0	0	0	0	0	0	0	0	0	0	0	0	0	0	0	0	0	0	0	0	0	0	0	0	0	0	0	0	0
k__Bacteria;p__Firmicutes;c__Tissierellia;o__Tissierellales;f__Peptoniphilaceae;g__Anaerococcus;s__Anaerococcus_sp._Marseille-P3625	0	0	0	0	0	0	0	0	0	0	0	0	0	0	0	0	0	0	0	0	0	0	0	0	0	0	0	0	0	0	1.447	0	0	0	0	0	0	0	0	0	19.548	0	29.77	0	0	0	0	0
k__Bacteria;p__Firmicutes;c__Tissierellia;o__Tissierellales;f__Peptoniphilaceae;g__Anaerococcus;s__Anaerococcus_sp._WCA-380-WT-2B	0	0	0	0	0	0	0	0	0	0	0	0	0	0	0	0	0	0	0	0	0	0	4	0	0	0	0	2	0	4.59	36	0	0	0	0	0	0	0	0	0	148	0	198	0	0	0	8	0
k__Bacteria;p__Firmicutes;c__Tissierellia;o__Tissierellales;f__Peptoniphilaceae;g__Anaerococcus;s__Anaerococcus_tetradius	0	0	0	0	0	1	0	0	2	0	0	0	168.196	1	0	0	0	1	0	0	0	0	43.793	0	0	0	200.691	5.479	80.925	0	2.9	0	16.897	11.274	0	0	2.723	278.421	4178.76	2	50.472	0	0	0	0	0	0	24.893
k__Bacteria;p__Firmicutes;c__Tissierellia;o__Tissierellales;f__Peptoniphilaceae;g__Finegoldia;s__Finegoldia_magna	3	423	0	0	0	0	1	3	7	6	0	0	130	8	0	1	0	0	0	19	11	6	20	0	1	2	341	14	137	4	25	0	0	33	0	0	6	366	224	0	69	14	97	0	0	0	140	28
k__Bacteria;p__Firmicutes;c__Tissierellia;o__Tissierellales;f__Peptoniphilaceae;g__Finegoldia;s__Finegoldia_sp._BIOML-A4	0	0	0	0	0	0	0	0	0	0	0	0	0	29	0	0	0	0	0	0	0	0	140.593	0	0	0	0	0	365.716	0	33.053	0	0	0	0	0	0	0	0	0	193.533	0	0	0	0	0	0	0
k__Bacteria;p__Firmicutes;c__Tissierellia;o__Tissierellales;f__Peptoniphilaceae;g__Helcococcus;s__Helcococcus_kunzii	0	0	0	0	0	0	0	0	3	1	0	0	227	20	0	0	0	0	0	0	0	1	0	0	0	0	0	0	119	3	24	0	7	0	0	0	0	0	169.964	0	62	10	91	0	0	0	133	0
k__Bacteria;p__Firmicutes;c__Tissierellia;o__Tissierellales;f__Peptoniphilaceae;g__Helcococcus;s__Helcococcus_ovis	0	0	0	0	0	0	0	0	0	0	0	0	0	0	0	0	0	0	0	0	0	0	0	0	0	0	0	0	0	0	0	0	0	0	295.389	1	0	0	0	0	0	0	0	0	0	0	0	0
k__Bacteria;p__Firmicutes;c__Tissierellia;o__Tissierellales;f__Peptoniphilaceae;g__Peptoniphilus;s__Peptoniphilus_duerdenii	0	0	0	0	0	0	0	0	0	0	0	0	0	0	0	0	0	0	0	0	0	0	25	0	0	0	0	0	0	0	0	0	0	0	0	0	0	0	0	0	0	0	0	0	0	0	0	0
k__Bacteria;p__Firmicutes;c__Tissierellia;o__Tissierellales;f__Peptoniphilaceae;g__Peptoniphilus;s__Peptoniphilus_grossensis	0	0	4	0	0	0	0	0	0	0	0	0	0	0	0	0	0	0	0	0	0	0	0	0	0	0	0	0	0	0	0	0	0	0	0	0	0	0	0	0	0	0	0	0	0	0	0	0
k__Bacteria;p__Firmicutes;c__Tissierellia;o__Tissierellales;f__Peptoniphilaceae;g__Peptoniphilus;s__Peptoniphilus_harei	0	0	0	0	0.5	0	10	2	12	3	0	0	335.894	49.998	0	0	0	0	0	24.877	8.62	4.5	66.431	0.5	2.012	0.5	2476.96	26.116	136.332	19.287	16.418	0	29.178	69.193	245.407	1	70.954	801.727	304.813	1	144.212	2.814	36.874	1.333	0	0	340.723	87.583
k__Bacteria;p__Firmicutes;c__Tissierellia;o__Tissierellales;f__Peptoniphilaceae;g__Peptoniphilus;s__Peptoniphilus_lacrimalis	27.99	0	304.354	0	69	0	0	0	0	0	0	60.239	726.952	0	187.103	32	1	24.408	2	2	2992.45	4.5	195.389	46881.1	137.723	0	98.976	0	106.484	4	0	9	1	14	0	0	0	1	0	0	0	0	0	0	0	0	0	0
k__Bacteria;p__Firmicutes;c__Tissierellia;o__Tissierellales;f__Peptoniphilaceae;g__Peptoniphilus;s__Peptoniphilus_lacydonensis	0	0	0	0	0	0	0	0	0	0	0	0	0	0	0	0	0	0	0	9	0	0	0	0	0	0	1	2	0	1	20.222	0	0	0	0	0	2.336	0	0	1	79.419	0	125.858	0	0	0	0	0
k__Bacteria;p__Firmicutes;c__Tissierellia;o__Tissierellales;f__Peptoniphilaceae;g__Peptoniphilus;s__Peptoniphilus_rhinitidis	0	0	0	0	0	0	0	0	0	0	0	0	0	0	0	0	0	1	0	0	26	0	0	0	0	0	3	0	0	0	0	0	0	0	0	0	0	0	0	0	0	0	0	0	0	0	0	0
k__Bacteria;p__Firmicutes;c__Tissierellia;o__Tissierellales;f__Peptoniphilaceae;g__Peptoniphilus;s__Peptoniphilus_sp._BV3AC2	0	333.112	0	0	0	0	0	0	4	2.904	1	0	209.233	6.331	0	2	0	0	0	17	3	0	42.024	0	10	0	300.288	11.953	0	1	10	0	1.184	16.589	185.516	1	5	293.567	177.011	0	56.586	0	0	0	0	1	125.385	24.422
k__Bacteria;p__Firmicutes;c__Tissierellia;o__Tissierellales;f__Peptoniphilaceae;g__Peptoniphilus;s__Peptoniphilus_sp._BV3C26	0	0	0	0	0	0	0	0	0	0	0	0	0	0	0	0	0	2	1	0	14	0	0	0	0	0	0	0	0	6	9	0	0	0	0	0	0	0	0	0	40	0	81	0	0	0	0	0
k__Bacteria;p__Firmicutes;c__Tissierellia;o__Tissierellales;f__Peptoniphilaceae;g__Peptoniphilus;s__Peptoniphilus_sp._DNF00840	0	0	0	0	0	0	0	0	0	0	0	0	4	0	0	0	0	0	0	0	0	0	0	0	0	0	0	0	0	0	0	0	0	0	0	0	0	0	0	0	0	0	0	0	0	0	0	0
k__Bacteria;p__Firmicutes;c__Tissierellia;o__Tissierellales;f__Peptoniphilaceae;g__Peptoniphilus;s__Peptoniphilus_sp._oral_taxon_375	0	0	0	0	0	0	0	0	0	0	0	0	0	0	0	0	0	0	0	0	0	0	17	0	0	0	0	0	0	0	0	0	0	0	0	0	0	0	0	0	0	0	0	0	0	0	0	0
k__Bacteria;p__Firmicutes;c__Tissierellia;o__Tissierellales;f__Peptoniphilaceae;g__Urinicoccus;s__Urinicoccus_massiliensis	0	0	0	0	0	0	0	0	0	0	0	0	2	0	0	0	0	1	0	1	12	0	16.136	206.223	2	0	0	0	0	0	0	0	0	0	0	0	0	0	0	0	0	0	0	0	0	0	0	0
k__Bacteria;p__Firmicutes;c__Tissierellia;o__Tissierellales;f__Tissierellaceae;g__Soehngenia;s__Soehngenia_saccharolytica	470.203	4	477.282	16	4	7	4	4	12	8	11	4	5	1	4	12	4	6	6	11	5	5	3	1	1119.22	5	1241.53	684.773	713.309	894.856	898.25	3.002	13	15	3	7	7	8	9	7	2	2	14	4	0	1	5	10
k__Bacteria;p__Firmicutes;c__Tissierellia;o__Tissierellales;f__Tissierellaceae;g__Soehngenia;s__Soehngenia_sp._1933P	0	0	0	0	0	0	0	0	0	1	0	0	0	0	0	0	0	0	0	0	0	0	0	0	0	0	0	0	824.24	2	0	0	0	0	0	0	0	0	0	0	0	0	0	0	0	0	0	0
k__Bacteria;p__Firmicutes;c__Tissierellia;o__Tissierellales;f__Tissierellaceae;g__Tissierella;s__Tissierella_creatinini	107.197	0	112.941	5.337	4	7	3.796	13	6	5	9	5	2	6	8	1	3	6	3	11	4	4	6	9	253.88	7	270.111	156.22	207.105	195.901	220.496	2	0	3	8	3	17	5	0	7	3	3	3	6	4	4	5	8
k__Bacteria;p__Firmicutes;c__Tissierellia;o__unclassified;f__unclassified;g__Ezakiella;s__Ezakiella_peruensis	0	0	0	0	0	0	0	0	0	0	0	0	0	0	0	0	0	0	0	0	0	0	0	0	0	0	0	0	0	0	0	0	0	0	0	0	0	0	86.348	1	0	0	0	0	0	0	0	0
k__Bacteria;p__Firmicutes;c__Tissierellia;o__unclassified;f__unclassified;g__unclassified;s__Tissierellia_bacterium_KA00581	14	2394.55	0	0	1	6	6	12	38	7	0	39	1277.98	51	2	3	0	0	0	148	20	0	285	918.954	77	0	2005.72	74	2	13	96	2	52	134	1170	1	61	1979	1347.18	1	372	44	0	3	0	0	768.55	232.263
k__Bacteria;p__Firmicutes;c__Tissierellia;o__unclassified;f__unclassified;g__unclassified;s__Tissierellia_bacterium_S5-A11	0	0	0	0	0	0	0	0	0	0	0	0	0	0	0	0	0	0	0	0	4	0	0	0	0	0	0	0	0	0	0	0	0	0	0	0	0	0	0	0	0	0	0	0	0	0	0	0
k__Bacteria;p__Firmicutes;c__unclassified;o__unclassified;f__unclassified;g__unclassified;s__Firmicutes_bacterium	6	6	10	17.114	5	8	7	6	12	3	8.679	3	1	15	7	6	5.023	4	6.009	7	9.055	12.029	3	7	9.783	7	9.025	6	9.478	4	2	4	12	4	4	9	3	3	10	4.061	13.649	5	7	10.358	9	5	6	7.276
k__Bacteria;p__Firmicutes;c__unclassified;o__unclassified;f__unclassified;g__unclassified;s__Firmicutes_bacterium_AF25-13AC	0	0	0	0	0	0	0	0	0	0	0	0	0	13	0	0	0	0	0	0	0	0	0	0	0	0	0	0	0	0	0	0	0	0	0	0	0	0	0	0	0	0	0	0	0	0	0	0
k__Bacteria;p__Fusobacteria;c__Fusobacteriia;o__Fusobacteriales;f__Fusobacteriaceae;g__Fusobacterium;s__Fusobacterium_necrophorum	36.566	19	30.802	25	26.789	18.384	20	19.71	24.662	27.408	13	39	13.413	26	14	42.962	20.439	15	29	26.259	14	38	22	26.735	20.642	19	19	18.985	20.09	24.367	27.378	17	25.275	24	16.694	15	16.159	17.004	13	8	20.794	9	19.29	29	26	16	25	17.857
k__Bacteria;p__Fusobacteria;c__Fusobacteriia;o__Fusobacteriales;f__Fusobacteriaceae;g__Fusobacterium;s__Fusobacterium_pseudoperiodonticum	4	0	1.17	0	0	0	0	0	0	0	0	0	0	0	0	0	0	0	0	0	0	0	0	0	7.41	0	7.734	5.83	8	9	11	0	0	0	0	0	0	0	0	0	0	0	0	0	0	0	0	0
k__Bacteria;p__Fusobacteria;c__Fusobacteriia;o__Fusobacteriales;f__Leptotrichiaceae;g__Streptobacillus;s__Streptobacillus_moniliformis	0	0	5	0	0	0	0	0	0	0	0	0	0	0	0	0	0	0	0	0	8	0	0	0	0	0	1	0	0	0	0	0	0	0	0	0	0	0	0	0	0	0	0	0	0	0	0	0
k__Bacteria;p__Gemmatimonadetes;c__Gemmatimonadetes;o__Gemmatimonadales;f__Gemmatimonadaceae;g__Gemmatimonas;s__Gemmatimonas_sp._SM23_52	0	0	1	0	0	0	1	2	0	0	1	0	1	1	0	0	4	1	1	0	0	0	0	0	0	0	0	0	0	0	0	0	1	0	0	0	0	0	0	1	0	0	2	0	0	0	0	0
k__Bacteria;p__Gemmatimonadetes;c__unclassified;o__unclassified;f__unclassified;g__unclassified;s__Gemmatimonadetes_bacterium	6.407	4	10.191	0	1	3	6	2	1	0	7	1	3	2	1	3	4	2	1	3	1	1	0	5	22.309	2	40.999	18.567	12.447	17	18.217	0	8	2	4	1	4	1	6	0	8	1	1	1	3	0	0	4
k__Bacteria;p__Ignavibacteriae;c__Ignavibacteria;o__unclassified;f__unclassified;g__unclassified;s__Ignavibacteria_bacterium	1	1	0	0	0	0	0	0	0	0	0	0	8	0	1	0	0	0	2	1	1	1	3	0	0	0	0	0	0	0	2	1	0	0	0	0	0	0	0	0	0	0	0	0	0	0	0	0
k__Bacteria;p__Kiritimatiellaeota;c__Kiritimatiellae;o__unclassified;f__unclassified;g__unclassified;s__Kiritimatiellae_bacterium	0	0	3	0	0	0	0	0	0	0	0	0	0	0	0	0	0	0	0	0	0	0	0	0	4	0	0	0	6	0	1	0	0	0	0	0	0	0	0	0	0	0	0	0	0	0	0	0
k__Bacteria;p__Kiritimatiellaeota;c__unclassified;o__unclassified;f__unclassified;g__unclassified;s__Kiritimatiellaeota_bacterium	0	0	0	0	0	0	0	0	0	0	0	0	0	0	0	0	0	0	0	0	0	0	0	0	4.243	0	2.561	1	1	1	0	0	0	0	0	0	0	0	0	0	0	0	0	0	0	0	0	0
k__Bacteria;p__Lentisphaerae;c__Lentisphaeria;o__unclassified;f__unclassified;g__unclassified;s__Lentisphaeria_bacterium	1.31	0	3.258	0	0	0	0	0	0	0	0	0	0	0	0	0	0	0	0	0	0	0	0	0	3.404	0	10.689	2.141	5.573	7.458	4.499	0	0	0	0	0	0	0	0	0	0	0	0	0	0	0	0	0
k__Bacteria;p__Lentisphaerae;c__unclassified;o__unclassified;f__unclassified;g__unclassified;s__Lentisphaerae_bacterium	0	0	0	0	0	0	0	0	0	0	0	0	0	0	0	0	0	0	0	0	0	0	0	0	5	0	1.44	2	3	3.627	3.633	0	0	0	0	0	0	0	0	0	0	0	0	0	0	0	0	0
k__Bacteria;p__Lentisphaerae;c__unclassified;o__unclassified;f__unclassified;g__unclassified;s__Lentisphaerae_bacterium_ADurb.BinA184	0	0	1	0	0	0	0	0	0	2	1	1	2	4	0	0	0	0	0	3	0	0	0	0	0	0	0	0	1	0	0	0	0	0	1	0	0	0	0	0	0	0	0	0	0	0	0	0
k__Bacteria;p__Lentisphaerae;c__unclassified;o__unclassified;f__unclassified;g__unclassified;s__Lentisphaerae_bacterium_RIFOXYA12_64_32	0	0	0	0	1	0	0	0	0	0	0	0	0	0	1	0	0	0	0	0	0	0	0	0	1	1	0	0	0	4	0	0	0	0	3	0	0	0	0	0	0	0	0	0	0	0	0	0
k__Bacteria;p__Nitrospinae;c__Nitrospinia;o__Nitrospinales;f__Nitrospinaceae;g__Nitrospina;s__Nitrospina_sp.	0	0	1	0	0	1	0	2	5	2	0	0	1	0	0	0	0	4	3	0	0	0	0	0	0	0	0	1	1	2	3	0	0	0	0	0	1	0	0	0	0	0	0	1	1	0	0	1
k__Bacteria;p__Nitrospinae;c__unclassified;o__unclassified;f__unclassified;g__unclassified;s__Nitrospinae_bacterium	0	0	0	0	0	0	0	0	0	0	0	0	0	0	0	0	0	0	0	0	0	0	0	0	2	0	3	1	3	0	1	0	0	0	0	0	0	0	0	0	0	0	0	0	0	0	0	0
k__Bacteria;p__Nitrospirae;c__Nitrospira;o__Nitrospirales;f__Nitrospiraceae;g__Nitrospira;s__Nitrospira_sp._SB0666_bin_27	0	0	7	0	0	0	0	0	0	0	0	0	0	1	0	0	1	0	0	0	0	3	2	0	0	1	0	0	0	0	2	1	0	0	0	0	0	0	0	0	0	0	2	0	0	0	0	0
k__Bacteria;p__Nitrospirae;c__Nitrospira;o__Nitrospirales;f__unclassified;g__unclassified;s__Nitrospirales_bacterium_LBB_01	17.015	5.689	22.962	11	8.714	13	9.249	3.139	8.374	8	5	5	9	1	4.16	5	3	5	14.605	8	15.511	7.253	6	15	8	5.56	14	11	5	17.148	11.942	7.666	3.131	6	15	8	9.763	6	15.389	14	1	4	9.664	6	3	4	9	10
k__Bacteria;p__Nitrospirae;c__unclassified;o__unclassified;f__unclassified;g__unclassified;s__Nitrospirae_bacterium	2	0	1	0	0	0	0	0	0	0	0	0	0	0	0	0	0	0	0	0	0	0	0	3	3	0	11	3	3	7	0	0	0	0	0	0	0	0	0	0	0	0	0	0	0	0	0	0
k__Bacteria;p__Planctomycetes;c__Candidatus_Brocadiae;o__unclassified;f__unclassified;g__unclassified;s__Candidatus_Brocadiae_bacterium	0	0	1	0	1	0	0	4	1	0	0	0	0	1	0	1	2	1	2	0	0	0	1	1	3	0	0	1	0	0	0	0	4	0	0	1	0	0	0	0	0	0	0	0	0	0	0	1
k__Bacteria;p__Planctomycetes;c__Phycisphaerae;o__Phycisphaerales;f__unclassified;g__unclassified;s__Phycisphaerales_bacterium	1	0	0	0	0	0	0	0	0	0	0	0	0	0	0	0	0	0	0	0	0	0	0	0	2	0	1	3	2	4	1	0	0	0	0	0	0	0	0	0	0	0	0	0	0	0	0	0
k__Bacteria;p__Planctomycetes;c__Phycisphaerae;o__unclassified;f__unclassified;g__unclassified;s__Phycisphaerae_bacterium	3	0	0	0	0	0	0	0	0	0	0	0	0	0	0	0	0	0	0	0	0	0	0	0	10	0	8	3	4	4.554	3	0	0	0	0	0	0	0	0	0	0	0	0	0	0	0	0	0
k__Bacteria;p__Planctomycetes;c__Planctomycetia;o__Gemmatales;f__Gemmataceae;g__Gemmata;s__Gemmata_obscuriglobus	8	0	3	0	0	0	0	0	0	0	0	0	0	0	0	0	0	0	0	0	0	0	0	0	16	0	16	16	10	12	9	0	0	0	0	0	0	0	0	0	0	0	0	0	0	0	0	0
k__Bacteria;p__Planctomycetes;c__Planctomycetia;o__Gemmatales;f__Gemmataceae;g__Tuwongella;s__Tuwongella_immobilis	0	0	2	0	0	0	0	0	0	0	0	0	0	0	0	0	0	0	0	0	0	0	1	0	4	0	3	4	5	5	1	0	0	0	0	0	0	0	0	0	0	0	0	0	0	0	0	0
k__Bacteria;p__Planctomycetes;c__Planctomycetia;o__Gemmatales;f__Gemmataceae;g__unclassified;s__Gemmataceae_bacterium	4	0	2	0	3	0	0	0	0	0	3	0	0	1	0	0	2	0	2	0	1	0	1	0	4	0	5	5	2	2	6	1	1	0	0	0	1	0	0	0	0	1	0	0	0	1	0	0
k__Bacteria;p__Planctomycetes;c__Planctomycetia;o__Isosphaerales;f__Isosphaeraceae;g__Paludisphaera;s__Paludisphaera_borealis	2	2	5	0	2	3	0	5.646	1	0	0	7	2	6	2.691	1.476	0	3	0	1	1	0	0	3	0	0	0	2	0	2	0	0	0	1	5	0	0	1	0	3	0	1	1	1	0	1	1	0
k__Bacteria;p__Planctomycetes;c__Planctomycetia;o__Isosphaerales;f__Isosphaeraceae;g__Tautonia;s__Tautonia_sociabilis	1	0	0	0	0	0	0	0	0	0	0	0	0	0	0	0	0	0	0	0	0	0	0	0	0	0	0	1	0	3	1	0	0	0	0	0	0	0	0	0	0	0	0	0	0	0	0	0
k__Bacteria;p__Planctomycetes;c__Planctomycetia;o__Pirellulales;f__Pirellulaceae;g__Blastopirellula;s__Blastopirellula_cremea	637.372	464.443	642.274	795.239	674.967	683.955	649.989	510.498	714.073	666.407	581.068	714.947	688.23	781.372	519.556	721.987	526.504	648.901	703.63	833.209	627.99	794.71	551.328	764.978	664.307	659.512	770.106	717.279	616.869	801.554	623.594	748.875	901.269	531.95	589.395	580.927	570.406	477.828	705.638	463.626	584.002	432.768	753.974	763.955	552.55	570.964	632.997	610.447
k__Bacteria;p__Planctomycetes;c__Planctomycetia;o__Pirellulales;f__Pirellulaceae;g__Blastopirellula;s__Blastopirellula_retiformator	1	0	5	0	0	0	0	0	0	0	0	0	0	0	0	0	0	0	0	0	0	0	0	0	6	0	7.774	4	1	1	2	0	0	0	0	0	0	0	0	0	0	0	0	0	0	0	0	0
k__Bacteria;p__Planctomycetes;c__Planctomycetia;o__Pirellulales;f__Pirellulaceae;g__Rhodopirellula;s__Rhodopirellula_solitaria	0	1	0	0	0	3	0	0	0	0	0	0	0	0	0	0	0	0	0	0	1	0	0	0	0	0	0	0	0	0	0	1	0	0	0	0	0	0	0	0	0	0	0	0	0	1	1	0
k__Bacteria;p__Planctomycetes;c__Planctomycetia;o__Pirellulales;f__Pirellulaceae;g__Rhodopirellula;s__Rhodopirellula_sp.	0	0	0	0	0	0	0	0	0	0	0	0	0	0	0	0	0	0	0	0	0	0	0	0	1.145	0	5	1	0	0	0	0	0	0	0	0	0	0	0	0	0	0	0	0	0	0	0	0
k__Bacteria;p__Planctomycetes;c__Planctomycetia;o__Pirellulales;f__Pirellulaceae;g__Rhodopirellula;s__Rhodopirellula_sp._SWK7	3	0	0	0	0	0	0	0	0	0	0	0	0	0	0	0	0	0	0	0	0	0	0	0	0	0	0	3.642	2	3	0	0	0	0	0	0	0	0	0	0	0	0	0	0	0	0	0	0
k__Bacteria;p__Planctomycetes;c__Planctomycetia;o__Planctomycetales;f__Planctomycetaceae;g__Planctopirus;s__Planctopirus_hydrillae	5	3	1	2	4	5	5	2	2	4	4	1	2	12	10	4	5	5	5	8	0	2	2	8	5	10	6	3	3	10.895	3	13	6	5	4	7	7	2	4	5	3	1	3	2	4	5	3	9
k__Bacteria;p__Planctomycetes;c__Planctomycetia;o__Planctomycetales;f__Planctomycetaceae;g__unclassified;s__Planctomycetaceae_bacterium	9	10	14	11	12	20	16	8	7	12	9	11	12.5	14	11	7	17	7	13	20	12.5	15	7	21	14.5	8	19	14	20	17	7	10	21	10	6.5	10	10	2	9.5	3	6	12	16	11	11	8.5	8	11.5
k__Bacteria;p__Planctomycetes;c__unclassified;o__unclassified;f__unclassified;g__unclassified;s__Planctomycetes_bacterium	44.438	2	57.895	1	0	2	0	1	2	4	1	2	0	0	0	0	3	0	2	4	4	5	1	2	107.709	2	151.46	85.45	62.576	79.599	112.693	3	1	0	2	0	0	0	7	0	0	0	6	0	0	0	0	0
k__Bacteria;p__Planctomycetes;c__unclassified;o__unclassified;f__unclassified;g__unclassified;s__Planctomycetes_bacterium_Pan216	7.229	0	6.636	0	0	0	0	0	0	0	0	0	0	0	0	0	0	0	1	0	0	0	0	0	26.746	0	28.623	21.449	22.496	19.472	30.071	0	0	0	0	0	0	0	0	0	0	0	0	0	0	0	0	0
k__Bacteria;p__Planctomycetes;c__unclassified;o__unclassified;f__unclassified;g__unclassified;s__Planctomycetes_bacterium_Pla100	0	0	0	0	0	0	0	0	0	0	0	0	0	0	0	0	0	0	0	0	0	0	0	0	0	0	1	4	1	0	1	0	0	0	0	0	0	0	0	0	0	0	0	0	0	0	0	0
k__Bacteria;p__Planctomycetes;c__unclassified;o__unclassified;f__unclassified;g__unclassified;s__Planctomycetes_bacterium_SRT547	0	0	3	0	0	0	0	0	0	0	0	0	0	0	0	0	0	0	0	0	0	0	0	0	0	0	1	0	0	1	0	0	0	0	0	0	0	0	0	0	0	0	0	0	0	0	0	0
k__Bacteria;p__Proteobacteria;c__Alphaproteobacteria;o__Caulobacterales;f__Caulobacteraceae;g__Asticcacaulis;s__Asticcacaulis_excentricus	0	0	0	0	0	0	0	0	0	0	0	0	0	0	1	0	1	0	0	1	0	0	0	3	0	1	0	1	0	0	0	3	0	2	0	0	0	0	0	0	0	0	4	0	0	0	0	0
k__Bacteria;p__Proteobacteria;c__Alphaproteobacteria;o__Caulobacterales;f__Caulobacteraceae;g__Asticcacaulis;s__Asticcacaulis_tiandongensis	0	3	0	0	0	0	0	0	0	0	0	0	0	0	0	0	0	0	0	0	0	0	0	0	0	0	0	0	0	0	0	0	0	0	0	0	0	0	0	0	0	0	0	0	0	0	0	0
k__Bacteria;p__Proteobacteria;c__Alphaproteobacteria;o__Caulobacterales;f__Caulobacteraceae;g__Caulobacter;s__Caulobacter_henricii	0	0	0	0	0	1	3	3	0	0	0	0	0	0	0	0	0	0	0	0	0	0	0	0	0	0	0	0	0	0	0	0	0	0	0	0	0	0	0	0	0	0	0	0	0	0	0	0
k__Bacteria;p__Proteobacteria;c__Alphaproteobacteria;o__Caulobacterales;f__Caulobacteraceae;g__Caulobacter;s__Caulobacter_sp._602-1	0	3	0	0	0	0	0	0	0	0	0	0	0	0	3	0	0	0	0	0	0	0	0	0	0	0	0	0	0	0	2	0	0	0	0	0	0	0	3	0	0	0	0	0	0	0	0	0
k__Bacteria;p__Proteobacteria;c__Alphaproteobacteria;o__Caulobacterales;f__Caulobacteraceae;g__Caulobacter;s__Caulobacter_sp._K31	0	0	0	0	0	0	0	0	0	0	0	0	0	0	3	0	0	0	0	0	0	0	0	0	0	0	0	0	0	0	0	0	0	0	0	0	0	0	0	0	0	0	0	0	0	1	0	0
k__Bacteria;p__Proteobacteria;c__Alphaproteobacteria;o__Caulobacterales;f__Caulobacteraceae;g__Caulobacter;s__Caulobacter_sp._Root655	340	0	381.375	0	1	0	0	0	2	0	3	1	2	0	0	3	1	1	0	1	0	2	2	0	985.534	0	987	619.308	682	762	746	0	0	0	0	0	0	0	0	0	0	0	0	0	0	0	0	0
k__Bacteria;p__Proteobacteria;c__Alphaproteobacteria;o__Caulobacterales;f__Caulobacteraceae;g__Caulobacter;s__Caulobacter_sp._Root656	0	5	0	0	0	0	0	0	0	0	0	0	0	0	0	0	0	0	0	0	0	0	0	0	0	0	0	0	0	0	0	0	0	0	0	0	0	0	0	0	0	0	0	0	0	0	0	0
k__Bacteria;p__Proteobacteria;c__Alphaproteobacteria;o__Caulobacterales;f__Caulobacteraceae;g__Caulobacter;s__Caulobacter_sp._X	0	0	0	0	0	4	0	0	0	0	0	0	0	0	0	0	0	0	0	0	0	0	0	0	0	0	0	0	0	0	0	0	0	0	0	0	3	0	0	0	0	0	0	0	0	0	0	0
k__Bacteria;p__Proteobacteria;c__Alphaproteobacteria;o__Caulobacterales;f__Caulobacteraceae;g__Caulobacter;s__Caulobacter_vibrioides	0	3	0	0	0	0	0	0	0	0	0	0	0	0	0	0	0	0	0	0	0	0	0	0	0	0	0	0	0	0	0	0	0	0	0	0	0	0	0	0	0	0	0	0	0	0	0	0
k__Bacteria;p__Proteobacteria;c__Alphaproteobacteria;o__Caulobacterales;f__Caulobacteraceae;g__Caulobacter;s__Caulobacter_zeae	0	0	0	0	0	0	0	0	0	0	0	0	0	0	0	0	0	0	0	0	0	0	0	0	0	0	0	0	0	0	0	0	0	0	0	0	0	3	0	0	0	0	0	0	0	0	0	0
k__Bacteria;p__Proteobacteria;c__Alphaproteobacteria;o__Caulobacterales;f__Caulobacteraceae;g__Phenylobacterium;s__Phenylobacterium_hankyongense	0	0	0	0	0	0	0	0	0	0	0	0	4	0	0	0	0	0	0	0	0	0	0	0	0	0	0	0	0	0	0	0	0	0	0	0	0	0	0	0	0	0	0	0	0	0	0	0
k__Bacteria;p__Proteobacteria;c__Alphaproteobacteria;o__Caulobacterales;f__Caulobacteraceae;g__Phenylobacterium;s__Phenylobacterium_sp.	0	0	0	0	0	0	0	4	0	0	0	0	0	0	0	0	0	0	0	0	0	0	0	0	0	0	0	0	0	0	0	0	0	0	0	0	0	0	0	0	0	0	0	0	0	0	0	0
k__Bacteria;p__Proteobacteria;c__Alphaproteobacteria;o__Caulobacterales;f__Caulobacteraceae;g__Phenylobacterium;s__Phenylobacterium_sp._HYN0004	0	0	0	3	0	0	0	0	0	0	0	0	0	0	0	0	0	0	0	0	0	0	0	0	0	0	0	0	0	0	2	0	0	0	0	0	0	0	0	0	0	0	0	0	0	0	0	0
k__Bacteria;p__Proteobacteria;c__Alphaproteobacteria;o__Caulobacterales;f__Caulobacteraceae;g__Phenylobacterium;s__Phenylobacterium_sp._RIFCSPHIGHO2_01_FULL_69_31	0	3	0	0	0	0	0	0	0	0	0	0	0	0	0	0	0	0	0	0	0	0	0	0	0	0	0	0	0	0	0	0	0	0	0	0	0	0	0	0	0	0	0	0	0	0	0	0
k__Bacteria;p__Proteobacteria;c__Alphaproteobacteria;o__Caulobacterales;f__Caulobacteraceae;g__Phenylobacterium;s__Phenylobacterium_sp._RIFCSPHIGHO2_01_FULL_70_10	0	0	0	0	0	0	0	0	0	0	0	0	0	0	0	3	0	0	0	0	0	0	0	0	0	0	0	0	0	0	0	0	0	0	0	0	0	0	0	0	0	0	0	0	0	0	0	0
k__Bacteria;p__Proteobacteria;c__Alphaproteobacteria;o__Caulobacterales;f__Caulobacteraceae;g__Phenylobacterium;s__Phenylobacterium_sp._SCN_69-14	0	0	0	0	0	0	0	0	0	0	0	0	0	0	0	0	0	0	0	0	0	0	0	0	0	0	0	0	0	0	0	3	0	0	0	0	0	0	0	0	0	0	0	0	0	0	0	0
[truncated: 533 more rows]
